# Supplementary material for: Small molecules for cell reprogramming: a systems biology analysis
Source: Aging (Albany NY). 2021 Dec 17;13(24):25739–62. doi: 10.18632/aging.203791 (PMC8751603; doi:10.18632/aging.203791)
Supplement: Supplementary Table 1 [file aging-13-203791-s002.xlsx]

## Sheet: S Table 1
Supplementary Table 1. 92 chemical compounds.
Compound name	Formula	MW (g/mol)	Main bioactivity/target(s)	Role in cell dedifferentiation (Inducer/Enhancer)	Comments relevant to cellular reprogramming	Link to PubChem	References	PMID	CID
2-Me-5HT	C11H14N2O	190.2	5-HT3 receptor (serotonin) agonist	Inducer	Tryptamine derivative; May substitute Oct4	https://pubchem.ncbi.nlm.nih.gov/search/#query=2-methyl-5-hydroxytryptamine	Hou et al. 2013	23868920	1574
5'-Azacytidine (5'-azaC)	C8H12N4O5	244.2	DNMT inhibitor	Enhancer	Anticancer drug; Natural metabolite	https://pubchem.ncbi.nlm.nih.gov/search/#query=5'-azacytidine	Shi et al. 2008 Huangfu et al. 2008 Hou et al. 2013 Qin et al. 2017	18983970 18568017 23868920 28698932	9444
5-Aza-2'-deoxycytidine	C8H12N4O4	228.2	DNMT inhibitor	Enhancer	Deoxy derivative (a chemical analogue) of cytidine, a nucleoside in DNA and RNA; Natural metabolite	https://pubchem.ncbi.nlm.nih.gov/compound/451668	Shi et al. 2008 Huangfu et al. 2008 Hou et al. 2013 Qin et al. 2017	18983970 18568017 23868920 28698932	451668
7-hydroxyflavone	C15H10O3	238.2	CDK1/2/5 inhibitor	Enhancer	x6	https://pubchem.ncbi.nlm.nih.gov/search/#query=7-hydroxyflavone	Lyssiotis et al. 2009	19447925	5281894
8-Br-cAMP	C10H11BrN5O6P	408.1	Cyclic AMP-dependent protein kinase activator	Enhancer	Alone x2 or with VPA x6.5	https://pubchem.ncbi.nlm.nih.gov/search/#query=8-Br-cAMP	Wan, 2011	21120637	32014
90-D3 (Vitamin D3)	C27H44O	384.6	Vitamin D3	Enhancer	Facilitate reprogramming by inducing an open chromatin state in MEFs; natural metabolite	https://pubchem.ncbi.nlm.nih.gov/search/#query=Vitamin%20D3	Wei et al. 2014	24838272	5280795
A-83-01	C25H19N5S	421.5	TGF-beta receptor inhibitor	Enhancer and inducer	Can improve reprogramming efficiency by 170-fold	https://pubchem.ncbi.nlm.nih.gov/search/#query=A-83-01	Li et al. 2016 Zhu et al. 2010	27132887 11125602	16218924
Ado X (2-Chloroadenosine)	C10H12ClN5O4	301.7	Adenosylhomocysteine hydrolase inhibitor; HMT Inhibitor	Enhancer	In combination with VC6TF, facilitates pluripotency	https://pubchem.ncbi.nlm.nih.gov/search/#query=Ado%20X	Hou et al. 2013 Baranek et al. 2016	23868920 27918060	8974
Alsterpaullone	C16H11N3O3	293.3	Cyclin-dependent kinase inhibitor	Enhancer	Targets GSK3β	https://pubchem.ncbi.nlm.nih.gov/search/#query=Alsterpaullone	Li, 2012	23011139	5005498
AM580	C22H25NO3	351.4	Nuclear retinoic acid receptor (RARα)-selective agonist	Enhancer	Promotes the expression of XEN marker genes, such as Sall4, Gata4, and Sox17; Enhances the reprogramming efficiency by 200-fold in MEFs and also acts as a booster in reprogramming of intestinal epithelial cells (IECs) to pluripotency	https://pubchem.ncbi.nlm.nih.gov/search/#query=AM580	Hou et al. 2013 Zhao et al. 2015	23868920 26686652	2126
AMI-5	C20H6Br4Na2O5	691.9	Arginine methyltransferase inhibitor	Inducer	With A-83-01, enables Oct4-induced iP	https://pubchem.ncbi.nlm.nih.gov/search/#query=AMI-5	Yuan et al. 2011	21425417	9810212
Apigenin	C15H10O5	270.2	Upregulates E-cadherin	Enhancer	Natural plant compound (flavonoid)	https://pubchem.ncbi.nlm.nih.gov/search/#query=Apigenin	Chen et al. 2010	20521328	5280443
BayK (BayK8644)	C16H15F3N2O4	356.3	Calcium channel agonist; Structural analog of nifedipine	Enhancer	See also BIX-01294	https://pubchem.ncbi.nlm.nih.gov/search/#query=BayK	Shi et al. 2008	18983970	2303
BIX-01294 (BIX)	C28H38N6O2	490.6	G9a HMT inhibitor	Inducer	With BayK, enables reprogramming of Oct4/Klf4-transduced MEF	https://pubchem.ncbi.nlm.nih.gov/search/#query=BIX-01294	Shi et al. 2008	18983970	25150857
BrdU	C9H11BrN2O5	307.1	Involved in DNA replication	Inducer	Synthetic analog of thymidine; Can replace OCT4	https://pubchem.ncbi.nlm.nih.gov/search/#query=BrdU	Long et al. 2015	26251165	6035
Caffeic acid	C9H8O4	180.2	DNMT inhibitor	Putative enhancer or inducer	Common coffee polyphenol; Natural plant compund	https://pubchem.ncbi.nlm.nih.gov/search/#query=Caffeic%20acid	Lee, 2006	16081510	689043
Ch 55 (Ch55, or Ch-55)	C24H28O3	364.5	Retinoid acid receptor (RAR) agonist	Enhancer	Promotes iP together VPA, CHIR99021, 616452, tranylcypromine, forskolin, EPZ 004777, PD0325901	https://pubchem.ncbi.nlm.nih.gov/search/#query=Ch%2055	Ye et al. 2016	26704449	6184667
CHIR99021	C22H18Cl2N8	465.3	GSK3 inhibitor	Inducer	Together with Parnate can replace Sox2 and c-Myc	https://pubchem.ncbi.nlm.nih.gov/search/#query=CHIR99021	Chen et al. 2014 Li et al. 2011 Hou et al. 2013	24638034 20956998 23868920	9956119
Chlorogenic acid	C16H18O9	354.3	DNMT inhibitor	Putative enhancer or inducer	Common coffee polyphenol; Natural plant compund	https://pubchem.ncbi.nlm.nih.gov/search/#query=Chlorogenic%20acid	Lee, 2006	16081510	1794427
Curcumin	C21H20O6	368.4	Antioxidant	Enhancer	x2; natural plant compound	https://pubchem.ncbi.nlm.nih.gov/search/#query=Curcumin	Chen et al. 2011	21615676	969516
Cyclic pifithrin-alpha	C16H17BrN2S	349.3	Inhibitor of p53	Inducer	In combination with A-83-01, CHIR99021, thiazovivin, NaB, and PD0325901 significantly enhances the reprogramming efficiency for hUCs (170-fold more)	https://pubchem.ncbi.nlm.nih.gov/search/#query=Cyclic%20pifithrin-a	Li et al. 2016	27132887	11515812
CYT296	not found		Induces chromatin decondensation (without affecting the acetylation level of histones)	Enhancer	Derivative of 90-D3; Promotes chromatin de-condensation; Enhances OSKM-mediated induction of iPSCs by > 10 folds	Not found	Wei et al. 2014	24838272	N/A
D4476	C23H18N4O3	398.4	Casein kinase 1 (CK1) inhibitor	Inducer	Can substitute Oct4	https://pubchem.ncbi.nlm.nih.gov/search/#query=D4476	Hou et al. 2013	23868920	6419753
Dasatinib	C22H26ClN7O2S	488	TGF-beta receptor inhibitor	Inducer	Senolytic; Can functionally replace Sox2	https://pubchem.ncbi.nlm.nih.gov/search/#query=Dasatinib	Starek et al. 2011 Baranek et al. 2016	19818703 27918060	3062316
Deaza-adenosine (3-Deaza-Adenosine)	C11H14N4O4	266.3	AdoHcy (SAH) hydrolase inhibitor --> inhibits AdoMet-dependent methyltransferases (antagonist HMT- and DNMT-like activity)	Inducer/Enhancer	In combination with VPA, CHIR99021, 616452, Tranylcypromine, Forskolin can induce pluripotency	https://pubchem.ncbi.nlm.nih.gov/search/#query=Deaza-adenosine	Tehlivets et al. 2013 Baranek et al. 2016	23017368 27918060	6245
Dexamethasone	C22H29FO5	392.5	Glucocorticoid hormone	Enhancer	In combination with 5’-azaC improved pluripotency by 2.6 fold; natural metabolite	https://pubchem.ncbi.nlm.nih.gov/search/#query=Dexamethasone	Shi et al. 2008 Huangfu et al. 2008	18983970 18568017	5743
Dinitrophenol (2,4-Dinitrophenol)	C6H4N2O5	184.1	OXPHOS uncoupler; Promotes glycolytic metabolism	Enhancer	Promotes glycolysis	https://pubchem.ncbi.nlm.nih.gov/search/#query=dinitrophenol	Zhu et al. 2010	21112560	1493
DY131 (DY 131, DY-131)	C18H21N3O2	311.4	Estrogen-related receptors (ERRβ and ERRγ) agonist	Enhancer	Improves reprogramming efficiency in combination with VPA, CHIR99021, 616452, Tranylcypromine, Forskolin and DZNep in MEFs	https://pubchem.ncbi.nlm.nih.gov/search/#query=DY131	Hou et al. 2013	23868920	5497124
DZNep	C12H14N4O8	262.3	Inhibitor of HMT EZH2 and SAH synthesis	Enhancer	Together with VPA, CHIR99021, 616452, Tranylcypromine, Forskolin enhances reprogramming by a factor of up to 65	https://pubchem.ncbi.nlm.nih.gov/search/#query=DZNep	Hou et al. 2013 Ye al. 2016 Qin et al. 2017	23868920 26704449 28698932	73087
EGCG	C22H18O11	458.4	Activator of sonic Hedgehog signaling [see also Oxysterol and Purmorphamine]	Enhancer	Found in green tea (natural plant compound)	https://pubchem.ncbi.nlm.nih.gov/search/#query=EGCG	Tang et al. 2012	21796625	65064
EI-275 (PP1 or PP 1)	C16H19N5	281.4	Src-family kinase inhibitor	Inducer	Can functionally replace Sox2	https://pubchem.ncbi.nlm.nih.gov/search/#query=PP1	Ichida et al. 2009	19818703	1400
EPZ004777, or EPZ 004777 (EPZ, E)	C28H41N7O4	539.7	DOT1L histone (H3K79) methyltransferase inhibitor	Enhancer	Promote the expression of XEN marker genes, such as Sall4, Gata4, and Sox17	https://pubchem.ncbi.nlm.nih.gov/search/#query=EPZ%20004777	Ye et al. 2016 Zhao et al. 2015	26704449 26686652	56962336
Fisetin	C15H10O6	286.24	Sirtuin activator (HDAC modifier); senolytic	Enhancer	x3; Senolytic; Natural plant compound	https://pubchem.ncbi.nlm.nih.gov/search/#query=Fisetin	Chen et al. 2011	21615676	5281614
Forskolin (FSK)	C22H34O7	410.5	Activates the enzyme Adenylyl cyclase and increases intracellular levels of cAMP	Inducer	Can replace OCT4; Natural plant compound	https://pubchem.ncbi.nlm.nih.gov/search/#query=Forskolin	Hou et al. 2013 Ye et al. 2016 Zhao et al. 2015	23868920 26704449 26686652	47936
Fru-2,6-P2	C6H14O12P2	340.12	Strongly activates PFK-1 to stimulate glycolysis	Enhancer	Enhances reprogramming by promoting glycolytic metabolism; Natural metabolite	https://pubchem.ncbi.nlm.nih.gov/search/#query=Fructose%202%2C6-bisphosphate	Zhu et al. 2010	21112560	105021
IBMX	C10H14N4O2	222.2	Phosphodiesterase inhibitor; Raises intracellular cAMP	Inducer	Promotes reprogrammin together with VPA, CHIR99021, 616452, tranylcypromine, forskolin, DZNep, TTNPB	https://pubchem.ncbi.nlm.nih.gov/search/#query=IBMX	Hou et al. 2013 Baranek et al. 2016	23868920 27918060	3758
iPYrazine (iPy)	C31H41N11O5	647.7	Src-family kinase inhibitor	Inducer	Can functionally replace Sox2	https://pubchem.ncbi.nlm.nih.gov/compound/389089	Ichida et al. 2009 Starek et al. 2011	19818703 27918060	389089
Kenpaullone	C16H11BrN2O	327.2	GSK3 and CDK1/2/5 inhibitor	Inducer	Can replace Klf4	https://pubchem.ncbi.nlm.nih.gov/search/#query=Kenpaullone	Lyssiotis et al. 2009	19447925	3820
Lithium carbonate	Li2CO3	73.9	GSK3 inhibitor	Inducer	Can replace CHIR99021	https://pubchem.ncbi.nlm.nih.gov/search/#query=Lithium%20carbonate	Chen et al. 2014	21727907 24638034	11125
Lithium chloride	LiCl	42.4	GSK3 inhibitor	Inducer	Can replace CHIR99021	https://pubchem.ncbi.nlm.nih.gov/search/#query=LiCl	Wang et al. 2011	21727907 24638034	433294
Luteolin	C15H10O6	286.2	Upregulates E-cadherin	Enhancer	Natural plant compound (flavonoid)	https://pubchem.ncbi.nlm.nih.gov/search/#query=Luteolin	Chen et al. 2010	20521328	5280445
LY294002	C19H17NO3	307.3	PI3K inhibitor	Enhancer	x4	https://pubchem.ncbi.nlm.nih.gov/search/#query=LY294002	Chen et al. 2011	21615676	3973
LY-364947 (E-616451)	C17H12N4	272.3	Potent and selective inhibitor of the TGFβR-1/ALK5	Inducer	See RepSox	https://pubchem.ncbi.nlm.nih.gov/search/#query=LY-364947	Ichida et al. 2009	19818703	447966
Lysergic acid	C18H21N3O	295.4	Activates DARPP-32-related pathways; Enhances dopamine D2 receptor protomer recognition and signaling of D2–5-HT2A receptor complexes	Enhancer	NA	https://pubchem.ncbi.nlm.nih.gov/search/#query=Lysergic%20acid%20ethylamide	Lyssiotis et al. 2009	19447925	12304966
ML-7	C15H18ClIN2O2S	452.7	Myosin light chain kinase (MLCK) inhibitor	Enhancer	Targets Myosin light-chain kinase protein	https://pubchem.ncbi.nlm.nih.gov/search/#query=ML-7	Li , 2012	23011139	9803932
N-acetyl-cysteine	C5H9NO3S	163.2	Antioxidant	Enhancer	Reactive oxygen species (ROS) scavenger	https://pubchem.ncbi.nlm.nih.gov/search/#query=N-acetyl-cysteine	Ji et al. 2014	24511469	12035
Neplanocin (Neplanocin A or Neplanocin-A)	C11H16N5O3	263.25	AdoHcy (SAH) hydrolase inhibitor --> inhibits AdoMet-dependent methyltransferases (antagonist of HMT- and DNMT-like activity)	Enhancer	See also DZNep	https://pubchem.ncbi.nlm.nih.gov/search/#query=Neplanocin	Baranek et al. 2016	27918060	N/A
Nimesulide	C13H12N2O5S	308.3	COX-2 inhibitor	Enhancer	Antioxidant	https://pubchem.ncbi.nlm.nih.gov/search/#query=Nimesulide	Hou et al. 2013	23868920	4495
N-oxalylglycine	C4H5NO5	147.1	HIF activator; promotes glycolytic metabolism	Enhancer	Promotes glycolytic metabolism and enhances the efficiency of pluripotency induction by 3,5-fold in human umbilical vein endothelial cells (HUVECs)	https://pubchem.ncbi.nlm.nih.gov/search/#query=N-oxalylglycine	Zhu et al. 2010	21112560	3080614
O4I3	not found		Histone H3K demethylase inhibitor; induced Oct4	Enhancer	Enhances OSKM-induced reprogramming	Not found	Dabiri et al, 2019	30685712	N/A
OAC1	C14H11N3O	237.3	Oct4-activating compound 1	Enhancer	Enhanced the iPSC reprogramming efficiency and accelerated the reprogramming process in combination with OSKM	https://pubchem.ncbi.nlm.nih.gov/search/#query=OAC1	Li et al. 2012	23213213	789882
OAC2	C15H12N2O	236.3	Oct4-activating compound 2	Enhancer	See OAC1	https://pubchem.ncbi.nlm.nih.gov/search/#query=OAC2	Li et al. 2012	23213213	2814138
OAC3	C15H11FN2O	254.3	Oct4-activating compound 3	Enhancer	See OAC2	https://pubchem.ncbi.nlm.nih.gov/search/#query=OAC3	Li et al. 2012	23213213	2814506
Oxysterol	C27H46O2	402.7	Activator of sonic Hedgehog signaling [see also EGCG and Purmorphamine]	Enhancer	In combination with Oct4, can replace Sox2, Klf4 and c-Myc	https://pubchem.ncbi.nlm.nih.gov/search/#query=Oxycholesterol	Moon et al. 2011	21709693	129736175
Parnate (Tranylcypromine)	C9H11N	133.19	Histone lysine-specific demethylase 1 Inhibitor	Inducer	See CHIR99021	https://pubchem.ncbi.nlm.nih.gov/search/#query=Parnate	Ye et al. 2016 Li et al. 2009 Cheng et al. 2014	26704449 19839055 24638034	5530
PD0325901	C16H14F3IN2O4	482.2	Potent MKK1 (MEK1) and MKK2 (MEK2) inhibitor	Enhancer and inducer	Together with NaB, A83-01, PS48 can replace SKM	https://pubchem.ncbi.nlm.nih.gov/search/#query=PD0325901	Yuan et al. 2011 Hou et al. 2013 Mcglothlen, 2000	21425417 23868920 11125602	9826528
PP242 (Torkinib)	C16H16N6O	308.3	mTOR inhibitor	Enhancer	x5	https://pubchem.ncbi.nlm.nih.gov/search/#query=PP242	Zhao et al. 2015 Chen et al. 2011	26686652 21615676	135565635
PP3, or PP 3, or Pp3	C11H9N5	211.2	Inhibitor of Epidermal growth factor receptor (EGFR); Negative control for the Src kinase inhibitor	Enhancer	Targets Epidermal growth factor receptor (EGFR) kinase protein	https://pubchem.ncbi.nlm.nih.gov/search/#query=PP3	Li , 2012	23011139	4879
PQ401	C18H16ClN3O2	341.8	IGF-1R inhibitor	Enhancer	x4	https://pubchem.ncbi.nlm.nih.gov/search/#query=PQ401	Chen et al. 2011	21615676	9549305
Prostaglandin E2	C20H32O5	352.5	Potent activator of Wnt signaling pathway	Enhancer	Improves reprogramming efficiency in combination with VPA, CHIR99021, 616452, Tranylcypromine, Forskolin and DZNep in MEFs; Natural metabolite	https://pubchem.ncbi.nlm.nih.gov/compound/14	Hou et al. 2013	23868920	14
PS48	C17H15ClO2	286.8	Activator of PDK1; Enhances glycolysis	Enhancer	x15	https://pubchem.ncbi.nlm.nih.gov/search/#query=5-(4-Chloro-phenyl)-3-phenyl-pent-2-enoic%20acid	Zhu et al. 2010	21112560	44141940
Purmorphamine	C31H32N6O2	520.6	Activator of sonic Hedgehog signaling [see also EGCG and Oxysterol]	Enhancer	In combination with Oct4, can replace Sox2, Klf4 and c-Myc (see also Oxysterol)	https://pubchem.ncbi.nlm.nih.gov/search/#query=Purmorphamine	Moon et al. 2011	21709693	5284329
Quercetin	C15H10O7	302.2	Mitochondrial ATPase and phosphodiesterase inhibitor SIRT1 activator	Enhancer	Senolytic; Flavonoid with anticancer activity; Natural plant compound	https://pubchem.ncbi.nlm.nih.gov/search/#query=Quercetin	Zhu et al. 2010	21112560	5280343
Rapamycin	C51H79NO13	914.2	mTOR inhibitor	Enhancer	x5; Natural metabolite	https://pubchem.ncbi.nlm.nih.gov/search/#query=Rapamycin	Chen et al. 2011	21615676	5284616
RepSox (E-616452)	C17H13N5	287.3	Potent and selective inhibitor of the TGFβR-1/ALK5 receptors	Inducer	Can replace Sox2	https://pubchem.ncbi.nlm.nih.gov/search/#query=RepSox	Cheng et al. 2014 Ichida et al. 2009 Wei et al. 2014	24638034 19818703 24838272	449054
Resveratrol	C14H12O3	228.2	Sirtuin activator (HDAC modifier); antioxidant	Enhancer	x6; improve Oct4 and Sox2-induced efficiency; Natural plant compound	https://pubchem.ncbi.nlm.nih.gov/search/#query=Resveratrol	Chen et al. 2011	21615676	445154
Retinoic acid	C20H28O2	300.4	Metabolite of vitamin A (retinol)	Enhancer	Together with OSKM increased reprogramming efficiency and shortened the reprogramming course	https://pubchem.ncbi.nlm.nih.gov/search/#query=Retinoic%20acid	Yang et al. 2015	25546009	444795
Reversine	C21H27N7O	393.5	Adenosine A3 receptor antagonist and an Aurora kinase inhibitor; a member of the 9H-purine class of purines	Inducer	https://www.caymanchem.com/product/10004412	https://pubchem.ncbi.nlm.nih.gov/compound/210332	Chen et al. 2004 Piccoli et al. 2019	14719906 30605049	210332
RG108	C19H14N2O4	334.3	DNMT inhibitor	Enhancer	Can activate the silenced pluripotency genes and promote reprogramming	https://pubchem.ncbi.nlm.nih.gov/search/#query=RG108	Qin et al. 2017 Hou et al. 2013	28698932 23868920	702558
Rolipram	C16H21NO3	275.3	Phosphodiesterase-4 (PDE4) inhibitor	Inducer	NA	https://pubchem.ncbi.nlm.nih.gov/search/#query=Rolipram	Hou et al. 2013	23868920	5092
RSC133	C18H15N3O2	305.3	DMT and HDAC inhibitor	Enhancer	Can enhance reprogramming and maintaine pluripotencyin human somatic cells	https://pubchem.ncbi.nlm.nih.gov/search/#query=RSC133	Lee et al. 2012	23125037	24799203
SAHA	C14H20N2O3	264.3	HDAC inhibitor	Enhancer	Improves four TF induced reprogramming efficiency in MEFs; Natural plant compound	https://pubchem.ncbi.nlm.nih.gov/search/#query=Suberoylanilide%20hydroxamic%20acid	Pandian et al. 2012 Huangfu et al. 2008	22848790 18568017	5311
SB 505124 (SB-505124 or SB505124)	C20H21N3O2	335.4	TGF-beta-1 receptor inhibitor	Inducer and enhancer	Can replace RepSox	https://pubchem.ncbi.nlm.nih.gov/search/#query=SB%20505124	Maherali, 2009	19765992	9858940
SB 431542 (SB-431542 or SB431542)	C22H16N4O3	384.4	Potent and selective inhibitor of the TGFβR-1/ALK5 receptors	Inducer and enhancer	Can replace RepSox	https://pubchem.ncbi.nlm.nih.gov/search/#query=SB431542	Cheng et al. 2014 Chen et al. 2011 Vrbsky et al. 2015 Baranek et al. 2016	24638034 21615676 26039048 27918060	4521392
Scriptaid	C18H18N2O4	326.3	HDAC inhibitor [increases histone acetylation of histone 3 lysine 9 (H3K9)]	Enhancer	Together with Zebularine increase Oct4 and Sox2 expression	https://pubchem.ncbi.nlm.nih.gov/search/#query=Scriptaid	Xiong et al. 2013	23790013	5186
SF1670	C19H17NO3	307.3	Selective inhibitor of tumor suppressor PTEN	Enhancer	Improves reprogramming efficiency in combination with VPA, CHIR99021, 616452, Tranylcypromine, Forskolin and DZNep in MEFs	Not found in PubChem but available in Sigma	Hou et al. 2013	23868920	N/A
SGC0946, or SGC 0946 (S)	C28H40BrN7O4	618.6	Highly potent and selective DOT1L methyltransferase inhibitor; over 100-fold selective for other histone methyltransferases; reduces H3K79 dimethylation	Enhancer	x5	https://pubchem.ncbi.nlm.nih.gov/search/#query=SGC0946	Zhao et al. 2015	26686652	56962337
Sodium butyrate (NaB)	C4H7NaO2	110.1	HDAC inhibitor	Inducer and enhancer	NaB + PS48 can enhance iP efficiency over twenty-five fold; Nab + cyclic pifithrin-a, A-83-01, CHIR99021, thiazovivin, and PD0325901 can increase iP over 170 fold; natural metabolite	https://pubchem.ncbi.nlm.nih.gov/search/#query=Sodium%20butyrate	Zhu et al. 2010 Mali et al. 2010 Cheng et al. 2014 Li et al. 2016	21112560 20201064 24638034 27132887	5222465
SP600125 (SP 600125, or SP-600125)	C14H8N2O	220.23	JNK inhibitor	Enhancer	Potential regulator of cell reprogramming	https://pubchem.ncbi.nlm.nih.gov/search/#query=SP600125	Yao et al. 2014	24211391	8515
Spermidine	C7H19N3	145.3	Autophagy inducer	Enhancer	x3.6; natural metabolite	https://pubchem.ncbi.nlm.nih.gov/search/#query=Spermidine	Chen et al. 2011	21615676	1102
SRT1720	C25H24ClN7OS	506	Activator of the sirtuin subtype SIRT1 (HDAC modifier)	Enhancer	In combination with VPA, CHIR99021, 616452, Tranylcypromine	https://pubchem.ncbi.nlm.nih.gov/search/#query=SRT1720	Hou et al. 2013	23868920	25232708
Syk inhibitor	C18H15N3O3S	353.4	Spleen Tyrosine Kinase Inhibitor	Enhancer	NA	https://pubchem.ncbi.nlm.nih.gov/search/#query=Syk%20inhibitor	Li, 2012	23011139	6419747
Thiazovivin	C15H13N5OS	311.4	Rho Kinase (ROCK) inhibitor; Stabilizes E-cadherin on the cell surface, necessary for hESC survival in culture	Inducer	Promotes the transformation of fibroblasts into stem cells with a 200-fold efficiency over the classic method, when used in combination with ALK5 inhibitor SB-431542 (S4317) and MEK inhibitor PD-0325901 (PZ0162)	https://pubchem.ncbi.nlm.nih.gov/search/#query=Thiazovivin	Lin et al. 2009 Zhao et al. 2015	26686652 19838168 27132887	46209426
Tranilast	C18H17NO5	327.3	TGF-beta inhibitor	Inducer	Can replace RepSox	https://pubchem.ncbi.nlm.nih.gov/search/#query=Tranilast	Cheng et al. 2014	24638034	5282230
Trichostatin A (TSA)	C17H22N2O3	302.4	HDAC inhibitor	Inducer	Can replace VPA	https://pubchem.ncbi.nlm.nih.gov/search/#query=Trichostatin%20A	Huangfu et al. 2008		444732
TTNPB (Arotinoic acid)	C24H28O2	348.5	Synthetic retinoic acid receptor ligand	Enhancer	iP booster; Enhances reprogramming efficiency up to 40 fold	https://pubchem.ncbi.nlm.nih.gov/search/#query=TTNPB	Hou et al. 2013 Qin et al. 2017	23868920 28698932	5289501
UNC0638	C30H47N5O2	509.7	HMT inhibitor	Enhancer	Improves reprogramming efficiency in combination with VPA, CHIR99021, 616452, Tranylcypromine, Forskolin and DZNep in MEFs	https://pubchem.ncbi.nlm.nih.gov/search/#query=2-Cyclohexyl-N-(1-isopropylpiperidin-4-yl)-6-methoxy-7-(3-(pyrrolidin-1-yl)propoxy)%20quinazolin-4-amine	Hou et al. 2013	23868920	46224516
Valproic acid	C8H16O2	166.2	HDAC inhibitor	Inducer	Can replace c-Myc; natural metabolite	https://pubchem.ncbi.nlm.nih.gov/search/#query=Valproic%20acid	Huangfu et al. 2008 Cheng et al. 2014 Ye et al. 2016	18568017 24638034 26704449	3121
Vitamin A (Retinol acetate)	C20H30O	286.5	Precursor of retinoic acid (see Retinoic acid)	Enhancer	Synergize together with Vitamin C to enhance pluripotency; natural metabolite	https://pubchem.ncbi.nlm.nih.gov/search/#query=retinol	Hore et al. 2016	27729528	445354
Vitamin C (Ascorbic acid; Ascorbate)	C6H8O6	176.1	Tissue repair	Enhancer	Antioxidant; natural metabolite	https://pubchem.ncbi.nlm.nih.gov/search/#query=Vitamin%20C	Hore et al. 2016 Esteban et al, 2010	27729528 20036631	54670067
Zebularine	C9H12N2O5	228.2	DNMT inhibitor Decreases the level of DNA methylation of Oct-4 and Sox-2 promoter regions	Enhancer	Together with Scriptapid increase Oct4 and Sox2 expression (see Scriptaid)	https://pubchem.ncbi.nlm.nih.gov/search/#query=Zebularine	Xiong et al. 2013	23790013	100016
Zolpidem	C19H21N3O	307.4	Gamma-aminobutyric acid (GABA) receptor agonist	Enhancer	Enhancer of OSKM-induced reprogramming; natural metabolite	https://pubchem.ncbi.nlm.nih.gov/search/#query=zolpidem	Dabiri et al, 2019	30685712	5732
x(n) -- fold-increase in iP efficiency
2-Me-5HT -- 2-methyl-5-hydroxytryptamine
8-Br-cAMP -- Bromoadenosine 3′, 5′-cyclic monophosphate
BrdU -- Bromodeoxyuridine
D2–5-HT2A -- Dopamine D2 and serotonin 5-HT2A receptors
DARPP-32 -- Dopamine- and cAMP-regulated phosphoprotein
DNMT -- DNA methyltransferase
DZNep -- 3-Deazaneplanocin A
EGCG -- Epigallocatechin-3-Gallate
EZH -- Enhancer of Zeste Homologue
Fru-2,6-P2 -- Fructose 2,6-bisphosphate
GSK3 -- Glycogen synthase kinase 3
HDAC -- Histone deacetylase
HIF -- Hypoxia-inducible factor-1
HMT-- Histone methyltransferase
IBMX -- 3-Isobutyl-1-Methylxanthine
O4I3 -- OCT4-inducing compound 3
PDK1 -- 3′-phosphoinositide-dependent kinase-1
PFK-1-- Phosphofructokinase 1
PI3K -- Phosphoinositide 3-kinase
SAH -- S-Adenosyl-l-homocysteine
SAHA -- Suberoylanilide hydroxamic acid
