# Supplementary material for: Small molecules for cell reprogramming: a systems biology analysis
Source: Aging (Albany NY). 2021 Dec 17;13(24):25739–62. doi: 10.18632/aging.203791 (PMC8751603; doi:10.18632/aging.203791)
Supplement: Supplementary Table 2 [file aging-13-203791-s003.xlsx]

## Sheet: Sheet1
Supplementary Table 2. SMs - signaling modifiers.
Compound	Formula	MW (g/mol)	Main bioactivity/target(s)	Inducer/Enhancer	References		Total number of SMs - 51 of 92
IBMX	C10H14N4O2	222.24	Phosphodiesterase inhibitor; raises intracellular cAMP	Inducer	Hou et al. 2013		0.554
2-Me-5HT	C11H14N2O	190.24	5-HT3 receptor agonist	Inducer	Qin et al. 2017		Inducers	Enhancers	Enhancers/Inducers
7-hydroxyflavone	C15H10O3	238.24	CDK1/2/5 inhibitor	Enhancer	Lyssiotis et al. 2009		18	23	10
8-Br-cAMP	C10H11BrN5O6P	408.1	Cyclic AMP-dependent protein kinase activator	Enhancer	Wan, 2011
A-83-01	C25H19N5S	421.5	TGF-beta receptor inhibitor	Inducer	Mcglothlen , 2000
Ado X (2-Chloroadenosine)	C10H12ClN5O4	301.69	Adenosine receptor agonist	Enhancer	Hou et al. 2013
Alsterpaullone	C16H11N3O3	293.28	Cyclin-dependent kinase inhibitor	Enhancer	Li, 2012
AM580	C22H25NO3	351.4	Nuclear retinoic acid receptor (RARα)-selective agonist	Enhancer	Hou et al. 2013 Zhao et al. 2015
Apigenin	C15H10O5	270.24	Upregulates E-cadherin	Enhancer	Chen et al. 2010
BrdU	C9H11BrN2O5	307.1	Can replace OCT4; a synthetic analog of thymidine	Inducer	Long et al. 2015
Ch 55	C24H28O3	364.5	Retinoid acid receptor (RAR) agonist	Enhancer	Ye et al. 2016
Cyclic pifithrin-alpha	C16H17BrN2S	349.3	Inhibitor of p53	Inducer	Li et al. 2016
D4476	C23H18N4O3	398.4	Casein kinase 1 (CK1) inhibitor	Inducer	Qin et al. 2017
Dasatinib	C22H26ClN7O2S	488	TGF-beta receptor inhibitor; senolytic	Inducer	Ichida et al. 2009
Dexamethasone	C22H29FO5	392.5	Glucocorticoid hormone	Enhancer	Shi et al. 2008 Huangfu et al. 2008
DY131	C18H21N3O2	311.4	Estrogen-related receptors (ERRβ and ERRγ) agonist	Enhancer	Hou et al. 2013
EGCG	C22H18O11	458.4	Sonic Hedgehog signaling [see -- Oxysterol]	Enhancer	Tang et al. 2012
EI-275	C16H19N5	281.36	Src-family kinase inhibitor	Inducer	Ichida et al. 2009
Forskolin (FSK)	C22H34O7	410.5	Activates the enzyme Adenylyl cyclase and increases intracellular levels of cAMP	Inducer	Qin et al. 2017 Ye et al. 2016 Zhao et al. 2015
iPYrazine (iPy)	C31H41N11O5	647.7	Src-family kinase inhibitor	Inducer	Ichida et al. 2009 Starek et al. 2011
Kenpaullone	C16H11BrN2O	327.17	GSK3 and CDK1/2/5 inhibitor	Inducer	Lyssiotis et al. 2009
Luteolin	C15H10O6	286.24	Upregulates E-cadherin	Enhancer	Chen et al. 2010
LY294002	C19H17NO3	307.3	PI3K inhibitor	Enhancer	Chen et al. 2011
Lysergic acid	C18H21N3O	295.4	Activates DARPP-32-related pathways Enhances dopamine D2 receptor protomer recognition and signaling of D2–5-HT2A receptor complexes	Enhancer	Lyssiotis et al. 2009
OAC1	C14H11N3O	237.26	Oct4-activating compound 1	Enhancer	Li et al. 2012
OAC2	C15H12N2O	236.27	Oct4-activating compound 2	Enhancer	Li et al. 2012
OAC3	C15H11FN2O	254.26	Oct4-activating compound 3	Enhancer	Li et al. 2012
Oxysterol	C27H46O2	402.7	Activator of sonic Hedgehog signaling	Enhancer	Moon et al. 2011
PD0325901	C16H14F3IN2O4	482.19	MEK1/2 inhibitor	Enhancer and inducer	Yuan et al. 2011 Hou et al. 2013 Mcglothlen, 2000
PP242 (Torkinib)	C16H16N6O	308.34	mTOR inhibitor	Enhancer and inducer	Zhao et al. 2015 Chen et al. 2011
PP3	C11H9N5	211.22	Inhibitor of Epidermal growth factor receptor (EGFR); Negative control for the Src kinase inhibitor	Enhancer and inducer	Li , 2012
PQ401	C18H16ClN3O2	341.8	IGF-1R inhibitor	Enhancer and inducer	Chen et al. 2011
Prostaglandin E2	C20H32O5	352.46	Potent activator of Wnt signaling pathway	Enhancer and inducer	Hou et al. 2013
PS48	C17H15ClO2	286.8	Activator of PDK1	Enhancer and inducer	Zhu et al. 2010
Purmorphamine	C31H32N6O2	520.6	Activator of sonic Hedgehog signaling	Enhancer and inducer	Moon et al. 2011
Rapamycin	C51H79NO13	914.2	mTOR inhibitor	Enhancer and inducer	Chen et al. 2011
RepSox (E-616452)	C17H13N5	287.32	Potent and selective inhibitor of the TGFβR-1/ALK5	Inducer	Cheng et al. 2014 Ichida et al. 2009 Wei et al. 2014
Resveratrol	C14H12O3	228.24	Sirtuin activator (antioxidant)	Inducer	Chen et al. 2011
Retinoic acid	C20H28O2	300.4	Metabolite of vitamin A	Inducer	Yang et al. 2015
Reversine	C21H27N7O	393.5	Adenosine A3 receptor antagonist and an Aurora kinase inhibitor	Inducer	Chen et al. 2004 Piccoli et al. 2019
Rolipram	C16H21NO3	275.34	phosphodiesterase-4 (PDE4) inhibitor	Inducer	Hou et al. 2013
SB 505124	C20H21N3O2	335.4	TGF-beta receptor inhibitor	Inducer and enhancer	Maherali, 2009
SB431542	C22H16N4O3	384.4	Inhibitor of the activin receptor-like kinase (ALK) receptors can replace RepSox	Inducer and enhancer	Cheng et al. 2014 Chen et al. 2011 Vrbsky et al. 2015
SF1670	C19H17NO3	307.3	Selective inhibitor of tumor suppressor PTEN	Enhancer	Hou et al. 2013
SP600125	C14H8N2O	220.23	JNK inhibitor	Enhancer	Jang et al. 2004
Syk inhibitor	C18H15N3O3S	353.4	Spleen Tyrosine Kinase Inhibitor	Enhancer	Li, 2012
Thiazovivin	C15H13N5OS	311.4	Rho Kinase (ROCK) inhibitor	Inducer	Lin et al. 2009 Zhao et al. 2015
Tranilast	C18H17NO5	327.3	TGF-beta inhibitor	Inducer	Cheng et al. 2014
TTNPB (Arotinoic acid)	C24H28O2	348.5	Synthetic retinoic acid receptor ligand	Enhancer	Hou et al. 2013 Qin et al. 2017
Vitamin A (Retinol acetate)	C20H30O	286.5	Precursor of retinoic acid	Enhancer	Hore et al. 2016
Zolpidem	C19H21N3O	307.4	Gamma-aminobutyric acid (GABA) receptor agonist	Enhancer	Dabiri et al, 2019
8-Br-cAMP -- 8-Bromoadenosine 3',5'-cyclic monophosphate
BrdU -- Bromodeoxyuridine
D2–5-HT2A -- 5-hydroxy-tryptamine
DARPP-32 - dopamine- and cyclic-AMP-regulated phosphoprotein of molecular weight 32kDa
EGCG - Epigallocatechin-3-Gallate
IBMX -- 3-Isobutyl-1-Methylxanthine
Me-5HT -- 2-methyl-5-hydroxytryptamine
