# Supplementary material for: Small molecules for cell reprogramming: a systems biology analysis
Source: Aging (Albany NY). 2021 Dec 17;13(24):25739–62. doi: 10.18632/aging.203791 (PMC8751603; doi:10.18632/aging.203791)
Supplement: Supplementary Table 3 [file aging-13-203791-s004.xlsx]

## Sheet: Sheet1
Supplementary Table 3. SMs - epigenetic modifiers.
Compound	Formula	MW (g/mol)	Main bioactivity/target(s)	Inducer/Enhancer	Reference		Total number of SMs - 26 of 92
5-Aza-2'-deoxycytidine	C8H12N4O4	228.2	DNMT inhibitor	Enhancer	Shi Y et al. 2008 Huangfu D et al. 2008 Hou P et al. 2013 Qin H et al. 2017		0.283
5'-Azacytidine (5'-azaC)	C8H12N4O5	244.2	DNMT inhibitor	Enhancer	Shi et al. 2008 Huangfu et al. 2008 Hou et al. 2013 Qin et al. 2017		Inducers	Enhancers	Enhancers/Inducers
AMI-5	C20H6Br4Na2O5	691.9	Arginine methyltransferase inhibitor	Inducer	Yuan et al. 2011		6	16	4
BIX-01294 (BIX)	C28H38N6O2	490.6	G9a HMT inhibitor	Inducer	Shi et al. 2008
Caffeic acid	C9H8O4	180.16	DNMT inhibitor	Putative enhancer or inducer	Lee, 2006
Chlorogenic acid	C16H18O9	354.31	DNMT inhibitor	Putative enhancer or inducer	Lee, 2006
CYT296	not found	-	Induces chromatin decondensation (without affecting the acetylation level of histones)	Enhancer	Wei et al. 2014
Deaza-adenosine (1-Deaza-Adenosine)	C11H14N4O4	266.25	AdoHcy (SAH) hydrolase inhibitor --> inhibits AdoMet-dependent methyltransferases (antagonist HMT- and DNMT-like activity)	Inducer/Enhancer	Tehlivets et al. 2013
DZNep	C12H14N4O8	262.26	Inhibitor of HMT EZH2 and SAH synthesis	Enhancer	Hou et al. 2013 Ye al. 2016 Qin et al. 2017
EPZ004777	C28H41N7O4	539.7	DOT1L histone (H3K79) methyltransferase inhibitor	Enhancer	Ye et al. 2016 Zhao et al. 2015
Fisetin	C15H10O6	286.24	Sirtuin activator (HDAC modifier); senolytic	Enhancer	Chen et al. 2011
Neplanocin (Neplanocin A or Neplanocin-A)	C11H16N5O3	263.25	AdoHcy (SAH) hydrolase inhibitor --> inhibits AdoMet-dependent methyltransferases (antagonist of HMT- and DNMT-like activity)	Enhancer	Baranek et al. 2016
O4I3	not found	-	Histone H3K demethylase inhibitor; induced Oct4	Enhancer	Dabiri et al, 2019
Parnate (Tranylcypromine)	C9H11N	133.2	Histone lysine-specific demethylase 1 Inhibitor	Inducer	Ye et al. 2016 Li et al. 2009 Cheng et al. 2014
Resveratrol	C14H12O3	228.24	Sirtuin activator (HDAC modifier); antioxidant	Enhancer	Chen et al. 2011
RG108	C19H14N2O4	334.3	DNMT inhibitor	Enhancer	Qin et al. 2017 Hou et al. 2013
RSC133	C18H15N3O2	305.3	DNMT and HDAC inhibitor	Enhancer	Lee et al. 2012
SAHA	C14H20N2O3	264.32	HDAC inhibitor	Enhancer	Pandian et al. 2012 Huangfu et al. 2008
Scriptaid	C18H18N2O4	326.3	HDAC inhibitor [increases histone acetylation of histone 3 lysine 9 (H3K9)]	Enhancer	Xiong et al. 2013
SGC0946	C28H40BrN7O4	618.6	DOT1L methyltransferase (HMT) inhibitor	Enhancer	Zhao et al. 2015
Sodium butyrate (NaB)	C4H7NaO2	110.09	HDAC inhibitor	Inducer and enhancer	Zhu et al. 2010 Mali et al. 2010 Cheng et al. 2014
SRT1720	C25H24ClN7OS	506	Activator of the sirtuin subtype SIRT1 (HDAC modifier)	Enhancer	Hou et al. 2013
Trichostatin A (TSA)	C17H22N2O3	302.37	HDAC inhibitor	Inducer	Huangfu et al. 2008
UNC0638	C30H47N5O2	509.7	HMT inhibitor	Enhancer	Qin et al. 2017
Valproic acid	C8H16O2	144.21	HDAC inhibitor	Inducer	Huangfu et al. 2008 Cheng et al. 2014 Ye et al. 2016
Zebularine	C9H12N2O5	228.2	DNMT inhibitor; Decreases the level of DNA methylation of Oct-4 and Sox-2 promoter regions	Inducer	Xiong et al. 2013
AdoHcy -- S-adenosyl-L-homocysteine
DNMT -- DNA methyltransferase
DZNep -- 3-Deazaneplanocin A
EZH2 -- enhancer of zeste homolog 2
HDAC -- histondeacytelase
HMT -- Histone methyltransferase
O4I3 -- OCT4-inducing compound 3
SAH -- S-adenosylhomocysteine
SAHA -- Suberoylanilide hydroxamic acid
