# Supplementary material for: Small molecules for cell reprogramming: a systems biology analysis
Source: Aging (Albany NY). 2021 Dec 17;13(24):25739–62. doi: 10.18632/aging.203791 (PMC8751603; doi:10.18632/aging.203791)
Supplement: Supplementary Table 4 [file aging-13-203791-s005.xlsx]

## Sheet: Sheet1
Supplementary Table 4.SMs - metabolic modifiers.
Compound	Formula	MW (g/mol)	Main bioactivity/target(s)	Inducer/Enhancer	References		Total number of SMs -- 7 of 92
Dinitrophenole	C6H4N2O5	184.11	OXPHOS uncoupler promotes glycolytic metabolism	Enhancer	Zhu et al. 2010		0.076
CHIR99021	C22H18Cl2N8	465.3	GSK3 inhibitor	Inducer	Chen et al. 2014 Li et al. 2011 Hou et al. 2013		Inducers	Enhancers	Enhancers/Inducers
Fru-2,6-P2	C6H14O12P2	340.1	Strongly activates PFK-1 to stimulate glycolysis	Enhancer	Zhu et al. 2010		3	4	0
Lithium carbonate	Li2CO3	73.9	GSK3 inhibitor	Inducer	Chen et al. 2014
Lithium chloride	LiCl	42.4	GSK3 inhibitor	Inducer	Wang et al. 2011
N-oxalylglycine	C4H5NO5	147.09	HIF activator; promotes glycolytic metabolism	Enhancer	Zhu et al. 2010
Quercetin	C15H10O7	302.23	HIF activator; mitochondrial ATPase and phosphodiesterase inhibitor; Senolytic; SIRT1 activator	Enhancer	Zhu et al. 2010
Dinitrophenole -- 2,4-Dinitrophenole
Fru-2,6-P2 -- 2,6-bisphosphate
HIF -- hypoxia-inducible factor-1
PFK-1 -- phosphofructokinase 1
