# Supplementary material for: Small molecules for cell reprogramming: a systems biology analysis
Source: Aging (Albany NY). 2021 Dec 17;13(24):25739–62. doi: 10.18632/aging.203791 (PMC8751603; doi:10.18632/aging.203791)
Supplement: Supplementary Table 5 [file aging-13-203791-s006.xlsx]

## Sheet: Sheet1
Supplementary Table 5. SMs - other categories.
Compound	Formula	MW (g/mol)	Main bioactivity/target(s)	Inducer/Enhancer	References
90-D3 (Vitamin D3)	C27H44O	384.6	Regulator of calcium metabolism	Enhancer	Wei et al. 2014		Total number SMs -- 8 of 92
BayK (BayK8644)	C16H15F3N2O4	356.3	Calcium channel agonist; a structural analog of nifedipine	Enhancer	Shi et al. 2008		0.087
Curcumin	C21H20O6	368.4	Antioxidant	Enhancer	Chen et al. 2011		Inducers	Enhancers	Enhancers/Inducers
ML-7	C15H18ClIN2O2S	452.7	Myosin light chain kinase (MLCK) inhibitor	Enhancer	Li , 2012		0	8	0
N-acetyl-cysteine	C5H9NO3S	163.2	Antioxidant	Enhancer	Ji et al. 2014
Nimesulide	C13H12N2O5S	308.31	Antioxidant (COX-2 inhibitor)	Enhancer	Qin et al. 2017
Spermidine	C7H19N3	145.25	Autophagy inducer	Enhancer	Chen et al. 2011
Vitamin C	C6H8O6	176.12	Antioxidant Tissue repair	Enhancer	Hore et al. 2016 Esteban et al, 2010
COX-2 -- Cyclooxygenase-2
