# Supplementary material for: Small molecules for cell reprogramming: a systems biology analysis
Source: Aging (Albany NY). 2021 Dec 17;13(24):25739–62. doi: 10.18632/aging.203791 (PMC8751603; doi:10.18632/aging.203791)
Supplement: Supplementary Table 6 [file aging-13-203791-s007.xlsx]

## Sheet: ST6
Supplementary Table 6. SM cocktails for chemical reprogramming.
Cocktail #	Composition	Original cell cutures	Induced cell state	Reference
Cocktail 1 (VC6TF + TTNPB + DZNep)	Valproic acid CHIR99021 RepSox Parnate Forskolin DZNep TTNPB	MEFs	iPSCs	Hou et al. 2013
Cocktail 2 (NLS)	NaB LiCl SB431542	MEFs and TTFs	Neural progenitor cells	Cheng et al. 2014
Cocktail 3 (VCR)	VPA CHIR99021 RepSox	MEFs and TTFs	Neural progenitor cells	Cheng et al. 2014
Cocktail 4 (TLT)	Trichostatin A Li2CO3 Tranilast	MEFs and TTFs	Neural progenitor cells	Cheng et al. 2014
Cocktail 5 (BrdUC6F)	BrdU CHIR99021 RepSox Forskolin	MEFs	iPSCs	Long et al. 2015
Cocktail 6 (VC6TF + AM 580 + EPZ004777)	VPA CHIR99021 RepSox Parnate Forskolin AM 580 EPZ004777	MEFs	iPSCs	Zhao et al. 2015
Cocktail 7 (VC6TF + AM580 + DZNep + 5-aza-dC + SGC0946 + EPZ004777)	VPA CHIR99021 RepSox Parnate Forskolin AM 580 DZNep 5-aza-dC SGC0946 EPZ004777	MEFs	iPSCs	Zhao et al. 2015
Cocktail 8 (VC6TF + DZNep)	VPA CHIR99021 RepSox Parnate Forskolin DZNep	MEFs	iPSCs	Ye et al. 2016
Cocktail 9 (VC6TF + AM 580 + DZNep)	VPA CHIR99021 RepSox Parnate Forskolin AM 580 DZNep	MEFs Fetal mouse NSCs Mouse IECs	iPSCs	Ye et al. 2016
Cocktail 10 (CNɑATP)	CHIR99021 NaB cyclic pifithrin-a A-83-01 Thiazovivin PD0325901	Human Urine-Derived Cells	iPSCs	Li D et al. 2016
Valproic acid (V, VPA)		Mouse embryonic fibroblsts (MEFs)	Neural progenitor cells (iNPSc)
CHIR99021 (C)		Tail tip fobroblsts (TTFs)	Pluripotent stem cells (iPSCs)
RepSox (6)		Neural stem (progenitor) cells (NSCs)
Parnate (T)		Mouse small intestinal epithelial cells (IECs)
Forskolin (F)
Trichostatin A (TSA)
Cyclic pifithrin-a (ɑ)
