# Supplementary material for: Small molecules for cell reprogramming: a systems biology analysis
Source: Aging (Albany NY). 2021 Dec 17;13(24):25739–62. doi: 10.18632/aging.203791 (PMC8751603; doi:10.18632/aging.203791)
Supplement: Supplementary Table 7 [file aging-13-203791-s008.xlsx]

## Sheet: enrichment_for_targets_of_curat
Supplementary Table 7. The full list of enriched KEGG pathways of SM protein targets.
Category	Term	Count	%	PValue	Genes	List Total	Pop Hits	Pop Total	Fold Enrichment	Bonferroni	Benjamini	FDR
KEGG_PATHWAY	hsa00830:Retinol metabolism	55	5.37634	1.71263e-42	7363, 7365, 7364, 8694, 9227, 7367, 8854, 7366, 317749, 1577, 1576, 29785, 316, 8608, 6121, 158835, 1592, 157506, 10901, 1544, 124, 1543, 54600, 125, 54884, 127, 128, 1548, 8630, 130, 131, 54490, 1558, 5959, 1555, 54578, 79799, 54577, 54576, 1551, 54575, 145226, 216, 54659, 54658, 54657, 8228, 54579, 340665, 1559, 51109, 1562, 195814, 56603, 10720	759	64	6879	7.78872	4.70974e-40	4.70974e-40	2.19217e-40
KEGG_PATHWAY	hsa00053:Ascorbate and aldarate metabolism	17	1.66178	1.64412e-09	7363, 7365, 7364, 7367, 7366, 54490, 54600, 54578, 79799, 54577, 54576, 54575, 54659, 54658, 54657, 54579, 10720	759	27	6879	5.70649	4.52134e-07	7.06459e-09	3.28824e-09
KEGG_PATHWAY	hsa05212:Pancreatic cancer	40	3.91007	1.00733e-21	7046, 4790, 7048, 7422, 6772, 6774, 1021, 7040, 7042, 1019, 572, 3716, 595, 673, 598, 1950, 5599, 1956, 5294, 5594, 4087, 5595, 4088, 5970, 7157, 5894, 7039, 3551, 2064, 5290, 5291, 5293, 1147, 842, 207, 208, 5601, 5602, 5604, 5925	759	65	6879	5.57738	2.77014e-19	4.61691e-20	2.14896e-20
KEGG_PATHWAY	hsa05219:Bladder cancer	25	2.44379	1.77579e-13	7422, 11186, 1019, 1612, 595, 673, 1950, 3576, 999, 1956, 7057, 5594, 5595, 7157, 5894, 2064, 2261, 1026, 4312, 4313, 5604, 6714, 4318, 5605, 5925	759	41	6879	5.52637	4.88193e-11	1.31985e-12	6.14329e-13
KEGG_PATHWAY	hsa05223:Non-small cell lung cancer	34	3.32356	3.14666e-18	6256, 6258, 11186, 6257, 1021, 5915, 1019, 572, 595, 673, 1950, 5335, 5578, 5579, 6789, 2309, 1956, 5294, 5594, 5595, 7157, 5894, 7039, 2064, 5290, 5291, 5170, 5293, 842, 207, 208, 5604, 5605, 5925	759	56	6879	5.50268	8.65331e-16	4.8074e-17	2.23762e-17
KEGG_PATHWAY	hsa04150:mTOR signaling pathway	35	3.42131	1.21088e-18	6197, 6196, 6199, 6198, 5562, 6794, 7124, 5563, 25989, 6195, 6194, 673, 3479, 57521, 3630, 5578, 5579, 6009, 8408, 1978, 5294, 5594, 5595, 3551, 5290, 5291, 5170, 5293, 5728, 27330, 2475, 207, 7249, 208, 3667	759	58	6879	5.4692	3.32992e-16	1.95878e-17	9.11721e-18
KEGG_PATHWAY	hsa00232:Caffeine metabolism	3	0.293255	0.0967441	1544, 7498, 1548	759	5	6879	5.43794	1	0.164226	0.0967441
KEGG_PATHWAY	hsa04210:Apoptosis	37	3.61681	1.78061e-19	8772, 8795, 4790, 4792, 7124, 8797, 472, 330, 572, 596, 1676, 355, 598, 356, 317, 637, 836, 839, 5294, 8743, 5970, 7157, 3551, 5290, 9131, 5291, 581, 5293, 4914, 840, 1147, 841, 842, 843, 207, 208, 8837	759	62	6879	5.40871	4.89669e-17	3.70078e-18	1.72254e-18
KEGG_PATHWAY	hsa05230:Central carbon metabolism in cancer	37	3.61681	7.5914e-19	4233, 3815, 57103, 2322, 5214, 5159, 5315, 5979, 1956, 5294, 3091, 5594, 5595, 5211, 5156, 7157, 5894, 5213, 2263, 23410, 2064, 2261, 5290, 2260, 5291, 5293, 5728, 4914, 4916, 2475, 6513, 207, 208, 6514, 5604, 5605, 2539	759	64	6879	5.23969	2.08763e-16	1.30477e-17	6.07312e-18
KEGG_PATHWAY	hsa00040:Pentose and glucuronate interconversions	19	1.85728	9.87666e-10	7363, 7365, 7364, 7367, 7366, 54490, 231, 54600, 54578, 79799, 54577, 54576, 54575, 57016, 54659, 54658, 54657, 54579, 10720	759	33	6879	5.21823	2.71608e-07	4.45259e-09	2.07248e-09
KEGG_PATHWAY	hsa00982:Drug metabolism - cytochrome P450	39	3.81232	1.08753e-19	7363, 7365, 7364, 7367, 7366, 130, 131, 54490, 2944, 1558, 1557, 1555, 1577, 1576, 54578, 79799, 54577, 54576, 54575, 54659, 316, 54658, 218, 54657, 4128, 54579, 4129, 1559, 220, 1544, 124, 54600, 1565, 125, 2950, 127, 128, 1548, 10720	759	68	6879	5.19804	2.9907e-17	2.49225e-18	1.16003e-18
KEGG_PATHWAY	hsa00140:Steroid hormone biosynthesis	33	3.22581	1.47593e-16	7363, 8630, 7365, 7364, 7367, 7366, 1583, 3284, 3283, 54490, 1577, 1312, 1576, 54578, 79799, 412, 54577, 54576, 1551, 54575, 54659, 54658, 54657, 54579, 3291, 8644, 6783, 3292, 1544, 1543, 54600, 1586, 10720	759	58	6879	5.15667	3.05311e-14	1.69117e-15	7.87165e-16
KEGG_PATHWAY	hsa05210:Colorectal cancer	35	3.42131	2.1058e-17	7046, 7048, 2353, 7040, 7042, 4292, 572, 595, 332, 596, 673, 1499, 5599, 836, 5294, 5594, 4087, 5595, 4088, 7157, 5894, 5290, 5291, 581, 5293, 2932, 324, 842, 207, 208, 5601, 4436, 5602, 5604, 3725	759	62	6879	5.11635	5.79096e-15	2.63225e-16	1.22519e-16
KEGG_PATHWAY	hsa05213:Endometrial cancer	28	2.73705	2.86545e-13	4292, 572, 595, 673, 1499, 1950, 2002, 999, 2309, 1956, 5294, 5594, 5595, 7157, 5894, 2064, 5290, 5291, 5170, 5293, 5728, 2932, 324, 842, 207, 208, 5604, 5605	759	52	6879	4.88021	7.88009e-11	2.07368e-12	9.65205e-13
KEGG_PATHWAY	hsa05204:Chemical carcinogenesis	43	4.20332	3.0171e-20	7363, 7365, 7364, 7367, 7366, 130, 131, 54490, 2944, 1558, 1557, 1577, 1576, 54578, 79799, 1553, 54577, 54576, 1551, 54575, 54659, 54658, 218, 54657, 54579, 1559, 220, 6818, 6817, 1544, 124, 1543, 54600, 125, 2950, 127, 128, 1562, 6799, 405, 5743, 1548, 10720	759	80	6879	4.87149	8.29701e-18	8.29701e-19	3.86188e-19
KEGG_PATHWAY	hsa05221:Acute myeloid leukemia	30	2.93255	4.05125e-14	4790, 6199, 6198, 6774, 572, 595, 3815, 673, 2322, 1978, 5914, 5294, 5371, 5594, 5595, 5970, 5894, 3551, 5290, 1050, 5291, 5292, 5293, 1147, 2475, 6777, 207, 208, 5604, 5605	759	56	6879	4.85531	1.11439e-11	3.48155e-13	1.6205e-13
KEGG_PATHWAY	hsa05215:Prostate cancer	47	4.59433	5.82631e-22	4790, 4792, 1385, 3480, 572, 595, 596, 673, 1017, 3479, 1499, 1950, 898, 5159, 3630, 2308, 1956, 5294, 5594, 5595, 5155, 5970, 5156, 7157, 5894, 7039, 3551, 2263, 2064, 5290, 2260, 5291, 5170, 5293, 5728, 2932, 1027, 1026, 367, 1147, 842, 2475, 207, 208, 5604, 5605, 5925	759	88	6879	4.84059	1.60224e-19	3.20447e-20	1.49154e-20
KEGG_PATHWAY	hsa00983:Drug metabolism - other enzymes	24	2.34604	4.70466e-11	7363, 7365, 7364, 7367, 7366, 7498, 1066, 54490, 54600, 1576, 54578, 79799, 54577, 54576, 54575, 54659, 8824, 54658, 54657, 1806, 978, 54579, 10720, 1548	759	46	6879	4.72865	1.29378e-08	2.39589e-10	1.11518e-10
KEGG_PATHWAY	hsa05216:Thyroid cancer	15	1.46628	5.49896e-07	5594, 6256, 5595, 7157, 6258, 6257, 4914, 595, 673, 1499, 999, 5468, 5604, 5605, 5979	759	29	6879	4.68788	0.00015121	1.82194e-06	8.48033e-07
KEGG_PATHWAY	hsa00980:Metabolism of xenobiotics by cytochrome P450	38	3.71457	4.58478e-17	7363, 7365, 7364, 7367, 7366, 130, 131, 54490, 2944, 1555, 1577, 1576, 54578, 79799, 1553, 54577, 29785, 54576, 54575, 54659, 54658, 218, 54657, 54579, 1559, 1572, 220, 1544, 124, 1543, 54600, 1565, 125, 2950, 127, 128, 1548, 10720	759	74	6879	4.6541	1.26081e-14	5.4818e-16	2.55153e-16
KEGG_PATHWAY	hsa04913:Ovarian steroidogenesis	25	2.44379	3.11199e-11	1583, 3284, 3283, 3480, 111, 112, 113, 3479, 114, 115, 2488, 1573, 3630, 8644, 240, 3292, 2778, 3949, 1543, 1586, 107, 108, 5743, 109, 196883	759	49	6879	4.6241	8.55797e-09	1.67804e-10	7.81049e-11
KEGG_PATHWAY	hsa04917:Prolactin signaling pathway	36	3.51906	6.8788e-16	8651, 4790, 6772, 6774, 2353, 2099, 9021, 595, 3717, 894, 1432, 5599, 3630, 2309, 3659, 5617, 5294, 5594, 5595, 5970, 5894, 2100, 5290, 5291, 5293, 2932, 1586, 6777, 207, 208, 5601, 5602, 6514, 5604, 6714, 5605	759	71	6879	4.59545	1.83187e-13	7.27565e-15	3.38648e-15
KEGG_PATHWAY	hsa04066:HIF-1 signaling pathway	48	4.69208	7.39711e-21	4790, 6199, 6198, 7422, 6774, 3162, 3480, 6194, 596, 3458, 3479, 1950, 2321, 5335, 3630, 5578, 7018, 5579, 4843, 1956, 4846, 1978, 5294, 7099, 3091, 5054, 5594, 5595, 5970, 2064, 5290, 5291, 284, 285, 5293, 3569, 54583, 1027, 1026, 2475, 6513, 207, 405, 1906, 208, 5604, 5209, 5605	759	96	6879	4.53162	2.03421e-18	2.90601e-19	1.35262e-19
KEGG_PATHWAY	hsa05220:Chronic myeloid leukemia	36	3.51906	1.11434e-15	7046, 4790, 25, 7048, 4792, 1021, 3066, 3065, 7040, 7042, 1019, 572, 595, 673, 598, 1399, 613, 5294, 5594, 5595, 5970, 7157, 5894, 3551, 5290, 5291, 5293, 1027, 1026, 1147, 6777, 207, 208, 5604, 5605, 5925	759	72	6879	4.53162	3.05311e-13	1.13498e-14	5.28282e-15
KEGG_PATHWAY	hsa04012:ErbB signaling pathway	42	4.10557	1.3789e-17	6199, 25, 6198, 27, 5062, 572, 673, 1950, 1399, 2002, 5335, 5599, 5578, 5579, 1956, 1978, 5294, 5594, 5595, 5058, 5894, 7039, 2066, 2065, 2064, 5290, 5291, 5293, 2932, 1027, 1026, 2475, 6777, 207, 208, 5601, 5602, 5604, 5747, 6714, 5605, 3725	759	87	6879	4.37536	3.79197e-15	1.89598e-16	8.82494e-17
KEGG_PATHWAY	hsa05142:Chagas disease (American trypanosomiasis)	50	4.88759	8.8499e-21	8772, 7046, 7048, 7124, 2353, 7040, 7042, 3558, 355, 356, 3553, 6347, 4843, 7099, 5594, 5595, 7097, 3569, 1147, 841, 51135, 207, 208, 4615, 3725, 4790, 4792, 3458, 1432, 3576, 5599, 3654, 5515, 5294, 5054, 4087, 4088, 5970, 3551, 5290, 23236, 5291, 5293, 2778, 2774, 3586, 107, 5601, 5602, 8837	759	104	6879	4.35733	2.43372e-18	3.04215e-19	1.41598e-19
KEGG_PATHWAY	hsa05214:Glioma	31	3.0303	7.36934e-13	1021, 3480, 1019, 595, 673, 3479, 1950, 5335, 5159, 5578, 5579, 1956, 5294, 5594, 5595, 5155, 5156, 7157, 5894, 7039, 5290, 5291, 5293, 5728, 1026, 2475, 207, 208, 5604, 5605, 5925	759	65	6879	4.32247	2.02666e-10	5.19633e-12	2.41865e-12
KEGG_PATHWAY	hsa05161:Hepatitis B	68	6.64712	2.00813e-27	8772, 7046, 7124, 2353, 1385, 1021, 7040, 7042, 1019, 3716, 595, 596, 1017, 355, 356, 317, 5578, 5579, 836, 7099, 5594, 5595, 5111, 7097, 29110, 3569, 1027, 1026, 1147, 841, 842, 843, 1386, 207, 208, 6714, 4615, 3725, 4790, 4792, 6772, 6774, 890, 572, 3339, 332, 3576, 898, 2002, 5599, 8900, 5294, 5970, 7157, 5894, 3551, 5290, 5291, 581, 5293, 5728, 6777, 5601, 5602, 5604, 4318, 5605, 5925	759	145	6879	4.25035	5.52236e-25	1.84079e-25	8.56802e-26
KEGG_PATHWAY	hsa04068:FoxO signaling pathway	62	6.06061	1.30206e-24	7046, 7048, 6794, 7040, 7042, 3480, 472, 10018, 595, 673, 1017, 3479, 356, 1454, 3630, 6502, 6789, 2309, 5934, 2308, 5594, 8743, 5595, 1030, 23411, 3569, 1027, 1026, 1147, 207, 208, 847, 5562, 5563, 6774, 894, 1950, 1432, 5599, 6446, 4303, 51701, 6648, 1956, 5294, 4087, 4088, 5894, 3551, 5290, 5291, 5170, 5293, 5728, 664, 3586, 5601, 5602, 3667, 5604, 5605, 1647	759	134	6879	4.19344	3.58067e-22	8.95166e-23	4.16659e-23
KEGG_PATHWAY	hsa00350:Tyrosine metabolism	16	1.56403	1.45744e-06	4282, 7299, 130, 131, 7173, 220, 124, 1312, 125, 127, 128, 316, 218, 4128, 4129, 8639	759	35	6879	4.1432	0.000400715	4.60684e-06	2.14427e-06
KEGG_PATHWAY	hsa05218:Melanoma	32	3.12805	1.91771e-12	3082, 4233, 1021, 3480, 8074, 1019, 572, 595, 673, 3479, 1950, 5159, 999, 1956, 5294, 5594, 5595, 5155, 5156, 7157, 5894, 5290, 2260, 5291, 5293, 5728, 1026, 207, 208, 5604, 5605, 5925	759	71	6879	4.08484	5.27364e-10	1.25564e-11	5.84446e-12
KEGG_PATHWAY	hsa05144:Malaria	22	2.15054	1.13398e-08	3082, 7099, 6383, 7057, 7059, 7058, 7124, 4035, 4233, 7060, 7040, 7042, 6382, 7097, 3569, 3458, 1311, 3576, 3553, 3586, 6347, 4615	759	49	6879	4.06921	3.11845e-06	4.45493e-08	2.07357e-08
KEGG_PATHWAY	hsa04914:Progesterone-mediated oocyte maturation	39	3.81232	5.69816e-15	5140, 6197, 6196, 5241, 9088, 3480, 6195, 890, 111, 673, 112, 1017, 113, 3479, 114, 1432, 995, 115, 5599, 3630, 8900, 5294, 5594, 5595, 5894, 5290, 5291, 5293, 27330, 983, 107, 207, 108, 208, 5601, 109, 5602, 5604, 196883	759	87	6879	4.06283	1.55709e-12	5.22332e-14	2.43122e-14
KEGG_PATHWAY	hsa04920:Adipocytokine signaling pathway	31	3.0303	7.87691e-12	4790, 6256, 4792, 5562, 6794, 7124, 4793, 5563, 5443, 5465, 6258, 6257, 6774, 9021, 3717, 10891, 5599, 3952, 32, 5970, 3551, 10645, 1147, 2475, 84254, 6513, 207, 208, 5601, 5602, 3667	759	70	6879	4.01372	2.16615e-09	4.51281e-11	2.10051e-11
KEGG_PATHWAY	hsa04930:Type II diabetes mellitus	21	2.05279	4.53728e-08	8651, 5580, 5294, 5594, 5595, 7124, 3551, 5290, 9021, 5291, 5293, 5590, 2475, 5313, 3630, 5599, 5601, 5315, 5602, 6514, 3667	759	48	6879	3.96517	1.24774e-05	1.66367e-07	7.74362e-08
KEGG_PATHWAY	hsa04931:Insulin resistance	47	4.59433	2.02075e-17	5580, 6197, 6196, 4790, 6199, 6198, 4792, 5562, 7124, 5563, 5465, 6774, 1385, 9021, 6195, 10891, 5599, 3630, 5834, 2308, 5836, 4846, 5837, 32, 5294, 7376, 10062, 5970, 6720, 3551, 5290, 5291, 5170, 5590, 5293, 5728, 27330, 2932, 3569, 2475, 6513, 207, 208, 5601, 5602, 6514, 3667	759	108	6879	3.94419	5.55707e-15	2.63225e-16	1.22519e-16
KEGG_PATHWAY	hsa04722:Neurotrophin signaling pathway	52	5.08309	3.90223e-19	6197, 5580, 6196, 5664, 7161, 6195, 673, 596, 356, 5335, 8767, 2309, 5594, 5595, 4145, 27330, 51135, 207, 208, 4215, 4217, 3725, 4790, 25, 4792, 4793, 572, 1432, 1399, 5599, 3654, 5294, 5970, 7157, 5894, 3551, 5290, 5291, 5170, 581, 5293, 4914, 5607, 4915, 2932, 4916, 5601, 5602, 627, 3667, 5604, 5605	759	120	6879	3.9274	1.07311e-16	7.15409e-18	3.3299e-18
KEGG_PATHWAY	hsa04115:p53 signaling pathway	29	2.8348	8.21235e-11	5268, 1021, 7161, 472, 1019, 595, 1017, 355, 894, 3479, 896, 898, 1111, 317, 637, 11200, 836, 7057, 5054, 7157, 581, 5728, 1026, 983, 841, 842, 545, 7249, 1647	759	67	6879	3.9229	2.25839e-08	4.10617e-10	1.91124e-10
KEGG_PATHWAY	hsa04660:T cell receptor signaling pathway	43	4.20332	1.16445e-15	4790, 4792, 7124, 4793, 7006, 2353, 5062, 1437, 1019, 3937, 3558, 3458, 1432, 5335, 7535, 5777, 10892, 3932, 5294, 5594, 5595, 5970, 5058, 5894, 6885, 3551, 5290, 5291, 5170, 5293, 2932, 2534, 3567, 1147, 940, 3565, 3586, 207, 208, 5604, 5605, 3702, 3725	759	100	6879	3.89719	3.05311e-13	1.14366e-14	5.3232e-15
KEGG_PATHWAY	hsa04923:Regulation of lipolysis in adipocytes	24	2.34604	6.1378e-09	5294, 5140, 4881, 5290, 5291, 5293, 154, 111, 2778, 134, 112, 113, 114, 115, 107, 3630, 5742, 108, 207, 5743, 109, 208, 3667, 196883	759	56	6879	3.88425	1.68789e-06	2.44622e-08	1.13861e-08
KEGG_PATHWAY	hsa00860:Porphyrin and chlorophyll metabolism	18	1.75953	7.73113e-07	7363, 7365, 7364, 7367, 7366, 3162, 54490, 54600, 54578, 79799, 54577, 54576, 54575, 54659, 54658, 54657, 54579, 10720	759	42	6879	3.88425	0.000212583	2.47216e-06	1.15068e-06
KEGG_PATHWAY	hsa04664:Fc epsilon RI signaling pathway	29	2.8348	1.25257e-10	6850, 7124, 1437, 3937, 695, 1432, 5335, 5599, 5578, 5579, 5294, 5594, 5595, 4067, 5894, 3596, 5290, 5291, 5170, 5293, 2534, 3567, 3565, 207, 208, 5601, 5602, 5604, 5605	759	68	6879	3.86521	3.44458e-08	6.15104e-10	2.86303e-10
KEGG_PATHWAY	hsa04370:VEGF signaling pathway	26	2.54154	1.40632e-09	7422, 572, 3315, 1432, 5335, 5578, 5579, 4846, 5294, 5594, 3791, 5595, 5894, 5290, 5291, 5293, 5829, 842, 207, 5743, 208, 8877, 5604, 5747, 6714, 5605	759	61	6879	3.86302	3.86737e-07	6.13868e-09	2.85728e-09
KEGG_PATHWAY	hsa05162:Measles	56	5.4741	7.07301e-20	1021, 7161, 1459, 1019, 3716, 595, 3559, 3717, 1457, 3558, 1017, 3718, 355, 356, 3553, 5610, 7297, 7099, 8743, 6885, 7097, 29110, 3569, 1027, 1147, 51135, 3565, 207, 208, 4615, 8795, 4790, 4792, 4793, 6772, 8797, 6774, 3458, 894, 896, 898, 3654, 5294, 5970, 7157, 3596, 5290, 5291, 9451, 5293, 1965, 2932, 2534, 3303, 940, 6777	759	133	6879	3.8161	1.94508e-17	1.76825e-18	8.23041e-19
KEGG_PATHWAY	hsa04668:TNF signaling pathway	45	4.39883	6.06529e-16	8772, 4790, 4792, 7124, 1385, 2353, 9021, 330, 1437, 355, 1432, 3553, 5599, 6347, 836, 5294, 5594, 5595, 5970, 6885, 3551, 1051, 5290, 5291, 5293, 3726, 3569, 840, 1147, 841, 843, 1386, 2919, 207, 5743, 1906, 208, 5601, 5602, 4217, 5604, 8837, 4318, 3725, 3627	759	107	6879	3.81164	1.52656e-13	6.67182e-15	3.10543e-15
KEGG_PATHWAY	hsa04152:AMPK signaling pathway	51	4.98534	8.48396e-18	6199, 6198, 6794, 1385, 3480, 595, 3479, 10891, 3630, 5214, 1938, 3952, 2309, 2308, 1978, 6720, 6885, 23411, 3172, 2475, 207, 7249, 5468, 208, 1080, 5562, 5563, 890, 2203, 57521, 8789, 6009, 8900, 5515, 32, 5294, 5210, 5211, 5213, 3156, 5290, 5291, 5170, 5293, 10645, 84254, 3667, 5207, 5208, 5528, 5209	759	123	6879	3.75793	2.33309e-15	1.22794e-16	5.71551e-17
KEGG_PATHWAY	hsa05222:Small cell lung cancer	35	3.42131	3.36804e-12	4790, 6256, 4792, 6258, 6257, 1021, 330, 5915, 1019, 595, 596, 1017, 598, 898, 6502, 317, 4843, 5294, 5970, 7157, 3551, 1030, 5290, 5291, 5293, 5728, 1027, 2335, 1147, 842, 207, 5743, 208, 5747, 5925	759	85	6879	3.73192	9.26223e-10	1.97066e-11	9.17254e-12
KEGG_PATHWAY	hsa04960:Aldosterone-regulated sodium reabsorption	16	1.56403	7.37952e-06	5294, 3291, 5594, 5595, 5290, 5291, 5170, 5293, 486, 3479, 3630, 5578, 6446, 5579, 3667, 4306	759	39	6879	3.71825	0.00202732	2.04987e-05	9.54119e-06
KEGG_PATHWAY	hsa05211:Renal cell carcinoma	27	2.6393	1.82972e-09	3082, 7422, 4233, 7040, 7042, 5062, 673, 1399, 5294, 3091, 5594, 5595, 5155, 5058, 5894, 7039, 5290, 5291, 5293, 54583, 6513, 207, 405, 208, 5604, 5605, 3725	759	66	6879	3.70769	5.03173e-07	7.62384e-09	3.54855e-09
KEGG_PATHWAY	hsa04977:Vitamin digestion and absorption	9	0.879765	0.00163187	5948, 158835, 4363, 9227, 335, 337, 338, 151056, 5406	759	22	6879	3.70769	0.361818	0.00359012	0.00167104
KEGG_PATHWAY	hsa05140:Leishmaniasis	29	2.8348	4.18971e-10	4790, 4792, 7124, 6772, 4793, 2353, 7040, 7042, 3716, 3717, 3458, 1432, 2002, 3553, 3654, 5777, 4843, 7099, 5594, 5595, 5970, 6885, 7097, 3565, 51135, 3586, 5743, 4615, 3725	759	71	6879	3.70189	1.15217e-07	1.9865e-09	9.24627e-10
KEGG_PATHWAY	hsa00051:Fructose and mannose metabolism	13	1.27077	8.18813e-05	7264, 5210, 5211, 5213, 231, 2203, 57103, 57016, 5214, 8789, 5207, 5208, 5209	759	32	6879	3.68194	0.0222666	0.000208494	9.70445e-05
KEGG_PATHWAY	hsa04621:NOD-like receptor signaling pathway	22	2.15054	1.83961e-07	4790, 5594, 4792, 5595, 5970, 7124, 4793, 6885, 3551, 330, 3569, 1147, 841, 1432, 3576, 3553, 2919, 5599, 6347, 5601, 8767, 5602	759	56	6879	3.56056	5.0588e-05	6.24559e-07	2.90704e-07
KEGG_PATHWAY	hsa05145:Toxoplasmosis	43	4.20332	6.10687e-14	8651, 4790, 4792, 7124, 6772, 4793, 6774, 7040, 7042, 330, 572, 3716, 3717, 596, 3458, 598, 1432, 5599, 3654, 836, 4843, 7297, 7099, 5594, 5595, 5970, 6885, 3551, 5170, 240, 7097, 3949, 3303, 1147, 841, 842, 51135, 3586, 207, 208, 5601, 5602, 4615	759	110	6879	3.5429	1.67921e-11	5.0281e-13	2.34035e-13
KEGG_PATHWAY	hsa04919:Thyroid hormone signaling pathway	44	4.30108	7.22685e-14	6256, 6772, 6258, 6257, 2099, 3066, 3065, 1734, 572, 595, 1499, 5335, 5578, 5579, 6009, 2308, 5294, 3091, 5594, 5595, 7157, 5894, 8202, 8841, 9611, 23236, 5290, 5291, 5170, 5293, 2932, 486, 842, 2475, 6513, 4851, 207, 7249, 208, 60, 5208, 5604, 6714, 5605	759	115	6879	3.46767	1.98758e-11	5.67824e-13	2.64296e-13
KEGG_PATHWAY	hsa04915:Estrogen signaling pathway	37	3.61681	2.11059e-11	5580, 1385, 2353, 2099, 111, 112, 113, 114, 115, 2288, 6667, 1956, 4846, 5294, 5594, 5595, 5894, 2100, 23236, 5290, 5291, 5293, 2778, 3303, 1386, 107, 207, 4313, 108, 208, 109, 5604, 6714, 4318, 5605, 3725, 196883	759	99	6879	3.38727	5.80412e-09	1.16083e-10	5.40312e-11
KEGG_PATHWAY	hsa05030:Cocaine addiction	18	1.75953	9.34959e-06	4790, 5970, 1385, 1020, 111, 2778, 116443, 1386, 2354, 2906, 4128, 627, 4129, 2903, 2913, 2902, 2912, 3725	759	49	6879	3.32935	0.00256785	2.57114e-05	1.19675e-05
KEGG_PATHWAY	hsa05143:African trypanosomiasis	12	1.17302	0.000532992	3569, 3458, 355, 356, 7124, 335, 3553, 3586, 5578, 5579, 23236, 4615	759	33	6879	3.29572	0.136371	0.00121135	0.000563827
KEGG_PATHWAY	hsa04662:B cell receptor signaling pathway	25	2.44379	1.3048e-07	4790, 6850, 4792, 4793, 2353, 695, 5777, 10892, 5294, 5594, 5595, 5970, 4067, 5894, 3551, 5290, 5291, 5293, 2932, 1147, 207, 208, 5604, 5605, 3725	759	69	6879	3.28378	3.58812e-05	4.48524e-07	2.08767e-07
KEGG_PATHWAY	hsa04976:Bile secretion	25	2.44379	1.3048e-07	1080, 6256, 5243, 570, 111, 112, 113, 114, 115, 8647, 10257, 9971, 3156, 6580, 2778, 760, 486, 3949, 8714, 9429, 107, 6513, 108, 109, 196883	759	69	6879	3.28378	3.58812e-05	4.48524e-07	2.08767e-07
KEGG_PATHWAY	hsa04910:Insulin signaling pathway	49	4.78983	6.21656e-14	5261, 5140, 8651, 6199, 6198, 9021, 5260, 6194, 673, 10891, 3630, 2308, 1978, 5594, 5595, 6720, 5590, 2475, 207, 7249, 208, 5562, 5563, 572, 2203, 1399, 57521, 2002, 5313, 5599, 8789, 6009, 5834, 5836, 32, 5837, 5294, 5894, 3551, 5290, 5291, 5170, 5293, 2932, 5601, 5602, 3667, 5604, 5605	759	138	6879	3.21811	1.70974e-11	5.0281e-13	2.34035e-13
KEGG_PATHWAY	hsa00360:Phenylalanine metabolism	6	0.58651	0.0321192	4282, 220, 218, 4128, 4129, 8639	759	17	6879	3.19879	0.999874	0.0581104	0.0321192
KEGG_PATHWAY	hsa05134:Legionellosis	19	1.85728	9.72996e-06	7099, 4790, 4792, 5970, 7124, 3297, 7097, 3569, 3303, 840, 664, 841, 842, 3576, 3553, 2919, 317, 836, 4615	759	54	6879	3.18892	0.00267218	2.62327e-05	1.22101e-05
KEGG_PATHWAY	hsa05205:Proteoglycans in cancer	70	6.84262	1.88403e-19	3082, 6199, 6198, 7124, 7040, 3481, 7042, 3480, 6194, 595, 673, 355, 3479, 1499, 356, 5335, 5578, 5777, 5579, 836, 7099, 7057, 3091, 9475, 5594, 5595, 7097, 5829, 27250, 1026, 2475, 79923, 207, 2719, 60, 208, 6714, 5747, 7422, 4233, 6774, 2099, 3339, 1432, 2002, 857, 1956, 5294, 6383, 6385, 3791, 7157, 5894, 5058, 2066, 2065, 2064, 5290, 5291, 5170, 2260, 6382, 5293, 2335, 4313, 2817, 5328, 5604,…	759	200	6879	3.17213	5.18109e-17	3.70078e-18	1.72254e-18
KEGG_PATHWAY	hsa05160:Hepatitis C	46	4.49658	1.19451e-12	4790, 6256, 4792, 7124, 6772, 5465, 6774, 9021, 572, 3716, 673, 1950, 1432, 9080, 3576, 5599, 5610, 5515, 1956, 3659, 7297, 5294, 5594, 10062, 5595, 5970, 7157, 5894, 3551, 5290, 5291, 9451, 5170, 6041, 9074, 5293, 1965, 2932, 29110, 3949, 1026, 1147, 207, 208, 5601, 5602	759	133	6879	3.13465	3.28484e-10	8.21228e-12	3.82244e-12
KEGG_PATHWAY	hsa04064:NF-kappa B signaling pathway	30	2.93255	1.925e-08	4790, 6850, 4792, 7124, 472, 330, 1459, 596, 1457, 695, 598, 3576, 3553, 5335, 7535, 3654, 10892, 3932, 7099, 5970, 4067, 6387, 6885, 3551, 1147, 51135, 5743, 5328, 8837, 4615	759	87	6879	3.12526	5.29373e-06	7.25171e-08	3.37534e-08
KEGG_PATHWAY	hsa00591:Linoleic acid metabolism	10	0.977517	0.00298002	1558, 1557, 1544, 246, 5320, 1576, 1573, 151056, 30814, 1559	759	29	6879	3.12526	0.55989	0.00625578	0.00298002
KEGG_PATHWAY	hsa05321:Inflammatory bowel disease (IBD)	22	2.15054	2.37466e-06	7099, 6097, 4790, 4087, 4088, 5970, 6772, 7124, 6774, 3596, 7040, 7042, 7097, 6095, 3558, 3569, 3458, 3567, 3565, 3553, 3586, 3725	759	64	6879	3.11549	0.000652818	6.94714e-06	3.23358e-06
KEGG_PATHWAY	hsa04380:Osteoclast differentiation	45	4.39883	2.85687e-12	8651, 7046, 4790, 6850, 7048, 4792, 7124, 6772, 7006, 1385, 2353, 7040, 9021, 7042, 3716, 1436, 3937, 695, 3458, 1432, 3553, 5599, 3932, 7297, 5294, 5594, 5595, 5970, 6885, 3551, 5290, 5291, 5293, 3726, 3727, 2534, 1147, 2354, 207, 5468, 208, 5601, 5602, 5604, 3725	759	131	6879	3.11333	7.85627e-10	1.70791e-11	7.94956e-12
KEGG_PATHWAY	hsa05200:Pathways in cancer	134	13.0987	2.92061e-36	3082, 8772, 7046, 7048, 11186, 7040, 7042, 3480, 4292, 1612, 595, 111, 596, 112, 355, 113, 598, 356, 114, 3479, 115, 6502, 999, 637, 4843, 2308, 3091, 9475, 5155, 5156, 367, 2950, 6513, 405, 25, 6256, 6772, 6258, 4233, 6257, 6774, 3815, 2322, 898, 5159, 5294, 4087, 4088, 5970, 6387, 3551, 2064, 5290, 5291, 5293, 4914, 5728, 2735, 2335, 6777, 5601, 5602, 5604, 5605, 2353, 1021, 1019, 3716, 673, 10…	759	393	6879	3.09027	8.03169e-34	4.01584e-34	1.86919e-34
KEGG_PATHWAY	hsa04540:Gap junction	30	2.93255	2.57616e-08	111, 112, 113, 1950, 114, 2983, 115, 2982, 1453, 5159, 5578, 5579, 1956, 5594, 5595, 5155, 5156, 5894, 23236, 5607, 2778, 983, 107, 108, 109, 2915, 5604, 6714, 5605, 196883	759	88	6879	3.08974	7.08441e-06	9.57356e-08	4.45606e-08
KEGG_PATHWAY	hsa05032:Morphine addiction	31	3.0303	1.46324e-08	5140, 5142, 5143, 5144, 2870, 2570, 2569, 111, 134, 112, 113, 114, 115, 2564, 2563, 5578, 5138, 5579, 2868, 5151, 2561, 2560, 5150, 2778, 2558, 2555, 2554, 107, 108, 109, 196883	759	91	6879	3.08748	4.0239e-06	5.66747e-08	2.63795e-08
KEGG_PATHWAY	hsa04620:Toll-like receptor signaling pathway	36	3.51906	8.62037e-10	8772, 4790, 4792, 7124, 6772, 2353, 1432, 3576, 3553, 5599, 3654, 5294, 7099, 5594, 5595, 5970, 6885, 3551, 5290, 5291, 7097, 5293, 3569, 29110, 1147, 841, 51135, 207, 208, 5601, 5602, 5604, 4615, 5605, 3725, 3627	759	106	6879	3.07808	2.3706e-07	3.951e-09	1.83901e-09
KEGG_PATHWAY	hsa05231:Choline metabolism in cancer	34	3.32356	3.56823e-09	6199, 6198, 2353, 1950, 6667, 5335, 5599, 5159, 5578, 5579, 6009, 1956, 1978, 5294, 3091, 5594, 5595, 5155, 5156, 5894, 5290, 5291, 5170, 6580, 5293, 2475, 207, 7249, 208, 5601, 5602, 5604, 5605, 3725	759	101	6879	3.05099	9.81263e-07	1.46457e-08	6.81692e-09
KEGG_PATHWAY	hsa05133:Pertussis	25	2.44379	7.63202e-07	4790, 6374, 7124, 2353, 1432, 3576, 3553, 5599, 3654, 836, 4843, 3659, 7099, 5594, 5595, 5970, 3569, 840, 51135, 3586, 5601, 5602, 727, 4615, 3725	759	75	6879	3.02108	0.000209859	2.46918e-06	1.14929e-06
KEGG_PATHWAY	hsa04912:GnRH signaling pathway	30	2.93255	5.9776e-08	5580, 111, 112, 113, 114, 1432, 115, 2488, 2002, 5599, 5578, 5579, 1956, 5594, 5595, 5894, 23236, 2778, 107, 4313, 108, 5601, 109, 4215, 5602, 5604, 6714, 5605, 3725, 196883	759	91	6879	2.98788	1.64383e-05	2.13486e-07	9.93679e-08
KEGG_PATHWAY	hsa00590:Arachidonic acid metabolism	20	1.95503	1.67668e-05	8644, 5320, 4056, 27306, 240, 1558, 1557, 2877, 2876, 1555, 246, 247, 1573, 5742, 239, 4048, 5743, 151056, 30814, 1559	759	61	6879	2.97155	0.00460028	4.43352e-05	2.0636e-05
KEGG_PATHWAY	hsa04071:Sphingolipid signaling pathway	39	3.81232	6.37287e-10	4790, 7124, 134, 596, 1432, 5599, 5578, 5579, 637, 5515, 4846, 5294, 9475, 5594, 4363, 5595, 5970, 7157, 5894, 23236, 5290, 140, 5291, 5170, 581, 5590, 5293, 5728, 2534, 207, 208, 5601, 1509, 8877, 5602, 4217, 5604, 5528, 5605	759	120	6879	2.94555	1.75254e-07	2.97041e-09	1.38259e-09
KEGG_PATHWAY	hsa05033:Nicotine addiction	13	1.27077	0.000881919	2561, 2560, 2570, 2569, 2558, 116443, 2555, 2554, 2564, 2563, 2906, 2903, 2902	759	40	6879	2.94555	0.215442	0.00197177	0.000917769
KEGG_PATHWAY	hsa04520:Adherens junction	23	2.24829	4.02092e-06	7046, 4087, 5594, 7048, 4088, 5595, 6885, 4233, 2064, 2260, 3480, 1459, 1457, 2534, 1499, 7525, 999, 5777, 60, 51701, 6615, 6714, 1956	759	71	6879	2.93598	0.00110514	1.15183e-05	5.36123e-06
KEGG_PATHWAY	hsa05020:Prion diseases	11	1.07527	0.00276299	3569, 2534, 5594, 5595, 3553, 2002, 4851, 727, 5604, 581, 5605	759	34	6879	2.93223	0.532743	0.0058901	0.00276299
KEGG_PATHWAY	hsa00410:beta-Alanine metabolism	10	0.977517	0.00490475	220, 34, 26275, 18, 54498, 6611, 218, 1806, 6723, 8639	759	31	6879	2.92363	0.74131	0.0100657	0.00490475
KEGG_PATHWAY	hsa05014:Amyotrophic lateral sclerosis (ALS)	16	1.56403	0.000206538	7124, 7157, 581, 572, 596, 598, 1432, 842, 317, 2906, 637, 836, 847, 4217, 2903, 2902	759	50	6879	2.90024	0.0552206	0.000493896	0.000229886
KEGG_PATHWAY	hsa05169:Epstein-Barr virus infection	39	3.81232	1.08589e-09	4790, 6850, 4792, 4793, 6774, 3066, 3065, 890, 3716, 596, 1017, 3718, 1432, 5599, 6502, 5610, 3654, 8900, 2208, 7297, 5294, 5970, 4067, 7157, 6885, 3551, 5290, 5291, 5293, 29110, 1027, 1026, 1147, 207, 208, 5601, 5602, 3725, 5925	759	122	6879	2.89727	2.98619e-07	4.81643e-09	2.24183e-09
KEGG_PATHWAY	hsa04062:Chemokine signaling pathway	59	5.76735	3.54951e-14	5580, 58191, 9547, 6356, 2870, 111, 3717, 673, 112, 3718, 113, 114, 2268, 115, 6347, 2309, 2868, 9475, 131890, 5594, 5595, 4067, 3055, 5590, 5829, 1147, 2919, 207, 208, 6714, 5747, 196883, 4790, 6374, 4792, 4793, 6772, 6774, 1399, 3576, 5294, 5970, 6387, 5894, 5058, 3551, 5290, 23236, 5291, 5293, 2932, 2931, 107, 6777, 108, 109, 5604, 3702, 3627	759	186	6879	2.8749	9.76996e-12	3.14876e-13	1.4656e-13
KEGG_PATHWAY	hsa04110:Cell cycle	39	3.81232	1.82328e-09	25, 7465, 1021, 3066, 3065, 7040, 9088, 7042, 472, 890, 1019, 595, 1017, 894, 896, 494551, 995, 898, 1111, 6502, 11200, 8900, 5934, 5591, 8243, 4087, 5111, 4088, 7157, 1030, 7272, 2932, 1027, 1026, 983, 545, 902, 5925, 1647	759	124	6879	2.85054	5.01401e-07	7.62384e-09	3.54855e-09
KEGG_PATHWAY	hsa04015:Rap1 signaling pathway	66	6.45161	1.37074e-15	3082, 5587, 23683, 3480, 111, 673, 112, 113, 3479, 1499, 114, 115, 3630, 5335, 5578, 999, 5579, 2903, 2902, 7057, 5594, 5155, 5595, 5156, 284, 285, 5590, 5909, 207, 60, 208, 7408, 6714, 196883, 7422, 4233, 8074, 1436, 3815, 3937, 135, 136, 2324, 1950, 1432, 1399, 2321, 5159, 1956, 5294, 3791, 5894, 2263, 5290, 23236, 2261, 5291, 2260, 5293, 2778, 107, 108, 109, 1969, 5604, 5605	759	210	6879	2.84845	3.66374e-13	1.29984e-14	6.05014e-15
KEGG_PATHWAY	hsa04932:Non-alcoholic fatty liver disease (NAFLD)	47	4.59433	4.29698e-11	4790, 4296, 6256, 5562, 7124, 5563, 5465, 7040, 9021, 10018, 355, 356, 3576, 3553, 5313, 5599, 3630, 637, 836, 3952, 2081, 5294, 7494, 10062, 5970, 6720, 6389, 3551, 5290, 1050, 5291, 9451, 581, 5293, 1965, 2932, 3569, 2931, 840, 841, 207, 208, 5601, 5602, 3667, 4217, 3725	759	151	6879	2.82101	1.18167e-08	2.22957e-10	1.03776e-10
KEGG_PATHWAY	hsa05164:Influenza A	54	5.27859	1.34874e-12	7124, 9021, 3716, 3717, 355, 356, 3553, 5610, 5578, 6347, 5579, 7297, 7099, 5594, 8743, 5595, 6041, 29110, 3569, 51135, 842, 1386, 207, 60, 208, 4615, 3725, 8795, 4790, 4792, 4793, 6772, 8797, 3458, 1432, 3576, 5599, 5294, 5371, 5970, 5894, 3551, 5290, 5291, 9451, 5293, 1965, 2932, 3303, 5601, 5602, 5604, 5605, 3627	759	174	6879	2.81273	3.70892e-10	9.0464e-12	4.21069e-12
KEGG_PATHWAY	hsa00030:Pentose phosphate pathway	9	0.879765	0.0109182	2821, 2203, 5211, 5213, 5214, 5226, 8789, 64080, 2539	759	29	6879	2.81273	0.95115	0.0212943	0.0109182
KEGG_PATHWAY	hsa04666:Fc gamma R-mediated phagocytosis	26	2.54154	2.04828e-06	5580, 6199, 6198, 6850, 4651, 1399, 5335, 5578, 5579, 5294, 5594, 5595, 4067, 5058, 5894, 3055, 5290, 5291, 5293, 207, 208, 3984, 8877, 3985, 7408, 5604	759	84	6879	2.80529	0.000563118	6.12607e-06	2.85141e-06
KEGG_PATHWAY	hsa04726:Serotonergic synapse	34	3.32356	4.93562e-08	260293, 3362, 351, 1558, 1557, 111, 673, 3359, 3355, 1573, 239, 5578, 5579, 836, 4128, 4129, 1559, 5594, 5595, 5894, 3354, 2561, 2560, 3351, 23236, 240, 2778, 1565, 246, 247, 1562, 5742, 5743, 5604	759	111	6879	2.77613	1.35729e-05	1.78592e-07	8.31263e-08
KEGG_PATHWAY	hsa04750:Inflammatory mediator regulation of TRP channels	30	2.93255	3.58968e-07	5580, 111, 112, 113, 3479, 114, 1432, 115, 3553, 1573, 5335, 5599, 239, 5578, 5579, 5294, 23236, 5290, 5291, 5293, 4914, 2778, 3269, 107, 108, 5601, 109, 5602, 6714, 196883	759	98	6879	2.77446	9.87115e-05	1.20386e-06	5.60341e-07
KEGG_PATHWAY	hsa04510:Focal adhesion	62	6.06061	1.0352e-13	3082, 3480, 5062, 595, 673, 596, 3479, 1499, 5578, 5579, 7057, 9475, 5594, 7059, 5155, 5595, 7058, 5156, 5829, 85366, 207, 60, 208, 7408, 6714, 5747, 3725, 7422, 4233, 7060, 572, 330, 894, 2324, 1950, 896, 1311, 1399, 1278, 2321, 2002, 5159, 5599, 857, 1956, 5294, 3791, 5894, 5058, 2064, 5290, 5291, 5170, 5293, 5728, 2932, 2534, 2335, 5601, 5602, 5604, 4638	759	206	6879	2.72777	2.8455e-11	7.90781e-13	3.68072e-13
KEGG_PATHWAY	hsa04918:Thyroid hormone synthesis	21	2.05279	4.14032e-05	4036, 1385, 23236, 7173, 111, 2778, 2877, 486, 112, 2876, 113, 114, 115, 1386, 107, 5578, 108, 5579, 109, 2936, 196883	759	70	6879	2.71897	0.0113215	0.000108437	5.04724e-05
KEGG_PATHWAY	hsa04350:TGF-beta signaling pathway	25	2.44379	7.20025e-06	7046, 6199, 6198, 7048, 7124, 130399, 4090, 7040, 7042, 4093, 3458, 655, 90, 6667, 91, 658, 92, 5515, 7057, 4086, 5594, 4087, 5595, 4088, 1030	759	84	6879	2.69739	0.00197812	2.02048e-05	9.4044e-06
KEGG_PATHWAY	hsa05131:Shigellosis	19	1.85728	0.000124539	4790, 9475, 25, 5594, 4792, 5595, 5970, 4793, 3551, 1147, 1399, 1432, 3576, 5599, 5601, 60, 8767, 5602, 6714	759	64	6879	2.69065	0.0336704	0.000311347	0.000144918
KEGG_PATHWAY	hsa04925:Aldosterone synthesis and secretion	24	2.34604	1.24728e-05	4881, 5587, 23683, 1385, 1583, 23236, 3284, 3283, 111, 2778, 112, 3949, 113, 114, 466, 115, 1386, 107, 5578, 108, 5138, 5579, 109, 196883	759	81	6879	2.6854	0.00342417	3.33012e-05	1.55002e-05
KEGG_PATHWAY	hsa05202:Transcriptional misregulation in cancer	49	4.78983	1.55577e-10	7048, 2078, 8290, 3480, 472, 3479, 598, 84444, 6667, 2308, 8864, 2118, 3569, 1027, 1026, 3248, 1025, 5468, 7403, 5747, 4790, 6495, 6256, 4353, 4233, 6258, 6257, 3066, 3065, 1437, 1436, 894, 55589, 2322, 3576, 2321, 5914, 5371, 4086, 5970, 7157, 9611, 1051, 1050, 4914, 466, 5327, 5328, 4318	759	167	6879	2.65927	4.27838e-08	7.50593e-10	3.49367e-10
KEGG_PATHWAY	hsa04024:cAMP signaling pathway	58	5.6696	2.55562e-12	5140, 5142, 5143, 5144, 6751, 5465, 2353, 1385, 3362, 154, 111, 673, 112, 113, 114, 115, 3355, 2906, 10257, 2903, 2902, 9475, 5594, 5595, 486, 116443, 207, 208, 3725, 196883, 1080, 4790, 4792, 572, 134, 135, 2488, 5599, 5294, 4881, 5970, 5894, 5058, 3354, 3351, 5290, 5291, 5293, 2735, 2778, 107, 108, 5601, 109, 5602, 627, 5604, 5605	759	198	6879	2.65489	7.02796e-10	1.56973e-11	7.30636e-12
KEGG_PATHWAY	hsa04710:Circadian rhythm	9	0.879765	0.0164745	6097, 8864, 5562, 5563, 1454, 1453, 1385, 6096, 6095	759	31	6879	2.63126	0.989623	0.0314616	0.0164745
KEGG_PATHWAY	hsa04720:Long-term potentiation	19	1.85728	0.000191458	6197, 6196, 5594, 5595, 5894, 23236, 6195, 27330, 673, 114, 107, 5578, 5579, 2906, 2915, 5604, 2903, 5605, 2902	759	66	6879	2.60911	0.0512936	0.00046185	0.00021497
KEGG_PATHWAY	hsa04723:Retrograde endocannabinoid signaling	29	2.8348	2.4329e-06	2570, 2569, 111, 112, 113, 114, 1432, 115, 2564, 2563, 5599, 5578, 5579, 5594, 5595, 2561, 2560, 23236, 2558, 2555, 2554, 107, 108, 5743, 5601, 109, 5602, 2915, 196883	759	101	6879	2.60232	0.000668824	7.0426e-06	3.27801e-06
KEGG_PATHWAY	hsa04151:PI3K-Akt signaling pathway	99	9.67742	2.96798e-20	3082, 6199, 6198, 4170, 3480, 6194, 10018, 595, 596, 598, 356, 3479, 3630, 2309, 5934, 1978, 4846, 7057, 5155, 7059, 5156, 7058, 6256, 5562, 5563, 4233, 7060, 3815, 894, 2324, 896, 57521, 2321, 898, 5159, 6009, 5294, 3791, 5970, 3551, 5290, 5170, 5291, 5293, 5728, 2335, 3667, 5604, 5605, 6794, 1385, 1021, 1019, 3716, 3559, 3717, 3558, 1017, 3718, 5578, 5617, 7099, 5594, 5595, 284, 7097, 285, 3569…	759	345	6879	2.60076	8.16193e-18	8.29701e-19	3.86188e-19
KEGG_PATHWAY	hsa04611:Platelet activation	37	3.61681	9.19971e-08	6850, 111, 3937, 112, 695, 113, 114, 1432, 2983, 115, 1278, 2982, 4846, 5294, 9475, 5594, 5595, 4067, 23236, 5290, 5291, 5590, 5293, 2778, 2534, 107, 5742, 85366, 207, 108, 208, 109, 60, 7408, 6714, 196883, 4638	759	130	6879	2.57954	2.52989e-05	3.24349e-07	1.5097e-07
KEGG_PATHWAY	hsa05120:Epithelial cell signaling in Helicobacter pylori infection	19	1.85728	0.0002354	4790, 4792, 4067, 5970, 5058, 4233, 3551, 1445, 1147, 1432, 3576, 5335, 5599, 5601, 5602, 836, 6714, 1956, 3725	759	67	6879	2.57017	0.0626914	0.000558061	0.000259752
KEGG_PATHWAY	hsa04730:Long-term depression	17	1.66178	0.000565546	5594, 5595, 4067, 5894, 23236, 6261, 3480, 2778, 673, 3479, 2983, 2982, 5578, 5579, 5515, 5604, 5605	759	60	6879	2.56792	0.144072	0.0012748	0.00059336
KEGG_PATHWAY	hsa04921:Oxytocin signaling pathway	42	4.10557	1.75559e-08	5562, 5563, 2353, 595, 111, 112, 113, 114, 2983, 115, 2982, 2002, 5578, 5579, 1938, 1956, 4846, 9475, 5594, 5595, 4881, 5894, 4882, 23236, 6261, 5607, 10645, 2778, 1026, 84254, 107, 85366, 108, 5743, 109, 60, 5604, 6714, 5605, 3725, 196883, 4638	759	150	6879	2.53771	4.82786e-06	6.70538e-08	3.12105e-08
KEGG_PATHWAY	hsa04114:Oocyte meiosis	31	3.0303	1.91112e-06	6197, 6790, 6196, 5241, 9088, 3480, 6195, 111, 112, 1017, 113, 3479, 114, 995, 115, 898, 3630, 5515, 5594, 8243, 5595, 27330, 983, 367, 9748, 107, 108, 109, 5604, 5528, 196883	759	111	6879	2.53118	0.000525422	5.90516e-06	2.74858e-06
KEGG_PATHWAY	hsa05203:Viral carcinogenesis	57	5.57185	4.02058e-11	1385, 1021, 1019, 3716, 595, 1017, 3718, 51564, 6502, 5610, 10013, 836, 10014, 5934, 5594, 5595, 4067, 1030, 79885, 5829, 1027, 1026, 841, 1386, 121504, 6714, 3725, 4790, 4792, 6850, 6774, 3066, 3065, 890, 572, 83933, 894, 896, 578, 898, 1111, 9759, 55869, 5315, 8900, 5294, 9734, 5970, 7157, 8841, 5290, 5291, 581, 5293, 983, 6777, 5925	759	205	6879	2.52002	1.10566e-08	2.12627e-10	9.89682e-11
KEGG_PATHWAY	hsa04014:Ras signaling pathway	62	6.06061	9.03693e-12	3082, 11186, 3480, 5062, 3479, 598, 356, 3630, 5335, 5578, 5579, 6789, 2903, 2902, 5594, 5155, 5595, 5156, 284, 285, 29110, 1147, 207, 208, 30814, 4790, 25, 5320, 7422, 27, 4233, 8074, 572, 1436, 3815, 2324, 1950, 2321, 2002, 5159, 5599, 7535, 4303, 1956, 5294, 3791, 5970, 5894, 9610, 5058, 3551, 2263, 5290, 2261, 5291, 2260, 5293, 5601, 5602, 1969, 5604, 5605	759	226	6879	2.48638	2.48514e-09	5.07175e-11	2.36067e-11
KEGG_PATHWAY	hsa05146:Amoebiasis	29	2.8348	6.80061e-06	4790, 7124, 7040, 7042, 1437, 3458, 3315, 1278, 3576, 3553, 5578, 5579, 836, 4843, 5294, 7099, 5970, 23236, 5290, 5291, 7097, 5293, 2778, 3569, 2335, 2774, 3586, 107, 5747	759	106	6879	2.47957	0.00186843	1.92801e-05	8.974e-06
KEGG_PATHWAY	hsa04270:Vascular smooth muscle contraction	32	3.12805	2.04945e-06	5580, 5320, 111, 673, 112, 135, 113, 136, 114, 2983, 115, 2982, 5578, 5579, 9475, 5594, 5595, 59, 4881, 5894, 4882, 23236, 2778, 107, 85366, 108, 109, 30814, 5604, 5605, 196883, 4638	759	117	6879	2.47884	0.00056344	6.12607e-06	2.85141e-06
KEGG_PATHWAY	hsa04622:RIG-I-like receptor signaling pathway	19	1.85728	0.000424042	8772, 4790, 4792, 5970, 7124, 4793, 6885, 5300, 3551, 29110, 1147, 841, 1432, 3576, 843, 5599, 5601, 5602, 3627	759	70	6879	2.46002	0.110091	0.000979928	0.000456112
KEGG_PATHWAY	hsa05152:Tuberculosis	48	4.69208	4.32908e-09	8772, 4790, 6850, 7124, 6772, 7421, 5289, 1385, 7040, 7042, 572, 3716, 3717, 596, 3458, 1432, 3313, 3553, 5599, 317, 3654, 637, 8767, 836, 10892, 4843, 7099, 5594, 5595, 5970, 5894, 1051, 581, 7097, 3569, 841, 842, 51135, 3586, 843, 207, 208, 5601, 1509, 8877, 5602, 6714, 4615	759	177	6879	2.45783	1.1905e-06	1.75073e-08	8.14886e-09
KEGG_PATHWAY	hsa04650:Natural killer cell mediated cytotoxicity	33	3.22581	1.78478e-06	8795, 6850, 7124, 8797, 1437, 673, 3937, 3458, 355, 356, 5335, 5578, 7535, 5579, 5777, 637, 836, 3932, 5294, 5594, 5595, 8743, 5058, 5894, 5290, 5291, 5293, 3804, 3805, 2534, 5604, 5605, 3802	759	122	6879	2.45153	0.000490695	5.57744e-06	2.59605e-06
KEGG_PATHWAY	hsa04010:MAPK signaling pathway	68	6.64712	2.10596e-12	6197, 6196, 7046, 4296, 7048, 7124, 2353, 7040, 7042, 6195, 5062, 673, 355, 3315, 356, 3553, 6788, 5578, 5579, 6789, 836, 5594, 5155, 5595, 5156, 5871, 6885, 9479, 3727, 27330, 1147, 1386, 207, 208, 4215, 51776, 4217, 3725, 4790, 9448, 8074, 1950, 1432, 1399, 2002, 5159, 5599, 51701, 1956, 5970, 7157, 5894, 5058, 3551, 2263, 2261, 2260, 4914, 5607, 4915, 1843, 3303, 5601, 5602, 627, 5604, 5605, 1…	759	253	6879	2.43597	5.79145e-10	1.34684e-11	6.26891e-12
KEGG_PATHWAY	hsa05166:HTLV-I infection	68	6.64712	2.56864e-12	7046, 7048, 7124, 2353, 1385, 7040, 7042, 472, 1019, 3716, 595, 3559, 111, 3558, 112, 3718, 113, 598, 1499, 114, 115, 7494, 5155, 7015, 5111, 5156, 1030, 3569, 1026, 1147, 324, 1386, 6513, 207, 208, 4215, 3725, 196883, 4790, 4792, 291, 293, 1437, 894, 896, 2002, 1111, 5159, 11200, 3932, 5294, 4087, 4088, 5970, 7157, 3551, 5290, 5291, 581, 5293, 2932, 466, 545, 107, 6777, 108, 109, 5925	759	254	6879	2.42638	7.06368e-10	1.56973e-11	7.30636e-12
KEGG_PATHWAY	hsa04922:Glucagon signaling pathway	26	2.54154	4.79851e-05	5261, 5140, 5562, 5563, 5465, 1385, 5260, 10891, 5315, 5834, 2308, 5836, 5837, 32, 150094, 23235, 23411, 23236, 2778, 1386, 6513, 207, 108, 208, 6514, 5207	759	99	6879	2.38025	0.0131095	0.00012449	5.79443e-05
KEGG_PATHWAY	hsa04727:GABAergic synapse	22	2.15054	0.000264424	18, 2561, 2560, 2570, 2569, 111, 2558, 112, 113, 114, 2555, 115, 2554, 2564, 2563, 107, 5578, 108, 5579, 109, 6714, 196883	759	85	6879	2.34578	0.0701445	0.000621509	0.000289284
KEGG_PATHWAY	hsa04550:Signaling pathways regulating pluripotency of stem cells	36	3.51906	1.98519e-06	130399, 6774, 4090, 3480, 4093, 3716, 3717, 3718, 3479, 1499, 1432, 90, 91, 658, 92, 5978, 5294, 4086, 5594, 4087, 5595, 4088, 5894, 2263, 2261, 5290, 2260, 5291, 5293, 2932, 324, 207, 79923, 208, 5604, 5605	759	140	6879	2.33055	0.000545778	6.06585e-06	2.82338e-06
KEGG_PATHWAY	hsa04022:cGMP-PKG signaling pathway	40	3.91007	7.3285e-07	5140, 8654, 1385, 291, 293, 154, 572, 111, 134, 112, 113, 114, 2983, 115, 2982, 3630, 5138, 4846, 9475, 5594, 5595, 4881, 5894, 4882, 23236, 140, 486, 1386, 107, 85366, 207, 108, 208, 109, 3667, 7408, 5604, 5605, 196883, 4638	759	158	6879	2.29449	0.000201513	2.39921e-06	1.11672e-06
KEGG_PATHWAY	hsa05132:Salmonella infection	21	2.05279	0.000522341	7099, 4790, 9475, 5594, 5595, 5970, 2353, 1437, 3569, 3458, 1432, 3576, 3553, 2919, 5599, 5601, 60, 5602, 4843, 4615, 3725	759	83	6879	2.29311	0.133836	0.00119703	0.000557163
KEGG_PATHWAY	hsa04713:Circadian entrainment	24	2.34604	0.00018967	5594, 8864, 5595, 1385, 2353, 23236, 6261, 111, 2778, 112, 113, 114, 2983, 115, 2982, 107, 5578, 108, 5579, 109, 2906, 2903, 2902, 196883	759	95	6879	2.28966	0.0508269	0.000461585	0.000214847
KEGG_PATHWAY	hsa04916:Melanogenesis	25	2.44379	0.000160037	5443, 1385, 3815, 111, 112, 113, 1499, 114, 115, 5578, 5579, 7299, 5594, 5595, 5894, 23236, 2778, 2932, 107, 108, 1906, 109, 5604, 5605, 196883	759	100	6879	2.26581	0.0430591	0.000392947	0.000182899
KEGG_PATHWAY	hsa04725:Cholinergic synapse	27	2.6393	0.000132816	1385, 2353, 111, 3717, 596, 112, 113, 114, 115, 5578, 5579, 5294, 5594, 5595, 23236, 5290, 5291, 5293, 2534, 107, 207, 108, 208, 109, 5604, 196883, 43	759	111	6879	2.20457	0.0358677	0.000329048	0.000153157
KEGG_PATHWAY	hsa05330:Allograft rejection	9	0.879765	0.0448306	3558, 3458, 355, 356, 3567, 7124, 940, 3565, 3586	759	37	6879	2.20457	0.999997	0.0795382	0.0448306
KEGG_PATHWAY	hsa05031:Amphetamine addiction	16	1.56403	0.00460118	1385, 2353, 23411, 111, 2778, 116443, 1386, 2354, 5578, 5579, 2906, 4128, 4129, 2903, 2902, 3725	759	66	6879	2.19715	0.718675	0.00951372	0.00460118
KEGG_PATHWAY	hsa05332:Graft-versus-host disease	8	0.782014	0.06415	3569, 3558, 3458, 355, 356, 7124, 940, 3553	759	33	6879	2.19715	1	0.110258	0.06415
KEGG_PATHWAY	hsa00330:Arginine and proline metabolism	12	1.17302	0.0180983	54498, 6611, 6303, 1152, 112483, 4128, 6723, 4953, 4843, 4129, 262, 4846	759	50	6879	2.17518	0.993413	0.0343243	0.0180983
KEGG_PATHWAY	hsa00010:Glycolysis / Gluconeogenesis	16	1.56403	0.00534176	5211, 5213, 130, 131, 220, 2821, 124, 2203, 125, 127, 128, 5313, 5214, 218, 5315, 8789	759	67	6879	2.16436	0.770745	0.0106448	0.00534176
KEGG_PATHWAY	hsa00480:Glutathione metabolism	12	1.17302	0.020857	2944, 2877, 2876, 2950, 2730, 6611, 5226, 6723, 4953, 2937, 2936, 2539	759	51	6879	2.13253	0.996961	0.0387545	0.020857
KEGG_PATHWAY	hsa05168:Herpes simplex infection	43	4.20332	2.19745e-06	8772, 4790, 4792, 7124, 6772, 4793, 2353, 9021, 1459, 3716, 3717, 1457, 1017, 3458, 355, 356, 3553, 5599, 6502, 5610, 6347, 836, 7297, 5371, 8864, 5970, 7157, 6885, 3551, 9451, 6041, 7097, 1965, 3569, 29110, 983, 1147, 841, 5601, 5602, 727, 4615, 3725	759	183	6879	2.12961	0.000604118	6.49785e-06	3.02445e-06
KEGG_PATHWAY	hsa04971:Gastric acid secretion	17	1.66178	0.00508812	1080, 23236, 111, 760, 2778, 112, 113, 114, 115, 107, 85366, 5578, 108, 5579, 109, 196883, 4638	759	73	6879	2.11062	0.754094	0.0103647	0.00508812
KEGG_PATHWAY	hsa04975:Fat digestion and absorption	9	0.879765	0.058846	8694, 5320, 335, 1056, 337, 338, 30814, 5406, 1208	759	39	6879	2.09152	1	0.102422	0.058846
KEGG_PATHWAY	hsa05416:Viral myocarditis	13	1.27077	0.0194762	25, 27, 595, 2534, 841, 940, 842, 1981, 857, 60, 637, 836, 4625	759	57	6879	2.06705	0.995523	0.0366846	0.0194762
KEGG_PATHWAY	hsa04630:Jak-STAT signaling pathway	33	3.22581	8.02243e-05	8651, 6772, 6774, 9021, 11009, 1437, 3716, 595, 3559, 3717, 3558, 3458, 3718, 894, 598, 896, 5777, 3952, 5617, 7297, 5294, 3596, 5290, 5291, 5292, 5293, 3569, 3567, 3565, 3586, 6777, 207, 208	759	145	6879	2.06267	0.021821	0.000206184	9.59693e-05
KEGG_PATHWAY	hsa05323:Rheumatoid arthritis	20	1.95503	0.0028476	7099, 6374, 7422, 6387, 7124, 2353, 7040, 7042, 7097, 284, 1437, 3569, 3458, 940, 3576, 3553, 2321, 4312, 6347, 3725	759	88	6879	2.05983	0.543519	0.00602378	0.0028476
KEGG_PATHWAY	hsa02010:ABC transporters	10	0.977517	0.0473555	1080, 24, 4363, 5243, 9429, 8714, 10057, 8647, 10257, 9619	759	44	6879	2.05983	0.999998	0.0834793	0.0473555
KEGG_PATHWAY	hsa04911:Insulin secretion	19	1.85728	0.00451918	1385, 23236, 111, 2778, 486, 112, 113, 114, 115, 1386, 107, 3630, 6513, 5578, 108, 5579, 109, 6514, 196883	759	85	6879	2.0259	0.712229	0.00941495	0.00451918
KEGG_PATHWAY	hsa04970:Salivary secretion	19	1.85728	0.00514466	4069, 4025, 23236, 154, 111, 2778, 486, 112, 113, 114, 2983, 115, 2982, 107, 5578, 108, 5579, 109, 196883	759	86	6879	2.00234	0.757907	0.0104028	0.00514466
KEGG_PATHWAY	hsa04972:Pancreatic secretion	20	1.95503	0.00541937	1080, 5320, 23236, 111, 760, 2778, 486, 112, 113, 114, 115, 1056, 107, 5578, 108, 5579, 109, 30814, 5406, 196883	759	93	6879	1.94908	0.775612	0.0107218	0.00541937
KEGG_PATHWAY	hsa04360:Axon guidance	27	2.6393	0.00121603	25, 4233, 1020, 2050, 5062, 2049, 2048, 2047, 2046, 285220, 9475, 5594, 5595, 6387, 5058, 2045, 2242, 2044, 2043, 2042, 2041, 2932, 2534, 3984, 3985, 1969, 5747	759	127	6879	1.92683	0.284383	0.00269683	0.00125525
KEGG_PATHWAY	hsa04020:Calcium signaling pathway	38	3.71457	0.000100023	5261, 291, 3362, 293, 5260, 154, 135, 113, 136, 114, 115, 5335, 5159, 5578, 5579, 2906, 4843, 2903, 2902, 1956, 4846, 5156, 2066, 2065, 2064, 23236, 6261, 2778, 3269, 2774, 107, 85366, 108, 109, 8877, 2915, 196883, 4638	759	179	6879	1.92404	0.0271327	0.000252351	0.000117458
KEGG_PATHWAY	hsa05034:Alcoholism	36	3.51906	0.000375923	1385, 3066, 8290, 3065, 111, 673, 135, 83933, 136, 51564, 3014, 9759, 55869, 2906, 10013, 4128, 4129, 2903, 10014, 2902, 5594, 5595, 9734, 5894, 8841, 10645, 2778, 4915, 79885, 116443, 1386, 2354, 84254, 627, 121504, 5604	759	177	6879	1.84337	0.0982323	0.000876092	0.000407781
KEGG_PATHWAY	hsa04924:Renin secretion	13	1.27077	0.0445094	5140, 4881, 5972, 1385, 23236, 183, 154, 111, 2778, 134, 112, 2983, 2982	759	64	6879	1.84097	0.999996	0.0794811	0.0445094
KEGG_PATHWAY	hsa04261:Adrenergic signaling in cardiomyocytes	28	2.73705	0.00199521	6331, 6332, 1385, 154, 111, 596, 112, 113, 114, 1432, 115, 70, 5578, 5515, 4625, 5594, 5595, 23236, 2778, 486, 1386, 107, 207, 108, 208, 109, 5528, 196883	759	138	6879	1.83892	0.422607	0.00432034	0.00201092
KEGG_PATHWAY	hsa04310:Wnt signaling pathway	28	2.73705	0.00199521	1459, 595, 1457, 894, 1499, 896, 1454, 1452, 6425, 5599, 5578, 5579, 51701, 22943, 9475, 64321, 7157, 6423, 6885, 11197, 6422, 23236, 2932, 2239, 324, 5601, 5602, 3725	759	138	6879	1.83892	0.422607	0.00432034	0.00201092
KEGG_PATHWAY	hsa05414:Dilated cardiomyopathy	17	1.66178	0.0196106	4000, 7124, 7040, 7042, 111, 2778, 112, 113, 114, 3479, 115, 107, 70, 108, 109, 60, 196883	759	84	6879	1.83423	0.995689	0.0366865	0.0196106
KEGG_PATHWAY	hsa05206:MicroRNAs in cancer	57	5.57185	9.6796e-06	8651, 11186, 5268, 1021, 3162, 7042, 4170, 472, 10018, 595, 596, 995, 5335, 5578, 5579, 836, 7057, 5155, 5156, 23411, 1789, 27250, 1027, 1786, 1026, 324, 2475, 4851, 5743, 4790, 25, 5243, 7422, 4233, 6774, 894, 1399, 57521, 578, 898, 5159, 8626, 1956, 4363, 7157, 5894, 3551, 2065, 2064, 2261, 5292, 5728, 5328, 3667, 5604, 4318, 5605	759	286	6879	1.80631	0.00265836	2.62327e-05	1.22101e-05
KEGG_PATHWAY	hsa04728:Dopaminergic synapse	25	2.44379	0.0060656	1385, 2353, 111, 1312, 1432, 5599, 5578, 5579, 4128, 5515, 1815, 4129, 2903, 6323, 23236, 2778, 2932, 2931, 2774, 1386, 207, 208, 5601, 5602, 5528	759	128	6879	1.77016	0.812339	0.0119146	0.0060656
KEGG_PATHWAY	hsa03320:PPAR signaling pathway	13	1.27077	0.0601043	34, 10062, 6256, 6258, 5465, 6257, 5170, 345, 335, 336, 4312, 4973, 5468	759	67	6879	1.75854	1	0.103954	0.0601043
KEGG_PATHWAY	hsa04724:Glutamatergic synapse	22	2.15054	0.0120403	5594, 5595, 23236, 111, 2778, 112, 113, 114, 116443, 115, 107, 5578, 108, 5579, 109, 2906, 2915, 2903, 2913, 2902, 2912, 196883	759	114	6879	1.74905	0.964249	0.0233175	0.0120403
KEGG_PATHWAY	hsa05010:Alzheimer's disease	32	3.12805	0.00255268	8772, 7124, 4035, 4311, 5664, 1020, 351, 572, 355, 498, 3553, 6622, 317, 2906, 637, 836, 2903, 2902, 2081, 5594, 5595, 22926, 6389, 23236, 9451, 2932, 840, 841, 842, 348, 506, 509	759	168	6879	1.72633	0.504846	0.00548428	0.00255268
KEGG_PATHWAY	hsa04530:Tight junction	16	1.56403	0.0515731	22989, 5872, 9074, 5590, 57644, 1019, 4629, 4619, 9080, 4620, 4622, 60, 5515, 6714, 4626, 4627	759	87	6879	1.6668	1	0.090335	0.0515731
KEGG_PATHWAY	hsa04670:Leukocyte transendothelial migration	21	2.05279	0.0252767	5294, 9475, 6387, 5290, 5291, 9074, 5293, 7294, 5829, 1499, 9080, 1432, 5335, 5578, 4313, 5579, 60, 7408, 5747, 3702, 4318	759	115	6879	1.65503	0.999124	0.0460337	0.0252767
KEGG_PATHWAY	hsa00230:Purine metabolism	32	3.12805	0.00527393	5140, 5142, 5143, 5144, 8654, 3000, 132, 111, 2986, 112, 113, 2984, 4907, 114, 2983, 115, 2982, 5313, 5138, 5315, 5151, 5152, 7498, 4881, 4882, 4860, 5150, 5148, 107, 108, 109, 196883	759	176	6879	1.64786	0.766406	0.0105864	0.00527393
KEGG_PATHWAY	hsa05100:Bacterial invasion of epithelial cells	14	1.36852	0.0830925	5294, 4233, 5290, 5291, 5293, 5829, 1499, 2335, 1399, 999, 857, 60, 5747, 6714	759	78	6879	1.62674	1	0.141928	0.0830925
KEGG_PATHWAY	hsa04390:Hippo signaling pathway	26	2.54154	0.023885	7046, 7048, 11186, 7040, 7161, 7042, 595, 332, 894, 1499, 896, 1454, 655, 1453, 6788, 658, 999, 5515, 4086, 5054, 4087, 4088, 5590, 2932, 324, 60	759	151	6879	1.56056	0.998704	0.0440831	0.023885
KEGG_PATHWAY	hsa04810:Regulation of actin cytoskeleton	35	3.42131	0.0132006	5062, 8074, 673, 1950, 2147, 1399, 5159, 3630, 1956, 5294, 9475, 5594, 5595, 5155, 5156, 5058, 5894, 2263, 2261, 5290, 2260, 5291, 5293, 5829, 2335, 324, 85366, 3984, 60, 3985, 5604, 5747, 6714, 5605, 4638	759	210	6879	1.51054	0.974122	0.0253859	0.0132006
KEGG_PATHWAY	hsa04060:Cytokine-cytokine receptor interaction	38	3.71457	0.0248883	8795, 7046, 58191, 6374, 7048, 9547, 7124, 6356, 8797, 7040, 7042, 11009, 1437, 1436, 3559, 3558, 3458, 355, 356, 655, 3576, 90, 3553, 91, 6347, 658, 92, 3952, 5617, 8743, 6387, 3596, 3569, 3567, 3565, 3586, 2919, 3627	759	243	6879	1.4173	0.999023	0.0456286	0.0248883
KEGG_PATHWAY	hsa01100:Metabolic pathways	154	15.0538	0.0351067	4056, 1066, 1583, 191, 317749, 231, 2821, 1577, 1576, 26275, 29785, 1056, 1573, 4048, 239, 4843, 95, 120227, 10135, 4967, 4846, 7299, 641371, 7298, 4860, 18, 1592, 157506, 240, 7173, 124, 125, 246, 1586, 247, 127, 128, 249, 30814, 5286, 5287, 5320, 5289, 250, 130, 131, 54490, 132, 4507, 498, 4907, 2203, 79799, 54659, 5313, 54658, 8789, 54657, 5315, 5834, 5836, 32, 5837, 34, 36, 5211, 5213, 6389, …	759	1219	6879	1.14499	0.999946	0.0631003	0.0351067
