# Supplementary material for: Small molecules for cell reprogramming: a systems biology analysis
Source: Aging (Albany NY). 2021 Dec 17;13(24):25739–62. doi: 10.18632/aging.203791 (PMC8751603; doi:10.18632/aging.203791)
Supplement: Supplementary Table 8 [file aging-13-203791-s009.xlsx]

## Sheet: all_kegg_pathways
Supplementary Table 8. KEGG pathways enrichment for each SM cocktail.
Term	#1	#2	#3	#4	#5	#6	#7	#8	#9	#10
hsa05200:Pathways in cancer	*	*	*	*	*	*	*	*	*	*
hsa04919:Thyroid hormone signaling pathway	*	*	*	*		*	*	*	*	*
hsa05210:Colorectal cancer	*	*	*	*		*	*	*	*	*
hsa05166:HTLV-I infection	*	*		*	*	*	*	*	*
hsa05213:Endometrial cancer	*		*	*		*	*	*	*	*
hsa05034:Alcoholism	*		*	*		*	*	*	*	*
hsa04916:Melanogenesis	*				*	*	*	*	*	*
hsa04062:Chemokine signaling pathway	*				*	*	*	*	*	*
hsa04915:Estrogen signaling pathway	*			*	*	*	*	*	*
hsa04923:Regulation of lipolysis in adipocytes	*				*	*	*	*	*
hsa04917:Prolactin signaling pathway			*	*		*	*		*	*
hsa04918:Thyroid hormone synthesis	*				*	*	*	*	*
hsa04750:Inflammatory mediator regulation of TRP channels	*				*	*	*	*	*
hsa05032:Morphine addiction	*				*	*	*	*	*
hsa04911:Insulin secretion	*				*	*	*	*	*
hsa05161:Hepatitis B	*		*	*		*	*		*
hsa04727:GABAergic synapse	*				*	*	*	*	*
hsa05414:Dilated cardiomyopathy	*				*	*	*	*	*
hsa04114:Oocyte meiosis	*				*	*	*	*	*
hsa04723:Retrograde endocannabinoid signaling	*				*	*	*	*	*
hsa04971:Gastric acid secretion	*				*	*	*	*	*
hsa04015:Rap1 signaling pathway	*				*	*	*	*	*
hsa04972:Pancreatic secretion	*				*	*	*	*	*
hsa04970:Salivary secretion	*				*	*	*	*	*
hsa04611:Platelet activation	*				*	*	*	*	*
hsa04270:Vascular smooth muscle contraction	*				*	*	*	*	*
hsa04921:Oxytocin signaling pathway	*				*	*	*	*	*
hsa04022:cGMP-PKG signaling pathway	*				*	*	*	*	*
hsa04540:Gap junction	*				*	*	*	*	*
hsa04976:Bile secretion	*				*	*	*	*	*
hsa04261:Adrenergic signaling in cardiomyocytes	*				*	*	*	*	*
hsa04713:Circadian entrainment	*				*	*	*	*	*
hsa05220:Chronic myeloid leukemia	*	*	*	*			*			*
hsa04724:Glutamatergic synapse	*				*	*	*	*	*
hsa04913:Ovarian steroidogenesis	*				*	*	*	*	*
hsa04912:GnRH signaling pathway	*				*	*	*	*	*
hsa00230:Purine metabolism	*				*	*	*	*	*
hsa04925:Aldosterone synthesis and secretion	*				*	*	*	*	*
hsa04914:Progesterone-mediated oocyte maturation	*				*	*	*	*	*
hsa04024:cAMP signaling pathway	*				*	*	*	*	*
hsa04725:Cholinergic synapse	*				*	*	*	*	*
hsa05142:Chagas disease (American trypanosomiasis)	*					*	*	*	*
hsa05223:Non-small cell lung cancer	*			*		*	*		*
hsa04020:Calcium signaling pathway	*				*	*		*	*
hsa04924:Renin secretion	*				*	*		*	*
hsa04726:Serotonergic synapse	*					*		*	*
hsa05203:Viral carcinogenesis	*		*	*			*
hsa04728:Dopaminergic synapse	*					*		*	*
hsa05215:Prostate cancer		*		*			*			*
hsa00982:Drug metabolism - cytochrome P450	*					*		*	*
hsa05216:Thyroid cancer				*			*			*
hsa05212:Pancreatic cancer		*		*			*
hsa05145:Toxoplasmosis				*			*
hsa04662:B cell receptor signaling pathway										*
hsa04012:ErbB signaling pathway										*
hsa04550:Signaling pathways regulating pluripotency of stem cells										*
hsa04660:T cell receptor signaling pathway										*
hsa04722:Neurotrophin signaling pathway										*
hsa04910:Insulin signaling pathway										*
hsa04115:p53 signaling pathway							*
hsa04320:Dorso-ventral axis formation										*
hsa05219:Bladder cancer							*
hsa05014:Amyotrophic lateral sclerosis (ALS)				*
hsa05214:Glioma				*
hsa05016:Huntington's disease				*
hsa05221:Acute myeloid leukemia				*
hsa05169:Epstein-Barr virus infection				*
hsa05205:Proteoglycans in cancer				*
hsa05160:Hepatitis C				*
hsa04210:Apoptosis				*
hsa05222:Small cell lung cancer				*
hsa04962:Vasopressin-regulated water reabsorption					*
hsa05164:Influenza A										*
