# Supplementary material for: Small molecules for cell reprogramming: a systems biology analysis
Source: Aging (Albany NY). 2021 Dec 17;13(24):25739–62. doi: 10.18632/aging.203791 (PMC8751603; doi:10.18632/aging.203791)
Supplement: Supplementary Table 9 [file aging-13-203791-s010.xlsx]

## Sheet: Nodes
Supplementary Table 9. Gene targets of all curated SMs - PPI network nodes.
Entrez ID	Symbol	Protein	AverageShortestPathLength	BetweennessCentrality	ClosenessCentrality	ClusteringCoefficient	Degree	Eccentricity	IsSingleNode	NeighborhoodConnectivity	NumberOfDirectedEdges	NumberOfUndirectedEdges	PartnerOfMultiEdgedNodePairs	Radiality	SelfLoops	Stress	TopologicalCoefficient
65268	WNK2	ENSP00000297954	3.9183	0	0.255213	0	1	7	FALSE	13	0	1	0	0.983033	0	0	0
4100	MAGEA1	ENSP00000349085	3.12083	2.62205e-05	0.320428	0.333333	3	6	FALSE	42	0	3	0	0.98767	0	330	0.382263
2561	GABRB2	ENSP00000274547	0	0	0	0	0	0	TRUE	0	0	0	0	Infinity	0	0	0
6648	SOD2	ENSP00000356022	2.8481	0.00350613	0.351111	0.0952381	7	6	FALSE	39.5714	0	7	0	0.989255	0	19260	0.168103
8929	PHOX2B	ENSP00000226382	0	0	0	0	0	0	TRUE	0	0	0	0	Infinity	0	0	0
6795	AURKC	ENSP00000302898	3.26582	0.000190219	0.306202	0.142857	7	6	FALSE	11	0	7	0	0.986827	0	1456	0.179803
108	ADCY2	ENSP00000342952	3.65247	1.49709e-05	0.273787	0	2	6	FALSE	7	0	2	0	0.984579	0	52	0.5
5444	PON1	ENSP00000222381	3.36939	2.59907e-05	0.29679	0	2	7	FALSE	17.5	0	2	0	0.986224	0	162	0.515625
6725	SRMS	ENSP00000217188	3.28308	0	0.304592	0	1	6	FALSE	61	0	1	0	0.986726	0	0	0
80122	MAP3K19	ENSP00000365005	0	0	0	0	0	0	TRUE	0	0	0	0	Infinity	0	0	0
57085	AGTRAP	ENSP00000319713	3.2382	0.00249611	0.308813	0	4	6	FALSE	18	0	4	0	0.986987	0	13582	0.25
10461	MERTK	ENSP00000295408	3.27388	1.46372e-06	0.305448	0	2	6	FALSE	53.5	0	2	0	0.98678	0	24	0.564516
54490	UGT2B28	ENSP00000334276	0	0	0	0	0	0	TRUE	0	0	0	0	Infinity	0	0	0
10720	UGT2B11	ENSP00000387683	0	0	0	0	0	0	TRUE	0	0	0	0	Infinity	0	0	0
293	SLC25A6	ENSP00000370808	2.65938	0.00161958	0.376028	0.0333333	16	5	FALSE	37.5625	0	16	0	0.990352	0	14966	0.110261
399687	MYO18A	ENSP00000437073	2.65247	0.000929976	0.377007	0.32381	21	6	FALSE	37.5714	0	21	0	0.990393	0	11514	0.105242
7837	PXDN	ENSP00000252804	2.77215	0.000377773	0.360731	0.2	6	5	FALSE	69.1667	0	6	0	0.989697	0	3454	0.240676
5950	RBP4	ENSP00000360519	4.10357	0	0.24369	0	1	7	FALSE	9	0	1	0	0.981956	0	0	0
902	CCNH	ENSP00000256897	2.78366	0.000140079	0.359239	0.392857	8	6	FALSE	68.5	0	8	0	0.98963	0	2002	0.22418
271		ENSP00000256578	2.97929	0.000127859	0.335651	0	3	5	FALSE	60	0	3	0	0.988493	0	998	0.343023
7264	TSTA3	ENSP00000398803	3.51438	0	0.284545	1	2	6	FALSE	10.5	0	2	0	0.985381	0	0	0.552632
1485	CTAG1B	ENSP00000332602	0	0	0	0	0	0	TRUE	0	0	0	0	Infinity	0	0	0
79923	NANOG	ENSP00000229307	2.96548	0.000253993	0.337214	0	8	6	FALSE	25.75	0	8	0	0.988573	0	2236	0.162829
1592	CYP26A1	ENSP00000224356	0	0	0	0	0	0	TRUE	0	0	0	0	Infinity	0	0	0
3990	LIPC	ENSP00000299022	3.56387	6.55392e-06	0.280594	0	2	7	FALSE	11	0	2	0	0.985094	0	32	0.526316
1965	EIF2S1	ENSP00000256383	2.58803	0.000802275	0.386394	0.27619	15	5	FALSE	56	0	15	0	0.990767	0	7878	0.142154
8639	AOC3	ENSP00000312326	3.27618	0	0.305234	0	1	6	FALSE	61	0	1	0	0.986766	0	0	0
3284	HSD3B2	ENSP00000358424	3.56732	0.0023015	0.280323	0	2	7	FALSE	10.5	0	2	0	0.985074	0	18458	0.5
5300	PIN1	ENSP00000247970	2.42463	0.00805677	0.412435	0.121454	48	6	FALSE	37.5208	0	48	0	0.991717	0	70430	0.0748333
2984	GUCY2C	ENSP00000261170	0	0	0	0	0	0	TRUE	0	0	0	0	Infinity	0	0	0
92	ACVR2A	ENSP00000241416	3.36479	9.20398e-05	0.297196	0.333333	6	6	FALSE	9.83333	0	6	0	0.986251	0	794	0.210145
3702	ITK	ENSP00000398655	2.7756	0.00012105	0.360282	0.418182	11	6	FALSE	52.0909	0	11	0	0.989677	0	1754	0.187726
4542	MYO1F	ENSP00000344871	3.52704	0	0.283524	0	1	7	FALSE	36	0	1	0	0.985308	0	0	0
7015	TERT	ENSP00000309572	2.71922	0.00193638	0.367753	0.273846	26	6	FALSE	34.5769	0	26	0	0.990005	0	21374	0.11129
56603	CYP26B1	ENSP00000001146	0	0	0	0	0	0	TRUE	0	0	0	0	Infinity	0	0	0
4129	MAOB	ENSP00000367309	1	0	1	0	1	1	FALSE	1	0	1	0	1	0	0	0
1725	DHPS	ENSP00000210060	3.05409	0.000633118	0.32743	0	8	6	FALSE	17	0	8	0	0.988058	0	4542	0.142857
5978	REST	ENSP00000311816	2.63867	0.000723899	0.37898	0.196667	25	6	FALSE	41.52	0	25	0	0.990473	0	8902	0.113736
1431	CS	ENSP00000342056	2.8389	6.29545e-05	0.35225	0.333333	6	5	FALSE	55.8333	0	6	0	0.989309	0	982	0.231944
29110	TBK1	ENSP00000329967	2.43153	0.00296648	0.411264	0.239766	19	5	FALSE	67	0	19	0	0.991677	0	24186	0.128397
66002	CYP4F12	ENSP00000321821	3.84695	0	0.259946	0	1	7	FALSE	7	0	1	0	0.983448	0	0	0
7124	TNF	ENSP00000398698	2.54891	0.00307352	0.392325	0.0909091	34	6	FALSE	31.7647	0	34	0	0.990995	0	26794	0.0774221
9479	MAPK8IP1	ENSP00000241014	2.58228	0.00101511	0.387255	0.274725	14	6	FALSE	53.4286	0	14	0	0.990801	0	9152	0.128744
2118	ETV4	ENSP00000321835	2.77215	7.27377e-05	0.360731	0.466667	6	6	FALSE	67.6667	0	6	0	0.989697	0	1300	0.225556
95	ACY1	ENSP00000384296	2.88608	2.25926e-05	0.346491	0.333333	3	6	FALSE	81.3333	0	3	0	0.989034	0	212	0.369863
1457	CSNK2A1	ENSP00000217244	2.19563	0.0135421	0.455451	0.167947	63	5	FALSE	47.1587	0	63	0	0.993049	0	129032	0.0718399
1676	DFFA	ENSP00000366237	2.83544	0.000364147	0.352679	0.138889	9	5	FALSE	37.3333	0	9	0	0.989329	0	2868	0.149798
27330	RPS6KA6	ENSP00000262752	2.88723	5.24749e-05	0.346353	0.166667	4	6	FALSE	68.5	0	4	0	0.989028	0	742	0.289362
6665	SOX15	ENSP00000355354	0	0	0	0	0	0	TRUE	0	0	0	0	Infinity	0	0	0
6733	SRPK2	ENSP00000377262	2.34983	0.0210697	0.425563	0.0975976	37	5	FALSE	36.7297	0	37	0	0.992152	0	122958	0.0667029
272		ENSP00000379802	3.67204	0	0.272328	0	1	7	FALSE	21	0	1	0	0.984465	0	0	0
3303	HSPA1A	ENSP00000364802	2.32451	0.00562612	0.430198	0.138039	51	5	FALSE	45.5686	0	51	0	0.992299	0	70964	0.0800165
4128	MAOA	ENSP00000340684	1	0	1	0	1	1	FALSE	1	0	1	0	1	0	0	0
567	B2M	ENSP00000452780	3.19217	6.17881e-06	0.313266	0	2	7	FALSE	58.5	0	2	0	0.987255	0	110	0.527523
145226	RDH12	ENSP00000267502	3.81128	0	0.262379	0	1	7	FALSE	13	0	1	0	0.983655	0	0	0
2870	GRK6	ENSP00000433511	3.34638	5.95223e-06	0.298831	0	2	7	FALSE	27	0	2	0	0.986358	0	58	0.52
324	APC	ENSP00000257430	2.74684	0.000494711	0.364055	0.12381	15	6	FALSE	36	0	15	0	0.989844	0	4636	0.119732
3985	LIMK2	ENSP00000339916	2.91254	0.000137349	0.343343	0.047619	7	6	FALSE	38.8571	0	7	0	0.988881	0	1408	0.197631
5152	PDE9A	ENSP00000291539	3.72727	1.53614e-05	0.268293	0	2	7	FALSE	7	0	2	0	0.984144	0	46	0.5
9263	STK17A	ENSP00000319192	0	0	0	0	0	0	TRUE	0	0	0	0	Infinity	0	0	0
7365	UGT2B10	ENSP00000265403	3.3855	0	0.295377	0	1	7	FALSE	50	0	1	0	0.986131	0	0	0
9262	STK17B	ENSP00000263955	3.03222	0.00020883	0.329791	0	3	7	FALSE	58.3333	0	3	0	0.988185	0	752	0.337255
22943	DKK1	ENSP00000363081	3.06099	7.76577e-05	0.326692	0	3	6	FALSE	38.6667	0	3	0	0.988018	0	908	0.348765
5834	PYGB	ENSP00000216962	2.81128	0.00076842	0.35571	0.25	9	5	FALSE	43	0	9	0	0.989469	0	7286	0.169521
58	ACTA1	ENSP00000355645	2.42463	0.00320291	0.412435	0.159091	33	5	FALSE	47.9394	0	33	0	0.991717	0	35188	0.0932083
8743	TNFSF10	ENSP00000241261	3.05409	0.000126068	0.32743	0.464286	8	6	FALSE	27	0	8	0	0.988058	0	1710	0.191964
3055	HCK	ENSP00000365012	2.54545	0.00149578	0.392857	0.205263	20	6	FALSE	45	0	20	0	0.991015	0	13730	0.104535
2877	GPX2	ENSP00000374265	3.05984	0	0.326815	0	1	7	FALSE	172	0	1	0	0.988024	0	0	0
545	ATR	ENSP00000343741	2.55696	0.00137151	0.391089	0.2	21	6	FALSE	45.4762	0	21	0	0.990948	0	12990	0.109616
3014	H2AFX	ENSP00000364310	2.35328	0.0062965	0.424939	0.174216	42	6	FALSE	45.4048	0	42	0	0.992132	0	56500	0.0821256
6041	RNASEL	ENSP00000356530	3.04143	0	0.328793	1	2	7	FALSE	99	0	2	0	0.988131	0	0	0.540984
5777	PTPN6	ENSP00000391592	2.54661	0.00323645	0.39268	0.25977	30	5	FALSE	39.9667	0	30	0	0.991008	0	27952	0.0934426
5047	PAEP	ENSP00000277508	3.06559	0	0.326201	0	1	7	FALSE	162	0	1	0	0.987991	0	0	0
9448	MAP4K4	ENSP00000314363	2.95742	0.000113291	0.338132	0.1	5	5	FALSE	45	0	5	0	0.98862	0	798	0.23125
54790	TET2	ENSP00000369351	2.8481	0.000613838	0.351111	0.0571429	15	6	FALSE	27.3333	0	15	0	0.989255	0	6846	0.125271
5268	SERPINB5	ENSP00000372221	2.80667	0.000932299	0.356294	0.111111	10	6	FALSE	43.7	0	10	0	0.989496	0	7146	0.157664
130	ADH6	ENSP00000378359	0	0	0	0	0	0	TRUE	0	0	0	0	Infinity	0	0	0
1312	COMT	ENSP00000354511	3.06789	0.00117269	0.325956	0	6	6	FALSE	25.6667	0	6	0	0.987977	0	7450	0.203857
3727	JUND	ENSP00000252818	2.83084	0.000181796	0.353252	0.406593	14	6	FALSE	40.4286	0	14	0	0.989356	0	2110	0.162442
4683	NBN	ENSP00000265433	2.6214	0.000544159	0.381475	0.274854	19	6	FALSE	47.2105	0	19	0	0.990573	0	7346	0.123636
59	ACTA2	ENSP00000224784	2.63751	0.000918346	0.379145	0.252747	14	6	FALSE	46.8571	0	14	0	0.99048	0	8420	0.126597
5127	CDK16	ENSP00000276052	2.69275	0.000518062	0.371368	0.305556	9	6	FALSE	57.8889	0	9	0	0.990158	0	4818	0.171269
836	CASP3	ENSP00000311032	2.40621	0.00494104	0.415591	0.169512	41	5	FALSE	40.122	0	41	0	0.991824	0	50444	0.0782104
213	ALB	ENSP00000295897	2.67319	0.00902136	0.374085	0.047619	21	6	FALSE	23.4762	0	21	0	0.990272	0	59070	0.0691474
306	ANXA3	ENSP00000264908	2.88838	7.29093e-06	0.346215	0.333333	3	7	FALSE	94.6667	0	3	0	0.989021	0	206	0.398031
7535	ZAP70	ENSP00000264972	2.66168	0.000378019	0.375703	0.348485	12	6	FALSE	53.5	0	12	0	0.990339	0	5430	0.14986
983	CDK1	ENSP00000378699	2.36594	0.00459913	0.422665	0.158454	46	5	FALSE	44.3696	0	46	0	0.992059	0	52678	0.0819336
1577	CYP3A5	ENSP00000222982	3.80322	0.0023015	0.262935	0	2	7	FALSE	3	0	2	0	0.983702	0	11592	0.5
1111	CHEK1	ENSP00000388648	2.55811	0.00251979	0.390913	0.314286	15	6	FALSE	63.8	0	15	0	0.990941	0	19070	0.14891
11200	CHEK2	ENSP00000372023	2.46145	0.00286415	0.406265	0.142529	30	6	FALSE	44.9333	0	30	0	0.991503	0	28362	0.0921811
10057	ABCC5	ENSP00000333926	4.68124	0	0.213618	0	1	8	FALSE	2	0	1	0	0.978597	0	0	0
23028	KDM1A	ENSP00000383042	2.40276	0.00474755	0.416188	0.196697	37	5	FALSE	48.973	0	37	0	0.991844	0	48400	0.0934083
91	ACVR1B	ENSP00000442656	2.83199	0.000892013	0.353108	0.214286	8	5	FALSE	43.625	0	8	0	0.989349	0	6290	0.169922
113	ADCY7	ENSP00000254235	0	0	0	0	0	0	TRUE	0	0	0	0	Infinity	0	0	0
6667	SP1	ENSP00000329357	2.30725	0.00985023	0.433416	0.185117	74	6	FALSE	42.9595	0	74	0	0.9924	0	106730	0.0754524
6751	SSTR1	ENSP00000267377	0	0	0	0	0	0	TRUE	0	0	0	0	Infinity	0	0	0
2042	EPHA3	ENSP00000337451	2.77215	0.00219191	0.360731	0.466667	6	6	FALSE	75.5	0	6	0	0.989697	0	16262	0.255367
8795	TNFRSF10B	ENSP00000276431	2.79056	0.00098415	0.358351	0.406593	14	6	FALSE	34	0	14	0	0.98959	0	8648	0.124019
356	FASLG	ENSP00000356694	2.75144	0.00327541	0.363446	0.219048	21	6	FALSE	28.1905	0	21	0	0.989817	0	24930	0.0994447
6495	SIX1	ENSP00000247182	3.99655	2.89699e-06	0.250216	0	2	7	FALSE	3.5	0	2	0	0.982578	0	26	0.625
843	CASP10	ENSP00000286186	2.91945	0.000426255	0.342531	0.419118	17	6	FALSE	23.4118	0	17	0	0.98884	0	5178	0.117647
5617	PRL	ENSP00000302150	0	0	0	0	0	0	TRUE	0	0	0	0	Infinity	0	0	0
5515	PPP2CA	ENSP00000418447	2.32336	0.008126	0.430411	0.132801	53	5	FALSE	41.5283	0	53	0	0.992306	0	77818	0.0734346
841	CASP8	ENSP00000351273	2.54545	0.00504605	0.392857	0.158974	40	6	FALSE	30.95	0	40	0	0.991015	0	46312	0.0736277
1056	CEL	ENSP00000361151	5.3038	0	0.188544	0	1	8	FALSE	2	0	1	0	0.974978	0	0	0
124	ADH1A	ENSP00000209668	3.50403	0	0.285386	0	1	6	FALSE	26	0	1	0	0.985442	0	0	0
2950	GSTP1	ENSP00000381607	2.52704	0.00104011	0.395719	0.161905	15	5	FALSE	62.0667	0	15	0	0.991122	0	11496	0.138244
8290	HIST3H3	ENSP00000355657	2.68585	0.0071685	0.372322	0.0907258	32	6	FALSE	25.6562	0	32	0	0.990199	0	69164	0.0813301
857	CAV1	ENSP00000339191	2.28884	0.0112587	0.436903	0.140592	44	5	FALSE	45.1364	0	44	0	0.992507	0	91852	0.0749508
5591	PRKDC	ENSP00000313420	2.24396	0.0126852	0.445641	0.152074	63	5	FALSE	46.1429	0	63	0	0.992768	0	127528	0.0747784
1385	CREB1	ENSP00000387699	2.47296	0.00257176	0.404374	0.238916	29	6	FALSE	51.6207	0	29	0	0.991436	0	27740	0.106654
51168	MYO15A	ENSP00000205890	3.75029	0	0.266646	0	1	7	FALSE	21	0	1	0	0.98401	0	0	0
1573	CYP2J2	ENSP00000360247	0	0	0	0	0	0	TRUE	0	0	0	0	Infinity	0	0	0
1050	CEBPA	ENSP00000427514	2.60529	0.00280776	0.383834	0.289231	26	6	FALSE	47.6538	0	26	0	0.990667	0	25528	0.120963
595	CCND1	ENSP00000227507	2.47296	0.00201235	0.404374	0.255255	37	6	FALSE	49.8649	0	37	0	0.991436	0	24406	0.104425
1399	CRKL	ENSP00000346300	2.58803	0.00389367	0.386394	0.206522	24	5	FALSE	40.5833	0	24	0	0.990767	0	30652	0.10125
2308	FOXO1	ENSP00000368880	2.71346	0.000269969	0.368533	0.321637	19	6	FALSE	47.5263	0	19	0	0.990038	0	3928	0.147597
7364	UGT2B7	ENSP00000304811	4.44879	0	0.22478	0	1	7	FALSE	6	0	1	0	0.979949	0	0	0
8647	ABCB11	ENSP00000263817	0	0	0	0	0	0	TRUE	0	0	0	0	Infinity	0	0	0
83933	HDAC10	ENSP00000216271	3.09206	5.15554e-05	0.323409	0.166667	4	6	FALSE	41.25	0	4	0	0.987837	0	634	0.367117
55869	HDAC8	ENSP00000362674	3.09091	8.87514e-05	0.323529	0.0952381	7	6	FALSE	21.7143	0	7	0	0.987844	0	784	0.180708
4118	MAL	ENSP00000310880	3.24511	2.68057e-05	0.308156	0	2	6	FALSE	36	0	2	0	0.986947	0	140	0.507246
8424	BBOX1	ENSP00000263182	3.39586	7.76795e-06	0.294476	0	2	6	FALSE	13.5	0	2	0	0.986071	0	158	0.5
5595	MAPK3	ENSP00000263025	2.41887	0.00658983	0.413416	0.119334	47	6	FALSE	34.6809	0	47	0	0.991751	0	54038	0.0674796
1025	CDK9	ENSP00000362361	2.30035	0.0158039	0.434717	0.124467	69	5	FALSE	37.2464	0	69	0	0.99244	0	151160	0.0657945
5972	REN	ENSP00000272190	4.00806	0	0.249498	0	1	8	FALSE	4	0	1	0	0.982511	0	0	0
2534	FYN	ENSP00000346671	2.51554	0.0101236	0.39753	0.0896104	56	6	FALSE	25.8571	0	56	0	0.991189	0	96066	0.0608747
5447	POR	ENSP00000419970	2.96663	0.0151855	0.337083	0.142857	8	5	FALSE	28.25	0	8	0	0.988566	0	125942	0.142132
79858	NEK11	ENSP00000372857	3.06559	0	0.326201	0	1	7	FALSE	162	0	1	0	0.987991	0	0	0
7363	UGT2B4	ENSP00000305221	0	0	0	0	0	0	TRUE	0	0	0	0	Infinity	0	0	0
1557	CYP2C19	ENSP00000360372	3.95742	0	0.25269	1	2	6	FALSE	6.5	0	2	0	0.982806	0	0	0.722222
3932	LCK	ENSP00000337825	2.75604	0.00058465	0.362839	0.177866	23	6	FALSE	32.9565	0	23	0	0.98979	0	6890	0.108624
1559	CYP2C9	ENSP00000260682	3.88147	0.000144916	0.257634	0.3	5	6	FALSE	4.2	0	5	0	0.983247	0	646	0.285714
1544	CYP1A2	ENSP00000342007	3.62716	9.90269e-05	0.275698	0	2	6	FALSE	9	0	2	0	0.984726	0	206	0.5
10626	TRIM16	ENSP00000338989	2.9954	0.000147901	0.333846	0.333333	3	7	FALSE	64.3333	0	3	0	0.988399	0	402	0.345946
5156	PDGFRA	ENSP00000257290	2.44074	0.00194164	0.409712	0.344828	30	5	FALSE	51.2	0	30	0	0.991624	0	22486	0.101587
9672	SDC3	ENSP00000344468	3.42923	0	0.291611	1	2	7	FALSE	36	0	2	0	0.985877	0	0	0.5625
56616	DIABLO	ENSP00000398495	3.10472	0.000282737	0.32209	0.133333	6	6	FALSE	20.1667	0	6	0	0.987763	0	1948	0.19637
334	APLP2	ENSP00000263574	3.10932	9.43452e-06	0.321614	0.5	4	6	FALSE	44	0	4	0	0.987737	0	168	0.328947
54657	UGT1A4	ENSP00000362508	0	0	0	0	0	0	TRUE	0	0	0	0	Infinity	0	0	0
10398		ENSP00000279022	2.73648	0.000107573	0.365433	0.333333	10	6	FALSE	57.9	0	10	0	0.989904	0	1718	0.176524
10495	ENOX2	ENSP00000337146	3.34868	0	0.298625	0	1	6	FALSE	37	0	1	0	0.986345	0	0	0
3553	IL1B	ENSP00000263341	2.78826	8.35365e-05	0.358646	0	5	6	FALSE	72.2	0	5	0	0.989603	0	1800	0.252482
9141	PDCD5	ENSP00000466214	2.80667	2.725e-05	0.356294	0.5	4	6	FALSE	84.5	0	4	0	0.989496	0	740	0.315299
1859	DYRK1A	ENSP00000381932	2.56157	0.00028472	0.390386	0.222222	9	5	FALSE	76.6667	0	9	0	0.990921	0	5654	0.177469
3291	HSD11B2	ENSP00000316786	3.1565	4.2952e-06	0.316806	0	2	6	FALSE	56	0	2	0	0.987462	0	66	0.509259
51564	HDAC7	ENSP00000080059	2.59379	0.000392303	0.385537	0.372549	18	6	FALSE	57.9444	0	18	0	0.990734	0	5956	0.14414
4292	MLH1	ENSP00000231790	2.64097	0.000711041	0.378649	0.220779	22	5	FALSE	37.5	0	22	0	0.990459	0	7404	0.104167
5287	PIK3C2B	ENSP00000356155	2.73763	6.15343e-06	0.36528	0.666667	3	5	FALSE	151	0	3	0	0.989898	0	390	0.474843
23410	SIRT3	ENSP00000372191	2.8435	0.000168172	0.351679	0.166667	9	6	FALSE	40	0	9	0	0.989282	0	1486	0.164371
4651	MYO10	ENSP00000421280	0	0	0	0	0	0	TRUE	0	0	0	0	Infinity	0	0	0
5292	PIM1	ENSP00000362608	2.63636	0.000504248	0.37931	0.133333	10	6	FALSE	56.4	0	10	0	0.990486	0	4180	0.151075
6513	SLC2A1	ENSP00000416293	2.9252	0.000205313	0.341857	0	6	6	FALSE	42.8333	0	6	0	0.988807	0	1618	0.202093
2563	GABRD	ENSP00000367848	3.89988	0	0.256418	0	1	8	FALSE	7	0	1	0	0.98314	0	0	0
10919	EHMT2	ENSP00000364687	2.6214	0.00426582	0.381475	0.338235	17	6	FALSE	52.8824	0	17	0	0.990573	0	33694	0.136849
83758	RBP5	ENSP00000266560	3.68239	0.0023015	0.271562	0	2	7	FALSE	16.5	0	2	0	0.984405	0	23646	0.5
3269	HRH1	ENSP00000380247	1	0	1	0	1	1	FALSE	1	0	1	0	1	0	0	0
7465	WEE1	ENSP00000402084	2.93671	2.72167e-05	0.340517	0.190476	7	6	FALSE	40.7143	0	7	0	0.98874	0	398	0.218126
8644	AKR1C3	ENSP00000369927	3.29919	0	0.303104	0	1	6	FALSE	69	0	1	0	0.986633	0	0	0
1586	CYP17A1	ENSP00000358903	3.02301	3.03013e-05	0.330796	0.2	5	6	FALSE	40.6	0	5	0	0.988238	0	298	0.266225
84266	ALKBH7	ENSP00000245812	2.86997	7.25862e-06	0.348436	0	2	7	FALSE	135	0	2	0	0.989128	0	340	0.553719
5728	PTEN	ENSP00000361021	2.38205	0.0110055	0.419807	0.114796	49	6	FALSE	37.2653	0	49	0	0.991965	0	93334	0.071194
9734	HDAC9	ENSP00000408617	2.66743	0.000225397	0.374892	0.323529	17	6	FALSE	51.8235	0	17	0	0.990306	0	3348	0.148491
195814	SDR16C5	ENSP00000307607	3.78021	0	0.264536	0	1	7	FALSE	10	0	1	0	0.983836	0	0	0
57834	CYP4F11	ENSP00000248041	0	0	0	0	0	0	TRUE	0	0	0	0	Infinity	0	0	0
10880	ACTL7B	ENSP00000363799	3.06559	0	0.326201	0	1	7	FALSE	162	0	1	0	0.987991	0	0	0
2050	EPHB4	ENSP00000350896	3.00806	0.00208577	0.332441	0	3	7	FALSE	59.3333	0	3	0	0.988325	0	12164	0.339147
655	BMP7	ENSP00000379204	3.19908	0.000266753	0.31259	0.0666667	6	6	FALSE	16	0	6	0	0.987215	0	2018	0.186992
27	ABL2	ENSP00000427562	2.67319	0.000847481	0.374085	0.341667	16	5	FALSE	43.8125	0	16	0	0.990272	0	7396	0.127551
3815	KIT	ENSP00000288135	2.82969	0.000500447	0.353396	0.228571	21	5	FALSE	28.0476	0	21	0	0.989362	0	5644	0.124105
6709	SPTAN1	ENSP00000361824	2.43498	0.00772937	0.410681	0.159664	35	5	FALSE	43.5429	0	35	0	0.991657	0	69066	0.0861103
9021	SOCS3	ENSP00000330341	2.56962	0.00139925	0.389163	0.181159	24	6	FALSE	38.5	0	24	0	0.990874	0	14122	0.0943898
54884	RETSAT	ENSP00000295802	3.06559	0	0.326201	0	1	7	FALSE	162	0	1	0	0.987991	0	0	0
2931	GSK3A	ENSP00000222330	2.61105	0.00127928	0.382988	0.173913	24	5	FALSE	42.2083	0	24	0	0.990633	0	13674	0.113047
84254	CAMKK1	ENSP00000158166	2.95052	2.23248e-05	0.338924	0.333333	3	6	FALSE	70.3333	0	3	0	0.98866	0	248	0.351759
27306	HPGDS	ENSP00000295256	4.56272	0	0.219168	0	1	8	FALSE	3	0	1	0	0.979287	0	0	0
4217	MAP3K5	ENSP00000351908	2.59724	0.00227891	0.385024	0.185771	23	6	FALSE	39.2609	0	23	0	0.990714	0	20042	0.0994262
506	ATP5B	ENSP00000262030	2.43613	0.0025652	0.410487	0.17803	33	5	FALSE	50.1515	0	33	0	0.99165	0	34978	0.0998431
2668	GDNF	ENSP00000409007	4.23705	0	0.236013	0	1	7	FALSE	4	0	1	0	0.98118	0	0	0
2239	GPC4	ENSP00000359864	3.01956	0.000834889	0.331174	0.2	6	6	FALSE	31	0	6	0	0.988258	0	6404	0.201754
4282	MIF	ENSP00000215754	2.58343	7.00194e-05	0.387082	0.4	6	6	FALSE	118.833	0	6	0	0.990794	0	2920	0.287732
940	CD28	ENSP00000324890	3.50633	0	0.285199	0	1	6	FALSE	25	0	1	0	0.985428	0	0	0
2281	FKBP1B	ENSP00000370373	3.35213	4.63008e-06	0.298318	0	2	7	FALSE	32	0	2	0	0.986325	0	66	0.525424
4661	MYT1	ENSP00000327465	3.02301	4.02407e-06	0.330796	0.333333	3	6	FALSE	61	0	3	0	0.988238	0	92	0.40991
2263	FGFR2	ENSP00000410294	2.66974	0.00230013	0.374569	0.27451	18	6	FALSE	39.4444	0	18	0	0.990292	0	18770	0.110489
6850	SYK	ENSP00000364898	2.45224	0.00265058	0.40779	0.206439	33	6	FALSE	44.3939	0	33	0	0.991557	0	29176	0.0898663
1147	CHUK	ENSP00000359424	2.33142	0.00563707	0.428924	0.192414	47	5	FALSE	45.3191	0	47	0	0.992259	0	60032	0.0804958
2554	GABRA1	ENSP00000023897	3.4603	0	0.288992	0	1	6	FALSE	28	0	1	0	0.985696	0	0	0
2268	FGR	ENSP00000363115	2.76985	0.000272884	0.36103	0.355556	10	6	FALSE	50.9	0	10	0	0.98971	0	2938	0.175779
5155	PDGFB	ENSP00000330382	3.1611	0.00025334	0.316345	0.0952381	7	6	FALSE	16.4286	0	7	0	0.987435	0	2058	0.179775
2220	FCN2	ENSP00000291744	0	0	0	0	0	0	TRUE	0	0	0	0	Infinity	0	0	0
7161	TP73	ENSP00000367545	2.51899	0.000874062	0.396985	0.288306	32	6	FALSE	48.5938	0	32	0	0.991169	0	12022	0.108468
10135	NAMPT	ENSP00000222553	2.86191	0.00162041	0.349417	0.238095	7	5	FALSE	44.1429	0	7	0	0.989175	0	10774	0.197309
5294	PIK3CG	ENSP00000352121	3.06444	0.000578132	0.326324	0.107143	8	6	FALSE	20.375	0	8	0	0.987997	0	4918	0.161585
3735	KARS	ENSP00000325448	2.59724	0.00113098	0.385024	0.181818	12	5	FALSE	63.0833	0	12	0	0.990714	0	10712	0.160897
57103	TIGAR	ENSP00000179259	2.74799	0.0023436	0.363903	0	4	6	FALSE	89.25	0	4	0	0.989837	0	10836	0.294167
5836	PYGL	ENSP00000216392	3.01611	0.00251304	0.331553	0.25	8	6	FALSE	22.375	0	8	0	0.988278	0	16796	0.165112
5601	MAPK9	ENSP00000389338	2.51093	0.00169625	0.398258	0.216931	28	6	FALSE	42.8214	0	28	0	0.991216	0	17930	0.0960122
127	ADH4	ENSP00000265512	3.06559	0	0.326201	0	1	7	FALSE	162	0	1	0	0.987991	0	0	0
4086	SMAD1	ENSP00000305769	2.49827	0.00324575	0.400276	0.254902	18	6	FALSE	55.8889	0	18	0	0.991289	0	25096	0.119302
7376	NR1H2	ENSP00000253727	2.82048	0.000716977	0.354549	0.25	16	6	FALSE	33.75	0	16	0	0.989416	0	8066	0.138688
6423	SFRP2	ENSP00000274063	1	0	1	0	1	1	FALSE	1	0	1	0	1	0	0	0
157506	RDH10	ENSP00000240285	0	0	0	0	0	0	TRUE	0	0	0	0	Infinity	0	0	0
7057	THBS1	ENSP00000260356	2.88147	0.00242393	0.347045	0.0909091	12	6	FALSE	23	0	12	0	0.989061	0	16914	0.105039
70	ACTC1	ENSP00000290378	2.50403	0.00472034	0.399357	0.125793	44	5	FALSE	30.3636	0	44	0	0.991256	0	45236	0.0692715
3091	HIF1A	ENSP00000338018	2.27963	0.0250402	0.438667	0.126959	88	6	FALSE	36.5455	0	88	0	0.99256	0	224110	0.0641077
5588		ENSP00000263125	2.89758	0.000136423	0.345115	0.333333	10	6	FALSE	37	0	10	0	0.988968	0	1652	0.176555
5604	MAP2K1	ENSP00000302486	2.72267	0.000278767	0.367287	0.205882	17	6	FALSE	40.1765	0	17	0	0.989984	0	3402	0.127141
54739	XAF1	ENSP00000354822	2.74568	0.000220714	0.364208	0.166667	4	6	FALSE	89.25	0	4	0	0.989851	0	2410	0.289088
1198	CLK3	ENSP00000378505	2.60069	0.000927808	0.384513	0.238095	7	6	FALSE	83.8571	0	7	0	0.990694	0	7138	0.20319
2354	FOSB	ENSP00000245919	3.28539	0	0.304378	1	3	6	FALSE	34	0	3	0	0.986713	0	0	0.485714
5956	OPN1LW	ENSP00000358967	0	0	0	0	0	0	TRUE	0	0	0	0	Infinity	0	0	0
10361	NPM2	ENSP00000289820	3.09896	4.54567e-06	0.322688	0	2	6	FALSE	52	0	2	0	0.987797	0	80	0.554348
317	APAF1	ENSP00000448165	3.11738	1.82697e-05	0.320783	0.3	5	6	FALSE	25.4	0	5	0	0.98769	0	150	0.254545
3481	IGF2	ENSP00000391826	3.8412	0.000210459	0.260336	0	2	8	FALSE	4.5	0	2	0	0.983481	0	1202	0.5
51135	IRAK4	ENSP00000390651	3.15535	3.17048e-05	0.316922	0.3	5	6	FALSE	22.6	0	5	0	0.987469	0	280	0.23871
55662	HIF1AN	ENSP00000299163	2.6122	0.00168583	0.382819	0.184615	26	6	FALSE	40.9615	0	26	0	0.990627	0	15722	0.107672
4973	OLR1	ENSP00000309124	4.30495	0.0023015	0.232291	0	2	7	FALSE	2	0	2	0	0.980785	0	11206	0.5
93517	SDR42E1	ENSP00000332407	3.34868	0	0.298625	0	1	6	FALSE	37	0	1	0	0.986345	0	0	0
5243	ABCB1	ENSP00000265724	2.96893	4.21571e-05	0.336822	0	3	5	FALSE	62.6667	0	3	0	0.988553	0	480	0.354406
1950	EGF	ENSP00000265171	2.81473	0.000114358	0.355274	0.4	6	6	FALSE	63.6667	0	6	0	0.989449	0	1372	0.250656
7018	TF	ENSP00000385834	2.8504	0.0028438	0.350828	0.047619	7	7	FALSE	47.5714	0	7	0	0.989242	0	20188	0.204616
3619	INCENP	ENSP00000378295	2.86997	0.000302075	0.348436	0.333333	6	6	FALSE	43.1667	0	6	0	0.989128	0	2380	0.199225
2944	GSTM1	ENSP00000311469	3.42463	3.51351e-06	0.292003	0	2	7	FALSE	22.5	0	2	0	0.985903	0	30	0.511905
8767	RIPK2	ENSP00000220751	3.11507	3.8427e-05	0.32102	0.1	5	6	FALSE	28.8	0	5	0	0.987703	0	394	0.251786
7042	TGFB2	ENSP00000355896	2.86191	9.44276e-05	0.349417	0.3	5	6	FALSE	56.8	0	5	0	0.989175	0	1132	0.231148
2078	ERG	ENSP00000381891	2.66513	0.000189374	0.375216	0.309091	11	6	FALSE	55.7273	0	11	0	0.990319	0	3008	0.161265
6010	RHO	ENSP00000296271	0	0	0	0	0	0	TRUE	0	0	0	0	Infinity	0	0	0
3000	GUCY2D	ENSP00000254854	0	0	0	0	0	0	TRUE	0	0	0	0	Infinity	0	0	0
1019	CDK4	ENSP00000257904	2.3107	0.0055638	0.432769	0.227041	49	5	FALSE	44.2653	0	49	0	0.99238	0	59142	0.0762751
1452	CSNK1A1	ENSP00000421689	2.38665	0.00310121	0.418997	0.171429	36	5	FALSE	47.5556	0	36	0	0.991938	0	34314	0.0890033
5583		ENSP00000329127	3.0817	1.67195e-05	0.324496	0.5	4	6	FALSE	41	0	4	0	0.987897	0	290	0.312977
5579	PRKCB	ENSP00000305355	2.6168	0.000774729	0.382146	0.242647	17	6	FALSE	47.6471	0	17	0	0.9906	0	8810	0.12605
5580	PRKCD	ENSP00000331602	2.46145	0.00529331	0.406265	0.148148	28	5	FALSE	41.8571	0	28	0	0.991503	0	40230	0.0875262
5581		ENSP00000306124	2.64442	0.000958885	0.378155	0.111111	18	6	FALSE	40.6667	0	18	0	0.990439	0	9212	0.111572
54890	ALKBH5	ENSP00000382091	2.88032	2.1564e-05	0.347183	0.666667	3	6	FALSE	88.6667	0	3	0	0.989068	0	478	0.404871
695	BTK	ENSP00000308176	2.63406	0.00206384	0.379642	0.142857	22	6	FALSE	32.2727	0	22	0	0.9905	0	18410	0.0885299
3162	HMOX1	ENSP00000216117	3.27388	0.0023015	0.305448	0	2	6	FALSE	31	0	2	0	0.98678	0	12718	0.5
6121	RPE65	ENSP00000262340	0	0	0	0	0	0	TRUE	0	0	0	0	Infinity	0	0	0
727	C5	ENSP00000223642	3.27618	0	0.305234	0	1	6	FALSE	61	0	1	0	0.986766	0	0	0
1082	CGB3	ENSP00000349954	3.06559	0	0.326201	0	1	7	FALSE	162	0	1	0	0.987991	0	0	0
54575	UGT1A10	ENSP00000343838	2.97123	0.00496441	0.336561	0.047619	7	7	FALSE	28.2857	0	7	0	0.988539	0	29456	0.152328
9547	CXCL14	ENSP00000337065	2.89413	7.26035e-05	0.345527	0	2	6	FALSE	111.5	0	2	0	0.988988	0	1224	0.528708
249	ALPL	ENSP00000363965	3.32566	3.45265e-05	0.300692	0	2	6	FALSE	22	0	2	0	0.986479	0	196	0.512195
4643	MYO1E	ENSP00000288235	2.76064	0.00128767	0.362234	0.287879	12	6	FALSE	40.5	0	12	0	0.989764	0	10992	0.138603
90	ACVR1	ENSP00000263640	3.2313	0.000248257	0.309473	0.25	9	6	FALSE	10.3333	0	9	0	0.987027	0	2090	0.164021
6777	STAT5B	ENSP00000293328	2.58228	0.000821864	0.387255	0.333333	13	5	FALSE	57.7692	0	13	0	0.990801	0	9754	0.141403
83903	GSG2	ENSP00000325290	2.95282	0.000555395	0.338659	0.133333	6	7	FALSE	37.3333	0	6	0	0.988646	0	2580	0.184167
5371	PML	ENSP00000268058	2.26467	0.00816972	0.441565	0.203955	60	5	FALSE	49.3833	0	60	0	0.992647	0	87312	0.0810345
6774	STAT3	ENSP00000264657	2.26812	0.0135813	0.440893	0.163257	69	5	FALSE	42.4638	0	69	0	0.992627	0	127636	0.0707005
7403	KDM6A	ENSP00000367203	2.76295	0.000142077	0.361933	0	5	6	FALSE	81.6	0	5	0	0.98975	0	2664	0.267774
6329	SCN4A	ENSP00000396320	0	0	0	0	0	0	TRUE	0	0	0	0	Infinity	0	0	0
351	APP	ENSP00000284981	2.06674	0.130572	0.483853	0.0287555	162	6	FALSE	19.3272	0	162	0	0.993798	0	832662	0.0301328
333	APLP1	ENSP00000221891	3.05063	2.21839e-05	0.327801	0.3	5	6	FALSE	40.2	0	5	0	0.988078	0	254	0.272109
10881	ACTL7A	ENSP00000334300	3.06559	0	0.326201	0	1	7	FALSE	162	0	1	0	0.987991	0	0	0
7020	TFAP2A	ENSP00000368924	2.51093	0.00128317	0.398258	0.245059	23	6	FALSE	53.913	0	23	0	0.991216	0	15272	0.118299
3248	HPGD	ENSP00000296522	3.06559	0	0.326201	0	1	7	FALSE	162	0	1	0	0.987991	0	0	0
7058	THBS2	ENSP00000355751	3.73878	3.85504e-06	0.267467	0.666667	3	7	FALSE	8.66667	0	3	0	0.984077	0	32	0.481481
338	APOB	ENSP00000233242	2.81243	0.0012651	0.355565	0.142857	8	6	FALSE	43	0	8	0	0.989463	0	9952	0.165856
1436	CSF1R	ENSP00000286301	2.99194	2.6144e-05	0.334231	0.392857	8	6	FALSE	37.25	0	8	0	0.988419	0	436	0.234277
2719	GPC3	ENSP00000377836	0	0	0	0	0	0	TRUE	0	0	0	0	Infinity	0	0	0
7408	VASP	ENSP00000245932	2.60759	0.000189986	0.383495	0.333333	10	6	FALSE	77.8	0	10	0	0.990654	0	3956	0.19597
23135	KDM6B	ENSP00000254846	3.01036	0.00242651	0.332187	0.0833333	9	6	FALSE	22	0	9	0	0.988312	0	17588	0.167979
25953	PNKD	ENSP00000273077	2.73418	0.000335085	0.365741	0.133333	6	6	FALSE	68.6667	0	6	0	0.989918	0	2664	0.207194
466	ATF1	ENSP00000262053	3.07595	7.27184e-06	0.325103	0.5	4	6	FALSE	36.25	0	4	0	0.987931	0	88	0.326577
4436	MSH2	ENSP00000233146	2.45915	0.000608799	0.406645	0.304348	24	5	FALSE	64.0417	0	24	0	0.991517	0	12282	0.129377
7368	UGT8	ENSP00000311648	4.27273	0	0.234043	0	1	7	FALSE	2	0	1	0	0.980973	0	0	0
1789	DNMT3B	ENSP00000328547	2.91254	0.000270003	0.343343	0.355556	10	6	FALSE	45.3	0	10	0	0.988881	0	2424	0.205936
5664	PSEN2	ENSP00000355747	2.87112	0.00096658	0.348297	0.0714286	8	6	FALSE	34	0	8	0	0.989121	0	4780	0.147577
5948	RBP2	ENSP00000232217	0	0	0	0	0	0	TRUE	0	0	0	0	Infinity	0	0	0
1382	CRABP2	ENSP00000357204	3.16226	0.00010704	0.31623	0.333333	3	6	FALSE	38	0	3	0	0.987429	0	948	0.369281
1499	CTNNB1	ENSP00000344456	2.0817	0.0252182	0.480376	0.14495	101	5	FALSE	44.0099	0	101	0	0.993711	0	258348	0.0620453
5925	RB1	ENSP00000267163	2.28884	0.00895861	0.436903	0.160563	71	5	FALSE	40.3239	0	71	0	0.992507	0	98198	0.0688817
1026	CDKN1A	ENSP00000244741	2.32451	0.00846048	0.430198	0.171531	63	6	FALSE	40.8889	0	63	0	0.992299	0	79612	0.0728574
4140	MARK3	ENSP00000411397	2.6893	0.0010684	0.371844	0.212121	12	5	FALSE	48.3333	0	12	0	0.990178	0	9250	0.143781
1558	CYP2C8	ENSP00000360317	3.88262	0	0.257558	0	1	7	FALSE	12	0	1	0	0.983241	0	0	0
1562	CYP2C18	ENSP00000285979	3.70656	0.000277035	0.269792	0	3	6	FALSE	9.66667	0	3	0	0.984264	0	1786	0.333333
250	ALPP	ENSP00000375881	0	0	0	0	0	0	TRUE	0	0	0	0	Infinity	0	0	0
8797	TNFRSF10A	ENSP00000221132	3.38435	0.000230486	0.295478	0.535714	8	7	FALSE	16.25	0	8	0	0.986138	0	1326	0.238971
1017	CDK2	ENSP00000266970	2.26467	0.0207431	0.441565	0.1112	87	5	FALSE	33	0	87	0	0.992647	0	181840	0.0570139
1152	CKB	ENSP00000299198	2.6916	0.000885881	0.371526	0.152381	15	5	FALSE	41.4	0	15	0	0.990165	0	7734	0.123524
2203	FBP1	ENSP00000364475	2.95397	0.00231937	0.338527	0	6	6	FALSE	35.8333	0	6	0	0.98864	0	14788	0.215021
6328	SCN3A	ENSP00000283254	3.60644	1.19895e-05	0.277281	0	3	7	FALSE	9.66667	0	3	0	0.984846	0	64	0.45614
220	ALDH1A3	ENSP00000332256	3.27618	0.0023015	0.305234	0	2	7	FALSE	44.5	0	2	0	0.986766	0	18768	0.5
3949	LDLR	ENSP00000454071	0	0	0	0	0	0	TRUE	0	0	0	0	Infinity	0	0	0
1386	ATF2	ENSP00000264110	2.4672	0.00372882	0.405317	0.154878	41	6	FALSE	38.122	0	41	0	0.99147	0	36108	0.0797157
4088	SMAD3	ENSP00000332973	2.29574	0.0141911	0.435589	0.159441	66	6	FALSE	40.5606	0	66	0	0.992467	0	130826	0.0697596
2986	GUCY2F	ENSP00000218006	0	0	0	0	0	0	TRUE	0	0	0	0	Infinity	0	0	0
7097	TLR2	ENSP00000260010	2.94937	0.000325058	0.339056	0.333333	4	6	FALSE	50.5	0	4	0	0.988666	0	2020	0.279167
896	CCND3	ENSP00000362082	2.61795	0.00157528	0.381978	0.205263	20	6	FALSE	40.15	0	20	0	0.990593	0	13890	0.104843
4313	MMP2	ENSP00000219070	2.95052	0.000966171	0.338924	0.190476	7	6	FALSE	29.2857	0	7	0	0.98866	0	9708	0.177914
1576	CYP3A4	ENSP00000337915	3.44994	0.00723088	0.28986	0.0666667	6	6	FALSE	8	0	6	0	0.985756	0	51080	0.188034
1445	CSK	ENSP00000220003	2.69965	0.000938178	0.370418	0.308333	16	6	FALSE	45.5625	0	16	0	0.990118	0	10098	0.138298
81671	VMP1	ENSP00000262291	2.93326	0.000166696	0.340918	0	3	6	FALSE	69.3333	0	3	0	0.98876	0	1258	0.363475
3480	IGF1R	ENSP00000268035	2.37745	0.00322926	0.42062	0.243952	32	5	FALSE	54.1875	0	32	0	0.991992	0	34256	0.0992445
2982	GUCY1A3	ENSP00000296518	2.86766	0.000164791	0.348716	0.333333	4	6	FALSE	74	0	4	0	0.989141	0	954	0.317888
1956	EGFR	ENSP00000275493	2.00115	0.0817049	0.499712	0.0773366	156	5	FALSE	30.3846	0	156	0	0.994179	0	573554	0.0423471
405	ARNT	ENSP00000351407	2.34522	0.00683111	0.426398	0.206531	50	6	FALSE	46.42	0	50	0	0.992179	0	62400	0.0824911
80351	TNKS2	ENSP00000360689	3.01726	5.43746e-05	0.331426	0	4	6	FALSE	41.25	0	4	0	0.988272	0	562	0.277586
5111	PCNA	ENSP00000368438	2.35903	0.00945039	0.423902	0.141156	49	5	FALSE	40.5714	0	49	0	0.992099	0	80236	0.0748425
1647	GADD45A	ENSP00000360025	2.63521	0.000308384	0.379476	0.247619	15	6	FALSE	54.2667	0	15	0	0.990493	0	3900	0.144533
4303	FOXO4	ENSP00000363377	2.7687	6.34702e-05	0.36118	0.527778	9	6	FALSE	60.6667	0	9	0	0.989717	0	1076	0.209195
2309	FOXO3	ENSP00000339527	2.46951	0.00123085	0.404939	0.23	25	6	FALSE	55.96	0	25	0	0.991456	0	15432	0.114438
6817	SULT1A1	ENSP00000321988	2.96318	0.00286393	0.337476	0.2	5	6	FALSE	35	0	5	0	0.988586	0	15008	0.205952
6788	STK3	ENSP00000390500	2.83774	0.000305396	0.352393	0.230769	13	6	FALSE	33.6923	0	13	0	0.989315	0	2840	0.131523
6789	STK4	ENSP00000361892	2.69275	0.000205562	0.371368	0.230769	14	6	FALSE	47.5	0	14	0	0.990158	0	2774	0.143723
5335	PLCG1	ENSP00000244007	2.51899	0.00297748	0.396985	0.228571	36	5	FALSE	38.3611	0	36	0	0.991169	0	28186	0.0869866
835	CASP2	ENSP00000312664	3.1588	0.000267729	0.316576	0.321429	8	6	FALSE	24.125	0	8	0	0.987449	0	1924	0.204741
3791	KDR	ENSP00000263923	2.66398	0.000838929	0.375378	0.227273	12	6	FALSE	48.25	0	12	0	0.990326	0	6116	0.138569
4967	OGDH	ENSP00000222673	2.81128	6.15343e-06	0.35571	0.666667	3	5	FALSE	119.333	0	3	0	0.989469	0	390	0.443618
2902	GRIN1	ENSP00000360608	3.13924	0.000383494	0.318548	0.2	5	6	FALSE	26	0	5	0	0.987563	0	2582	0.224561
8788	DLK1	ENSP00000340292	3.27043	9.67763e-05	0.305771	0	4	6	FALSE	15.25	0	4	0	0.9868	0	648	0.268868
5578	PRKCA	ENSP00000408695	2.49137	0.0128453	0.401386	0.122984	32	5	FALSE	35.7812	0	32	0	0.991329	0	96356	0.0784003
2099	ESR1	ENSP00000206249	2.15305	0.0243083	0.464458	0.120457	108	6	FALSE	38.1574	0	108	0	0.993296	0	245652	0.0584198
115	ADCY9	ENSP00000294016	3.05869	1.2355e-05	0.326938	0	3	6	FALSE	47	0	3	0	0.988031	0	194	0.377049
2260	FGFR1	ENSP00000393312	2.57998	0.00403197	0.3876	0.159274	32	6	FALSE	35.4375	0	32	0	0.990814	0	38384	0.0867034
4644	MYO5A	ENSP00000382177	2.6916	0.000670168	0.371526	0.393939	12	5	FALSE	53.4167	0	12	0	0.990165	0	8704	0.158978
10157	AASS	ENSP00000377040	3.83084	0	0.261039	0	1	6	FALSE	6	0	1	0	0.983542	0	0	0
7040	TGFB1	ENSP00000221930	2.51208	0.00524735	0.398076	0.119048	28	5	FALSE	36.0714	0	28	0	0.991209	0	43460	0.0808989
5211	PFKL	ENSP00000269848	2.43843	0.00410063	0.410099	0.308824	17	5	FALSE	65.2353	0	17	0	0.991637	0	32004	0.127797
355	FAS	ENSP00000347979	2.66513	0.0011485	0.375216	0.233202	23	6	FALSE	36.3913	0	23	0	0.990319	0	11718	0.104874
86	ACTL6A	ENSP00000397552	2.55811	0.000552812	0.390913	0.381818	11	5	FALSE	84.3636	0	11	0	0.990941	0	6094	0.194835
7006	TEC	ENSP00000370912	3.09781	3.16885e-05	0.322808	0.47619	7	6	FALSE	35.8571	0	7	0	0.987803	0	444	0.245597
4843	NOS2	ENSP00000327251	2.87572	0.000706559	0.347739	0.0666667	10	6	FALSE	32.8	0	10	0	0.989095	0	7538	0.161
3688		ENSP00000303351	2.55006	0.00247812	0.392148	0.186147	22	5	FALSE	43.7273	0	22	0	0.990988	0	20496	0.104535
79068	FTO	ENSP00000418823	3.23705	9.05528e-06	0.308923	0.333333	3	6	FALSE	22.6667	0	3	0	0.986994	0	56	0.391813
57016	AKR1B10	ENSP00000352584	3.26697	1.95555e-05	0.306094	0	3	6	FALSE	29.6667	0	3	0	0.98682	0	206	0.382222
9610	RIN1	ENSP00000310406	2.80207	0.000309438	0.356879	0.472222	9	6	FALSE	50.5556	0	9	0	0.989523	0	2608	0.192112
54922	RASIP1	ENSP00000222145	0	0	0	0	0	0	TRUE	0	0	0	0	Infinity	0	0	0
2908	NR3C1	ENSP00000231509	2.4603	0.00446536	0.406455	0.182927	41	6	FALSE	43.2927	0	41	0	0.99151	0	50874	0.0907973
316	AOX1	ENSP00000363832	3.58688	0	0.278794	0	1	6	FALSE	24	0	1	0	0.98496	0	0	0
51110	LACTB2	ENSP00000276590	3.54776	1.3187e-05	0.281868	0	3	6	FALSE	5.66667	0	3	0	0.985187	0	170	0.358974
5208	PFKFB2	ENSP00000356047	3.40276	1.29364e-05	0.293879	0	3	7	FALSE	9	0	3	0	0.98603	0	46	0.333333
6514	SLC2A2	ENSP00000323568	3.05293	3.78328e-05	0.327554	0	2	7	FALSE	85	0	2	0	0.988064	0	282	0.512195
9833	MELK	ENSP00000298048	3.1588	3.86083e-06	0.316576	0.333333	3	6	FALSE	28.6667	0	3	0	0.987449	0	36	0.382883
5563	PRKAA2	ENSP00000360290	2.90219	0.000483166	0.344568	0.0989011	14	6	FALSE	22.9286	0	14	0	0.988941	0	3220	0.112093
6258	RXRG	ENSP00000352900	3.18182	6.58685e-05	0.314286	0.290909	11	6	FALSE	20.0909	0	11	0	0.987315	0	1006	0.205009
154	ADRB2	ENSP00000305372	2.68009	0.00475206	0.373122	0.083004	23	6	FALSE	34.2609	0	23	0	0.990232	0	47518	0.103079
2896	GRN	ENSP00000053867	2.58343	0.00270045	0.387082	0.117647	17	5	FALSE	47.2353	0	17	0	0.990794	0	20738	0.116914
4645	MYO5B	ENSP00000285039	2.79977	0.000314123	0.357172	0.285714	7	6	FALSE	54.8571	0	7	0	0.989536	0	2654	0.20989
5315	PKM	ENSP00000320171	2.3107	0.00909046	0.432769	0.147992	44	5	FALSE	47.6591	0	44	0	0.99238	0	83742	0.0812519
4035	LRP1	ENSP00000243077	2.66053	0.00529341	0.375865	0.0879121	14	6	FALSE	35	0	14	0	0.990346	0	32840	0.0998353
26275	HIBCH	ENSP00000352706	3.29344	2.07409e-05	0.303634	0	3	6	FALSE	18.3333	0	3	0	0.986666	0	122	0.353741
58191	CXCL16	ENSP00000293778	2.89413	7.26035e-05	0.345527	0	2	6	FALSE	111.5	0	2	0	0.988988	0	1224	0.528708
3984	LIMK1	ENSP00000336740	2.8412	0.000228453	0.351964	0.190476	7	7	FALSE	49	0	7	0	0.989295	0	2674	0.185932
558	AXL	ENSP00000301178	2.82624	2.81725e-05	0.353827	0.333333	7	6	FALSE	54.5714	0	7	0	0.989382	0	530	0.220046
641371	ACOT1	ENSP00000311224	2.89068	0.000616349	0.345939	0.190476	7	5	FALSE	43.5714	0	7	0	0.989008	0	4834	0.19153
3339	HSPG2	ENSP00000363827	3.28884	0.000132544	0.304059	0	3	7	FALSE	28	0	3	0	0.986693	0	1300	0.346154
5058	PAK1	ENSP00000278568	2.47986	0.0038184	0.403248	0.163333	25	6	FALSE	47.84	0	25	0	0.991396	0	30042	0.0994167
32	ACACB	ENSP00000341044	2.91369	4.33939e-05	0.343207	0.333333	4	6	FALSE	59.75	0	4	0	0.988874	0	524	0.305128
10257	ABCC4	ENSP00000366084	2.94591	1.03251e-05	0.339453	0.666667	3	6	FALSE	78.6667	0	3	0	0.988687	0	366	0.393333
2868	GRK4	ENSP00000381129	3.67894	0	0.271817	0	1	7	FALSE	23	0	1	0	0.984425	0	0	0
54583	EGLN1	ENSP00000355601	2.82624	0.000157903	0.353827	0.190476	7	6	FALSE	53.4286	0	7	0	0.989382	0	1558	0.21371
345651	ACTBL2	ENSP00000416706	2.58343	0.00234465	0.387082	0.185714	21	6	FALSE	41	0	21	0	0.990794	0	20810	0.0984509
4619	MYH1	ENSP00000226207	3.04833	0.000125814	0.328048	0	4	6	FALSE	43.25	0	4	0	0.988091	0	1234	0.281667
3667	IRS1	ENSP00000304895	2.37629	0.00170638	0.420823	0.237903	32	6	FALSE	54.0938	0	32	0	0.991998	0	25256	0.0974662
6389	SDHA	ENSP00000264932	2.56272	0.00121832	0.390211	0.22381	21	5	FALSE	43.619	0	21	0	0.990914	0	11374	0.105615
8651	SOCS1	ENSP00000329418	2.57998	0.00250542	0.3876	0.193122	28	6	FALSE	36.6071	0	28	0	0.990814	0	24722	0.091888
5747	PTK2	ENSP00000341189	2.33487	0.00341206	0.42829	0.238866	39	5	FALSE	50.1538	0	39	0	0.992239	0	42234	0.086727
2906	GRIN2D	ENSP00000263269	0	0	0	0	0	0	TRUE	0	0	0	0	Infinity	0	0	0
5599	MAPK8	ENSP00000353483	2.32566	0.00870092	0.429985	0.142771	58	6	FALSE	40.1724	0	58	0	0.992293	0	86998	0.0713236
56648	EIF5A2	ENSP00000295822	3.08055	7.73323e-05	0.324617	0.333333	3	6	FALSE	61	0	3	0	0.987904	0	464	0.386412
978	CDA	ENSP00000364212	3.47871	2.43994e-06	0.287463	0	2	6	FALSE	16	0	2	0	0.985589	0	22	0.555556
3717	JAK2	ENSP00000371067	2.60414	0.00129309	0.384004	0.261905	28	5	FALSE	40.9643	0	28	0	0.990674	0	16264	0.107237
9227	LRAT	ENSP00000337224	0	0	0	0	0	0	TRUE	0	0	0	0	Infinity	0	0	0
3726	JUNB	ENSP00000303315	2.89298	0.000309218	0.345664	0.363636	12	6	FALSE	32.0833	0	12	0	0.988994	0	3304	0.152711
4000	LMNA	ENSP00000357283	2.27733	0.0330593	0.439111	0.0994536	61	5	FALSE	33.2131	0	61	0	0.992574	0	214722	0.057164
4001	LMNB1	ENSP00000261366	2.50863	0.00340326	0.398624	0.155797	24	5	FALSE	43.7917	0	24	0	0.991229	0	28718	0.098221
5915	RARB	ENSP00000332296	3.03567	0.000111155	0.329416	0.25	9	6	FALSE	26.7778	0	9	0	0.988165	0	1556	0.190476
6720	SREBF1	ENSP00000348069	2.80552	0.000369032	0.35644	0.30303	12	6	FALSE	42.75	0	12	0	0.989503	0	3630	0.161006
5585		ENSP00000343325	2.86536	8.48397e-05	0.348996	0.133333	6	5	FALSE	51.1667	0	6	0	0.989155	0	1060	0.214689
1051	CEBPB	ENSP00000305422	2.52704	0.00118041	0.395719	0.307882	29	6	FALSE	50.5862	0	29	0	0.991122	0	15162	0.113933
613	BCR	ENSP00000303507	2.51899	0.00192921	0.396985	0.163399	18	5	FALSE	53.2778	0	18	0	0.991169	0	17426	0.117886
596	BCL2	ENSP00000329623	2.59494	0.0010528	0.385366	0.215385	26	6	FALSE	42.7308	0	26	0	0.990727	0	11914	0.108909
8228	PNPLA4	ENSP00000370430	3.74684	0	0.266892	0	1	7	FALSE	4	0	1	0	0.98403	0	0	0
54578	UGT1A6	ENSP00000303174	4.44879	0	0.22478	0	1	7	FALSE	6	0	1	0	0.979949	0	0	0
760	CA2	ENSP00000285379	3.2313	2.69441e-06	0.309473	0	2	6	FALSE	42	0	2	0	0.987027	0	40	0.518987
4790	NFKB1	ENSP00000226574	2.57307	0.00111101	0.38864	0.266667	36	6	FALSE	41.4722	0	36	0	0.990854	0	15286	0.102909
1071	CETP	ENSP00000200676	3.05984	0	0.326815	0	1	7	FALSE	172	0	1	0	0.988024	0	0	0
1786	DNMT1	ENSP00000352516	2.50403	0.00133916	0.399357	0.326154	26	5	FALSE	55	0	26	0	0.991256	0	16032	0.120182
240	ALOX5	ENSP00000363512	2.86076	0.00284489	0.349558	0.047619	7	6	FALSE	38.8571	0	7	0	0.989182	0	14914	0.163703
84264	HAGHL	ENSP00000374353	3.50403	0	0.285386	0	1	6	FALSE	26	0	1	0	0.985442	0	0	0
1806	DPYD	ENSP00000359211	3.87917	0	0.257787	0	1	7	FALSE	12	0	1	0	0.983261	0	0	0
2821	GPI	ENSP00000405573	2.84005	0.00199114	0.352107	0.178571	8	5	FALSE	51.125	0	8	0	0.989302	0	15018	0.190075
6098	ROS1	ENSP00000357494	3.54545	0	0.282051	0	1	6	FALSE	30	0	1	0	0.985201	0	0	0
995	CDC25C	ENSP00000321656	2.63521	0.000597284	0.379476	0.163743	19	6	FALSE	44.3158	0	19	0	0.990493	0	7010	0.11945
5644		ENSP00000308720	3.34522	1.66982e-05	0.298934	0	2	7	FALSE	26	0	2	0	0.986365	0	94	0.510204
6334	SCN8A	ENSP00000346534	0	0	0	0	0	0	TRUE	0	0	0	0	Infinity	0	0	0
1455		ENSP00000255641	2.86191	0.000710002	0.349417	0.238095	7	7	FALSE	43.2857	0	7	0	0.989175	0	4040	0.174797
10891	PPARGC1A	ENSP00000264867	2.52934	0.000991514	0.395359	0.27619	21	6	FALSE	54.1905	0	21	0	0.991108	0	13200	0.11989
109	ADCY3	ENSP00000260600	3.3107	1.21467e-05	0.302051	0	2	7	FALSE	23	0	2	0	0.986566	0	82	0.511628
57665	RDH14	ENSP00000370648	0	0	0	0	0	0	TRUE	0	0	0	0	Infinity	0	0	0
133688	UGT3A1	ENSP00000274278	0	0	0	0	0	0	TRUE	0	0	0	0	Infinity	0	0	0
6257	RXRB	ENSP00000363812	3.16686	8.99376e-05	0.31577	0.145455	11	6	FALSE	20.2727	0	11	0	0.987402	0	1326	0.193182
5909	RAP1GAP	ENSP00000290101	3.40391	1.83757e-05	0.29378	0	3	7	FALSE	16	0	3	0	0.986024	0	96	0.333333
7272	TTK	ENSP00000358813	2.48216	0.000269535	0.402874	0.311111	10	5	FALSE	97.7	0	10	0	0.991383	0	7690	0.199388
6095	RORA	ENSP00000261523	3.01956	5.63065e-05	0.331174	0.2	5	6	FALSE	44.2	0	5	0	0.988258	0	646	0.27205
336	APOA2	ENSP00000356969	2.83774	0.000318269	0.352393	0.266667	6	6	FALSE	49.6667	0	6	0	0.989315	0	2922	0.205556
3156	HMGCR	ENSP00000287936	0	0	0	0	0	0	TRUE	0	0	0	0	Infinity	0	0	0
6622	SNCA	ENSP00000338345	2.45685	0.00501435	0.407026	0.144086	31	6	FALSE	45.3226	0	31	0	0.99153	0	43950	0.0918013
112483	SAT2	ENSP00000269298	3.25777	0	0.306959	1	2	7	FALSE	49	0	2	0	0.986873	0	0	0.526882
2324	FLT4	ENSP00000261937	3.02647	2.53318e-05	0.330418	0.333333	4	6	FALSE	40.5	0	4	0	0.988218	0	278	0.281469
4093	SMAD9	ENSP00000369154	2.9229	0.000295567	0.342126	0.133333	10	6	FALSE	28.9	0	10	0	0.98882	0	2836	0.158333
5970	RELA	ENSP00000384273	2.26467	0.0149813	0.441565	0.146944	82	5	FALSE	39.0488	0	82	0	0.992647	0	137052	0.0670103
9619	ABCG1	ENSP00000354995	0	0	0	0	0	0	TRUE	0	0	0	0	Infinity	0	0	0
894	CCND2	ENSP00000261254	2.49252	0.001554	0.4012	0.28475	39	6	FALSE	42.3077	0	39	0	0.991323	0	20358	0.090734
2353	FOS	ENSP00000306245	2.41082	0.00347704	0.414797	0.221591	33	5	FALSE	47.7879	0	33	0	0.991798	0	36542	0.0923744
84444	DOT1L	ENSP00000381657	2.95052	3.6585e-05	0.338924	0.3	5	6	FALSE	48.2	0	5	0	0.98866	0	452	0.278613
247	ALOX15B	ENSP00000369530	3.28423	0	0.304485	1	2	6	FALSE	39.5	0	2	0	0.98672	0	0	0.637097
7296	TXNRD1	ENSP00000434516	2.66283	2.5026e-05	0.37554	0.5	5	5	FALSE	119	0	5	0	0.990332	0	1566	0.326923
207	AKT1	ENSP00000270202	2.1542	0.0219163	0.464209	0.133154	106	6	FALSE	38.3491	0	106	0	0.99329	0	209752	0.0584445
208	AKT2	ENSP00000375892	2.54776	0.00314726	0.392502	0.163743	19	6	FALSE	44.3684	0	19	0	0.991001	0	21646	0.103419
6885	MAP3K7	ENSP00000358335	2.53049	0.00374731	0.39518	0.121839	30	6	FALSE	34.3	0	30	0	0.991102	0	30288	0.0786973
25989	ULK3	ENSP00000400312	3.81128	0	0.262379	0	1	7	FALSE	21	0	1	0	0.983655	0	0	0
1208	CLPS	ENSP00000259938	0	0	0	0	0	0	TRUE	0	0	0	0	Infinity	0	0	0
2913	GRM3	ENSP00000355316	0	0	0	0	0	0	TRUE	0	0	0	0	Infinity	0	0	0
4233	MET	ENSP00000317272	2.55926	0.00037699	0.390737	0.4329	22	6	FALSE	55.2727	0	22	0	0.990935	0	6444	0.129444
10765	KDM5B	ENSP00000356234	2.87112	0.00194708	0.348297	0.263736	14	6	FALSE	35.2143	0	14	0	0.989121	0	18694	0.158766
2321	FLT1	ENSP00000282397	3.30495	3.23114e-06	0.302577	0.666667	3	6	FALSE	20	0	3	0	0.986599	0	28	0.384615
404281	YY2	ENSP00000389381	3.05984	0	0.326815	0	1	7	FALSE	172	0	1	0	0.988024	0	0	0
4641	MYO1C	ENSP00000352834	2.41197	0.00128839	0.414599	0.272487	28	5	FALSE	57.3929	0	28	0	0.991791	0	19524	0.10946
2322	FLT3	ENSP00000241453	2.98619	1.35318e-05	0.334875	0.333333	6	6	FALSE	44.1667	0	6	0	0.988452	0	212	0.267677
4090	SMAD5	ENSP00000441954	3.03337	0.000100665	0.329666	0.7	5	6	FALSE	43.2	0	5	0	0.988178	0	960	0.302098
4851	NOTCH1	ENSP00000277541	2.47756	0.00240835	0.403623	0.187831	28	6	FALSE	49.25	0	28	0	0.99141	0	23962	0.1031
8242	KDM5C	ENSP00000364550	2.87802	6.3009e-05	0.347461	0.305556	9	6	FALSE	47.4444	0	9	0	0.989081	0	968	0.21131
5465	PPARA	ENSP00000262735	2.90679	0.000149836	0.344022	0.363636	11	6	FALSE	36.4545	0	11	0	0.988914	0	2828	0.176523
6261	RYR1	ENSP00000352608	3.06329	4.6964e-05	0.326446	0	2	6	FALSE	77	0	2	0	0.988004	0	340	0.503311
5290	PIK3CA	ENSP00000263967	2.50748	0.00369374	0.398807	0.223333	25	5	FALSE	52.88	0	25	0	0.991236	0	32656	0.114783
335	APOA1	ENSP00000236850	2.67204	0.00273214	0.374246	0.175824	14	6	FALSE	36	0	14	0	0.990279	0	19780	0.10008
1969	EPHA2	ENSP00000351209	2.40391	0.0017304	0.415989	0.356855	32	6	FALSE	51.6562	0	32	0	0.991838	0	22398	0.0970395
5226	PGD	ENSP00000270776	2.95742	6.82648e-05	0.338132	0.142857	7	6	FALSE	37.8571	0	7	0	0.98862	0	864	0.209896
3958	LGALS3	ENSP00000254301	2.45455	0.00826034	0.407407	0.114625	23	6	FALSE	41.4783	0	23	0	0.991543	0	46432	0.0851599
153364	MBLAC2	ENSP00000314776	3.22555	0.000576551	0.310025	0	4	6	FALSE	20.25	0	4	0	0.987061	0	4526	0.253289
5140	PDE3B	ENSP00000282096	3.57537	0	0.279691	0	1	6	FALSE	24	0	1	0	0.985027	0	0	0
79813	EHMT1	ENSP00000417980	2.80552	0.00021563	0.35644	0.571429	8	6	FALSE	59.625	0	8	0	0.989503	0	2074	0.222846
2241	FER	ENSP00000281092	2.79287	1.28013e-06	0.358055	0.9	5	6	FALSE	88.6	0	5	0	0.989576	0	44	0.326937
1454	CSNK1E	ENSP00000352929	2.51438	0.00354366	0.397712	0.0857143	21	5	FALSE	36.0476	0	21	0	0.991195	0	25496	0.0805448
5594	MAPK1	ENSP00000215832	2.27158	0.0111875	0.440223	0.127719	76	5	FALSE	36.7368	0	76	0	0.992607	0	111828	0.0621382
3586	IL10	ENSP00000412237	0	0	0	0	0	0	TRUE	0	0	0	0	Infinity	0	0	0
2649	NR6A1	ENSP00000420267	0	0	0	0	0	0	TRUE	0	0	0	0	Infinity	0	0	0
140469	MYO3B	ENSP00000386213	0	0	0	0	0	0	TRUE	0	0	0	0	Infinity	0	0	0
367	AR	ENSP00000363822	2.40506	0.00635966	0.415789	0.184766	52	6	FALSE	42.9615	0	52	0	0.991831	0	67746	0.0841252
10062	NR1H3	ENSP00000387946	2.6939	0.00296203	0.371209	0.228571	15	5	FALSE	41.6	0	15	0	0.990152	0	23558	0.127013
51776	MAP3K20	ENSP00000364361	2.99194	5.87841e-05	0.334231	0.333333	3	6	FALSE	65	0	3	0	0.988419	0	510	0.363296
6799	SULT1A2	ENSP00000338742	3.7687	0	0.265344	1	2	7	FALSE	4.5	0	2	0	0.983903	0	0	0.75
7294	TXK	ENSP00000264316	3.23015	0	0.309583	1	2	6	FALSE	64.5	0	2	0	0.987034	0	0	0.614286
5170	PDPK1	ENSP00000344220	2.71116	0.00111708	0.368846	0.171429	15	6	FALSE	36.5333	0	15	0	0.990051	0	7646	0.110772
494551	WEE2	ENSP00000380675	0	0	0	0	0	0	TRUE	0	0	0	0	Infinity	0	0	0
5590	PRKCZ	ENSP00000367830	2.51669	0.00177656	0.397348	0.214286	28	6	FALSE	48.6429	0	28	0	0.991182	0	18864	0.107776
4249	MGAT5	ENSP00000281923	0	0	0	0	0	0	TRUE	0	0	0	0	Infinity	0	0	0
8445	DYRK2	ENSP00000342105	2.73763	0.000260524	0.36528	0.111111	9	6	FALSE	47.5556	0	9	0	0.989898	0	2718	0.154321
2735	GLI1	ENSP00000228682	2.70771	0.00257682	0.369316	0.217949	13	6	FALSE	50.1538	0	13	0	0.990071	0	18336	0.15625
8877	SPHK1	ENSP00000313681	3.6191	3.42585e-05	0.276312	0	3	7	FALSE	11	0	3	0	0.984773	0	170	0.333333
283848	CES4A	ENSP00000444052	3	0	0.333333	0	1	6	FALSE	156	0	1	0	0.988372	0	0	0
3630	INS	ENSP00000250971	2.78366	5.20543e-05	0.359239	0	4	6	FALSE	85.75	0	4	0	0.98963	0	1110	0.307065
1728	NQO1	ENSP00000319788	2.72497	0.000169342	0.366976	0.222222	9	6	FALSE	56.6667	0	9	0	0.989971	0	2192	0.185919
55930	MYO5C	ENSP00000261839	3.10242	0.00468134	0.322329	0.309091	11	6	FALSE	19.8182	0	11	0	0.987777	0	50848	0.176904
5934	RBL2	ENSP00000262133	2.75144	0.000529778	0.363446	0.28655	19	6	FALSE	38.0526	0	19	0	0.989817	0	6064	0.129513
6256	RXRA	ENSP00000419692	2.55696	0.00424522	0.391089	0.19973	39	5	FALSE	33.9231	0	39	0	0.990948	0	44934	0.0838411
57787	MARK4	ENSP00000262891	2.98159	3.75863e-05	0.335392	0.380952	7	6	FALSE	33.8571	0	7	0	0.988479	0	464	0.211607
3053	SERPIND1	ENSP00000215727	3.04718	0.000145353	0.328172	0	2	7	FALSE	84.5	0	2	0	0.988098	0	568	0.503012
5927	KDM5A	ENSP00000382688	2.73418	8.46133e-05	0.365741	0.444444	9	6	FALSE	66.1111	0	9	0	0.989918	0	2022	0.209877
145447	ABHD12B	ENSP00000336693	0	0	0	0	0	0	TRUE	0	0	0	0	Infinity	0	0	0
10121	ACTR1A	ENSP00000358921	2.80092	0.000442713	0.357025	0.361111	9	5	FALSE	47.6667	0	9	0	0.98953	0	3654	0.180135
6502	SKP2	ENSP00000274255	2.60644	0.00164591	0.383664	0.185383	34	6	FALSE	36.3824	0	34	0	0.99066	0	17540	0.0937832
55239	OGFOD1	ENSP00000457258	3.42578	1.81537e-05	0.291905	0.333333	4	6	FALSE	11.75	0	4	0	0.985897	0	114	0.310811
4626	MYH8	ENSP00000384330	3.31185	4.31036e-05	0.301946	0	2	7	FALSE	39	0	2	0	0.986559	0	380	0.513514
58489	ABHD17C	ENSP00000258884	0	0	0	0	0	0	TRUE	0	0	0	0	Infinity	0	0	0
3551	IKBKB	ENSP00000430684	2.43613	0.00428863	0.410487	0.183832	43	6	FALSE	40.2791	0	43	0	0.99165	0	43168	0.0821073
3484	IGFBP1	ENSP00000275525	4.15535	2.5401e-05	0.240654	0	2	8	FALSE	4	0	2	0	0.981655	0	46	0.5
197	AHSG	ENSP00000393887	2.74914	0.000271548	0.363751	0.0952381	7	6	FALSE	60.1429	0	7	0	0.989831	0	2980	0.197912
34	ACADM	ENSP00000409612	2.83199	0.00255685	0.353108	0.0666667	6	5	FALSE	45	0	6	0	0.989349	0	11300	0.191092
1549	CYP2A7	ENSP00000301146	4.95742	0.0023015	0.201718	0	2	7	FALSE	1.5	0	2	0	0.976992	0	19442	0.5
36	ACADSB	ENSP00000357873	2.98504	3.94152e-05	0.335004	0	3	6	FALSE	57	0	3	0	0.988459	0	412	0.35
3034	HAL	ENSP00000261208	0	0	0	0	0	0	TRUE	0	0	0	0	Infinity	0	0	0
1191	CLU	ENSP00000315130	2.42002	0.00762425	0.413219	0.0850575	30	6	FALSE	36.3	0	30	0	0.991744	0	55032	0.0700838
328	APEX1	ENSP00000216714	2.3809	0.000831964	0.42001	0.346405	18	5	FALSE	78.1667	0	18	0	0.991972	0	15252	0.140588
7048	TGFBR2	ENSP00000351905	2.56962	0.00493506	0.389163	0.130435	24	5	FALSE	33.7917	0	24	0	0.990874	0	35204	0.0836435
84700	MYO18B	ENSP00000334563	3.34868	0	0.298625	0	1	6	FALSE	37	0	1	0	0.986345	0	0	0
2280	FKBP1A	ENSP00000371138	2.77215	0.0014775	0.360731	0.106061	12	6	FALSE	30.8333	0	12	0	0.989697	0	9086	0.111314
7046	TGFBR1	ENSP00000364133	2.82854	0.00116843	0.353539	0.141667	16	6	FALSE	27.75	0	16	0	0.989369	0	9904	0.111842
8074	FGF23	ENSP00000237837	3.44189	0	0.290538	1	2	7	FALSE	25	0	2	0	0.985803	0	0	0.609756
2286	FKBP2	ENSP00000310935	3.26007	3.02017e-05	0.306742	0	3	6	FALSE	21	0	3	0	0.98686	0	244	0.338983
1196	CLK2	ENSP00000354856	3.00806	0.000457805	0.332441	0.333333	6	6	FALSE	29.1667	0	6	0	0.988325	0	3004	0.201149
6387	CXCL12	ENSP00000379140	3.32336	0	0.3009	0	1	7	FALSE	68	0	1	0	0.986492	0	0	0
4647	MYO7A	ENSP00000386331	3.00806	3.64918e-06	0.332441	0.333333	3	6	FALSE	59.6667	0	3	0	0.988325	0	58	0.41784
54600	UGT1A9	ENSP00000346768	3.96893	0	0.251957	1	2	8	FALSE	4.5	0	2	0	0.982739	0	0	0.642857
640	BLK	ENSP00000259089	2.77675	7.94263e-05	0.360133	0.25	9	6	FALSE	56.1111	0	9	0	0.98967	0	1150	0.195122
262	AMD1	ENSP00000357880	3.19217	0.000130327	0.313266	0	4	6	FALSE	19.75	0	4	0	0.987255	0	798	0.253378
284541	CYP4A22	ENSP00000360958	1	0	1	0	1	1	FALSE	1	0	1	0	1	0	0	0
472	ATM	ENSP00000278616	2.41657	0.00408183	0.41381	0.170513	40	6	FALSE	40.225	0	40	0	0.991764	0	37278	0.0785714
4025	LPO	ENSP00000262290	0	0	0	0	0	0	TRUE	0	0	0	0	Infinity	0	0	0
25	ABL1	ENSP00000361423	2.34062	0.00699218	0.427237	0.134871	54	5	FALSE	39.537	0	54	0	0.992206	0	70536	0.0718519
4914	NTRK1	ENSP00000431418	2.09666	0.0815179	0.476948	0.054713	155	5	FALSE	25.929	0	155	0	0.993624	0	668248	0.0403931
3569	IL6	ENSP00000258743	1	0	1	0	1	1	FALSE	1	0	1	0	1	0	0	0
1551	CYP3A7	ENSP00000337450	4.80207	0	0.208243	0	1	8	FALSE	2	0	1	0	0.977895	0	0	0
632	BGLAP	ENSP00000357255	0	0	0	0	0	0	TRUE	0	0	0	0	Infinity	0	0	0
3802	KIR2DL1	ENSP00000336769	0	0	0	0	0	0	TRUE	0	0	0	0	Infinity	0	0	0
2242	FES	ENSP00000331504	2.67779	0.000124938	0.373442	0.333333	6	6	FALSE	79.6667	0	6	0	0.990245	0	1432	0.231778
6714	SRC	ENSP00000350941	2.1611	0.0224639	0.462726	0.133964	84	5	FALSE	38.9405	0	84	0	0.993249	0	197198	0.0584334
2048	EPHB2	ENSP00000363763	3.0794	6.271e-05	0.324738	0.333333	6	6	FALSE	36.1667	0	6	0	0.98791	0	486	0.243764
9748	SLK	ENSP00000358770	2.99885	1.15061e-06	0.333461	0	2	5	FALSE	106	0	2	0	0.988379	0	36	0.570652
728378	POTEF	ENSP00000350052	2.86881	0.000572748	0.348576	0.2	10	6	FALSE	31.8	0	10	0	0.989135	0	4116	0.133898
7157	TP53	ENSP00000269305	2.06099	0.0818938	0.485204	0.0798314	172	6	FALSE	30.436	0	172	0	0.993831	0	641962	0.0460793
9682	KDM4A	ENSP00000361473	2.92865	0.000145193	0.341454	0.321429	8	6	FALSE	43.5	0	8	0	0.988787	0	1664	0.220663
445582	POTEE	ENSP00000439189	3.02992	6.10485e-06	0.330042	0.333333	3	6	FALSE	67.3333	0	3	0	0.988198	0	140	0.408537
7001	PRDX2	ENSP00000301522	2.49942	0.00385174	0.400092	0.143791	18	6	FALSE	53.5	0	18	0	0.991282	0	31140	0.113116
3283	HSD3B1	ENSP00000358421	4.56617	0	0.219002	0	1	8	FALSE	2	0	1	0	0.979266	0	0	0
1553	CYP2A13	ENSP00000332679	5.95627	0	0.16789	0	1	8	FALSE	2	0	1	0	0.971184	0	0	0
26090	ABHD12	ENSP00000365725	3.45685	1.05933e-05	0.289281	0	2	6	FALSE	18.5	0	2	0	0.985716	0	40	0.5
79831	KDM8	ENSP00000398410	3.30955	0	0.302156	0	1	6	FALSE	44	0	1	0	0.986572	0	0	0
4921	DDR2	ENSP00000356898	2.85155	1.15061e-06	0.350686	0.666667	3	5	FALSE	98.6667	0	3	0	0.989235	0	36	0.416315
999	CDH1	ENSP00000261769	2.34292	0.00922654	0.426817	0.102757	57	5	FALSE	34.5789	0	57	0	0.992192	0	82700	0.0632867
3757	KCNH2	ENSP00000262186	2.95742	0	0.338132	1	2	5	FALSE	103	0	2	0	0.98862	0	0	0.528205
2774	GNAL	ENSP00000334051	3.67319	0	0.272243	0	1	6	FALSE	12	0	1	0	0.984458	0	0	0
3952	LEP	ENSP00000312652	0	0	0	0	0	0	TRUE	0	0	0	0	Infinity	0	0	0
653781	POTEJ	ENSP00000387176	2.89068	1.6316e-05	0.345939	0.166667	4	6	FALSE	71.25	0	4	0	0.989008	0	290	0.313053
3479	IGF1	ENSP00000302665	3.26122	2.72976e-05	0.306634	0.333333	3	6	FALSE	22.3333	0	3	0	0.986853	0	210	0.4
10155	TRIM28	ENSP00000253024	2.28999	0.0109636	0.436683	0.170537	53	5	FALSE	46.6415	0	53	0	0.9925	0	99392	0.0789575
5286	PIK3C2A	ENSP00000265970	2.76295	0.000556806	0.361933	0.361111	9	5	FALSE	52.2222	0	9	0	0.98975	0	4616	0.182207
81608	FIP1L1	ENSP00000336752	2.6191	0.000323374	0.38181	0.321429	8	5	FALSE	76	0	8	0	0.990587	0	4496	0.196891
79799	UGT2A3	ENSP00000251566	1	0	1	0	1	1	FALSE	1	0	1	0	1	0	0	0
4296	MAP3K11	ENSP00000309597	2.63406	0.00244014	0.379642	0.222222	10	6	FALSE	64.3	0	10	0	0.9905	0	17460	0.166062
6723	SRM	ENSP00000366156	2.96778	7.76896e-05	0.336952	0	3	6	FALSE	77.6667	0	3	0	0.988559	0	880	0.397237
8824	CES2	ENSP00000317842	3.06559	0	0.326201	0	1	7	FALSE	162	0	1	0	0.987991	0	0	0
134	ADORA1	ENSP00000308549	2.98964	7.51508e-05	0.334488	0	2	6	FALSE	81.5	0	2	0	0.988432	0	764	0.506289
660	BMX	ENSP00000308774	2.61565	0.00012498	0.382314	0.511111	10	6	FALSE	72	0	10	0	0.990607	0	2502	0.181818
56949	XAB2	ENSP00000351137	2.8504	5.86501e-05	0.350828	0.166667	4	5	FALSE	87.75	0	4	0	0.989242	0	1078	0.342157
2558	GABRA5	ENSP00000335592	0	0	0	0	0	0	TRUE	0	0	0	0	Infinity	0	0	0
1815	DRD4	ENSP00000176183	0	0	0	0	0	0	TRUE	0	0	0	0	Infinity	0	0	0
2919	CXCL1	ENSP00000379110	3.06559	0	0.326201	1	2	7	FALSE	78.5	0	2	0	0.987991	0	0	0.556738
6347	CCL2	ENSP00000225831	3.35788	0	0.297807	0	1	6	FALSE	49	0	1	0	0.986291	0	0	0
4036	LRP2	ENSP00000263816	2.94591	0.00162362	0.339453	0.0555556	9	7	FALSE	27.6667	0	9	0	0.988687	0	10178	0.130435
2066	ERBB4	ENSP00000342235	2.57307	0.0005371	0.38864	0.308824	17	6	FALSE	56.7059	0	17	0	0.990854	0	6824	0.13566
4311	MME	ENSP00000353679	2.63751	0.00212442	0.379145	0.153846	14	6	FALSE	45.3571	0	14	0	0.99048	0	16638	0.124507
8694	DGAT1	ENSP00000332258	3.04833	0	0.328048	1	3	6	FALSE	54	0	3	0	0.988091	0	0	0.352941
10082	GPC6	ENSP00000366246	2.90564	0.000198467	0.344158	0.166667	4	6	FALSE	59.75	0	4	0	0.988921	0	1244	0.283493
4883	NPR3	ENSP00000265074	0	0	0	0	0	0	TRUE	0	0	0	0	Infinity	0	0	0
1020	CDK5	ENSP00000419782	2.48907	0.00196814	0.401757	0.21645	22	5	FALSE	48.8182	0	22	0	0.991343	0	20068	0.103993
3558	IL2	ENSP00000226730	0	0	0	0	0	0	TRUE	0	0	0	0	Infinity	0	0	0
4882	NPR2	ENSP00000341083	0	0	0	0	0	0	TRUE	0	0	0	0	Infinity	0	0	0
4792	NFKBIA	ENSP00000216797	2.47526	0.00190934	0.403998	0.215686	34	5	FALSE	45.2059	0	34	0	0.991423	0	22472	0.0973631
7297	TYK2	ENSP00000264818	2.81128	0.000468434	0.35571	0.153846	14	6	FALSE	31.8571	0	14	0	0.989469	0	4640	0.132397
1030	CDKN2B	ENSP00000276925	2.53855	0.000385063	0.393926	0.673684	20	6	FALSE	55.35	0	20	0	0.991055	0	7174	0.125226
125	ADH1B	ENSP00000306606	3.26352	0	0.306417	0	1	6	FALSE	60	0	1	0	0.98684	0	0	0
5253	PHF2	ENSP00000352185	3.04948	2.428e-05	0.327925	0	2	6	FALSE	87	0	2	0	0.988084	0	558	0.540881
317749	DHRS4L2	ENSP00000334801	3.79517	0	0.263493	0	1	7	FALSE	5	0	1	0	0.983749	0	0	0
7494	XBP1	ENSP00000216037	3.02186	9.54964e-05	0.330922	0.1	5	6	FALSE	36	0	5	0	0.988245	0	846	0.239189
150094	SIK1	ENSP00000270162	3.04603	1.19863e-05	0.328296	0.5	5	6	FALSE	31.8	0	5	0	0.988104	0	152	0.244615
57644	MYH7B	ENSP00000262873	3.03797	4.62144e-05	0.329167	0	4	6	FALSE	42.5	0	4	0	0.988151	0	410	0.282313
84446	BRSK1	ENSP00000310649	3.3084	2.65851e-06	0.302261	0	2	6	FALSE	26.5	0	2	0	0.986579	0	32	0.520408
4318	MMP9	ENSP00000361405	3.05524	0.0028968	0.327307	0.0952381	7	6	FALSE	21.5714	0	7	0	0.988051	0	20880	0.179487
6374	CXCL5	ENSP00000296027	4.05409	0	0.246665	0	1	7	FALSE	7	0	1	0	0.982244	0	0	0
81926	ABHD17A	ENSP00000250974	3.56387	0.00230734	0.280594	0	3	7	FALSE	8	0	3	0	0.985094	0	16916	0.333333
80270	HSD3B7	ENSP00000297679	4.01496	0	0.249069	0	1	7	FALSE	8	0	1	0	0.982471	0	0	0
348	APOE	ENSP00000252486	2.88377	0.00420464	0.346768	0.030303	12	6	FALSE	22	0	12	0	0.989048	0	29784	0.111693
7804	LRP8	ENSP00000303634	2.9275	0.000720056	0.341588	0.133333	6	6	FALSE	36.6667	0	6	0	0.988794	0	6404	0.19224
8630	HSD17B6	ENSP00000318631	0	0	0	0	0	0	TRUE	0	0	0	0	Infinity	0	0	0
5428	POLG	ENSP00000268124	0	0	0	0	0	0	TRUE	0	0	0	0	Infinity	0	0	0
1978	EIF4EBP1	ENSP00000340691	2.74914	0.000480909	0.363751	0.269231	13	6	FALSE	43.6923	0	13	0	0.989831	0	4386	0.149881
7299	TYR	ENSP00000263321	0	0	0	0	0	0	TRUE	0	0	0	0	Infinity	0	0	0
23382		ENSP00000315931	3.11047	0.00234421	0.321495	0.0666667	6	6	FALSE	19	0	6	0	0.98773	0	13654	0.185185
5605	MAP2K2	ENSP00000262948	2.73418	0.000149441	0.365741	0.309091	11	6	FALSE	51.1818	0	11	0	0.989918	0	2294	0.163753
5478	PPIA	ENSP00000419425	2.44189	0.00120901	0.409519	0.161905	21	5	FALSE	59.9048	0	21	0	0.991617	0	18974	0.118435
23683	PRKD3	ENSP00000234179	3.44074	0	0.290635	0	1	7	FALSE	49	0	1	0	0.98581	0	0	0
3359	HTR3A	ENSP00000347754	2.9977	0.0023015	0.333589	0	2	6	FALSE	78.5	0	2	0	0.988385	0	10586	0.5
2555	GABRA2	ENSP00000348897	0	0	0	0	0	0	TRUE	0	0	0	0	Infinity	0	0	0
2560	GABRB1	ENSP00000295454	0	0	0	0	0	0	TRUE	0	0	0	0	Infinity	0	0	0
4312	MMP1	ENSP00000322788	3.26697	0	0.306094	0	1	6	FALSE	69	0	1	0	0.98682	0	0	0
2903	GRIN2A	ENSP00000332549	2.91254	9.14331e-05	0.343343	0.4	5	6	FALSE	57.2	0	5	0	0.988881	0	1226	0.284577
8202	NCOA3	ENSP00000361066	2.41082	0.00463587	0.414797	0.17439	41	6	FALSE	43.8293	0	41	0	0.991798	0	52474	0.0855564
5159	PDGFRB	ENSP00000261799	2.57652	0.00338855	0.38812	0.278986	24	5	FALSE	45.3333	0	24	0	0.990834	0	28216	0.111179
5150	PDE7A	ENSP00000385632	4.14154	0	0.241456	0	1	7	FALSE	8	0	1	0	0.981735	0	0	0
4835	NQO2	ENSP00000337773	3.76295	0	0.265749	0	1	7	FALSE	10	0	1	0	0.983936	0	0	0
2580	GAK	ENSP00000314499	2.53395	0.00159991	0.394641	0.2	15	5	FALSE	49	0	15	0	0.991082	0	12488	0.111568
598	BCL2L1	ENSP00000302564	2.48907	0.00410137	0.401757	0.135897	40	6	FALSE	35.75	0	40	0	0.991343	0	37148	0.0789823
51780	KDM3B	ENSP00000326563	2.75604	0.000473559	0.362839	0.190476	7	5	FALSE	66.7143	0	7	0	0.98979	0	4280	0.226231
8608	RDH16	ENSP00000381206	0	0	0	0	0	0	TRUE	0	0	0	0	Infinity	0	0	0
664	BNIP3	ENSP00000357625	2.70426	0.000301747	0.369787	0.111111	9	6	FALSE	54.6667	0	9	0	0.990092	0	3798	0.166838
3654	IRAK1	ENSP00000358997	2.52474	0.00304795	0.39608	0.14532	29	5	FALSE	38.2069	0	29	0	0.991135	0	26010	0.087796
345	APOC3	ENSP00000227667	3.55581	0	0.28123	1	2	7	FALSE	17.5	0	2	0	0.985141	0	0	0.648148
581	BAX	ENSP00000293288	2.60759	0.00125719	0.383495	0.219048	21	6	FALSE	39.1429	0	21	0	0.990654	0	12736	0.100244
84864	RIOX2	ENSP00000328251	3.06559	0	0.326201	0	1	7	FALSE	162	0	1	0	0.987991	0	0	0
3805	KIR2DL4	ENSP00000339634	0	0	0	0	0	0	TRUE	0	0	0	0	Infinity	0	0	0
8772	FADD	ENSP00000301838	2.81243	0.00388925	0.355565	0.2	21	6	FALSE	23.619	0	21	0	0.989463	0	31314	0.0948525
1453	CSNK1D	ENSP00000324464	2.54891	0.000813706	0.392325	0.238095	15	6	FALSE	54.9333	0	15	0	0.990995	0	8910	0.125133
2287	FKBP3	ENSP00000216330	2.73188	1.95653e-05	0.366049	0.5	5	5	FALSE	107.6	0	5	0	0.989931	0	946	0.328049
4615	MYD88	ENSP00000401399	2.9229	0.000554113	0.342126	0.2	11	6	FALSE	24.5455	0	11	0	0.98882	0	4582	0.136874
6422	SFRP1	ENSP00000220772	0	0	0	0	0	0	TRUE	0	0	0	0	Infinity	0	0	0
196	AHR	ENSP00000242057	2.80092	1.89543e-05	0.357025	0.5	8	6	FALSE	69.5	0	8	0	0.98953	0	394	0.255055
5829	PXN	ENSP00000228307	2.53049	0.0020388	0.39518	0.2	26	6	FALSE	44.6538	0	26	0	0.991102	0	19264	0.101399
4145	MATK	ENSP00000378485	2.63751	0.000142969	0.379145	0.472727	11	5	FALSE	69.1818	0	11	0	0.99048	0	2474	0.182538
653269	POTEI	ENSP00000392718	3.24856	7.25213e-05	0.307829	0.1	5	6	FALSE	19	0	5	0	0.986927	0	424	0.245333
10768		ENSP00000358814	2.86306	0.00117265	0.349277	0.0545455	11	6	FALSE	26.0909	0	11	0	0.989168	0	6920	0.117181
5144	PDE4D	ENSP00000345502	2.62831	0.00156024	0.380473	0.151515	12	6	FALSE	57.75	0	12	0	0.990533	0	11934	0.14974
1583	CYP11A1	ENSP00000268053	3.24741	0	0.307938	1	3	7	FALSE	38	0	3	0	0.986934	0	0	0.469136
3172	HNF4A	ENSP00000312987	2.65938	0.000364997	0.376028	0.380117	19	6	FALSE	52.3684	0	19	0	0.990352	0	4984	0.145873
4780	NFE2L2	ENSP00000380252	2.71001	0.000563995	0.369002	0.20915	18	6	FALSE	43.6667	0	18	0	0.990058	0	5468	0.136967
183	AGT	ENSP00000355627	3.00921	0.00287301	0.332314	0	4	7	FALSE	48	0	4	0	0.988319	0	19658	0.26257
3718	JAK3	ENSP00000391676	2.83314	0.000412214	0.352965	0.180952	15	6	FALSE	29.8	0	15	0	0.989342	0	4010	0.124859
7366	UGT2B15	ENSP00000341045	1	0	1	0	1	1	FALSE	1	0	1	0	1	0	0	0
8856	NR1I2	ENSP00000336528	2.8435	0.000425777	0.351679	0.141026	13	6	FALSE	33	0	13	0	0.989282	0	4924	0.135334
56937	PMEPA1	ENSP00000345826	3.40391	0	0.29378	0	1	7	FALSE	52	0	1	0	0.986024	0	0	0
1984	EIF5A	ENSP00000336702	2.67664	0.000990232	0.373603	0.205128	13	6	FALSE	51	0	13	0	0.990252	0	7626	0.147585
2335	FN1	ENSP00000346839	2.32451	0.0246137	0.430198	0.0676032	68	6	FALSE	28.5294	0	68	0	0.992299	0	209250	0.0520362
6097	RORC	ENSP00000327025	2.75719	0.00240566	0.362688	0.285714	8	6	FALSE	53.75	0	8	0	0.989784	0	12972	0.184914
196743	PAOX	ENSP00000278060	0	0	0	0	0	0	TRUE	0	0	0	0	Infinity	0	0	0
3576	CXCL8	ENSP00000306512	3.18182	0	0.314286	1	2	6	FALSE	48	0	2	0	0.987315	0	0	0.521739
570	BAAT	ENSP00000259407	0	0	0	0	0	0	TRUE	0	0	0	0	Infinity	0	0	0
122970	ACOT4	ENSP00000323071	0	0	0	0	0	0	TRUE	0	0	0	0	Infinity	0	0	0
6580	SLC22A1	ENSP00000355930	0	0	0	0	0	0	TRUE	0	0	0	0	Infinity	0	0	0
51104	ABHD17B	ENSP00000366240	0	0	0	0	0	0	TRUE	0	0	0	0	Infinity	0	0	0
4056	LTC4S	ENSP00000292596	3.85961	0	0.259094	0	1	7	FALSE	7	0	1	0	0.983374	0	0	0
840	CASP7	ENSP00000358327	2.78481	0.000544228	0.359091	0.25	17	6	FALSE	32	0	17	0	0.989623	0	6348	0.118301
2876	GPX1	ENSP00000407375	3.25432	4.18025e-06	0.307284	0.333333	3	6	FALSE	27.3333	0	3	0	0.986894	0	40	0.409091
7276	TTR	ENSP00000237014	3.10472	0.00486451	0.32209	0.0555556	9	6	FALSE	14.2222	0	9	0	0.987763	0	35048	0.141204
10950	BTG3	ENSP00000344609	3.55696	0	0.281139	0	1	7	FALSE	15	0	1	0	0.985134	0	0	0
5824	PEX19	ENSP00000357051	2.81243	0.00368092	0.355565	0.0384615	13	6	FALSE	25.5385	0	13	0	0.989463	0	23972	0.100903
1938	EEF2	ENSP00000307940	2.41082	0.00538761	0.414797	0.135897	40	5	FALSE	41.8	0	40	0	0.991798	0	51862	0.0813353
6017	RLBP1	ENSP00000268125	3.06329	0.0023015	0.326446	0	2	7	FALSE	81.5	0	2	0	0.988004	0	14270	0.5
5959	RDH5	ENSP00000257895	4.06214	0	0.246176	0	1	8	FALSE	2	0	1	0	0.982197	0	0	0
2564	GABRE	ENSP00000359353	3.95627	4.80424e-05	0.252763	0	2	8	FALSE	3	0	2	0	0.982812	0	274	0.5
1432	MAPK14	ENSP00000229794	2.38665	0.0105759	0.418997	0.158367	50	6	FALSE	42.34	0	50	0	0.991938	0	89496	0.0800379
9564		ENSP00000391669	2.71116	0.000327474	0.368846	0.272059	17	6	FALSE	44.8824	0	17	0	0.990051	0	4604	0.135419
1195		ENSP00000394734	2.88032	0.00717328	0.347183	0.0909091	12	6	FALSE	25.0833	0	12	0	0.989068	0	48848	0.120915
653857	ACTR3C	ENSP00000252071	0	0	0	0	0	0	TRUE	0	0	0	0	Infinity	0	0	0
4915	NTRK2	ENSP00000277120	2.86076	2.13512e-05	0.349558	0.52381	7	6	FALSE	57.5714	0	7	0	0.989182	0	346	0.241897
4916	NTRK3	ENSP00000354207	2.65132	0.000167471	0.37717	0.285714	8	5	FALSE	70.5	0	8	0	0.990399	0	4098	0.190541
216	ALDH1A1	ENSP00000297785	3.28769	4.26659e-06	0.304165	0	2	6	FALSE	39.5	0	2	0	0.986699	0	94	0.557971
4294	MAP3K10	ENSP00000253055	3.03222	2.54794e-05	0.329791	0.2	5	6	FALSE	36.8	0	5	0	0.988185	0	268	0.254167
246	ALOX15	ENSP00000293761	3.24281	0	0.308375	0	1	6	FALSE	63	0	1	0	0.98696	0	0	0
9451	EIF2AK3	ENSP00000307235	3.04718	3.68878e-06	0.328172	0.333333	3	6	FALSE	46.3333	0	3	0	0.988098	0	44	0.368
284	ANGPT1	ENSP00000428340	3.09551	0	0.323048	0	1	6	FALSE	142	0	1	0	0.987817	0	0	0
131890	GRK7	ENSP00000264952	0	0	0	0	0	0	TRUE	0	0	0	0	Infinity	0	0	0
285	ANGPT2	ENSP00000314897	3.04373	1.93689e-05	0.328544	0	4	6	FALSE	36.75	0	4	0	0.988118	0	242	0.281496
2047	EPHB1	ENSP00000381097	3.13464	4.79034e-05	0.319016	0	3	6	FALSE	47.3333	0	3	0	0.987589	0	342	0.373656
842	CASP9	ENSP00000330237	2.81358	0.000287385	0.355419	0.351648	14	6	FALSE	37.1429	0	14	0	0.989456	0	3182	0.139112
50488	MINK1	ENSP00000347427	2.9229	9.81958e-05	0.342126	0.333333	4	6	FALSE	61	0	4	0	0.98882	0	488	0.297794
7421	VDR	ENSP00000447173	2.59148	0.000923713	0.385879	0.304615	26	5	FALSE	46.4615	0	26	0	0.990747	0	14328	0.117327
578	BAK1	ENSP00000353878	2.86076	0.000120584	0.349558	0.388889	9	6	FALSE	37.3333	0	9	0	0.989182	0	1296	0.164208
5261	PHKG2	ENSP00000455607	2.82509	0.0023465	0.353971	0.142857	7	6	FALSE	51.2857	0	7	0	0.989389	0	12914	0.203429
6772	STAT1	ENSP00000354394	2.31991	0.0109562	0.431052	0.15083	52	5	FALSE	43.1731	0	52	0	0.992326	0	108338	0.0748234
100		ENSP00000361965	3.15535	0.000852357	0.316922	0.047619	7	7	FALSE	18.2857	0	7	0	0.987469	0	6416	0.1793
5260	PHKG1	ENSP00000297373	3.82394	0	0.261511	0	1	7	FALSE	7	0	1	0	0.983582	0	0	0
330	BIRC3	ENSP00000263464	2.7641	0.0021822	0.361782	0.158333	16	6	FALSE	31.875	0	16	0	0.989744	0	15754	0.109862
5743	PTGS2	ENSP00000356438	2.66053	0.000484734	0.375865	0.4	6	6	FALSE	88	0	6	0	0.990346	0	3618	0.245125
2937	GSS	ENSP00000216951	3.29919	0	0.303104	0	1	6	FALSE	69	0	1	0	0.986633	0	0	0
50814	NSDHL	ENSP00000359297	3.86651	5.61385e-06	0.258631	0	2	7	FALSE	6.5	0	2	0	0.983334	0	20	0.5
3937	LCP2	ENSP00000046794	2.68354	0.000294881	0.372642	0.444444	10	6	FALSE	56.5	0	10	0	0.990212	0	3524	0.163768
5871	MAP4K2	ENSP00000294066	3.63291	0	0.275261	0	1	7	FALSE	10	0	1	0	0.984692	0	0	0
1027	CDKN1B	ENSP00000228872	2.66628	0.000698411	0.375054	0.263333	25	6	FALSE	39.72	0	25	0	0.990312	0	8164	0.113908
6819	SULT1C2	ENSP00000319622	3.7687	0	0.265344	1	2	7	FALSE	4.5	0	2	0	0.983903	0	0	0.75
3934	LCN2	ENSP00000277480	3.06904	0.000229779	0.325834	0	3	6	FALSE	52	0	3	0	0.987971	0	1480	0.342282
92304	SCGB3A1	ENSP00000292641	3.22209	3.57398e-06	0.310357	0	2	6	FALSE	39	0	2	0	0.987081	0	60	0.535211
4504	MT3	ENSP00000200691	4.10357	0	0.24369	0	1	7	FALSE	9	0	1	0	0.981956	0	0	0
4646	MYO6	ENSP00000358994	2.47756	0.00283547	0.403623	0.224615	26	5	FALSE	48.9615	0	26	0	0.99141	0	31448	0.102645
3627	CXCL10	ENSP00000305651	0	0	0	0	0	0	TRUE	0	0	0	0	Infinity	0	0	0
2208	FCER2	ENSP00000264072	0	0	0	0	0	0	TRUE	0	0	0	0	Infinity	0	0	0
6096	RORB	ENSP00000366093	3.75604	0	0.266238	0	1	7	FALSE	8	0	1	0	0.983977	0	0	0
2081	ERN1	ENSP00000401445	2.91254	4.73161e-05	0.343343	0	3	6	FALSE	77.3333	0	3	0	0.988881	0	756	0.37055
6009	RHEB	ENSP00000262187	2.91715	0.000302319	0.342801	0.0727273	11	6	FALSE	26.4545	0	11	0	0.988854	0	2530	0.146379
3029	HAGH	ENSP00000380514	2.81588	0.00113809	0.355129	0.133333	6	6	FALSE	50.8333	0	6	0	0.989443	0	7094	0.201195
80853	KDM7A	ENSP00000380692	4.00921	0	0.249426	0	1	7	FALSE	9	0	1	0	0.982505	0	0	0
23049	SMG1	ENSP00000402515	2.92865	0.000118552	0.341454	0	4	6	FALSE	52.25	0	4	0	0.988787	0	1060	0.275538
221656	KDM1B	ENSP00000297792	2.97814	2.66851e-05	0.335781	0.666667	4	6	FALSE	53.75	0	4	0	0.988499	0	582	0.296961
6721	SREBF2	ENSP00000354476	2.85961	0.000193587	0.349698	0.309091	11	6	FALSE	42.3636	0	11	0	0.989188	0	2196	0.173249
572	BAD	ENSP00000309103	2.82048	0.000282254	0.354549	0.191667	16	6	FALSE	31.3125	0	16	0	0.989416	0	2888	0.122304
30814	PLA2G2E	ENSP00000364257	0	0	0	0	0	0	TRUE	0	0	0	0	Infinity	0	0	0
8900	CCNA1	ENSP00000255465	2.73418	6.93063e-05	0.365741	0.487179	13	6	FALSE	52.3846	0	13	0	0.989918	0	1204	0.170634
890	CCNA2	ENSP00000274026	2.66168	0.000521144	0.375703	0.37619	21	6	FALSE	47.3333	0	21	0	0.990339	0	6196	0.133575
6195	RPS6KA1	ENSP00000435412	2.50978	0.00190865	0.398441	0.150769	26	5	FALSE	39.6538	0	26	0	0.991222	0	19096	0.0875596
140	ADORA3	ENSP00000358730	0	0	0	0	0	0	TRUE	0	0	0	0	Infinity	0	0	0
6196	RPS6KA2	ENSP00000427015	2.7641	0.00263471	0.361782	0.311111	10	6	FALSE	49.3	0	10	0	0.989744	0	16456	0.163667
2475	MTOR	ENSP00000354558	2.4672	0.00360476	0.405317	0.154655	37	5	FALSE	40.4324	0	37	0	0.99147	0	35532	0.085064
218	ALDH3A1	ENSP00000225740	0	0	0	0	0	0	TRUE	0	0	0	0	Infinity	0	0	0
412	STS	ENSP00000217961	0	0	0	0	0	0	TRUE	0	0	0	0	Infinity	0	0	0
5328	PLAU	ENSP00000361850	3.39586	0.000120718	0.294476	0.1	5	7	FALSE	11.8	0	5	0	0.986071	0	668	0.228571
5054	SERPINE1	ENSP00000223095	3.12773	0.000361618	0.31972	0.2	6	6	FALSE	17.1667	0	6	0	0.987629	0	2582	0.193487
10901	DHRS4	ENSP00000326219	2.79632	0.00462517	0.357613	0	5	6	FALSE	66.6	0	5	0	0.989556	0	22242	0.238545
57396	CLK4	ENSP00000316948	4.10932	0	0.243349	0	1	7	FALSE	6	0	1	0	0.981923	0	0	0
8854	ALDH1A2	ENSP00000249750	0	0	0	0	0	0	TRUE	0	0	0	0	Infinity	0	0	0
6382	SDC1	ENSP00000254351	2.62371	0.00222613	0.38114	0.128205	13	6	FALSE	44.3846	0	13	0	0.99056	0	13048	0.114189
27284	SULT1B1	ENSP00000308770	0	0	0	0	0	0	TRUE	0	0	0	0	Infinity	0	0	0
6383	SDC2	ENSP00000307046	2.93556	0.00372054	0.340651	0.0909091	12	6	FALSE	17.6667	0	12	0	0.988747	0	22206	0.108333
4629	MYH11	ENSP00000379616	2.95627	7.96403e-05	0.338264	0.178571	8	6	FALSE	32.125	0	8	0	0.988626	0	948	0.178771
6385	SDC4	ENSP00000361818	3.3809	0	0.295779	0	1	7	FALSE	49	0	1	0	0.986158	0	0	0
2100	ESR2	ENSP00000343925	2.09666	0.0781033	0.476948	0.049046	142	5	FALSE	24.3803	0	142	0	0.993624	0	559614	0.0377154
337	APOA4	ENSP00000350425	3.67204	0	0.272328	0	1	7	FALSE	21	0	1	0	0.984465	0	0	0
8288	EPX	ENSP00000225371	0	0	0	0	0	0	TRUE	0	0	0	0	Infinity	0	0	0
5468	PPARG	ENSP00000287820	2.36364	0.00560351	0.423077	0.253846	40	5	FALSE	49.575	0	40	0	0.992072	0	60514	0.0914668
2045	EPHA7	ENSP00000358309	3.60414	0.0023254	0.277458	0	4	6	FALSE	5.25	0	4	0	0.98486	0	16438	0.303571
130399	ACVR1C	ENSP00000243349	0	0	0	0	0	0	TRUE	0	0	0	0	Infinity	0	0	0
637	BID	ENSP00000318822	2.87917	0.000540012	0.347322	0.338235	17	6	FALSE	25.5882	0	17	0	0.989075	0	4478	0.120699
1555	CYP2B6	ENSP00000324648	3.79517	0	0.263493	0	1	7	FALSE	5	0	1	0	0.983749	0	0	0
7022	TFAP2C	ENSP00000201031	2.94246	6.23411e-05	0.339851	0.333333	6	7	FALSE	47	0	6	0	0.988707	0	708	0.213851
3292	HSD17B1	ENSP00000466799	3.3809	0	0.295779	0	1	7	FALSE	49	0	1	0	0.986158	0	0	0
6794	STK11	ENSP00000324856	2.40046	0.00456126	0.416587	0.217054	43	6	FALSE	39.2326	0	43	0	0.991858	0	41674	0.0748269
5241	PGR	ENSP00000325120	2.65017	0.00042944	0.377334	0.308824	17	6	FALSE	53.1765	0	17	0	0.990406	0	6268	0.14633
1580	CYP4B1	ENSP00000360991	4.12428	0	0.242467	0	1	7	FALSE	4	0	1	0	0.981836	0	0	0
54577	UGT1A7	ENSP00000362525	3.96893	0	0.251957	1	2	8	FALSE	4.5	0	2	0	0.982739	0	0	0.642857
4638	MYLK	ENSP00000353452	2.75374	2.00886e-05	0.363142	0.3	5	6	FALSE	80.6	0	5	0	0.989804	0	394	0.272542
142	PARP1	ENSP00000355759	2.27503	0.0048534	0.439555	0.23367	55	5	FALSE	51.3818	0	55	0	0.992587	0	63538	0.0852103
54498	SMOX	ENSP00000307252	4.27503	0	0.233917	0	1	8	FALSE	2	0	1	0	0.980959	0	0	0
167127	UGT3A2	ENSP00000282507	3.99655	0	0.250216	0	1	7	FALSE	2	0	1	0	0.982578	0	0	0
3725	JUN	ENSP00000360266	2.35673	0.0080361	0.424316	0.2099	57	5	FALSE	41.7719	0	57	0	0.992112	0	80268	0.0784197
7039	TGFA	ENSP00000295400	2.93096	0	0.341186	1	2	6	FALSE	119.5	0	2	0	0.988774	0	0	0.615979
83942	TSSK1B	ENSP00000375081	3.50518	0	0.285292	0	1	6	FALSE	23	0	1	0	0.985435	0	0	0
5313	PKLR	ENSP00000339933	3.12543	0.00230888	0.319956	0	4	6	FALSE	25.25	0	4	0	0.987643	0	13046	0.272472
415116		ENSP00000353824	0	0	0	0	0	0	TRUE	0	0	0	0	Infinity	0	0	0
4293	MAP3K9	ENSP00000451263	0	0	0	0	0	0	TRUE	0	0	0	0	Infinity	0	0	0
10018	BCL2L11	ENSP00000376943	2.74338	0.000165246	0.364513	0.309091	11	6	FALSE	49.6364	0	11	0	0.989864	0	1920	0.157576
1437	CSF2	ENSP00000296871	3.93441	0	0.254168	0	1	7	FALSE	12	0	1	0	0.982939	0	0	0
151056	PLB1	ENSP00000330442	4.09206	0	0.244376	0	1	7	FALSE	2	0	1	0	0.982023	0	0	0
135	ADORA2A	ENSP00000336630	3.7687	9.92509e-06	0.265344	0	2	6	FALSE	7	0	2	0	0.983903	0	88	0.5
3567	IL5	ENSP00000231454	0	0	0	0	0	0	TRUE	0	0	0	0	Infinity	0	0	0
5753	PTK6	ENSP00000217185	2.64672	0.000149196	0.377826	0.380952	7	6	FALSE	84.4286	0	7	0	0.990426	0	3372	0.226575
2064	ERBB2	ENSP00000269571	2.3038	0.0234225	0.434066	0.122539	83	5	FALSE	30.8916	0	83	0	0.99242	0	196046	0.0552749
2065	ERBB3	ENSP00000267101	2.51438	0.0055521	0.397712	0.142029	46	6	FALSE	30.913	0	46	0	0.991195	0	47622	0.0702684
6198	RPS6KB1	ENSP00000225577	2.49137	0.00346576	0.401386	0.189723	23	5	FALSE	47	0	23	0	0.991329	0	27544	0.0991819
5979	RET	ENSP00000347942	2.62831	3.77404e-05	0.380473	0.644444	10	5	FALSE	84.6	0	10	0	0.990533	0	832	0.220312
2044	EPHA5	ENSP00000273854	3.13003	0	0.319485	1	2	6	FALSE	76	0	2	0	0.987616	0	0	0.59375
6197	RPS6KA3	ENSP00000368884	2.50403	0.00139772	0.399357	0.251462	19	5	FALSE	58.7895	0	19	0	0.991256	0	15760	0.126861
23133	PHF8	ENSP00000350676	2.73418	0.000330314	0.365741	0.0952381	7	6	FALSE	60.5714	0	7	0	0.989918	0	3538	0.182371
2152	F3	ENSP00000334145	3.88723	0	0.257253	0	1	8	FALSE	4	0	1	0	0.983214	0	0	0
3065	HDAC1	ENSP00000362649	2.21634	0.018577	0.451194	0.15098	85	5	FALSE	38.3882	0	85	0	0.992928	0	164914	0.0623816
9759	HDAC4	ENSP00000264606	2.36018	0.00506198	0.423696	0.182148	53	5	FALSE	43.0189	0	53	0	0.992092	0	55572	0.0795173
10014	HDAC5	ENSP00000225983	2.44189	0.00743703	0.409519	0.140306	49	6	FALSE	38.1429	0	49	0	0.991617	0	76230	0.0797891
121504	HIST4H4	ENSP00000350767	2.9229	0.000199864	0.342126	0.138889	9	6	FALSE	36	0	9	0	0.98882	0	2340	0.174526
10013	HDAC6	ENSP00000334061	2.25547	0.00949831	0.443367	0.142077	61	5	FALSE	44.1475	0	61	0	0.992701	0	99068	0.0719653
5320	PLA2G2A	ENSP00000364252	2.87572	0.000214383	0.347739	0.3	5	6	FALSE	62.6	0	5	0	0.989095	0	1688	0.287963
57521	RPTOR	ENSP00000307272	2.49137	0.00420202	0.401386	0.142857	35	5	FALSE	36.4	0	35	0	0.991329	0	37846	0.078726
847	CAT	ENSP00000241052	2.55006	0.00239405	0.392148	0.0955882	17	5	FALSE	43.1765	0	17	0	0.990988	0	17828	0.101138
85366	MYLK2	ENSP00000365152	2.87687	6.16334e-05	0.3476	0.166667	4	6	FALSE	73.75	0	4	0	0.989088	0	1064	0.314378
93973	ACTR8	ENSP00000336842	3.04603	0	0.328296	1	2	6	FALSE	76.5	0	2	0	0.988104	0	0	0.520408
5528	PPP2R5D	ENSP00000417963	2.78596	0.00067456	0.358943	0.138889	9	5	FALSE	39.4444	0	9	0	0.989617	0	4360	0.144444
2043	EPHA4	ENSP00000281821	2.79862	0.00385581	0.357319	0.244444	10	5	FALSE	43.4	0	10	0	0.989543	0	26520	0.15448
641372	ACOT6	ENSP00000370531	0	0	0	0	0	0	TRUE	0	0	0	0	Infinity	0	0	0
284656	EPHA10	ENSP00000362139	4.60299	0	0.21725	0	1	7	FALSE	4	0	1	0	0.979052	0	0	0
1080	CFTR	ENSP00000003084	2.32911	0.0252782	0.429348	0.0688129	71	6	FALSE	28.2958	0	71	0	0.992273	0	210224	0.0523776
4869	NPM1	ENSP00000296930	2.17491	0.0148146	0.459788	0.182723	67	5	FALSE	48.3134	0	67	0	0.993169	0	149638	0.0723892
3232	HOXD3	ENSP00000249440	0	0	0	0	0	0	TRUE	0	0	0	0	Infinity	0	0	0
190	NR0B1	ENSP00000368253	3.12773	8.42195e-05	0.31972	0.0833333	9	6	FALSE	21.3333	0	9	0	0.987629	0	880	0.194444
200186		ENSP00000357622	2.90334	3.01428e-05	0.344431	0.333333	4	6	FALSE	68	0	4	0	0.988934	0	442	0.311927
4215	MAP3K3	ENSP00000354927	2.80552	5.9604e-05	0.35644	0.285714	8	6	FALSE	48.375	0	8	0	0.989503	0	788	0.186531
23235	SIK2	ENSP00000305976	2.72727	0.0004047	0.366667	0.25	9	6	FALSE	50.1111	0	9	0	0.989958	0	3510	0.160414
5607	MAP2K5	ENSP00000178640	2.65247	0.000303726	0.377007	0.608187	19	6	FALSE	47.8947	0	19	0	0.990393	0	3764	0.132161
1311	COMP	ENSP00000222271	0	0	0	0	0	0	TRUE	0	0	0	0	Infinity	0	0	0
1981	EIF4G1	ENSP00000338020	2.65132	0.000297175	0.37717	0.244444	10	5	FALSE	68.9	0	10	0	0.990399	0	4330	0.191111
5916	RARG	ENSP00000377947	3.1542	0.000512874	0.317038	0.25	9	6	FALSE	23.2222	0	9	0	0.987476	0	4708	0.195632
112	ADCY6	ENSP00000311405	3.22555	6.07791e-06	0.310025	0	2	6	FALSE	33.5	0	2	0	0.987061	0	76	0.550847
498	ATP5A1	ENSP00000282050	2.3061	0.00299191	0.433633	0.237517	39	5	FALSE	53.2308	0	39	0	0.992406	0	46708	0.090069
8626	TP63	ENSP00000264731	2.67664	0.000301289	0.373603	0.294118	18	6	FALSE	46.5	0	18	0	0.990252	0	3716	0.135965
1543	CYP1A1	ENSP00000369050	3.02186	0.00136968	0.330922	0.0952381	7	6	FALSE	22	0	7	0	0.988245	0	9248	0.172571
9971	NR1H4	ENSP00000447149	2.84925	0.00027592	0.350969	0.2	10	6	FALSE	45.7	0	10	0	0.989249	0	4008	0.186831
9475	ROCK2	ENSP00000317985	2.98274	0	0.335262	1	2	5	FALSE	108	0	2	0	0.988472	0	0	0.5625
64005	MYO1G	ENSP00000258787	3.32796	0	0.300484	0	1	7	FALSE	71	0	1	0	0.986465	0	0	0
2041	EPHA1	ENSP00000275815	2.95052	0.000315726	0.338924	0.047619	7	6	FALSE	29.2857	0	7	0	0.98866	0	2226	0.163265
55860	ACTR10	ENSP00000254286	3.18987	1.20913e-05	0.313492	0.6	5	6	FALSE	20.6	0	5	0	0.987268	0	122	0.274667
137902	PXDNL	ENSP00000348645	3.43383	0	0.29122	0	1	6	FALSE	35	0	1	0	0.98585	0	0	0
5602	MAPK10	ENSP00000352157	2.6214	0.000489733	0.381475	0.25641	13	6	FALSE	54.8462	0	13	0	0.990573	0	5906	0.1428
10120	ACTR1B	ENSP00000289228	2.89873	0.000414007	0.344978	0.5	5	6	FALSE	48.8	0	5	0	0.988961	0	1694	0.222936
8841	HDAC3	ENSP00000302967	2.40391	0.00276758	0.415989	0.239394	45	5	FALSE	46.4889	0	45	0	0.991838	0	35662	0.0897469
2730	GCLM	ENSP00000359258	2.95397	0	0.338527	1	2	6	FALSE	94	0	2	0	0.98864	0	0	0.531073
57159	TRIM54	ENSP00000296098	2.97123	0.00233819	0.336561	0.0666667	6	6	FALSE	36	0	6	0	0.988539	0	14234	0.211577
7422	VEGFA	ENSP00000361125	2.7641	0.000738256	0.361782	0.181818	12	6	FALSE	40.5833	0	12	0	0.989744	0	6110	0.142899
7060	THBS4	ENSP00000339730	3.05063	0.0002526	0.327801	0	2	7	FALSE	85	0	2	0	0.988078	0	1088	0.502994
7153	TOP2A	ENSP00000411532	2.57077	0.00631146	0.388988	0.252632	20	6	FALSE	52.95	0	20	0	0.990868	0	53060	0.129218
2147	F2	ENSP00000308541	3.12773	0.00075974	0.31972	0.142857	7	7	FALSE	16.8571	0	7	0	0.987629	0	3322	0.165945
7099	TLR4	ENSP00000363089	2.89528	0.000196991	0.34539	0.355556	10	6	FALSE	34.1	0	10	0	0.988981	0	2140	0.164734
5562	PRKAA1	ENSP00000346148	2.54545	0.00418795	0.392857	0.111111	28	5	FALSE	33.3929	0	28	0	0.991015	0	29342	0.0784198
3074	HEXB	ENSP00000261416	3.50518	0	0.285292	0	1	6	FALSE	23	0	1	0	0.985435	0	0	0
6194	RPS6	ENSP00000369757	2.47641	0.00149396	0.40381	0.218462	26	5	FALSE	51.0385	0	26	0	0.991416	0	17936	0.108132
84271	POLDIP3	ENSP00000252115	2.7756	0.000989558	0.360282	0.133333	10	6	FALSE	38.1	0	10	0	0.989677	0	5786	0.138603
4170	MCL1	ENSP00000358022	2.58458	0.000638096	0.38691	0.189474	20	6	FALSE	45.85	0	20	0	0.990787	0	7834	0.111829
6199	RPS6KB2	ENSP00000308413	2.57307	0.00180315	0.38864	0.110769	26	6	FALSE	37.7308	0	26	0	0.990854	0	18272	0.0923266
260293	CYP4X1	ENSP00000360968	0	0	0	0	0	0	TRUE	0	0	0	0	Infinity	0	0	0
1548	CYP2A6	ENSP00000301141	3.96087	0.00459769	0.252469	0	2	6	FALSE	5	0	2	0	0.982786	0	38880	0.5
388611	CD164L2	ENSP00000363139	0	0	0	0	0	0	TRUE	0	0	0	0	Infinity	0	0	0
5327	PLAT	ENSP00000220809	3.19102	0.002289	0.313379	0.266667	6	7	FALSE	17	0	6	0	0.987261	0	15512	0.189139
1565	CYP2D6	ENSP00000353820	3.95742	0	0.25269	1	2	6	FALSE	6.5	0	2	0	0.982806	0	0	0.722222
3082	HGF	ENSP00000222390	2.78596	0.000415305	0.358943	0.628571	15	6	FALSE	37.8667	0	15	0	0.989617	0	3382	0.142893
332	BIRC5	ENSP00000301633	2.78136	0.000908923	0.359537	0.180952	15	6	FALSE	34.3333	0	15	0	0.989643	0	7476	0.12598
83939	EIF2A	ENSP00000417229	2.66283	0.000588115	0.37554	0.138889	9	5	FALSE	57.1111	0	9	0	0.990332	0	5882	0.159488
9212	AURKB	ENSP00000463999	2.5328	0.00235862	0.394821	0.155797	24	6	FALSE	40.25	0	24	0	0.991088	0	21978	0.0915907
285220	EPHA6	ENSP00000374323	0	0	0	0	0	0	TRUE	0	0	0	0	Infinity	0	0	0
270		ENSP00000430075	0	0	0	0	0	0	TRUE	0	0	0	0	Infinity	0	0	0
55589	BMP2K	ENSP00000334836	2.74914	0.000208676	0.363751	0.333333	9	6	FALSE	54.2222	0	9	0	0.989831	0	2722	0.181208
2912	GRM2	ENSP00000378492	3.27618	0	0.305234	0	1	6	FALSE	61	0	1	0	0.986766	0	0	0
10892	MALT1	ENSP00000319279	3.01841	0.000102011	0.3313	0.357143	8	6	FALSE	28	0	8	0	0.988265	0	812	0.197183
25800	SLC39A6	ENSP00000269187	3.73188	0.000308161	0.267962	0	3	7	FALSE	8.33333	0	3	0	0.984117	0	1992	0.333333
8932	MBD2	ENSP00000256429	2.94246	3.436e-05	0.339851	0.52381	7	6	FALSE	48.7143	0	7	0	0.988707	0	526	0.252406
7980	TFPI2	ENSP00000222543	3.0046	0	0.332823	1	2	7	FALSE	106.5	0	2	0	0.988345	0	0	0.557592
1066	CES1	ENSP00000353720	0	0	0	0	0	0	TRUE	0	0	0	0	Infinity	0	0	0
673	BRAF	ENSP00000288602	2.67089	0.00237955	0.374408	0.165242	27	6	FALSE	33.9259	0	27	0	0.990286	0	21826	0.0997487
133	ADM	ENSP00000278175	0	0	0	0	0	0	TRUE	0	0	0	0	Infinity	0	0	0
4846	NOS3	ENSP00000297494	2.71922	0.000456501	0.367753	0.222222	9	6	FALSE	53.7778	0	9	0	0.990005	0	4654	0.165128
2983	GUCY1B3	ENSP00000264424	3.02647	6.08941e-05	0.330418	0.333333	3	7	FALSE	58.3333	0	3	0	0.988218	0	326	0.347305
3458	IFNG	ENSP00000229135	0	0	0	0	0	0	TRUE	0	0	0	0	Infinity	0	0	0
27250	PDCD4	ENSP00000280154	2.82163	0.000337733	0.354405	0.142857	8	5	FALSE	39.5	0	8	0	0.989409	0	2632	0.162344
2932	GSK3B	ENSP00000324806	2.33947	0.00630697	0.427447	0.146104	56	6	FALSE	39.875	0	56	0	0.992212	0	64084	0.0720421
57180	ACTR3B	ENSP00000256001	3.03222	1.5108e-05	0.329791	0.333333	4	6	FALSE	39	0	4	0	0.988185	0	216	0.298077
4793	NFKBIB	ENSP00000312988	2.62025	0.000377604	0.381643	0.378788	12	6	FALSE	60.25	0	12	0	0.99058	0	4350	0.153096
27430	MAT2B	ENSP00000325425	2.98619	0.000755642	0.334875	0.1	5	6	FALSE	39	0	5	0	0.988452	0	3188	0.213333
24	ABCA4	ENSP00000359245	0	0	0	0	0	0	TRUE	0	0	0	0	Infinity	0	0	0
54596	L1TD1	ENSP00000419901	3.28884	0	0.304059	0	1	6	FALSE	53	0	1	0	0.986693	0	0	0
54658	UGT1A1	ENSP00000362549	4.44879	0	0.22478	0	1	7	FALSE	6	0	1	0	0.979949	0	0	0
7525	YES1	ENSP00000324740	2.58688	0.00135604	0.386566	0.194737	20	6	FALSE	45.35	0	20	0	0.990774	0	13804	0.112562
6425	SFRP5	ENSP00000266066	1	0	1	0	1	1	FALSE	1	0	1	0	1	0	0	0
29785	CYP2S1	ENSP00000308032	2.87342	0.000217552	0.348018	0	7	6	FALSE	38.2857	0	7	0	0.989108	0	2068	0.181882
8654	PDE5A	ENSP00000347046	0	0	0	0	0	0	TRUE	0	0	0	0	Infinity	0	0	0
291	SLC25A4	ENSP00000281456	3.04373	2.63163e-05	0.328544	0.1	5	6	FALSE	36.2	0	5	0	0.988118	0	236	0.238926
2262	GPC5	ENSP00000366267	0	0	0	0	0	0	TRUE	0	0	0	0	Infinity	0	0	0
4627	MYH9	ENSP00000216181	2.25892	0.0123614	0.44269	0.162842	61	5	FALSE	42.1803	0	61	0	0.992681	0	120382	0.0690081
8714	ABCC3	ENSP00000285238	2.97699	1.23072e-05	0.33591	0.333333	3	6	FALSE	68	0	3	0	0.988506	0	216	0.378026
5151	PDE8A	ENSP00000311453	3.69275	0	0.270801	0	1	6	FALSE	15	0	1	0	0.984344	0	0	0
1021	CDK6	ENSP00000265734	2.43728	0.00143826	0.410293	0.342817	38	5	FALSE	49.0263	0	38	0	0.991644	0	21302	0.0972222
51435	SCARA3	ENSP00000301904	3.01266	0.00130273	0.331933	0.0277778	9	6	FALSE	17.6667	0	9	0	0.988298	0	8362	0.131944
2915	GRM5	ENSP00000306138	3.18412	1.07147e-05	0.314059	0	3	6	FALSE	29.3333	0	3	0	0.987302	0	110	0.399061
1612	DAPK1	ENSP00000350785	2.67549	0.00108537	0.373763	0.132353	17	6	FALSE	38.8235	0	17	0	0.990259	0	9620	0.110273
5213	PFKM	ENSP00000345771	2.60875	0.000188926	0.383326	0.333333	12	5	FALSE	64.5	0	12	0	0.990647	0	3700	0.162879
3313	HSPA9	ENSP00000297185	2.27043	0.00615623	0.440446	0.152657	46	5	FALSE	51.6087	0	46	0	0.992614	0	81056	0.0837098
231	AKR1B1	ENSP00000285930	2.98044	0.000414874	0.335521	0	3	5	FALSE	58.6667	0	3	0	0.988486	0	3376	0.341223
11186	RASSF1	ENSP00000349547	2.64327	0.000633895	0.37832	0.32	26	6	FALSE	39.7692	0	26	0	0.990446	0	7476	0.11047
3066	HDAC2	ENSP00000430432	2.32451	0.0053232	0.430198	0.205514	57	5	FALSE	45.1404	0	57	0	0.992299	0	68732	0.080005
4331	MNAT1	ENSP00000261245	2.78711	1.30089e-05	0.358794	0.714286	7	6	FALSE	80.5714	0	7	0	0.98961	0	342	0.261596
10645	CAMKK2	ENSP00000312741	2.78021	0.000502399	0.359685	0.107143	8	6	FALSE	45.25	0	8	0	0.98965	0	3874	0.162455
5148	PDE6G	ENSP00000328412	3.15995	0	0.31646	0	1	6	FALSE	84	0	1	0	0.987442	0	0	0
51701	NLK	ENSP00000384625	2.78136	0.00240982	0.359537	0.155556	10	6	FALSE	45.2	0	10	0	0.989643	0	16604	0.163869
8565	YARS	ENSP00000362576	2.65362	0.00233872	0.376843	0.357143	8	5	FALSE	82.875	0	8	0	0.990386	0	14864	0.229224
10097	ACTR2	ENSP00000367220	2.52014	0.00231341	0.396804	0.263158	19	5	FALSE	53.0526	0	19	0	0.991162	0	22308	0.118304
7857	SCG2	ENSP00000304133	0	0	0	0	0	0	TRUE	0	0	0	0	Infinity	0	0	0
10188	TNK2	ENSP00000371341	2.52014	0.00160838	0.396804	0.206522	24	5	FALSE	48.0417	0	24	0	0.991162	0	19044	0.106667
23236	PLCB1	ENSP00000338185	0	0	0	0	0	0	TRUE	0	0	0	0	Infinity	0	0	0
5837	PYGM	ENSP00000164139	3.16686	7.10428e-07	0.31577	0	2	6	FALSE	39.5	0	2	0	0.987402	0	12	0.557971
7498	XDH	ENSP00000368727	0	0	0	0	0	0	TRUE	0	0	0	0	Infinity	0	0	0
9088	PKMYT1	ENSP00000262300	3.07365	1.0737e-05	0.325346	0.1	5	6	FALSE	37.2	0	5	0	0.987944	0	176	0.281538
111	ADCY5	ENSP00000419361	3.28193	0.000192924	0.304698	0	2	6	FALSE	23	0	2	0	0.986733	0	1232	0.5
2002	ELK1	ENSP00000247161	2.72727	7.10298e-05	0.366667	0.333333	9	6	FALSE	59.7778	0	9	0	0.989958	0	1244	0.184156
5062	PAK2	ENSP00000314067	2.52474	0.000719108	0.39608	0.24183	18	5	FALSE	51.0556	0	18	0	0.991135	0	10996	0.113586
5143	PDE4C	ENSP00000347689	0	0	0	0	0	0	TRUE	0	0	0	0	Infinity	0	0	0
3315	HSPB1	ENSP00000248553	2.28423	0.0153025	0.437783	0.110383	61	5	FALSE	38.3279	0	61	0	0.992534	0	125988	0.0656301
79885	HDAC11	ENSP00000295757	2.86536	0.00033963	0.348996	0.155556	10	6	FALSE	41.6	0	10	0	0.989155	0	3590	0.188532
4102	MAGEA3	ENSP00000359301	3.28884	0	0.304059	0	1	6	FALSE	53	0	1	0	0.986693	0	0	0
3811	KIR3DL1	ENSP00000375608	3.49022	0	0.286515	0	1	6	FALSE	23	0	1	0	0.985522	0	0	0
5914	RARA	ENSP00000254066	2.54776	0.00341982	0.392502	0.1875	33	6	FALSE	40.1818	0	33	0	0.991001	0	37598	0.0954545
2288	FKBP4	ENSP00000001008	2.50863	0.00117602	0.398624	0.189474	20	5	FALSE	56.75	0	20	0	0.991229	0	13950	0.123529
22989	MYH15	ENSP00000273353	0	0	0	0	0	0	TRUE	0	0	0	0	Infinity	0	0	0
22933		ENSP00000249396	2.89183	0.000263705	0.345802	0.25	8	6	FALSE	50	0	8	0	0.989001	0	2304	0.213141
9052	GPRC5A	ENSP00000014914	2.81933	1.95223e-05	0.354694	0.6	6	6	FALSE	66	0	6	0	0.989422	0	536	0.255814
5587	PRKD1	ENSP00000333568	2.70426	0.000227617	0.369787	0.166667	13	6	FALSE	47.6154	0	13	0	0.990092	0	2986	0.142758
4881	NPR1	ENSP00000357669	0	0	0	0	0	0	TRUE	0	0	0	0	Infinity	0	0	0
9429	ABCG2	ENSP00000237612	4.10127	0	0.243827	0	1	7	FALSE	11	0	1	0	0.981969	0	0	0
5872	RAB13	ENSP00000357564	2.88838	0.00240515	0.346215	0	4	7	FALSE	64.75	0	4	0	0.989021	0	14954	0.274784
2539	G6PD	ENSP00000377192	2.65362	0.00332853	0.376843	0.166667	16	5	FALSE	40	0	16	0	0.990386	0	23460	0.115761
1734	DIO2	ENSP00000450980	0	0	0	0	0	0	TRUE	0	0	0	0	Infinity	0	0	0
2011	MARK2	ENSP00000385751	2.6099	0.000557628	0.383157	0.141667	16	5	FALSE	48.3125	0	16	0	0.99064	0	6866	0.123554
4353	MPO	ENSP00000225275	3.09321	0.0023015	0.323289	0	2	6	FALSE	71.5	0	2	0	0.98783	0	14868	0.5
10595	ERN2	ENSP00000256797	0	0	0	0	0	0	TRUE	0	0	0	0	Infinity	0	0	0
4306	NR3C2	ENSP00000341390	3.08631	9.7645e-06	0.324012	0.166667	4	6	FALSE	36	0	4	0	0.98787	0	124	0.311404
8864	PER2	ENSP00000254657	2.89758	1.0338e-05	0.345115	0.7	5	6	FALSE	55.2	0	5	0	0.988968	0	104	0.253211
3297	HSF1	ENSP00000431512	2.74338	0.000310863	0.364513	0.10989	14	6	FALSE	48.8571	0	14	0	0.989864	0	3356	0.160537
2488	FSHB	ENSP00000254122	0	0	0	0	0	0	TRUE	0	0	0	0	Infinity	0	0	0
3804	KIR2DL3	ENSP00000342215	3.06559	0	0.326201	0	1	7	FALSE	162	0	1	0	0.987991	0	0	0
898	CCNE1	ENSP00000262643	2.66168	0.000315185	0.375703	0.37	25	6	FALSE	46.84	0	25	0	0.990339	0	5140	0.133447
2101	ESRRA	ENSP00000000442	2.87917	0.000255113	0.347322	0.236364	11	7	FALSE	40.3636	0	11	0	0.989075	0	3032	0.172454
10096	ACTR3	ENSP00000263238	2.59839	0.00127875	0.384854	0.308824	17	5	FALSE	52.3529	0	17	0	0.990707	0	15966	0.134432
7052	TGM2	ENSP00000355330	2.43498	0.0022953	0.410681	0.13	25	6	FALSE	46.08	0	25	0	0.991657	0	24618	0.0910099
191	AHCY	ENSP00000217426	2.60299	0.00218529	0.384173	0.150327	18	5	FALSE	45.5	0	18	0	0.99068	0	20610	0.115646
10550	ARL6IP5	ENSP00000273258	2.98044	1.04714e-05	0.335521	0.333333	3	6	FALSE	63.6667	0	3	0	0.988486	0	140	0.361905
3559	IL2RA	ENSP00000369293	0	0	0	0	0	0	TRUE	0	0	0	0	Infinity	0	0	0
2153	F5	ENSP00000356771	3.3084	0.00463794	0.302261	0	3	6	FALSE	15.3333	0	3	0	0.986579	0	22628	0.333333
375790	AGRN	ENSP00000368678	3.09551	0	0.323048	0	1	6	FALSE	142	0	1	0	0.987817	0	0	0
6446	SGK1	ENSP00000356832	2.91945	0.00265984	0.342531	0.0769231	13	6	FALSE	25.3077	0	13	0	0.98884	0	22768	0.126123
4322	MMP13	ENSP00000260302	0	0	0	0	0	0	TRUE	0	0	0	0	Infinity	0	0	0
2049	EPHB3	ENSP00000332118	3.21519	1.78417e-06	0.311024	0	2	6	FALSE	69.5	0	2	0	0.987121	0	60	0.590517
4048	LTA4H	ENSP00000228740	2.93671	0.000321004	0.340517	0	4	5	FALSE	67.25	0	4	0	0.98874	0	1864	0.309579
5947	RBP1	ENSP00000232219	3.28308	4.49714e-05	0.304592	0.333333	3	7	FALSE	26.3333	0	3	0	0.986726	0	404	0.351351
1843	DUSP1	ENSP00000239223	2.90564	0.000185393	0.344158	0.177778	10	6	FALSE	39.9	0	10	0	0.988921	0	2062	0.195567
51412	ACTL6B	ENSP00000160382	2.85846	1.25772e-05	0.349839	0.333333	4	7	FALSE	80.25	0	4	0	0.989195	0	164	0.31746
4057	LTF	ENSP00000231751	2.86766	0.000218248	0.348716	0.2	6	5	FALSE	48.8333	0	6	0	0.989141	0	2806	0.217489
1045	CDX2	ENSP00000370408	2.97123	3.8849e-05	0.336561	0.3	5	6	FALSE	55	0	5	0	0.988539	0	534	0.287368
2104	ESRRG	ENSP00000386171	2.80092	0.000328313	0.357025	0.285714	7	7	FALSE	57.2857	0	7	0	0.98953	0	3426	0.195027
2817	GPC1	ENSP00000264039	2.74108	0.00128182	0.364819	0.141667	16	6	FALSE	34.625	0	16	0	0.989877	0	12728	0.118966
837	CASP4	ENSP00000388566	2.73993	0.000410067	0.364973	0.190476	7	6	FALSE	56.5714	0	7	0	0.989884	0	3850	0.181442
23411	SIRT1	ENSP00000212015	2.41657	0.00707133	0.41381	0.150714	62	6	FALSE	37.9032	0	62	0	0.991764	0	77148	0.0768501
8408	ULK1	ENSP00000324560	2.97353	0.000153927	0.3363	0.25	8	6	FALSE	28.5	0	8	0	0.988526	0	1362	0.183442
7150	TOP1	ENSP00000354522	2.35788	0.00331292	0.424109	0.289231	26	5	FALSE	59.1154	0	26	0	0.992105	0	31750	0.105238
4255	MGMT	ENSP00000302111	2.59954	0.00143009	0.384683	0.195238	21	6	FALSE	43.5714	0	21	0	0.9907	0	14454	0.113219
7059	THBS3	ENSP00000357362	3.14269	0.00249948	0.318198	0	8	6	FALSE	12	0	8	0	0.987542	0	16076	0.139241
10965	ACOT2	ENSP00000238651	3.50518	0	0.285292	1	2	6	FALSE	18	0	2	0	0.985435	0	0	0.545455
7284	TUFM	ENSP00000322439	2.50633	0.00570037	0.39899	0.166008	23	5	FALSE	48.087	0	23	0	0.991242	0	44090	0.106098
138428	PTRH1	ENSP00000418661	0	0	0	0	0	0	TRUE	0	0	0	0	Infinity	0	0	0
4087	SMAD2	ENSP00000262160	2.46835	0.00466383	0.405128	0.173542	38	6	FALSE	42.9474	0	38	0	0.991463	0	47620	0.0906309
58498		ENSP00000223364	0	0	0	0	0	0	TRUE	0	0	0	0	Infinity	0	0	0
9970	NR1I3	ENSP00000356958	2.96087	5.57829e-05	0.337738	0.285714	7	6	FALSE	39	0	7	0	0.9886	0	1056	0.235498
81569	ACTL8	ENSP00000364555	4.10127	0	0.243827	0	1	7	FALSE	11	0	1	0	0.981969	0	0	0
4625	MYH7	ENSP00000347507	3.17376	0.000935332	0.315083	0.333333	3	6	FALSE	36	0	3	0	0.987362	0	7470	0.367698
5142	PDE4B	ENSP00000332116	2.95282	0.000260501	0.338659	0.166667	4	5	FALSE	50.5	0	4	0	0.988646	0	1516	0.271739
136	ADORA2B	ENSP00000304501	0	0	0	0	0	0	TRUE	0	0	0	0	Infinity	0	0	0
796	CALCA	ENSP00000331746	4.30265	0	0.232415	0	1	8	FALSE	5	0	1	0	0.980799	0	0	0
120892	LRRK2	ENSP00000298910	2.52819	0.00542258	0.395539	0.104762	36	6	FALSE	31.2222	0	36	0	0.991115	0	46680	0.0733753
112724	RDH13	ENSP00000391121	2.80667	0.00510558	0.356294	0.1	5	6	FALSE	65.2	0	5	0	0.989496	0	26524	0.234058
5289	PIK3C3	ENSP00000262039	2.77791	0.000218822	0.359983	0.190476	7	5	FALSE	57.2857	0	7	0	0.989663	0	1648	0.195385
3362	HTR6	ENSP00000289753	3.08055	5.255e-05	0.324617	0.2	6	6	FALSE	26.5	0	6	0	0.987904	0	410	0.239394
4618	MYF6	ENSP00000228641	3.3855	0	0.295377	0	1	7	FALSE	50	0	1	0	0.986131	0	0	0
116443	GRIN3A	ENSP00000355155	3.53395	1.60955e-05	0.28297	0	2	7	FALSE	15.5	0	2	0	0.985268	0	144	0.5
7915	ALDH5A1	ENSP00000314649	3.29459	1.3786e-05	0.303528	0	2	6	FALSE	25.5	0	2	0	0.986659	0	152	0.521277
3659	IRF1	ENSP00000245414	2.9252	0.000106959	0.341857	0.142857	7	6	FALSE	38.2857	0	7	0	0.988807	0	944	0.20765
4622	MYH4	ENSP00000255381	3.0725	0.00146502	0.325468	0	4	7	FALSE	42	0	4	0	0.987951	0	12586	0.277027
1278	COL1A2	ENSP00000297268	2.96548	0.000183311	0.337214	0	4	6	FALSE	44.75	0	4	0	0.988573	0	1736	0.265152
5443	POMC	ENSP00000264708	3.05754	0.000226213	0.327061	0	2	7	FALSE	83	0	2	0	0.988038	0	614	0.5
9131	AIFM1	ENSP00000287295	2.53049	0.00391786	0.39518	0.182266	29	5	FALSE	42.0345	0	29	0	0.991102	0	38408	0.0955934
239	ALOX12	ENSP00000251535	3.21979	3.77609e-05	0.310579	0	3	6	FALSE	26.6667	0	3	0	0.987094	0	186	0.356481
1889	ECE1	ENSP00000364028	3.3038	0.00242037	0.302682	0.1	5	7	FALSE	9.2	0	5	0	0.986606	0	11088	0.220513
5207	PFKFB1	ENSP00000364145	2.82509	0.000104695	0.353971	0.333333	3	6	FALSE	100	0	3	0	0.989389	0	1206	0.393939
131	ADH7	ENSP00000420269	0	0	0	0	0	0	TRUE	0	0	0	0	Infinity	0	0	0
1579	CYP4A11	ENSP00000311095	1	0	1	0	1	1	FALSE	1	0	1	0	1	0	0	0
4069	LYZ	ENSP00000261267	2.66168	0.00022488	0.375703	0.25	9	5	FALSE	65.2222	0	9	0	0.990339	0	3438	0.187101
1456		ENSP00000353904	3.03682	0.00015542	0.329291	0.3	5	6	FALSE	34.6	0	5	0	0.988158	0	1024	0.216352
4953	ODC1	ENSP00000234111	0	0	0	0	0	0	TRUE	0	0	0	0	Infinity	0	0	0
8837	CFLAR	ENSP00000312455	2.771	0.000898833	0.36088	0.314286	15	6	FALSE	36.6	0	15	0	0.989703	0	9160	0.123008
444	ASPH	ENSP00000368767	2.71922	0.000261936	0.367753	0.190476	7	6	FALSE	65	0	7	0	0.990005	0	3338	0.192031
9657	IQCB1	ENSP00000311505	2.6893	0.00302253	0.371844	0.0606061	22	6	FALSE	30	0	22	0	0.990178	0	27002	0.094697
10858		ENSP00000261835	3.87917	0	0.257787	0	1	7	FALSE	12	0	1	0	0.983261	0	0	0
3716	JAK1	ENSP00000343204	2.48907	0.00176337	0.401757	0.216092	30	5	FALSE	45.3	0	30	0	0.991343	0	22818	0.0969308
4620	MYH2	ENSP00000245503	3.084	7.87504e-06	0.324254	0	2	7	FALSE	79.5	0	2	0	0.987884	0	180	0.545139
4363	ABCC1	ENSP00000382342	2.69275	3.45142e-05	0.371368	0.47619	7	5	FALSE	78.7143	0	7	0	0.990158	0	1230	0.237376
196883	ADCY4	ENSP00000312126	3.97008	0	0.251884	0	1	7	FALSE	6	0	1	0	0.982732	0	0	0
6615	SNAI1	ENSP00000244050	2.44074	0.00371068	0.409712	0.132367	46	6	FALSE	40.3913	0	46	0	0.991624	0	43692	0.0833184
3565	IL4	ENSP00000231449	0	0	0	0	0	0	TRUE	0	0	0	0	Infinity	0	0	0
3351	HTR1B	ENSP00000358963	0	0	0	0	0	0	TRUE	0	0	0	0	Infinity	0	0	0
128	ADH5	ENSP00000296412	2.65938	0.000186597	0.376028	0.285714	8	6	FALSE	72.875	0	8	0	0.990352	0	2892	0.202646
9891	NUAK1	ENSP00000261402	2.74338	4.54326e-05	0.364513	0	3	6	FALSE	120.667	0	3	0	0.989864	0	1268	0.391068
64220	STRA6	ENSP00000456609	3.09551	0	0.323048	0	1	6	FALSE	155	0	1	0	0.987817	0	0	0
6793	STK10	ENSP00000176763	0	0	0	0	0	0	TRUE	0	0	0	0	Infinity	0	0	0
7016	TESK1	ENSP00000338127	3.43728	0	0.290927	0	1	6	FALSE	17	0	1	0	0.98583	0	0	0
658	BMPR1B	ENSP00000264568	3.05754	0.000144821	0.327061	0	2	7	FALSE	84	0	2	0	0.988038	0	632	0.50303
43	ACHE	ENSP00000303211	3.06559	0	0.326201	0	1	7	FALSE	162	0	1	0	0.987991	0	0	0
2778	GNAS	ENSP00000360141	2.67434	0.0046585	0.373924	0.0757576	12	5	FALSE	48.0833	0	12	0	0.990265	0	29642	0.138484
6611	SMS	ENSP00000385746	3.03567	0.000385014	0.329416	0.333333	3	5	FALSE	59	0	3	0	0.988165	0	2924	0.349206
1509	CTSD	ENSP00000236671	2.67894	0.000282979	0.373282	0.333333	7	6	FALSE	74.8571	0	7	0	0.990239	0	2340	0.212256
762	CA4	ENSP00000300900	3.49827	0	0.285855	0	1	7	FALSE	18	0	1	0	0.985475	0	0	0
6790	AURKA	ENSP00000216911	2.33832	0.0101106	0.427657	0.167347	50	6	FALSE	43.86	0	50	0	0.992219	0	88330	0.0781429
2046	EPHA8	ENSP00000166244	3.49137	1.29169e-05	0.286421	0	2	7	FALSE	32	0	2	0	0.985515	0	138	0.516667
5293	PIK3CD	ENSP00000366563	3.50058	1.08669e-05	0.285667	0	2	7	FALSE	13.5	0	2	0	0.985462	0	72	0.5
509	ATP5C1	ENSP00000349142	2.4557	0.00170407	0.407216	0.274854	19	5	FALSE	58.1053	0	19	0	0.991537	0	17462	0.116806
5210	PFKFB4	ENSP00000232375	3.01266	2.17962e-05	0.331933	0.3	5	7	FALSE	42.8	0	5	0	0.988298	0	200	0.273548
3354	HTR1E	ENSP00000307766	3.19678	3.15309e-06	0.312815	0	3	6	FALSE	32	0	3	0	0.987228	0	62	0.43662
5894	RAF1	ENSP00000251849	2.46145	0.00412191	0.406265	0.165714	50	6	FALSE	37.98	0	50	0	0.991503	0	43758	0.0799158
94	ACVRL1	ENSP00000373574	3.2244	7.00467e-05	0.310136	0.333333	6	6	FALSE	16.5	0	6	0	0.987067	0	494	0.217778
23532	PRAME	ENSP00000381726	3.21749	1.46766e-05	0.310801	0.166667	4	6	FALSE	27.75	0	4	0	0.987108	0	210	0.309659
51109	RDH11	ENSP00000370750	3.0702	0.000111744	0.325712	0	2	6	FALSE	80.5	0	2	0	0.987964	0	568	0.5
9611	NCOR1	ENSP00000268712	2.48331	0.00346488	0.402688	0.220732	41	6	FALSE	40.9024	0	41	0	0.991376	0	39658	0.0875333
839	CASP6	ENSP00000265164	2.76064	0.000136519	0.362234	0.47619	7	6	FALSE	64.7143	0	7	0	0.989764	0	2012	0.216436
7298	TYMS	ENSP00000315644	3.24166	2.05063e-05	0.308484	0	3	7	FALSE	24.6667	0	3	0	0.986967	0	132	0.348039
53944		ENSP00000305777	2.89298	0.000113142	0.345664	0.333333	4	6	FALSE	64	0	4	0	0.988994	0	1166	0.283333
1381	CRABP1	ENSP00000299529	3.26352	0	0.306417	0	1	6	FALSE	87	0	1	0	0.98684	0	0	0
1459	CSNK2A2	ENSP00000262506	2.50518	0.00634587	0.399173	0.169231	26	5	FALSE	43.5	0	26	0	0.991249	0	45938	0.0961965
4067	LYN	ENSP00000428924	2.41427	0.00479804	0.414204	0.134615	40	5	FALSE	40.075	0	40	0	0.991778	0	47594	0.0787894
1149	CIDEA	ENSP00000320209	0	0	0	0	0	0	TRUE	0	0	0	0	Infinity	0	0	0
2261	FGFR3	ENSP00000339824	2.98389	0.000380761	0.335133	0.166667	9	6	FALSE	27.4444	0	9	0	0.988466	0	2664	0.16431
5265	SERPINA1	ENSP00000348068	2.85386	0.000302763	0.350403	0.3	5	6	FALSE	62.4	0	5	0	0.989222	0	2222	0.271616
11183	MAP4K5	ENSP00000013125	3.00345	8.33209e-06	0.33295	0.333333	3	6	FALSE	66.3333	0	3	0	0.988352	0	132	0.37931
4642	MYO1D	ENSP00000324527	2.65017	0.000368934	0.377334	0.181818	11	6	FALSE	61.5455	0	11	0	0.990406	0	5228	0.169296
5291	PIK3CB	ENSP00000289153	2.6985	0.000173532	0.370576	0.244444	10	5	FALSE	60.4	0	10	0	0.990125	0	2328	0.180539
6356	CCL11	ENSP00000302234	0	0	0	0	0	0	TRUE	0	0	0	0	Infinity	0	0	0
780	DDR1	ENSP00000365759	3.09091	0.000245472	0.323529	0.166667	4	6	FALSE	40.75	0	4	0	0.987844	0	1814	0.283451
5214	PFKP	ENSP00000370517	2.54085	0.00225045	0.393569	0.266667	16	5	FALSE	59.375	0	16	0	0.991042	0	20148	0.136521
60	ACTB	ENSP00000349960	2.33832	0.00929871	0.427657	0.162602	42	6	FALSE	48.619	0	42	0	0.992219	0	89738	0.0857311
301	ANXA1	ENSP00000257497	2.48216	0.00183407	0.402874	0.2	16	6	FALSE	65.5625	0	16	0	0.991383	0	17682	0.136458
6818	SULT1A3	ENSP00000343645	3.05639	0.00199521	0.327184	0.333333	4	7	FALSE	42.75	0	4	0	0.988044	0	9436	0.257576
51067	YARS2	ENSP00000320658	3.65247	0	0.273787	0	1	6	FALSE	8	0	1	0	0.984579	0	0	0
22926	ATF6	ENSP00000356919	2.90104	0.00255913	0.344704	0.0952381	7	7	FALSE	39.2857	0	7	0	0.988947	0	18288	0.172063
6323	SCN1A	ENSP00000303540	0	0	0	0	0	0	TRUE	0	0	0	0	Infinity	0	0	0
6331	SCN5A	ENSP00000328968	3.13579	6.03267e-05	0.318899	0	2	6	FALSE	54	0	2	0	0.987583	0	306	0.5
1906	EDN1	ENSP00000368683	0	0	0	0	0	0	TRUE	0	0	0	0	Infinity	0	0	0
1012	CDH13	ENSP00000408632	3.08055	7.67777e-05	0.324617	0	5	7	FALSE	32	0	5	0	0.987904	0	526	0.246032
8243	SMC1A	ENSP00000323421	2.52014	0.00207071	0.396804	0.105072	24	5	FALSE	45.375	0	24	0	0.991162	0	21706	0.10078
11197	WIF1	ENSP00000286574	3.33717	0	0.299655	0	1	7	FALSE	50	0	1	0	0.986412	0	0	0
7249	TSC2	ENSP00000219476	2.56847	0.00110154	0.389337	0.190476	22	5	FALSE	46.8182	0	22	0	0.990881	0	10956	0.111412
6783	SULT1E1	ENSP00000226444	3.05409	0.000777011	0.32743	0	2	7	FALSE	87	0	2	0	0.988058	0	4164	0.5
23408	SIRT5	ENSP00000368552	2.88953	6.16126e-05	0.346077	0	3	6	FALSE	84.3333	0	3	0	0.989014	0	656	0.368732
9074	CLDN6	ENSP00000328674	0	0	0	0	0	0	TRUE	0	0	0	0	Infinity	0	0	0
23474	ETHE1	ENSP00000292147	2.68239	3.78217e-05	0.372801	0.5	4	6	FALSE	125.25	0	4	0	0.990219	0	1484	0.361272
8789	FBP2	ENSP00000364486	3.95282	0	0.252984	0	1	7	FALSE	6	0	1	0	0.982832	0	0	0
4907	NT5E	ENSP00000257770	2.81358	0.000248308	0.355419	0.107143	8	6	FALSE	45.625	0	8	0	0.989456	0	2154	0.181727
5209	PFKFB3	ENSP00000369100	2.86076	0.00057808	0.349558	0.3	5	6	FALSE	60.4	0	5	0	0.989182	0	3490	0.258621
23081	KDM4C	ENSP00000370710	2.9977	1.58769e-05	0.333589	0.6	5	6	FALSE	53.2	0	5	0	0.988385	0	280	0.311111
8428		ENSP00000365730	2.90679	0.000180302	0.344022	0.133333	6	6	FALSE	46.1667	0	6	0	0.988914	0	1524	0.219551
55693	KDM4D	ENSP00000334181	2.96548	6.5409e-06	0.337214	0.333333	3	7	FALSE	86.6667	0	3	0	0.988573	0	164	0.403427
5138	PDE2A	ENSP00000334910	0	0	0	0	0	0	TRUE	0	0	0	0	Infinity	0	0	0
64321	SOX17	ENSP00000297316	0	0	0	0	0	0	TRUE	0	0	0	0	Infinity	0	0	0
11009	IL24	ENSP00000375795	2.6916	0.000442584	0.371526	0.145455	11	6	FALSE	49.1818	0	11	0	0.990165	0	5266	0.144543
81631	MAP1LC3B	ENSP00000268607	2.76064	0.00110427	0.362234	0.131868	14	6	FALSE	34.1429	0	14	0	0.989764	0	8744	0.119807
5610	EIF2AK2	ENSP00000233057	2.45915	0.00151604	0.406645	0.252381	21	5	FALSE	57.7143	0	21	0	0.991517	0	16442	0.116831
6303	SAT1	ENSP00000368572	2.76525	0.000504701	0.361631	0.155556	10	6	FALSE	46.7	0	10	0	0.989737	0	4608	0.160764
27148	STK36	ENSP00000295709	3.70656	0	0.269792	0	1	7	FALSE	13	0	1	0	0.984264	0	0	0
5406	PNLIP	ENSP00000358223	0	0	0	0	0	0	TRUE	0	0	0	0	Infinity	0	0	0
107	ADCY1	ENSP00000297323	0	0	0	0	0	0	TRUE	0	0	0	0	Infinity	0	0	0
2638	GC	ENSP00000421725	3.06214	0.000244586	0.326569	0.107143	8	6	FALSE	19.25	0	8	0	0.988011	0	2304	0.180288
114	ADCY8	ENSP00000286355	3.32796	0	0.300484	0	1	7	FALSE	71	0	1	0	0.986465	0	0	0
139741	ACTRT1	ENSP00000360165	3.18642	8.28074e-07	0.313832	0	2	6	FALSE	38	0	2	0	0.987288	0	16	0.560606
53904	MYO3A	ENSP00000265944	0	0	0	0	0	0	TRUE	0	0	0	0	Infinity	0	0	0
23657	SLC7A11	ENSP00000280612	3.58458	8.88367e-06	0.278973	0	2	7	FALSE	23.5	0	2	0	0.984973	0	80	0.5
4649	MYO9A	ENSP00000348349	3	0	0.333333	0	1	6	FALSE	156	0	1	0	0.988372	0	0	0
2936	GSR	ENSP00000221130	2.93211	2.38796e-05	0.341052	0.5	5	5	FALSE	51.4	0	5	0	0.988767	0	282	0.248309
2569	GABRR1	ENSP00000412673	3.14039	1.42543e-06	0.318432	0	2	6	FALSE	40.5	0	2	0	0.987556	0	20	0.533784
5742	PTGS1	ENSP00000354612	3.25892	0	0.30685	1	2	6	FALSE	25	0	2	0	0.986867	0	0	0.555556
18	ABAT	ENSP00000268251	3.56732	2.19421e-05	0.280323	0	3	6	FALSE	6	0	3	0	0.985074	0	146	0.357143
22848	AAK1	ENSP00000386456	2.74568	5.14784e-05	0.364208	0.333333	4	5	FALSE	97.25	0	4	0	0.989851	0	1934	0.308917

## Sheet: Edges
Suppl. Table 9. Gene targets of all curated SMs - PPI network edges
#BioGRID Interaction ID	Author	BioGRID ID Interactor A	BioGRID ID Interactor B	EdgeBetweenness	Experimental System	Experimental System Type	interaction	Modification	name	Official Symbol Interactor A	Official Symbol Interactor B	Organism Interactor A	Organism Interactor B	Phenotypes	Pubmed ID	Qualifications	Score	Source Database	Synonyms Interactor A	Synonyms Interactor B	Systematic Name Interactor A	Systematic Name Interactor B	Tags	Throughput
1054252	Faber K (2013)	115984	107475	78.6301	Affinity Capture-Western	physical	interacts with	-	10765 (interacts with) 1045	KDM5B	CDX2	9606	9606	-	23202735	-	-	BIOGRID	CT31|JARID1B|PLU-1|PLU1|PPP1R98|PUT1|RBBP2H1A	CDX-3|CDX2/AS|CDX3	-	-	-	Low Throughput
645075	Li Q (2011)	115984	116667	280.914	Reconstituted Complex	physical	interacts with	-	10765 (interacts with) 23028	KDM5B	KDM1A	9606	9606	-	21937684	-	-	BIOGRID	CT31|JARID1B|PLU-1|PLU1|PPP1R98|PUT1|RBBP2H1A	AOF2|BHC110|KDM1|LSD1	-	RP1-184J9.1	-	Low Throughput
1040552	Rolland T (2014)	110729	121415	176.888	Two-hybrid	physical	interacts with	-	4645 (interacts with) 57159	MYO5B	TRIM54	9606	9606	-	25416956	-	-	BIOGRID	-	MURF|MURF-3|RNF30|muRF3	-	-	-	High Throughput
644555	Nijwening JH (2011)	115984	111860	470.489	Affinity Capture-Western	physical	interacts with	-	10765 (interacts with) 5925	KDM5B	RB1	9606	9606	-	21980403	-	-	BIOGRID	CT31|JARID1B|PLU-1|PLU1|PPP1R98|PUT1|RBBP2H1A	OSRC|PPP1R130|RB|p105-Rb|pRb|pp110	-	RP11-174I10.1	-	Low Throughput
645063	Li Q (2011)	115984	114445	49.4816	Affinity Capture-Western	physical	interacts with	-	10765 (interacts with) 8932	KDM5B	MBD2	9606	9606	-	21937684	-	-	BIOGRID	CT31|JARID1B|PLU-1|PLU1|PPP1R98|PUT1|RBBP2H1A	DMTase|NY-CO-41	-	-	-	Low Throughput
645060	Li Q (2011)	115984	109316	345.948	Affinity Capture-Western	physical	interacts with	-	10765 (interacts with) 3066	KDM5B	HDAC2	9606	9606	-	21937684	-	-	BIOGRID	CT31|JARID1B|PLU-1|PLU1|PPP1R98|PUT1|RBBP2H1A	HD2|RPD3|YAF1	-	-	-	Low Throughput
2497429	Jiang X (2017)	107291	111307	207.865	Biochemical Activity	physical	interacts with	Proteolytic Processing	841 (interacts with) 5289	CASP8	PIK3C3	9606	9606	-	28846113	-	-	BIOGRID	ALPS2B|CAP4|Casp-8|FLICE|MACH|MCH5	VPS34|hVps34	-	-	-	Low Throughput
2497929	Finlay D (2007)	107291	112592	513.594	Affinity Capture-Western	physical	interacts with	-	841 (interacts with) 6714	CASP8	SRC	9606	9606	-	18089800	-	-	BIOGRID	ALPS2B|CAP4|Casp-8|FLICE|MACH|MCH5	ASV|SRC1|c-SRC|p60-Src	-	RP5-823N20.1	-	Low Throughput
514083	Xiang Y (2007)	115984	106862	354.664	Affinity Capture-Western	physical	interacts with	-	10765 (interacts with) 367	KDM5B	AR	9606	9606	-	18048344	-	-	BIOGRID	CT31|JARID1B|PLU-1|PLU1|PPP1R98|PUT1|RBBP2H1A	AIS|DHTR|HUMARA|HYSP1|KD|NR3C4|SBMA|SMAX1|TFM	-	RP11-383C12.1	-	Low Throughput
2570223	Seo J (2018)	107291	114302	214.768	Affinity Capture-Western	physical	interacts with	-	841 (interacts with) 8772	CASP8	FADD	9606	9606	-	29795330	-	-	BIOGRID	ALPS2B|CAP4|Casp-8|FLICE|MACH|MCH5	MORT1	-	GIG3	-	Low Throughput
2382447	Xu L (2017)	107291	114323	137.935	Affinity Capture-Western	physical	interacts with	-	841 (interacts with) 8795	CASP8	TNFRSF10B	9606	9606	-	28972304	-	-	BIOGRID	ALPS2B|CAP4|Casp-8|FLICE|MACH|MCH5	CD262|DR5|KILLER|KILLER/DR5|TRAIL-R2|TRAILR2|TRICK2|TRICK2A|TRICK2B|TRICKB|ZTNFR9	-	UNQ160/PRO186	-	Low Throughput
2449243	Xu J (2015)	107291	111507	246.795	Affinity Capture-Western	physical	interacts with	-	841 (interacts with) 5515	CASP8	PPP2CA	9606	9606	-	25551360	-	-	BIOGRID	ALPS2B|CAP4|Casp-8|FLICE|MACH|MCH5	PP2Ac|PP2CA|PP2Calpha|RP-C	-	-	-	Low Throughput
2327528	Kleber S (2008)	107291	106851	90.2074	Affinity Capture-Western	physical	interacts with	-	841 (interacts with) 355	CASP8	FAS	9606	9606	-	18328427	-	-	BIOGRID	ALPS2B|CAP4|Casp-8|FLICE|MACH|MCH5	ALPS1A|APO-1|APT1|CD95|FAS1|FASTM|TNFRSF6	-	RP11-399O19.7	-	Low Throughput
435440	Zhou W (2009)	115984	117332	1308.23	Affinity Capture-MS	physical	interacts with	-	10765 (interacts with) 25800	KDM5B	SLC39A6	9606	9606	-	19336002	-	-	BIOGRID	CT31|JARID1B|PLU-1|PLU1|PPP1R98|PUT1|RBBP2H1A	LIV-1	-	-	-	Low Throughput
435430	Zhou W (2009)	115984	120735	153.572	Affinity Capture-MS	physical	interacts with	-	10765 (interacts with) 55589	KDM5B	BMP2K	9606	9606	-	19336002	-	-	BIOGRID	CT31|JARID1B|PLU-1|PLU1|PPP1R98|PUT1|RBBP2H1A	BIKE	-	HRIHFB2017	-	Low Throughput
1417687	Arroyo R (2015)	107291	111286	254.338	Two-hybrid	physical	interacts with	-	841 (interacts with) 5268	CASP8	SERPINB5	9606	9606	-	25640309	-	-	BIOGRID	ALPS2B|CAP4|Casp-8|FLICE|MACH|MCH5	PI5|maspin	-	-	-	High Throughput
2460224	Ivanov AA (2017)	110391	107464	35.7516	FRET	physical	interacts with	-	4233 (interacts with) 1030	MET	CDKN2B	9606	9606	-	28628118	Time-resolved fluorescence energy transfer (TR-FRET)	-	BIOGRID	AUTS9|HGFR|RCCP2|c-Met	CDK4I|INK4B|MTS2|P15|TP15|p15INK4b	-	RP11-149I2.1	-	High Throughput
2460222	Ivanov AA (2017)	110391	107454	77.3671	FRET	physical	interacts with	-	4233 (interacts with) 1019	MET	CDK4	9606	9606	-	28628118	Time-resolved fluorescence energy transfer (TR-FRET)	-	BIOGRID	AUTS9|HGFR|RCCP2|c-Met	CMM3|PSK-J3	-	-	-	High Throughput
2460223	Ivanov AA (2017)	110391	107456	42.7685	FRET	physical	interacts with	-	4233 (interacts with) 1021	MET	CDK6	9606	9606	-	28628118	Time-resolved fluorescence energy transfer (TR-FRET)	-	BIOGRID	AUTS9|HGFR|RCCP2|c-Met	MCPH12|PLSTIRE	-	-	-	High Throughput
2460226	Ivanov AA (2017)	110391	112874	76.231	FRET	physical	interacts with	-	4233 (interacts with) 7015	MET	TERT	9606	9606	-	28628118	Time-resolved fluorescence energy transfer (TR-FRET)	-	BIOGRID	AUTS9|HGFR|RCCP2|c-Met	CMM9|DKCA2|DKCB4|EST2|PFBMFT1|TCS1|TP2|TRT|hEST2|hTRT	-	-	-	High Throughput
2533323	Jahangiri A (2017)	110391	109894	90.2334	Far Western	physical	interacts with	-	4233 (interacts with) 3688	MET	ITGB1	9606	9606	-	28973887	-	-	BIOGRID	AUTS9|HGFR|RCCP2|c-Met	CD29|FNRB|GPIIA|MDF2|MSK12|VLA-BETA|VLAB	-	RP11-479G22.2	-	Low Throughput
1417679	Arroyo R (2015)	107291	116199	151.96	Two-hybrid	physical	interacts with	-	841 (interacts with) 11009	CASP8	IL24	9606	9606	-	25640309	-	-	BIOGRID	ALPS2B|CAP4|Casp-8|FLICE|MACH|MCH5	C49A|FISP|IL10B|MDA7|MOB5|ST16	-	-	-	High Throughput
2458969	Ivanov AA (2017)	110391	107334	46.875	FRET	physical	interacts with	-	4233 (interacts with) 894	MET	CCND2	9606	9606	-	28628118	Time-resolved fluorescence energy transfer (TR-FRET)	-	BIOGRID	AUTS9|HGFR|RCCP2|c-Met	KIAK0002|MPPH3	-	-	-	High Throughput
2206337	Liu X (2011)	110391	108377	94.8216	Affinity Capture-Western	physical	interacts with	-	4233 (interacts with) 2065	MET	ERBB3	9606	9606	-	21918175	-	-	BIOGRID	AUTS9|HGFR|RCCP2|c-Met	ErbB-3|HER3|LCCS2|MDA-BF-1|c-erbB-3|c-erbB3|erbB3-S|p180-ErbB3|p45-sErbB3|p85-sErbB3	-	-	-	Low Throughput
2206338	Liu X (2011)	110391	108276	330.251	Affinity Capture-Western	physical	interacts with	-	4233 (interacts with) 1956	MET	EGFR	9606	9606	-	21918175	-	-	BIOGRID	AUTS9|HGFR|RCCP2|c-Met	ERBB|ERBB1|HER1|NISBD2|PIG61|mENA	-	-	-	Low Throughput
2458972	Ivanov AA (2017)	110391	112670	68.7896	FRET	physical	interacts with	-	4233 (interacts with) 6794	MET	STK11	9606	9606	-	28628118	Time-resolved fluorescence energy transfer (TR-FRET)	-	BIOGRID	AUTS9|HGFR|RCCP2|c-Met	LKB1|PJS|hLKB1	-	-	-	High Throughput
2458970	Ivanov AA (2017)	110391	108288	39.0804	FRET	physical	interacts with	-	4233 (interacts with) 1969	MET	EPHA2	9606	9606	-	28628118	Time-resolved fluorescence energy transfer (TR-FRET)	-	BIOGRID	AUTS9|HGFR|RCCP2|c-Met	ARCC2|CTPA|CTPP1|CTRCT6|ECK	-	-	-	High Throughput
1417673	Arroyo R (2015)	107291	107447	328.062	Two-hybrid	physical	interacts with	-	841 (interacts with) 1012	CASP8	CDH13	9606	9606	-	25640309	-	-	BIOGRID	ALPS2B|CAP4|Casp-8|FLICE|MACH|MCH5	CDHH|P105	-	-	-	High Throughput
1509337	Gui Y (2015)	110391	114203	50.6115	Affinity Capture-Western	physical	interacts with	-	4233 (interacts with) 8651	MET	SOCS1	9606	9606	-	25728680	Figure 2	-	BIOGRID	AUTS9|HGFR|RCCP2|c-Met	CIS1|CISH1|JAB|SOCS-1|SSI-1|SSI1|TIP3	-	-	-	Low Throughput
1059421	Betin VM (2009)	107291	106652	227.317	Biochemical Activity	physical	interacts with	Proteolytic Processing	841 (interacts with) 142	CASP8	PARP1	9606	9606	-	19549685	-	-	BIOGRID	ALPS2B|CAP4|Casp-8|FLICE|MACH|MCH5	ADPRT|ADPRT 1|ADPRT1|ARTD1|PARP|PARP-1|PPOL|pADPRT-1	-	RP11-125A15.2	-	Low Throughput
330728	Boccaccio C (1998)	110391	112651	126.483	Affinity Capture-Western	physical	interacts with	-	4233 (interacts with) 6774	MET	STAT3	9606	9606	-	9440692	-	-	BIOGRID	AUTS9|HGFR|RCCP2|c-Met	ADMIO|APRF|HIES	-	-	-	Low Throughput
1054751	Feoktistova M (2011)	107291	114364	78.7668	Affinity Capture-Western	physical	interacts with	-	841 (interacts with) 8837	CASP8	CFLAR	9606	9606	-	21737330	-	-	BIOGRID	ALPS2B|CAP4|Casp-8|FLICE|MACH|MCH5	CASH|CASP8AP1|CLARP|Casper|FLAME|FLAME-1|FLAME1|FLIP|I-FLICE|MRIT|c-FLIP|c-FLIPL|c-FLIPR|c-FLIPS	-	-	-	Low Throughput
1054752	Feoktistova M (2011)	107291	107293	118.305	Affinity Capture-Western	physical	interacts with	-	841 (interacts with) 843	CASP8	CASP10	9606	9606	-	21737330	-	-	BIOGRID	ALPS2B|CAP4|Casp-8|FLICE|MACH|MCH5	ALPS2|FLICE2|MCH4	-	-	-	Low Throughput
1057288	Zhu J (2005)	107291	107068	88.7027	Affinity Capture-Western	physical	interacts with	-	841 (interacts with) 596	CASP8	BCL2	9606	9606	-	16183855	-	-	BIOGRID	ALPS2B|CAP4|Casp-8|FLICE|MACH|MCH5	Bcl-2|PPP1R50	-	-	-	Low Throughput
1448964	Hein MY (2015)	113870	114445	35.5987	Affinity Capture-MS	physical	interacts with	-	8242 (interacts with) 8932	KDM5C	MBD2	9606	9606	-	26496610	interaction detected by quantitative BAC-GFP interactomics (QUBIC)	-	BIOGRID	DXS1272E|JARID1C|MRX13|MRXJ|MRXSCJ|MRXSJ|SMCX|XE169	DMTase|NY-CO-41	RP11-258C19.2	-	-	High Throughput
245375	Davies G (2001)	110391	107880	210.861	Affinity Capture-Western	physical	interacts with	-	4233 (interacts with) 1499	MET	CTNNB1	9606	9606	-	11254878	-	-	BIOGRID	AUTS9|HGFR|RCCP2|c-Met	CTNNB|MRD19|armadillo	-	OK/SW-cl.35	-	Low Throughput
1444026	Hein MY (2015)	113870	107841	387.608	Affinity Capture-MS	physical	interacts with	-	8242 (interacts with) 1457	KDM5C	CSNK2A1	9606	9606	-	26496610	interaction detected by quantitative BAC-GFP interactomics (QUBIC)	-	BIOGRID	DXS1272E|JARID1C|MRX13|MRXJ|MRXSCJ|MRXSJ|SMCX|XE169	CK2A1|CKII|CSNK2A3	RP11-258C19.2	-	-	High Throughput
854323	Lemaire C (2005)	107291	111860	245.68	Biochemical Activity	physical	interacts with	Proteolytic Processing	841 (interacts with) 5925	CASP8	RB1	9606	9606	-	15735701	figure 5.	-	BIOGRID	ALPS2B|CAP4|Casp-8|FLICE|MACH|MCH5	OSRC|PPP1R130|RB|p105-Rb|pRb|pp110	-	RP11-174I10.1	-	Low Throughput
720311	Yao Z (2007)	107291	113010	788.246	Affinity Capture-Western	physical	interacts with	-	841 (interacts with) 7157	CASP8	TP53	9606	9606	-	17290218	-	-	BIOGRID	ALPS2B|CAP4|Casp-8|FLICE|MACH|MCH5	BCC7|LFS1|P53|TRP53	-	-	-	Low Throughput
725209	Chandra D (2004)	107291	107286	106.816	Biochemical Activity	physical	interacts with	Proteolytic Processing	841 (interacts with) 836	CASP8	CASP3	9606	9606	-	15254227	-	-	BIOGRID	ALPS2B|CAP4|Casp-8|FLICE|MACH|MCH5	CPP32|CPP32B|SCA-1	-	-	-	Low Throughput
644549	Liang Z (2011)	113870	111142	244.907	Affinity Capture-Western	physical	interacts with	-	8242 (interacts with) 5111	KDM5C	PCNA	9606	9606	-	21996408	-	-	BIOGRID	DXS1272E|JARID1C|MRX13|MRXJ|MRXSCJ|MRXSJ|SMCX|XE169	ATLD2	RP11-258C19.2	-	-	Low Throughput
337992	Tahiliani M (2007)	113870	109316	214.822	Affinity Capture-MS	physical	interacts with	-	8242 (interacts with) 3066	KDM5C	HDAC2	9606	9606	-	17468742	-	-	BIOGRID	DXS1272E|JARID1C|MRX13|MRXJ|MRXSCJ|MRXSJ|SMCX|XE169	HD2|RPD3|YAF1	RP11-258C19.2	-	-	Low Throughput
337991	Tahiliani M (2007)	113870	109315	289.063	Affinity Capture-MS	physical	interacts with	-	8242 (interacts with) 3065	KDM5C	HDAC1	9606	9606	-	17468742	-	-	BIOGRID	DXS1272E|JARID1C|MRX13|MRXJ|MRXSCJ|MRXSJ|SMCX|XE169	GON-10|HD1|RPD3|RPD3L1	RP11-258C19.2	RP4-811H24.2	-	Low Throughput
720309	Yao Z (2007)	107291	111580	283.303	Affinity Capture-Western	physical	interacts with	-	841 (interacts with) 5594	CASP8	MAPK1	9606	9606	-	17290218	-	-	BIOGRID	ALPS2B|CAP4|Casp-8|FLICE|MACH|MCH5	ERK|ERK-2|ERK2|ERT1|MAPK2|P42MAPK|PRKM1|PRKM2|p38|p40|p41|p41mapk|p42-MAPK	-	-	-	Low Throughput
337990	Tahiliani M (2007)	113870	111910	93.8404	Affinity Capture-MS	physical	interacts with	-	8242 (interacts with) 5978	KDM5C	REST	9606	9606	-	17468742	-	-	BIOGRID	DXS1272E|JARID1C|MRX13|MRXJ|MRXSCJ|MRXSJ|SMCX|XE169	NRSF|XBR	RP11-258C19.2	-	-	Low Throughput
337989	Tahiliani M (2007)	113870	114973	141.826	Affinity Capture-MS	physical	interacts with	-	8242 (interacts with) 9611	KDM5C	NCOR1	9606	9606	-	17468742	-	-	BIOGRID	DXS1272E|JARID1C|MRX13|MRXJ|MRXSCJ|MRXSJ|SMCX|XE169	N-CoR|N-CoR1|PPP1R109|TRAC1|hN-CoR	RP11-258C19.2	-	-	Low Throughput
483628	Scott FL (2008)	107291	119613	135.738	Biochemical Activity	physical	interacts with	Proteolytic Processing	841 (interacts with) 51564	CASP8	HDAC7	9606	9606	-	18458084	-	-	BIOGRID	ALPS2B|CAP4|Casp-8|FLICE|MACH|MCH5	HD7A|HDAC7A	-	-	-	Low Throughput
307674	Srinivasula SM (1996)	107291	107285	360.634	Biochemical Activity	physical	interacts with	Proteolytic Processing	841 (interacts with) 835	CASP8	CASP2	9606	9606	-	8962078	-	-	BIOGRID	ALPS2B|CAP4|Casp-8|FLICE|MACH|MCH5	CASP-2|ICH1|NEDD-2|NEDD2|PPP1R57	-	-	-	Low Throughput
307675	Srinivasula SM (1996)	107291	107287	185.967	Biochemical Activity	physical	interacts with	Proteolytic Processing	841 (interacts with) 837	CASP8	CASP4	9606	9606	-	8962078	-	-	BIOGRID	ALPS2B|CAP4|Casp-8|FLICE|MACH|MCH5	ICE(rel)II|ICEREL-II|ICH-2|Mih1/TX|TX	-	-	-	Low Throughput
738605	Olah J (2011)	118144	106848	957.577	Reconstituted Complex	physical	interacts with	-	27330 (interacts with) 351	RPS6KA6	APP	9606	9606	-	21832049	-	-	BIOGRID	PP90RSK4|RSK4	AAA|ABETA|ABPP|AD1|APPI|CTFgamma|CVAP|PN-II|PN2	-	-	-	High Throughput
307678	Srinivasula SM (1996)	107291	107292	100.545	Biochemical Activity	physical	interacts with	Proteolytic Processing	841 (interacts with) 842	CASP8	CASP9	9606	9606	-	8962078	-	-	BIOGRID	ALPS2B|CAP4|Casp-8|FLICE|MACH|MCH5	APAF-3|APAF3|ICE-LAP6|MCH6|PPP1R56	-	RP11-265F14.3	-	Low Throughput
602796	Vinayagam A (2011)	118144	108123	316.861	Two-hybrid	physical	interacts with	-	27330 (interacts with) 1786	RPS6KA6	DNMT1	9606	9606	-	21900206	-	-	BIOGRID	PP90RSK4|RSK4	ADCADN|AIM|CXXC9|DNMT|HSN1E|MCMT	-	-	-	High Throughput
307662	Srinivasula SM (1996)	107291	107290	113.054	Biochemical Activity	physical	interacts with	Proteolytic Processing	841 (interacts with) 840	CASP8	CASP7	9606	9606	-	8962078	-	-	BIOGRID	ALPS2B|CAP4|Casp-8|FLICE|MACH|MCH5	CASP-7|CMH-1|ICE-LAP3|LICE2|MCH3	-	RP11-211N11.6	-	Low Throughput
283347	Stegh AH (2002)	107291	115296	187.731	Reconstituted Complex	physical	interacts with	-	841 (interacts with) 9971	CASP8	NR1H4	9606	9606	-	11733517	-	-	BIOGRID	ALPS2B|CAP4|Casp-8|FLICE|MACH|MCH5	BAR|FXR|HRR-1|HRR1|RIP14	-	-	-	Low Throughput
303984	Guo Y (2002)	107291	107106	109.307	Biochemical Activity	physical	interacts with	Proteolytic Processing	841 (interacts with) 637	CASP8	BID	9606	9606	-	11832478	-	-	BIOGRID	ALPS2B|CAP4|Casp-8|FLICE|MACH|MCH5	FP497	-	-	-	Low Throughput
244317	Gajate C (2005)	107291	106852	238.605	Co-purification	physical	interacts with	-	841 (interacts with) 356	CASP8	FASLG	9606	9606	-	15659383	Fas, tumor necrosis factor-receptor 1, and tumor necrosis factor-related apoptosis-inducing ligand receptor 2/death receptor 5 were clustered into lipid rafts in leukemic Jurkat cells following Aplidin treatment;Fas ligand (FasL) as well as downstream sig	-	BIOGRID	ALPS2B|CAP4|Casp-8|FLICE|MACH|MCH5	ALPS1B|APT1LG1|APTL|CD178|CD95-L|CD95L|FASL|TNFSF6	-	-	-	Low Throughput
1032004	Choi H (2011)	107293	114302	82.906	Reconstituted Complex	physical	interacts with	-	843 (interacts with) 8772	CASP10	FADD	9606	9606	-	20829884	-	-	BIOGRID	ALPS2|FLICE2|MCH4	MORT1	-	GIG3	-	Low Throughput
602778	Vinayagam A (2011)	118144	112168	224.388	Two-hybrid	physical	interacts with	-	27330 (interacts with) 6256	RPS6KA6	RXRA	9606	9606	-	21900206	-	-	BIOGRID	PP90RSK4|RSK4	NR2B1	-	-	-	High Throughput
854325	Lemaire C (2005)	107293	111860	570.466	Biochemical Activity	physical	interacts with	Proteolytic Processing	843 (interacts with) 5925	CASP10	RB1	9606	9606	-	15735701	figure 5.	-	BIOGRID	ALPS2|FLICE2|MCH4	OSRC|PPP1R130|RB|p105-Rb|pRb|pp110	-	RP11-174I10.1	-	Low Throughput
2536868	Jin P (2008)	109330	110391	61.2178	Protein-peptide	physical	interacts with	-	3082 (interacts with) 4233	HGF	MET	9606	9606	-	18593464	-	-	BIOGRID	DFNB39|F-TCF|HGFB|HPTA|SF	AUTS9|HGFR|RCCP2|c-Met	-	-	-	Low Throughput
2460130	Ivanov AA (2017)	109330	111182	111.183	FRET	physical	interacts with	-	3082 (interacts with) 5156	HGF	PDGFRA	9606	9606	-	28628118	Time-resolved fluorescence energy transfer (TR-FRET)	-	BIOGRID	DFNB39|F-TCF|HGFB|HPTA|SF	CD140A|PDGFR-2|PDGFR2|RHEPDGFRA	-	-	-	High Throughput
1526828	Blacque OE (2002)	107675	111286	153.299	Reconstituted Complex	physical	interacts with	-	1278 (interacts with) 5268	COL1A2	SERPINB5	9606	9606	-	11788595	Figure 3	-	BIOGRID	OI4	PI5|maspin	-	-	-	Low Throughput
2460131	Ivanov AA (2017)	109330	111831	166.36	FRET	physical	interacts with	-	3082 (interacts with) 5894	HGF	RAF1	9606	9606	-	28628118	Time-resolved fluorescence energy transfer (TR-FRET)	-	BIOGRID	DFNB39|F-TCF|HGFB|HPTA|SF	CMD1NN|CRAF|NS5|Raf-1|c-Raf	-	-	-	High Throughput
2460123	Ivanov AA (2017)	109330	107464	62.8206	FRET	physical	interacts with	-	3082 (interacts with) 1030	HGF	CDKN2B	9606	9606	-	28628118	Time-resolved fluorescence energy transfer (TR-FRET)	-	BIOGRID	DFNB39|F-TCF|HGFB|HPTA|SF	CDK4I|INK4B|MTS2|P15|TP15|p15INK4b	-	RP11-149I2.1	-	High Throughput
2460124	Ivanov AA (2017)	109330	108376	268.234	FRET	physical	interacts with	-	3082 (interacts with) 2064	HGF	ERBB2	9606	9606	-	28628118	Time-resolved fluorescence energy transfer (TR-FRET)	-	BIOGRID	DFNB39|F-TCF|HGFB|HPTA|SF	CD340|HER-2|HER-2/neu|HER2|MLN 19|NEU|NGL|TKR1	-	-	-	High Throughput
883147	Somasundaram R (1996)	107675	111181	92.3805	Far Western	physical	interacts with	-	1278 (interacts with) 5155	COL1A2	PDGFB	9606	9606	-	8900172	-	-	BIOGRID	OI4	IBGC5|PDGF-2|PDGF2|SIS|SSV|c-sis	-	LL22NC03-10C3.2	-	Low Throughput
2460119	Ivanov AA (2017)	109330	107334	101.005	FRET	physical	interacts with	-	3082 (interacts with) 894	HGF	CCND2	9606	9606	-	28628118	Time-resolved fluorescence energy transfer (TR-FRET)	-	BIOGRID	DFNB39|F-TCF|HGFB|HPTA|SF	KIAK0002|MPPH3	-	-	-	High Throughput
2460120	Ivanov AA (2017)	109330	107454	182.616	FRET	physical	interacts with	-	3082 (interacts with) 1019	HGF	CDK4	9606	9606	-	28628118	Time-resolved fluorescence energy transfer (TR-FRET)	-	BIOGRID	DFNB39|F-TCF|HGFB|HPTA|SF	CMM3|PSK-J3	-	-	-	High Throughput
2460121	Ivanov AA (2017)	109330	107456	114.045	FRET	physical	interacts with	-	3082 (interacts with) 1021	HGF	CDK6	9606	9606	-	28628118	Time-resolved fluorescence energy transfer (TR-FRET)	-	BIOGRID	DFNB39|F-TCF|HGFB|HPTA|SF	MCPH12|PLSTIRE	-	-	-	High Throughput
2455889	Ivanov AA (2017)	109330	112670	157.112	FRET	physical	interacts with	-	3082 (interacts with) 6794	HGF	STK11	9606	9606	-	28628118	Time-resolved fluorescence energy transfer (TR-FRET)	-	BIOGRID	DFNB39|F-TCF|HGFB|HPTA|SF	LKB1|PJS|hLKB1	-	-	-	High Throughput
2460118	Ivanov AA (2017)	109330	106898	215.949	FRET	physical	interacts with	-	3082 (interacts with) 405	HGF	ARNT	9606	9606	-	28628118	Time-resolved fluorescence energy transfer (TR-FRET)	-	BIOGRID	DFNB39|F-TCF|HGFB|HPTA|SF	HIF-1-beta|HIF-1beta|HIF1-beta|HIF1B|HIF1BETA|TANGO|bHLHe2	-	-	-	High Throughput
1504751	Chen TC (2014)	109330	108621	402.552	Co-localization	physical	interacts with	-	3082 (interacts with) 2335	HGF	FN1	9606	9606	-	25241761	in situ PLA	-	BIOGRID	DFNB39|F-TCF|HGFB|HPTA|SF	CIG|ED-B|FINC|FN|FNZ|GFND|GFND2|LETS|MSF	-	-	-	High Throughput
2455886	Ivanov AA (2017)	109330	108288	104.309	FRET	physical	interacts with	-	3082 (interacts with) 1969	HGF	EPHA2	9606	9606	-	28628118	Time-resolved fluorescence energy transfer (TR-FRET)	-	BIOGRID	DFNB39|F-TCF|HGFB|HPTA|SF	ARCC2|CTPA|CTPP1|CTRCT6|ECK	-	-	-	High Throughput
277729	Lyon M (1994)	109330	112285	246.273	Reconstituted Complex	physical	interacts with	-	3082 (interacts with) 6383	HGF	SDC2	9606	9606	-	8157651	-	-	BIOGRID	DFNB39|F-TCF|HGFB|HPTA|SF	CD362|HSPG|HSPG1|SYND2	-	-	-	Low Throughput
282896	Dekker RJ (1999)	111343	108447	68.7854	Co-crystal Structure	physical	interacts with	-	5327 (interacts with) 2147	PLAT	F2	9606	9606	-	10543954	-	-	BIOGRID	T-PA|TPA	PT|RPRGL2|THPH1	-	-	-	Low Throughput
303430	Orth K (1992)	111343	110215	802.971	Reconstituted Complex	physical	interacts with	-	5327 (interacts with) 4035	PLAT	LRP1	9606	9606	-	1502153	-	-	BIOGRID	T-PA|TPA	A2MR|APOER|APR|CD91|IGFBP3R|LRP|LRP1A|TGFBR5	-	-	-	Low Throughput
276848	Novokhatny V (1995)	111343	111344	150.011	Reconstituted Complex	physical	interacts with	-	5327 (interacts with) 5328	PLAT	PLAU	9606	9606	-	7721771	-	-	BIOGRID	T-PA|TPA	ATF|BDPLT5|QPD|UPA|URK|u-PA	-	RP11-417O11.1	-	Low Throughput
1446158	Hein MY (2015)	123545	111384	210.385	Affinity Capture-MS	physical	interacts with	-	81608 (interacts with) 5371	FIP1L1	PML	9606	9606	-	26496610	interaction detected by quantitative BAC-GFP interactomics (QUBIC)	-	BIOGRID	FIP1|Rhe|hFip1	MYL|PP8675|RNF71|TRIM19	-	-	-	High Throughput
738083	Olah J (2011)	123545	106848	555.257	Reconstituted Complex	physical	interacts with	-	81608 (interacts with) 351	FIP1L1	APP	9606	9606	-	21832049	-	-	BIOGRID	FIP1|Rhe|hFip1	AAA|ABETA|ABPP|AD1|APPI|CTFgamma|CVAP|PN-II|PN2	-	-	-	High Throughput
307672	Srinivasula SM (1996)	107293	107289	77.6167	Biochemical Activity	physical	interacts with	Proteolytic Processing	843 (interacts with) 839	CASP10	CASP6	9606	9606	-	8962078	-	-	BIOGRID	ALPS2|FLICE2|MCH4	MCH2	-	-	-	Low Throughput
1238583	Meffre J (2012)	109594	108757	372.601	Affinity Capture-Western	physical	interacts with	-	3362 (interacts with) 2475	HTR6	MTOR	9606	9606	-	23027611	-	-	BIOGRID	5-HT6|5-HT6R	FRAP|FRAP1|FRAP2|RAFT1|RAPT1	-	-	-	Low Throughput
1238585	Meffre J (2012)	109594	121582	326.493	Affinity Capture-Western	physical	interacts with	-	3362 (interacts with) 57521	HTR6	RPTOR	9606	9606	-	23027611	-	-	BIOGRID	5-HT6|5-HT6R	KOG1|Mip1	-	-	-	Low Throughput
307666	Srinivasula SM (1996)	107293	107287	113.737	Biochemical Activity	physical	interacts with	Proteolytic Processing	843 (interacts with) 837	CASP10	CASP4	9606	9606	-	8962078	-	-	BIOGRID	ALPS2|FLICE2|MCH4	ICE(rel)II|ICEREL-II|ICH-2|Mih1/TX|TX	-	-	-	Low Throughput
307667	Srinivasula SM (1996)	107293	107286	218.431	Biochemical Activity	physical	interacts with	Proteolytic Processing	843 (interacts with) 836	CASP10	CASP3	9606	9606	-	8962078	-	-	BIOGRID	ALPS2|FLICE2|MCH4	CPP32|CPP32B|SCA-1	-	-	-	Low Throughput
307668	Srinivasula SM (1996)	107293	107290	72.07	Biochemical Activity	physical	interacts with	Proteolytic Processing	843 (interacts with) 840	CASP10	CASP7	9606	9606	-	8962078	-	-	BIOGRID	ALPS2|FLICE2|MCH4	CASP-7|CMH-1|ICE-LAP3|LICE2|MCH3	-	RP11-211N11.6	-	Low Throughput
307671	Srinivasula SM (1996)	107293	107292	47.0362	Biochemical Activity	physical	interacts with	Proteolytic Processing	843 (interacts with) 842	CASP10	CASP9	9606	9606	-	8962078	-	-	BIOGRID	ALPS2|FLICE2|MCH4	APAF-3|APAF3|ICE-LAP6|MCH6|PPP1R56	-	RP11-265F14.3	-	Low Throughput
1238577	Meffre J (2012)	109594	116687	90.6153	Affinity Capture-MS	physical	interacts with	-	3362 (interacts with) 23049	HTR6	SMG1	9606	9606	-	23027611	-	-	BIOGRID	5-HT6|5-HT6R	61E3.4|ATX|LIP	-	-	-	High Throughput
307665	Srinivasula SM (1996)	107293	107285	67.6729	Biochemical Activity	physical	interacts with	Proteolytic Processing	843 (interacts with) 835	CASP10	CASP2	9606	9606	-	8962078	-	-	BIOGRID	ALPS2|FLICE2|MCH4	CASP-2|ICH1|NEDD-2|NEDD2|PPP1R57	-	-	-	Low Throughput
244316	Gajate C (2005)	107293	106852	132.71	Co-purification	physical	interacts with	-	843 (interacts with) 356	CASP10	FASLG	9606	9606	-	15659383	Fas, tumor necrosis factor-receptor 1, and tumor necrosis factor-related apoptosis-inducing ligand receptor 2/death receptor 5 were clustered into lipid rafts in leukemic Jurkat cells following Aplidin treatment;Fas ligand (FasL) as well as downstream sig	-	BIOGRID	ALPS2|FLICE2|MCH4	ALPS1B|APT1LG1|APTL|CD178|CD95-L|CD95L|FASL|TNFSF6	-	-	-	Low Throughput
278830	Srinivasula SM (1997)	107293	114364	51.2724	Affinity Capture-Western	physical	interacts with	-	843 (interacts with) 8837	CASP10	CFLAR	9606	9606	-	9228018	-	-	BIOGRID	ALPS2|FLICE2|MCH4	CASH|CASP8AP1|CLARP|Casper|FLAME|FLAME-1|FLAME1|FLIP|I-FLICE|MRIT|c-FLIP|c-FLIPL|c-FLIPR|c-FLIPS	-	-	-	Low Throughput
244292	Gajate C (2005)	107293	114323	72.7409	Co-purification	physical	interacts with	-	843 (interacts with) 8795	CASP10	TNFRSF10B	9606	9606	-	15659383	Fas, tumor necrosis factor-receptor 1, and tumor necrosis factor-related apoptosis-inducing ligand receptor 2/death receptor 5 were clustered into lipid rafts in leukemic Jurkat cells following Aplidin treatment;Fas ligand (FasL) as well as downstream sig	-	BIOGRID	ALPS2|FLICE2|MCH4	CD262|DR5|KILLER|KILLER/DR5|TRAIL-R2|TRAILR2|TRICK2|TRICK2A|TRICK2B|TRICKB|ZTNFR9	-	UNQ160/PRO186	-	Low Throughput
1238562	Meffre J (2012)	109594	107455	354.259	Affinity Capture-MS	physical	interacts with	-	3362 (interacts with) 1020	HTR6	CDK5	9606	9606	-	23027611	-	-	BIOGRID	5-HT6|5-HT6R	PSSALRE	-	-	-	High Throughput
1504706	Chen TC (2014)	106852	108621	901.291	Co-localization	physical	interacts with	-	356 (interacts with) 2335	FASLG	FN1	9606	9606	-	25241761	in situ PLA	-	BIOGRID	ALPS1B|APT1LG1|APTL|CD178|CD95-L|CD95L|FASL|TNFSF6	CIG|ED-B|FINC|FN|FNZ|GFND|GFND2|LETS|MSF	-	-	-	High Throughput
1238558	Meffre J (2012)	109594	106962	449.184	Affinity Capture-MS	physical	interacts with	-	3362 (interacts with) 472	HTR6	ATM	9606	9606	-	23027611	-	-	BIOGRID	5-HT6|5-HT6R	AT1|ATA|ATC|ATD|ATDC|ATE|TEL1|TELO1	-	-	-	High Throughput
1238559	Meffre J (2012)	109594	107027	224.124	Affinity Capture-MS	physical	interacts with	-	3362 (interacts with) 545	HTR6	ATR	9606	9606	-	23027611	-	-	BIOGRID	5-HT6|5-HT6R	FCTCS|FRP1|MEC1|SCKL|SCKL1	-	-	-	High Throughput
723591	Tao RH (2011)	106852	114364	135.984	Affinity Capture-Western	physical	interacts with	-	356 (interacts with) 8837	FASLG	CFLAR	9606	9606	-	21803845	-	-	BIOGRID	ALPS1B|APT1LG1|APTL|CD178|CD95-L|CD95L|FASL|TNFSF6	CASH|CASP8AP1|CLARP|Casper|FLAME|FLAME-1|FLAME1|FLIP|I-FLICE|MRIT|c-FLIP|c-FLIPL|c-FLIPR|c-FLIPS	-	-	-	Low Throughput
697628	Voss M (2009)	106852	109907	91.9352	Affinity Capture-Western	physical	interacts with	-	356 (interacts with) 3702	FASLG	ITK	9606	9606	-	19807924	-	-	BIOGRID	ALPS1B|APT1LG1|APTL|CD178|CD95-L|CD95L|FASL|TNFSF6	EMT|LPFS1|LYK|PSCTK2	-	-	-	Low Throughput
723589	Tao RH (2011)	106852	106851	111.734	Affinity Capture-Western	physical	interacts with	-	356 (interacts with) 355	FASLG	FAS	9606	9606	-	21803845	-	-	BIOGRID	ALPS1B|APT1LG1|APTL|CD178|CD95-L|CD95L|FASL|TNFSF6	ALPS1A|APO-1|APT1|CD95|FAS1|FASTM|TNFRSF6	-	RP11-399O19.7	-	Low Throughput
723590	Tao RH (2011)	106852	114302	208.536	Affinity Capture-Western	physical	interacts with	-	356 (interacts with) 8772	FASLG	FADD	9606	9606	-	21803845	-	-	BIOGRID	ALPS1B|APT1LG1|APTL|CD178|CD95-L|CD95L|FASL|TNFSF6	MORT1	-	GIG3	-	Low Throughput
697614	Voss M (2009)	106852	111308	281.797	Protein-peptide	physical	interacts with	-	356 (interacts with) 5290	FASLG	PIK3CA	9606	9606	-	19807924	-	-	BIOGRID	ALPS1B|APT1LG1|APTL|CD178|CD95-L|CD95L|FASL|TNFSF6	CLOVE|CWS5|MCAP|MCM|MCMTC|PI3K|p110-alpha	-	-	-	Low Throughput
697599	Voss M (2009)	106852	112865	148.022	Protein-peptide	physical	interacts with	-	356 (interacts with) 7006	FASLG	TEC	9606	9606	-	19807924	-	-	BIOGRID	ALPS1B|APT1LG1|APTL|CD178|CD95-L|CD95L|FASL|TNFSF6	PSCTK4	-	-	-	Low Throughput
697593	Voss M (2009)	106852	107160	204.668	Protein-peptide	physical	interacts with	-	356 (interacts with) 695	FASLG	BTK	9606	9606	-	19807924	-	-	BIOGRID	ALPS1B|APT1LG1|APTL|CD178|CD95-L|CD95L|FASL|TNFSF6	AGMX1|AT|ATK|BPK|IMD1|PSCTK1|XLA	-	RP1-164F3.2	-	Low Throughput
697596	Voss M (2009)	106852	119348	1738	Protein-peptide	physical	interacts with	-	356 (interacts with) 51168	FASLG	MYO15A	9606	9606	-	19807924	-	-	BIOGRID	ALPS1B|APT1LG1|APTL|CD178|CD95-L|CD95L|FASL|TNFSF6	DFNB3|MYO15	-	-	-	Low Throughput
697588	Voss M (2009)	106852	113357	163.757	Protein-peptide	physical	interacts with	-	356 (interacts with) 7525	FASLG	YES1	9606	9606	-	19807924	-	-	BIOGRID	ALPS1B|APT1LG1|APTL|CD178|CD95-L|CD95L|FASL|TNFSF6	HsT441|P61-YES|Yes|c-yes	-	-	-	Low Throughput
697589	Voss M (2009)	106852	112592	668.313	Protein-peptide	physical	interacts with	-	356 (interacts with) 6714	FASLG	SRC	9606	9606	-	19807924	-	-	BIOGRID	ALPS1B|APT1LG1|APTL|CD178|CD95-L|CD95L|FASL|TNFSF6	ASV|SRC1|c-SRC|p60-Src	-	RP5-823N20.1	-	Low Throughput
697586	Voss M (2009)	106852	109305	213.37	Protein-peptide	physical	interacts with	-	356 (interacts with) 3055	FASLG	HCK	9606	9606	-	19807924	-	-	BIOGRID	ALPS1B|APT1LG1|APTL|CD178|CD95-L|CD95L|FASL|TNFSF6	JTK9|p59Hck|p61Hck	-	RP5-836N17.3	-	Low Throughput
304125	Wenzel J (2001)	106852	110124	100.648	Reconstituted Complex	physical	interacts with	-	356 (interacts with) 3932	FASLG	LCK	9606	9606	-	11741599	-	-	BIOGRID	ALPS1B|APT1LG1|APTL|CD178|CD95-L|CD95L|FASL|TNFSF6	IMD22|LSK|YT16|p56lck|pp58lck	-	RP4-675E8.4	-	Low Throughput
2537126	Jin Q (2019)	116752	123331	1738	Affinity Capture-MS	physical	interacts with	-	23135 (interacts with) 80853	KDM6B	KDM7A	9606	9606	-	30224337	-	-	BIOGRID	JMJD3	JHDM1D	-	-	-	High Throughput
697582	Voss M (2009)	106852	110245	289.548	Protein-peptide	physical	interacts with	-	356 (interacts with) 4067	FASLG	LYN	9606	9606	-	19807924	-	-	BIOGRID	ALPS1B|APT1LG1|APTL|CD178|CD95-L|CD95L|FASL|TNFSF6	JTK8|p53Lyn|p56Lyn	-	-	-	Low Throughput
2537124	Jin Q (2019)	116752	107789	481.762	Affinity Capture-MS	physical	interacts with	-	23135 (interacts with) 1399	KDM6B	CRKL	9606	9606	-	30224337	-	-	BIOGRID	JMJD3	-	-	-	-	High Throughput
2382440	Xu L (2017)	114323	114302	112.748	Affinity Capture-Western	physical	interacts with	-	8795 (interacts with) 8772	TNFRSF10B	FADD	9606	9606	-	28972304	-	-	BIOGRID	CD262|DR5|KILLER|KILLER/DR5|TRAIL-R2|TRAILR2|TRICK2|TRICK2A|TRICK2B|TRICKB|ZTNFR9	MORT1	UNQ160/PRO186	GIG3	-	Low Throughput
244289	Gajate C (2005)	106852	114323	70.5003	Co-purification	physical	interacts with	-	356 (interacts with) 8795	FASLG	TNFRSF10B	9606	9606	-	15659383	Fas, tumor necrosis factor-receptor 1, and tumor necrosis factor-related apoptosis-inducing ligand receptor 2/death receptor 5 were clustered into lipid rafts in leukemic Jurkat cells following Aplidin treatment;Fas ligand (FasL) as well as downstream sig	-	BIOGRID	ALPS1B|APT1LG1|APTL|CD178|CD95-L|CD95L|FASL|TNFSF6	CD262|DR5|KILLER|KILLER/DR5|TRAIL-R2|TRAILR2|TRICK2|TRICK2A|TRICK2B|TRICKB|ZTNFR9	-	UNQ160/PRO186	-	Low Throughput
2264569	Huttlin EL (2017)	114323	108551	217.74	Affinity Capture-MS	physical	interacts with	-	8795 (interacts with) 2260	TNFRSF10B	FGFR1	9606	9606	-	28514442	Quantitative scores are a modified CompPASS score derived from Sowa et al., Cell, 2009 (PMID 19615732). The cut-off threshold is > 0.75.|Re-analysis of the data from the first paper, The BioPlex Network: A Systematic Exploration of the Human Interactome, PUBMED:26186194	0.845719	BIOGRID	CD262|DR5|KILLER|KILLER/DR5|TRAIL-R2|TRAILR2|TRICK2|TRICK2A|TRICK2B|TRICKB|ZTNFR9	BFGFR|CD331|CEK|FGFBR|FGFR-1|FLG|FLT-2|FLT2|HBGFR|HH2|HRTFDS|KAL2|N-SAM|OGD|bFGF-R-1	UNQ160/PRO186	-	-	High Throughput
2574980	Kalogeropulou AF (2018)	125700	115330	282.995	Affinity Capture-Western	physical	interacts with	-	120892 (interacts with) 10013	LRRK2	HDAC6	9606	9606	-	29519959	-	-	BIOGRID	AURA17|DARDARIN|PARK8|RIPK7|ROCO2	CPBHM|HD6|PPP1R90	-	JM21	-	Low Throughput
2248646	Huttlin EL (2017)	114323	107234	184.294	Affinity Capture-MS	physical	interacts with	-	8795 (interacts with) 780	TNFRSF10B	DDR1	9606	9606	-	28514442	Quantitative scores are a modified CompPASS score derived from Sowa et al., Cell, 2009 (PMID 19615732). The cut-off threshold is > 0.75.	0.965955	BIOGRID	CD262|DR5|KILLER|KILLER/DR5|TRAIL-R2|TRAILR2|TRICK2|TRICK2A|TRICK2B|TRICKB|ZTNFR9	CAK|CD167|DDR|EDDR1|HGK2|MCK10|NEP|NTRK4|PTK3|PTK3A|RTK6|TRKE	UNQ160/PRO186	DAAP-278B20.1	-	High Throughput
2537109	Jin Q (2019)	116752	115987	235.073	Affinity Capture-MS	physical	interacts with	-	23135 (interacts with) 10768	KDM6B	AHCYL1	9606	9606	-	30224337	-	-	BIOGRID	JMJD3	DCAL|IRBIT|PPP1R78|PRO0233|XPVKONA	-	-	-	High Throughput
2574975	Kalogeropulou AF (2018)	125700	109535	197.858	Affinity Capture-Western	physical	interacts with	-	120892 (interacts with) 3303	LRRK2	HSPA1A	9606	9606	-	29519959	-	-	BIOGRID	AURA17|DARDARIN|PARK8|RIPK7|ROCO2	HEL-S-103|HSP70-1|HSP70-1A|HSP70I|HSP72|HSPA1	-	DAQB-147D11.1	-	Low Throughput
2574972	Kalogeropulou AF (2018)	125700	109547	334.107	Affinity Capture-Western	physical	interacts with	-	120892 (interacts with) 3315	LRRK2	HSPB1	9606	9606	-	29519959	-	-	BIOGRID	AURA17|DARDARIN|PARK8|RIPK7|ROCO2	CMT2F|HEL-S-102|HMN2B|HS.76067|HSP27|HSP28|Hsp25|SRP27	-	-	-	Low Throughput
814303	Gonzalvez F (2012)	114323	114364	85.0411	Affinity Capture-Western	physical	interacts with	-	8795 (interacts with) 8837	TNFRSF10B	CFLAR	9606	9606	-	23142077	-	-	BIOGRID	CD262|DR5|KILLER|KILLER/DR5|TRAIL-R2|TRAILR2|TRICK2|TRICK2A|TRICK2B|TRICKB|ZTNFR9	CASH|CASP8AP1|CLARP|Casper|FLAME|FLAME-1|FLAME1|FLIP|I-FLICE|MRIT|c-FLIP|c-FLIPL|c-FLIPR|c-FLIPS	UNQ160/PRO186	-	-	Low Throughput
2518752	Tomkins JE (2018)	125700	108407	201.677	Reconstituted Complex	physical	interacts with	-	120892 (interacts with) 2104	LRRK2	ESRRG	9606	9606	-	29513927	Significant hits in the protein microarray had a Z-score threshold of Z > 3.	-	BIOGRID	AURA17|DARDARIN|PARK8|RIPK7|ROCO2	ERR3|ERRgamma|NR3B3	-	-	-	High Throughput
2518744	Tomkins JE (2018)	125700	120819	203.27	Reconstituted Complex	physical	interacts with	-	120892 (interacts with) 55693	LRRK2	KDM4D	9606	9606	-	29513927	Significant hits in the protein microarray had a Z-score threshold of Z > 3.	-	BIOGRID	AURA17|DARDARIN|PARK8|RIPK7|ROCO2	JMJD2D	-	-	-	High Throughput
2518743	Tomkins JE (2018)	125700	113367	190.923	Reconstituted Complex	physical	interacts with	-	120892 (interacts with) 7535	LRRK2	ZAP70	9606	9606	-	29513927	Significant hits in the protein microarray had a Z-score threshold of Z > 3.	-	BIOGRID	AURA17|DARDARIN|PARK8|RIPK7|ROCO2	SRK|STCD|STD|TZK|ZAP-70	-	-	-	High Throughput
2537087	Jin Q (2019)	116752	109205	403.776	Affinity Capture-MS	physical	interacts with	-	23135 (interacts with) 2950	KDM6B	GSTP1	9606	9606	-	30224337	-	-	BIOGRID	JMJD3	DFN7|FAEES3|GST3|GSTP|HEL-S-22|PI	-	-	-	High Throughput
2518738	Tomkins JE (2018)	125700	112113	207.415	Reconstituted Complex	physical	interacts with	-	120892 (interacts with) 6199	LRRK2	RPS6KB2	9606	9606	-	29513927	Significant hits in the protein microarray had a Z-score threshold of Z > 3.	-	BIOGRID	AURA17|DARDARIN|PARK8|RIPK7|ROCO2	KLS|P70-beta|P70-beta-1|P70-beta-2|S6K-beta2|S6K2|SRK|STK14B|p70(S6K)-beta|p70S6Kb	-	-	-	High Throughput
244258	Jiang T (2004)	108356	113010	1644.33	Reconstituted Complex	physical	interacts with	-	2042 (interacts with) 7157	EPHA3	TP53	9606	9606	-	15355990	Etk is physically associated with p53 through its Src homology 3 domain and the proline-rich domain of p53. Induction of p53 expression by DNA damage inhibits Etk activity;interacts with p53 in the cytoplasm and that such interaction leads to bidirectiona	-	BIOGRID	EK4|ETK|ETK1|HEK|HEK4|TYRO4	BCC7|LFS1|P53|TRP53	-	-	-	Low Throughput
2518728	Tomkins JE (2018)	125700	108853	199.119	Reconstituted Complex	physical	interacts with	-	120892 (interacts with) 2580	LRRK2	GAK	9606	9606	-	29513927	Significant hits in the protein microarray had a Z-score threshold of Z > 3.	-	BIOGRID	AURA17|DARDARIN|PARK8|RIPK7|ROCO2	DNAJ26|DNAJC26	-	-	-	High Throughput
2537071	Jin Q (2019)	116752	112654	322.507	Affinity Capture-MS	physical	interacts with	-	23135 (interacts with) 6777	KDM6B	STAT5B	9606	9606	-	30224337	-	-	BIOGRID	JMJD3	STAT5	-	-	-	High Throughput
2518722	Tomkins JE (2018)	125700	114023	168.943	Reconstituted Complex	physical	interacts with	-	120892 (interacts with) 8445	LRRK2	DYRK2	9606	9606	-	29513927	Significant hits in the protein microarray had a Z-score threshold of Z > 3.	-	BIOGRID	AURA17|DARDARIN|PARK8|RIPK7|ROCO2	-	-	-	-	High Throughput
2537069	Jin Q (2019)	116752	109938	326.43	Affinity Capture-MS	physical	interacts with	-	23135 (interacts with) 3735	KDM6B	KARS	9606	9606	-	30224337	-	-	BIOGRID	JMJD3	CMTRIB|DFNB89|KARS1|KARS2|KRS	-	-	-	High Throughput
545325	Dahle O (2010)	116752	110263	982.35	Affinity Capture-Western	physical	interacts with	-	23135 (interacts with) 4088	KDM6B	SMAD3	9606	9606	-	20571128	-	-	BIOGRID	JMJD3	HSPC193|HsT17436|JV15-2|LDS1C|LDS3|MADH3	-	-	-	Low Throughput
535012	Akizu N (2010)	116752	110261	377.468	Affinity Capture-Western	physical	interacts with	-	23135 (interacts with) 4086	KDM6B	SMAD1	9606	9606	-	20667911	-	-	BIOGRID	JMJD3	BSP-1|BSP1|JV4-1|JV41|MADH1|MADR1	-	-	-	Low Throughput
545324	Dahle O (2010)	116752	110262	531.234	Affinity Capture-Western	physical	interacts with	-	23135 (interacts with) 4087	KDM6B	SMAD2	9606	9606	-	20571128	-	-	BIOGRID	JMJD3	JV18|JV18-1|MADH2|MADR2|hMAD-2|hSMAD2	-	-	-	Low Throughput
2518702	Tomkins JE (2018)	125700	114646	200.09	Reconstituted Complex	physical	interacts with	-	120892 (interacts with) 9212	LRRK2	AURKB	9606	9606	-	29513927	Significant hits in the protein microarray had a Z-score threshold of Z > 3.	-	BIOGRID	AURA17|DARDARIN|PARK8|RIPK7|ROCO2	AIK2|AIM-1|AIM1|ARK2|AurB|IPL1|PPP1R48|STK12|STK5|aurkb-sv1|aurkb-sv2	-	-	-	High Throughput
2518699	Tomkins JE (2018)	125700	115987	297.651	Reconstituted Complex	physical	interacts with	-	120892 (interacts with) 10768	LRRK2	AHCYL1	9606	9606	-	29513927	Significant hits in the protein microarray had a Z-score threshold of Z > 3.	-	BIOGRID	AURA17|DARDARIN|PARK8|RIPK7|ROCO2	DCAL|IRBIT|PPP1R78|PRO0233|XPVKONA	-	-	-	High Throughput
2513140	Beilina A (2014)	125700	110315	134.966	Reconstituted Complex	physical	interacts with	-	120892 (interacts with) 4145	LRRK2	MATK	9606	9606	-	24510904	biotinylated GST fusions of various forms of LRRK2 (the bait), sometimes with GDP or GMPPcP, were used to probe protein arrays to identify interaction hits	-	BIOGRID	AURA17|DARDARIN|PARK8|RIPK7|ROCO2	CHK|CTK|HHYLTK|HYL|HYLTK|Lsk	-	-	-	High Throughput
2532830	Koizume S (2015)	112550	109928	168.901	Co-localization	physical	interacts with	-	6667 (interacts with) 3725	SP1	JUN	9606	9606	-	25879517	ChIP	-	BIOGRID	-	AP-1|AP1|c-Jun	-	-	-	Low Throughput
2534751	Pore N (2004)	112550	106710	239.13	Biochemical Activity	physical	interacts with	Phosphorylation	6667 (interacts with) 207	SP1	AKT1	9606	9606	-	15342781	EMSA	-	BIOGRID	-	AKT|CWS6|PKB|PKB-ALPHA|PRKBA|RAC|RAC-ALPHA	-	-	-	Low Throughput
2513121	Beilina A (2014)	125700	115670	96.4249	Reconstituted Complex	physical	interacts with	-	120892 (interacts with) 10398	LRRK2	MYL9	9606	9606	-	24510904	biotinylated GST fusions of various forms of LRRK2 (the bait), sometimes with GDP or GMPPcP, were used to probe protein arrays to identify interaction hits	-	BIOGRID	AURA17|DARDARIN|PARK8|RIPK7|ROCO2	LC20|MLC-2C|MLC2|MRLC1|MYRL2	-	RP5-977B1.9	-	High Throughput
2548720	Nie E (2016)	112550	113010	445.327	Affinity Capture-Western	physical	interacts with	-	6667 (interacts with) 7157	SP1	TP53	9606	9606	-	28000777	-	-	BIOGRID	-	BCC7|LFS1|P53|TRP53	-	-	-	Low Throughput
2518488	Mir R (2018)	112550	109187	135.006	Affinity Capture-Western	physical	interacts with	-	6667 (interacts with) 2932	SP1	GSK3B	9606	9606	-	30181396	-	-	BIOGRID	-	-	-	-	-	Low Throughput
2532474	Koutsodontis G (2005)	112550	113014	79.9181	Reconstituted Complex	physical	interacts with	-	6667 (interacts with) 7161	SP1	TP73	9606	9606	-	15790310	-	-	BIOGRID	-	P73	-	-	-	Low Throughput
1055901	Kim GS (2008)	106695	111464	452.301	Affinity Capture-Western	physical	interacts with	-	190 (interacts with) 5468	NR0B1	PPARG	9606	9606	-	18381063	-	-	BIOGRID	AHC|AHCH|AHX|DAX-1|DAX1|DSS|GTD|HHG|NROB1|SRXY2	CIMT1|GLM1|NR1C3|PPARG1|PPARG2|PPARgamma	-	-	-	Low Throughput
482476	Agoulnik IU (2003)	106695	111260	168.546	Affinity Capture-Western	physical	interacts with	-	190 (interacts with) 5241	NR0B1	PGR	9606	9606	-	12771131	-	-	BIOGRID	AHC|AHCH|AHX|DAX-1|DAX1|DSS|GTD|HHG|NROB1|SRXY2	NR3C3|PR	-	-	-	Low Throughput
2518487	Mir R (2018)	112550	107880	204.182	Reconstituted Complex	physical	interacts with	-	6667 (interacts with) 1499	SP1	CTNNB1	9606	9606	-	30181396	-	-	BIOGRID	-	CTNNB|MRD19|armadillo	-	OK/SW-cl.35	-	Low Throughput
569829	Albers M (2005)	106695	108405	72.5044	Two-hybrid	physical	interacts with	-	190 (interacts with) 2101	NR0B1	ESRRA	9606	9606	-	15604093	-	-	BIOGRID	AHC|AHCH|AHX|DAX-1|DAX1|DSS|GTD|HHG|NROB1|SRXY2	ERR1|ERRa|ERRalpha|ESRL1|NR3B1	-	-	-	Low Throughput
1510002	Chen C (2012)	112550	112878	111.908	Affinity Capture-Western	physical	interacts with	-	6667 (interacts with) 7020	SP1	TFAP2A	9606	9606	-	22182699	-	-	BIOGRID	-	AP-2|AP-2alpha|AP2TF|BOFS|TFAP2	-	RP1-290I10.1	-	Low Throughput
1518131	Xu Y (2008)	112550	110929	215.131	Two-hybrid	physical	interacts with	-	6667 (interacts with) 4869	SP1	NPM1	9606	9606	-	19074833	-	-	BIOGRID	-	B23|NPM	-	-	-	Low Throughput
2380402	Lin A (2016)	125700	109338	483.283	Biochemical Activity	physical	interacts with	Phosphorylation	120892 (interacts with) 3091	LRRK2	HIF1A	9606	9606	-	26751287	-	-	BIOGRID	AURA17|DARDARIN|PARK8|RIPK7|ROCO2	HIF-1A|HIF-1alpha|HIF1|HIF1-ALPHA|MOP1|PASD8|bHLHe78	-	-	-	Low Throughput
1054001	Zurlo D (2014)	112550	111464	141.214	Affinity Capture-Western	physical	interacts with	-	6667 (interacts with) 5468	SP1	PPARG	9606	9606	-	24735796	-	-	BIOGRID	-	CIMT1|GLM1|NR1C3|PPARG1|PPARG2|PPARgamma	-	-	-	Low Throughput
482472	Agoulnik IU (2003)	106695	106862	450.272	Affinity Capture-Western	physical	interacts with	-	190 (interacts with) 367	NR0B1	AR	9606	9606	-	12771131	-	-	BIOGRID	AHC|AHCH|AHX|DAX-1|DAX1|DSS|GTD|HHG|NROB1|SRXY2	AIS|DHTR|HUMARA|HYSP1|KD|NR3C4|SBMA|SMAX1|TFM	-	RP11-383C12.1	-	Low Throughput
1050645	Yang HC (2014)	112550	111317	226.382	Affinity Capture-Western	physical	interacts with	-	6667 (interacts with) 5300	SP1	PIN1	9606	9606	-	25398907	figure 1.	-	BIOGRID	-	DOD|UBL5	-	-	-	Low Throughput
2205111	Ho DH (2015)	125700	113010	772.604	Affinity Capture-Western	physical	interacts with	-	120892 (interacts with) 7157	LRRK2	TP53	9606	9606	-	26384650	-	-	BIOGRID	AURA17|DARDARIN|PARK8|RIPK7|ROCO2	BCC7|LFS1|P53|TRP53	-	-	-	Low Throughput
1050647	Yang HC (2014)	112550	107420	126.142	Affinity Capture-Western	physical	interacts with	-	6667 (interacts with) 983	SP1	CDK1	9606	9606	-	25398907	figure 1.	-	BIOGRID	-	CDC2|CDC28A|P34CDC2	-	-	-	Low Throughput
1274904	Daechsel JC (2007)	125700	109545	222.006	Affinity Capture-MS	physical	interacts with	-	120892 (interacts with) 3313	LRRK2	HSPA9	9606	9606	-	17400507	-	-	BIOGRID	AURA17|DARDARIN|PARK8|RIPK7|ROCO2	CRP40|CSA|GRP-75|GRP75|HEL-S-124m|HSPA9B|MOT|MOT2|MTHSP75|PBP74	-	-	-	Low Throughput
858127	Koshiji M (2005)	112550	109338	272.954	Co-localization	physical	interacts with	-	6667 (interacts with) 3091	SP1	HIF1A	9606	9606	-	15780936	colocalization to the MSH2 promoter in hypoxia	-	BIOGRID	-	HIF-1A|HIF-1alpha|HIF1|HIF1-ALPHA|MOP1|PASD8|bHLHe78	-	-	-	Low Throughput
905198	Gibson LL (2005)	112550	108403	191.061	Reconstituted Complex	physical	interacts with	-	6667 (interacts with) 2099	SP1	ESR1	9606	9606	-	15705965	EMSA|Protein Complex	-	BIOGRID	-	ER|ESR|ESRA|ESTRR|Era|NR3A1	-	RP1-130E4.1	-	Low Throughput
1174635	Charan RA (2014)	125700	107057	138.669	Affinity Capture-Western	physical	interacts with	-	120892 (interacts with) 581	LRRK2	BAX	9606	9606	-	24991765	-	-	BIOGRID	AURA17|DARDARIN|PARK8|RIPK7|ROCO2	BCL2L4	-	-	-	Low Throughput
854582	Sanchez-Elsner T (2002)	112550	110263	218.251	Affinity Capture-Luminescence	physical	interacts with	-	6667 (interacts with) 4088	SP1	SMAD3	9606	9606	-	12228247	-	-	BIOGRID	-	HSPC193|HsT17436|JV15-2|LDS1C|LDS3|MADH3	-	-	-	Low Throughput
723759	Wang SA (2009)	112550	111585	200.618	Affinity Capture-Western	physical	interacts with	-	6667 (interacts with) 5599	SP1	MAPK8	9606	9606	-	19245816	-	-	BIOGRID	-	JNK|JNK-46|JNK1|JNK1A2|JNK21B1/2|PRKM8|SAPK1|SAPK1c	-	-	-	Low Throughput
918492	Ohta E (2011)	125700	106710	405.753	Reconstituted Complex	physical	interacts with	-	120892 (interacts with) 207	LRRK2	AKT1	9606	9606	-	21658387	figure 1.	-	BIOGRID	AURA17|DARDARIN|PARK8|RIPK7|ROCO2	AKT|CWS6|PKB|PKB-ALPHA|PRKBA|RAC|RAC-ALPHA	-	-	-	Low Throughput
835947	Saville B (2000)	112550	108404	813.503	Reconstituted Complex	physical	interacts with	-	6667 (interacts with) 2100	SP1	ESR2	9606	9606	-	10681512	-	-	BIOGRID	-	ER-BETA|ESR-BETA|ESRB|ESTRB|Erb|NR3A2	-	-	-	Low Throughput
676949	Wong CY (2011)	112550	109315	213.655	Affinity Capture-Western	physical	interacts with	-	6667 (interacts with) 3065	SP1	HDAC1	9606	9606	-	21636851	figure 7D.	-	BIOGRID	-	GON-10|HD1|RPD3|RPD3L1	-	RP4-811H24.2	-	Low Throughput
2533400	Barbieri MA (2003)	114972	108551	112.846	Affinity Capture-Western	physical	interacts with	-	9610 (interacts with) 2260	RIN1	FGFR1	9606	9606	-	12783862	-	-	BIOGRID	-	BFGFR|CD331|CEK|FGFBR|FGFR-1|FLG|FLT-2|FLT2|HBGFR|HH2|HRTFDS|KAL2|N-SAM|OGD|bFGF-R-1	-	-	-	Low Throughput
723283	Klein CL (2009)	125700	107982	126.683	Affinity Capture-Western	physical	interacts with	-	120892 (interacts with) 1612	LRRK2	DAPK1	9606	9606	-	19712061	figure 3.	-	BIOGRID	AURA17|DARDARIN|PARK8|RIPK7|ROCO2	DAPK	-	-	-	Low Throughput
672496	Chuang JY (2012)	112550	138656	640.029	Affinity Capture-MS	physical	interacts with	-	6667 (interacts with) 445582	SP1	POTEE	9606	9606	-	22266860	table S1.	-	BIOGRID	-	A26C1|A26C1A|CT104.2|POTE-2|POTE2|POTE2gamma	-	-	-	High Throughput
723233	Imai Y (2008)	125700	108293	151.524	Biochemical Activity	physical	interacts with	Phosphorylation	120892 (interacts with) 1978	LRRK2	EIF4EBP1	9606	9606	-	18701920	figure 3.	-	BIOGRID	AURA17|DARDARIN|PARK8|RIPK7|ROCO2	4E-BP1|4EBP1|BP-1|PHAS-I	-	-	-	Low Throughput
2533399	Barbieri MA (2003)	114972	111185	86.7742	Affinity Capture-Western	physical	interacts with	-	9610 (interacts with) 5159	RIN1	PDGFRB	9606	9606	-	12783862	-	-	BIOGRID	-	CD140B|IBGC4|IMF1|JTK12|PDGFR|PDGFR-1|PDGFR1	-	-	-	Low Throughput
723222	Ho CC (2009)	125700	114302	350.564	Affinity Capture-Western	physical	interacts with	-	120892 (interacts with) 8772	LRRK2	FADD	9606	9606	-	19176810	figure 1.|figure 3.	-	BIOGRID	AURA17|DARDARIN|PARK8|RIPK7|ROCO2	MORT1	-	GIG3	-	Low Throughput
672487	Chuang JY (2012)	112550	110727	417.872	Affinity Capture-MS	physical	interacts with	-	6667 (interacts with) 4643	SP1	MYO1E	9606	9606	-	22266860	table S1.	-	BIOGRID	-	FSGS6|HuncM-IC|MYO1C	-	-	-	High Throughput
672488	Chuang JY (2012)	112550	110730	196.038	Affinity Capture-MS	physical	interacts with	-	6667 (interacts with) 4646	SP1	MYO6	9606	9606	-	22266860	table S1.	-	BIOGRID	-	DFNA22|DFNB37	-	RP3-472A9.1	-	High Throughput
723224	Ho CC (2009)	125700	107291	222.838	Affinity Capture-Western	physical	interacts with	-	120892 (interacts with) 841	LRRK2	CASP8	9606	9606	-	19176810	figure 3.	-	BIOGRID	AURA17|DARDARIN|PARK8|RIPK7|ROCO2	ALPS2B|CAP4|Casp-8|FLICE|MACH|MCH5	-	-	-	Low Throughput
672490	Chuang JY (2012)	112550	115670	222.788	Affinity Capture-MS	physical	interacts with	-	6667 (interacts with) 10398	SP1	MYL9	9606	9606	-	22266860	table S1.	-	BIOGRID	-	LC20|MLC-2C|MLC2|MRLC1|MYRL2	-	RP5-977B1.9	-	High Throughput
2267919	Huttlin EL (2017)	114972	106543	228.643	Affinity Capture-MS	physical	interacts with	-	9610 (interacts with) 25	RIN1	ABL1	9606	9606	-	28514442	Quantitative scores are a modified CompPASS score derived from Sowa et al., Cell, 2009 (PMID 19615732). The cut-off threshold is > 0.75.	0.808556	BIOGRID	-	ABL|JTK7|bcr/abl|c-ABL|c-ABL1|p150|v-abl	-	RP11-83J21.1	-	High Throughput
723151	Meixner A (2011)	125700	106575	253.525	Reconstituted Complex	physical	interacts with	-	120892 (interacts with) 60	LRRK2	ACTB	9606	9606	-	20876399	figure 4.	-	BIOGRID	AURA17|DARDARIN|PARK8|RIPK7|ROCO2	BRWS1|PS1TP5BP1	-	-	-	Low Throughput
672483	Chuang JY (2012)	112550	110714	532.354	Affinity Capture-MS	physical	interacts with	-	6667 (interacts with) 4629	SP1	MYH11	9606	9606	-	22266860	table S1.	-	BIOGRID	-	AAT4|FAA4|SMHC|SMMHC	-	-	-	High Throughput
723150	Meixner A (2011)	125700	110726	129.479	Affinity Capture-Western	physical	interacts with	-	120892 (interacts with) 4642	LRRK2	MYO1D	9606	9606	-	20876399	figure 2.	-	BIOGRID	AURA17|DARDARIN|PARK8|RIPK7|ROCO2	PPP1R108|myr4	-	-	-	Low Throughput
926321	Kristensen AR (2012)	109323	113135	1738	Co-fractionation	physical	interacts with	-	3074 (interacts with) 7284	HEXB	TUFM	9606	9606	-	22863883	-	-	BIOGRID	ENC-1AS|HEL-248	COXPD4|EF-TuMT|EFTU|P43	HCC7	-	-	High Throughput
672486	Chuang JY (2012)	112550	110725	108.59	Affinity Capture-MS	physical	interacts with	-	6667 (interacts with) 4641	SP1	MYO1C	9606	9606	-	22266860	table S1.	-	BIOGRID	-	MMI-beta|MMIb|NMI|myr2	-	-	-	High Throughput
672478	Chuang JY (2012)	112550	110474	192.675	Affinity Capture-MS	physical	interacts with	-	6667 (interacts with) 4331	SP1	MNAT1	9606	9606	-	22266860	table S1.	-	BIOGRID	-	CAP35|MAT1|RNF66|TFB3	-	-	-	High Throughput
723149	Meixner A (2011)	125700	115403	182.684	Affinity Capture-Western	physical	interacts with	-	120892 (interacts with) 10096	LRRK2	ACTR3	9606	9606	-	20876399	figure 2.	-	BIOGRID	AURA17|DARDARIN|PARK8|RIPK7|ROCO2	ARP3	-	-	-	Low Throughput
672480	Chuang JY (2012)	112550	121681	781.637	Affinity Capture-MS	physical	interacts with	-	6667 (interacts with) 57644	SP1	MYH7B	9606	9606	-	22266860	table S1.	-	BIOGRID	-	MHC14|MYH14	-	RP4-756N5.1	-	High Throughput
2223829	Huttlin EL (2017)	114972	106545	51.3609	Affinity Capture-MS	physical	interacts with	-	9610 (interacts with) 27	RIN1	ABL2	9606	9606	-	28514442	Quantitative scores are a modified CompPASS score derived from Sowa et al., Cell, 2009 (PMID 19615732). The cut-off threshold is > 0.75.	0.999982	BIOGRID	-	ABLL|ARG	-	RP11-177A2.3	-	High Throughput
672481	Chuang JY (2012)	112550	110712	233.068	Affinity Capture-MS	physical	interacts with	-	6667 (interacts with) 4627	SP1	MYH9	9606	9606	-	22266860	table S1.	-	BIOGRID	-	BDPLT6|DFNA17|EPSTS|FTNS|MHA|NMHC-II-A|NMMHC-IIA|NMMHCA	-	RP1-68O2.1	-	High Throughput
672475	Chuang JY (2012)	112550	109545	139.461	Affinity Capture-MS	physical	interacts with	-	6667 (interacts with) 3313	SP1	HSPA9	9606	9606	-	22266860	table S1.	-	BIOGRID	-	CRP40|CSA|GRP-75|GRP75|HEL-S-124m|HSPA9B|MOT|MOT2|MTHSP75|PBP74	-	-	-	High Throughput
723126	Meixner A (2011)	125700	110725	138.271	Affinity Capture-MS	physical	interacts with	-	120892 (interacts with) 4641	LRRK2	MYO1C	9606	9606	-	20876399	table 1.	-	BIOGRID	AURA17|DARDARIN|PARK8|RIPK7|ROCO2	MMI-beta|MMIb|NMI|myr2	-	-	-	High Throughput
672462	Chuang JY (2012)	112550	131362	239.854	Affinity Capture-MS	physical	interacts with	-	6667 (interacts with) 345651	SP1	ACTBL2	9606	9606	-	22266860	table S1.	-	BIOGRID	-	ACT	-	-	-	High Throughput
672463	Chuang JY (2012)	112550	106585	251.08	Affinity Capture-MS	physical	interacts with	-	6667 (interacts with) 70	SP1	ACTC1	9606	9606	-	22266860	table S1.	-	BIOGRID	-	ACTC|ASD5|CMD1R|CMH11|LVNC4	-	-	-	High Throughput
723128	Meixner A (2011)	125700	110638	1738	Affinity Capture-MS	physical	interacts with	-	120892 (interacts with) 4542	LRRK2	MYO1F	9606	9606	-	20876399	table 1.	-	BIOGRID	AURA17|DARDARIN|PARK8|RIPK7|ROCO2	-	-	-	-	High Throughput
303363	Deguchi H (1997)	108447	108452	436.501	Reconstituted Complex	physical	interacts with	-	2147 (interacts with) 2153	F2	F5	9606	9606	-	9032460	-	-	BIOGRID	PT|RPRGL2|THPH1	FVL|PCCF|RPRGL1|THPH2	-	-	-	Low Throughput
656090	Proietti CJ (2011)	112550	112651	230.84	Affinity Capture-Western	physical	interacts with	-	6667 (interacts with) 6774	SP1	STAT3	9606	9606	-	21184768	-	-	BIOGRID	-	ADMIO|APRF|HIES	-	-	-	Low Throughput
656091	Proietti CJ (2011)	112550	111260	120.619	Affinity Capture-Western	physical	interacts with	-	6667 (interacts with) 5241	SP1	PGR	9606	9606	-	21184768	-	-	BIOGRID	-	NR3C3|PR	-	-	-	Low Throughput
259156	Dekker RJ (2003)	108447	111091	118.142	Reconstituted Complex	physical	interacts with	-	2147 (interacts with) 5054	F2	SERPINE1	9606	9606	-	12709053	-	-	BIOGRID	PT|RPRGL2|THPH1	PAI|PAI-1|PAI1|PLANH1	-	-	-	Low Throughput
277958	Baglin TP (2002)	108447	109303	187.622	Co-crystal Structure	physical	interacts with	-	2147 (interacts with) 3053	F2	SERPIND1	9606	9606	-	12169660	-	-	BIOGRID	PT|RPRGL2|THPH1	D22S673|HC2|HCF2|HCII|HLS2|LS2|THPH10	-	-	-	Low Throughput
611997	Barrasa JI (2011)	112550	110262	181.27	Affinity Capture-Western	physical	interacts with	-	6667 (interacts with) 4087	SP1	SMAD2	9606	9606	-	22227581	-	-	BIOGRID	-	JV18|JV18-1|MADH2|MADR2|hMAD-2|hSMAD2	-	-	-	Low Throughput
604494	Opitz OG (2000)	112550	111860	100.31	Affinity Capture-Western	physical	interacts with	-	6667 (interacts with) 5925	SP1	RB1	9606	9606	-	10850422	-	-	BIOGRID	-	OSRC|PPP1R130|RB|p105-Rb|pRb|pp110	-	RP11-174I10.1	-	Low Throughput
604495	Opitz OG (2000)	112550	107067	94.9531	Affinity Capture-Western	physical	interacts with	-	6667 (interacts with) 595	SP1	CCND1	9606	9606	-	10850422	-	-	BIOGRID	-	BCL1|D11S287E|PRAD1|U21B31	-	-	-	Low Throughput
723108	Meixner A (2011)	125700	115404	174.169	Affinity Capture-MS	physical	interacts with	-	120892 (interacts with) 10097	LRRK2	ACTR2	9606	9606	-	20876399	table 1.	-	BIOGRID	AURA17|DARDARIN|PARK8|RIPK7|ROCO2	ARP2	-	-	-	High Throughput
558823	Benjamin JT (2010)	112550	111902	177.968	Affinity Capture-Western	physical	interacts with	-	6667 (interacts with) 5970	SP1	RELA	9606	9606	-	20861353	-	-	BIOGRID	-	NFKB3|p65	-	-	-	Low Throughput
565185	Tsai PF (2011)	112550	109316	101.491	Affinity Capture-Western	physical	interacts with	-	6667 (interacts with) 3066	SP1	HDAC2	9606	9606	-	21159880	based on EMSA	-	BIOGRID	-	HD2|RPD3|YAF1	-	-	-	Low Throughput
723103	Meixner A (2011)	125700	131362	180.11	Affinity Capture-MS	physical	interacts with	-	120892 (interacts with) 345651	LRRK2	ACTBL2	9606	9606	-	20876399	table 1.	-	BIOGRID	AURA17|DARDARIN|PARK8|RIPK7|ROCO2	ACT	-	-	-	High Throughput
519697	Chen PH (2008)	112550	106862	135.203	Affinity Capture-Western	physical	interacts with	-	6667 (interacts with) 367	SP1	AR	9606	9606	-	17984071	-	-	BIOGRID	-	AIS|DHTR|HUMARA|HYSP1|KD|NR3C4|SBMA|SMAX1|TFM	-	RP11-383C12.1	-	Low Throughput
723106	Meixner A (2011)	125700	106574	150.239	Affinity Capture-MS	physical	interacts with	-	120892 (interacts with) 59	LRRK2	ACTA2	9606	9606	-	20876399	table 1.	-	BIOGRID	AURA17|DARDARIN|PARK8|RIPK7|ROCO2	AAT6|ACTSA|MYMY5	-	GIG46	-	High Throughput
519802	Zaniolo K (2007)	112550	106652	94.6529	Affinity Capture-Western	physical	interacts with	-	6667 (interacts with) 142	SP1	PARP1	9606	9606	-	17961220	-	-	BIOGRID	-	ADPRT|ADPRT 1|ADPRT1|ARTD1|PARP|PARP-1|PPOL|pADPRT-1	-	RP11-125A15.2	-	Low Throughput
530696	Chuang YS (2011)	112550	111384	119.663	Co-localization	physical	interacts with	-	6667 (interacts with) 5371	SP1	PML	9606	9606	-	21360626	ChIP	-	BIOGRID	-	MYL|PP8675|RNF71|TRIM19	-	-	-	Low Throughput
506252	Cheng YH (2008)	112550	111849	190.002	Affinity Capture-Western	physical	interacts with	-	6667 (interacts with) 5914	SP1	RARA	9606	9606	-	18270252	-	-	BIOGRID	-	NR1B1|RAR	-	-	-	Low Throughput
506253	Cheng YH (2008)	112550	112168	199.273	Affinity Capture-Western	physical	interacts with	-	6667 (interacts with) 6256	SP1	RXRA	9606	9606	-	18270252	-	-	BIOGRID	-	NR2B1	-	-	-	Low Throughput
504650	Magenheim J (2005)	112550	109414	111.795	Reconstituted Complex	physical	interacts with	-	6667 (interacts with) 3172	SP1	HNF4A	9606	9606	-	15651981	-	-	BIOGRID	-	FRTS4|HNF4|HNF4a7|HNF4a8|HNF4a9|HNF4alpha|MODY|MODY1|NR2A1|NR2A21|TCF|TCF14	-	RP5-1013A22.1	-	Low Throughput
1273468	Wan C (2015)	113006	113003	220.995	Co-fractionation	physical	interacts with	-	7153 (interacts with) 7150	TOP2A	TOP1	9606	9606	-	26344197	Fractionation was combined with mass spectrometry from five diverse animal species to predict co-complex protein interactions conserved across metazoa using an integrative computational scoring procedure along with an SVM approach. The significant data set of 16655 PPI, was derived from a set of more than 1M interactions by examining a ROC curve of predicted interactions against reference annotat…	0.257717	BIOGRID	TOP2|TP2A	TOPI	-	RP3-511B24.1	-	High Throughput
722891	Sen S (2009)	125700	111577	283.427	Affinity Capture-MS	physical	interacts with	-	120892 (interacts with) 5591	LRRK2	PRKDC	9606	9606	-	19826009	exogenous expression of bait|figure 2.	-	BIOGRID	AURA17|DARDARIN|PARK8|RIPK7|ROCO2	DNA-PKcs|DNAPK|DNPK1|HYRC|HYRC1|IMD26|XRCC7|p350	-	-	-	Low Throughput
810439	Bhat UG (1999)	113006	111860	369.746	Affinity Capture-Western	physical	interacts with	-	7153 (interacts with) 5925	TOP2A	RB1	9606	9606	-	10393912	figure 2.	-	BIOGRID	TOP2|TP2A	OSRC|PPP1R130|RB|p105-Rb|pRb|pp110	-	RP11-174I10.1	-	Low Throughput
503405	Lee JA (2005)	112550	114973	129.946	Reconstituted Complex	physical	interacts with	-	6667 (interacts with) 9611	SP1	NCOR1	9606	9606	-	15878880	-	-	BIOGRID	-	N-CoR|N-CoR1|PPP1R109|TRAC1|hN-CoR	-	-	-	Low Throughput
683315	Chen MC (2011)	113006	109187	328.659	Affinity Capture-Western	physical	interacts with	-	7153 (interacts with) 2932	TOP2A	GSK3B	9606	9606	-	21254166	-	-	BIOGRID	TOP2|TP2A	-	-	-	-	Low Throughput
479366	Wilson AJ (2008)	112550	115106	116.855	Affinity Capture-Western	physical	interacts with	-	6667 (interacts with) 9759	SP1	HDAC4	9606	9606	-	18632985	-	-	BIOGRID	-	AHO3|BDMR|HA6116|HD4|HDAC-4|HDAC-A|HDACA	-	-	-	Low Throughput
480458	Castet A (2006)	112550	108405	276.37	Reconstituted Complex	physical	interacts with	-	6667 (interacts with) 2101	SP1	ESRRA	9606	9606	-	16439465	-	-	BIOGRID	-	ERR1|ERRa|ERRalpha|ESRL1|NR3B1	-	-	-	Low Throughput
480460	Castet A (2006)	112550	108407	340.723	Reconstituted Complex	physical	interacts with	-	6667 (interacts with) 2104	SP1	ESRRG	9606	9606	-	16439465	-	-	BIOGRID	-	ERR3|ERRgamma|NR3B3	-	-	-	Low Throughput
471108	Tapias A (2008)	112550	107454	155.845	Affinity Capture-Western	physical	interacts with	-	6667 (interacts with) 1019	SP1	CDK4	9606	9606	-	18769160	-	-	BIOGRID	-	CMM3|PSK-J3	-	-	-	Low Throughput
471110	Tapias A (2008)	112550	112393	146.635	Affinity Capture-Western	physical	interacts with	-	6667 (interacts with) 6502	SP1	SKP2	9606	9606	-	18769160	-	-	BIOGRID	-	FBL1|FBXL1|FLB1|p45	-	-	-	Low Throughput
683314	Chen MC (2011)	113006	107841	378.176	Affinity Capture-Western	physical	interacts with	-	7153 (interacts with) 1457	TOP2A	CSNK2A1	9606	9606	-	21254166	-	-	BIOGRID	TOP2|TP2A	CK2A1|CKII|CSNK2A3	-	-	-	Low Throughput
479323	Wang CH (2006)	112550	107331	136.175	Affinity Capture-Western	physical	interacts with	-	6667 (interacts with) 890	SP1	CCNA2	9606	9606	-	16575904	-	-	BIOGRID	-	CCN1|CCNA	-	-	-	Low Throughput
470837	Zhang Y (2006)	112550	111576	148.942	Affinity Capture-Western	physical	interacts with	-	6667 (interacts with) 5590	SP1	PRKCZ	9606	9606	-	16943418	-	-	BIOGRID	-	PKC-ZETA|PKC2	-	RP11-181G12.1	-	Low Throughput
722636	Zach S (2010)	125700	114011	231.124	Biochemical Activity	physical	interacts with	Phosphorylation	120892 (interacts with) 8428	LRRK2	STK24	9606	9606	-	20949042	table 1.	-	BIOGRID	AURA17|DARDARIN|PARK8|RIPK7|ROCO2	HEL-S-95|MST3|MST3B|STE20|STK3	-	RP11-111L24.5	-	High Throughput
1456061	Hein MY (2015)	123814	122908	239.487	Affinity Capture-MS	physical	interacts with	-	83903 (interacts with) 79813	GSG2	EHMT1	9606	9606	-	26496610	interaction detected by quantitative BAC-GFP interactomics (QUBIC)	-	BIOGRID	HASPIN	EUHMTASE1|Eu-HMTase1|FP13812|GLP|GLP1|KMT1D|bA188C12.1	-	RP11-188C12.1	-	High Throughput
261680	Johnson CA (2001)	113006	109315	448.627	Two-hybrid	physical	interacts with	-	7153 (interacts with) 3065	TOP2A	HDAC1	9606	9606	-	11136718	-	-	BIOGRID	TOP2|TP2A	GON-10|HD1|RPD3|RPD3L1	-	RP4-811H24.2	-	Low Throughput
722633	Zach S (2010)	125700	114300	385.519	Biochemical Activity	physical	interacts with	Phosphorylation	120892 (interacts with) 8767	LRRK2	RIPK2	9606	9606	-	20949042	figure 3.|table 1.	-	BIOGRID	AURA17|DARDARIN|PARK8|RIPK7|ROCO2	CARD3|CARDIAK|CCK|GIG30|RICK|RIP2	-	WUGSC:H_RG437L15.1	-	High Throughput|Low Throughput
722635	Zach S (2010)	125700	112664	143.465	Biochemical Activity	physical	interacts with	Phosphorylation	120892 (interacts with) 6788	LRRK2	STK3	9606	9606	-	20949042	table 1.	-	BIOGRID	AURA17|DARDARIN|PARK8|RIPK7|ROCO2	KRS1|MST2	-	-	-	High Throughput
722634	Zach S (2010)	125700	111576	122.738	Biochemical Activity	physical	interacts with	Phosphorylation	120892 (interacts with) 5590	LRRK2	PRKCZ	9606	9606	-	20949042	figure 2.|table 1.	-	BIOGRID	AURA17|DARDARIN|PARK8|RIPK7|ROCO2	PKC-ZETA|PKC2	-	RP11-181G12.1	-	High Throughput|Low Throughput
1265106	Wan C (2015)	110727	110728	54.1693	Co-fractionation	physical	interacts with	-	4643 (interacts with) 4644	MYO1E	MYO5A	9606	9606	-	26344197	Fractionation was combined with mass spectrometry from five diverse animal species to predict co-complex protein interactions conserved across metazoa using an integrative computational scoring procedure along with an SVM approach. The significant data set of 16655 PPI, was derived from a set of more than 1M interactions by examining a ROC curve of predicted interactions against reference annotat…	0.687315	BIOGRID	FSGS6|HuncM-IC|MYO1C	GS1|MYH12|MYO5|MYR12	-	-	-	High Throughput
1265093	Wan C (2015)	110727	110712	283.914	Co-fractionation	physical	interacts with	-	4643 (interacts with) 4627	MYO1E	MYH9	9606	9606	-	26344197	Fractionation was combined with mass spectrometry from five diverse animal species to predict co-complex protein interactions conserved across metazoa using an integrative computational scoring procedure along with an SVM approach. The significant data set of 16655 PPI, was derived from a set of more than 1M interactions by examining a ROC curve of predicted interactions against reference annotat…	0.232086	BIOGRID	FSGS6|HuncM-IC|MYO1C	BDPLT6|DFNA17|EPSTS|FTNS|MHA|NMHC-II-A|NMMHC-IIA|NMMHCA	-	RP1-68O2.1	-	High Throughput
283166	Sif S (1994)	112550	110857	106.385	Reconstituted Complex	physical	interacts with	-	6667 (interacts with) 4790	SP1	NFKB1	9606	9606	-	7933095	-	-	BIOGRID	-	EBP-1|KBF1|NF-kB1|NF-kappa-B|NF-kappaB|NFKB-p105|NFKB-p50|NFkappaB|p105|p50	-	-	-	Low Throughput
449007	Qing H (2009)	125700	112506	216.306	Affinity Capture-Western	physical	interacts with	-	120892 (interacts with) 6622	LRRK2	SNCA	9606	9606	-	19878656	-	-	BIOGRID	AURA17|DARDARIN|PARK8|RIPK7|ROCO2	NACP|PARK1|PARK4|PD1	-	-	-	Low Throughput
278318	Wang F (1999)	112550	106699	176.649	Reconstituted Complex	physical	interacts with	-	6667 (interacts with) 196	SP1	AHR	9606	9606	-	10471301	-	-	BIOGRID	-	bHLHe76	-	-	-	Low Throughput
278319	Wang F (1999)	112550	106898	130.101	Reconstituted Complex	physical	interacts with	-	6667 (interacts with) 405	SP1	ARNT	9606	9606	-	10471301	-	-	BIOGRID	-	HIF-1-beta|HIF-1beta|HIF1-beta|HIF1B|HIF1BETA|TANGO|bHLHe2	-	-	-	Low Throughput
1101360	Yamakawa N (2002)	106606	106607	379.282	Affinity Capture-Western	physical	interacts with	-	91 (interacts with) 92	ACVR1B	ACVR2A	9606	9606	-	11927552	-	-	BIOGRID	ACTRIB|ACVRLK4|ALK4|SKR2	ACTRII|ACVR2	-	-	-	Low Throughput
895411	Wang J (2011)	106606	112168	237.593	Two-hybrid	physical	interacts with	-	91 (interacts with) 6256	ACVR1B	RXRA	9606	9606	-	21988832	-	-	BIOGRID	ACTRIB|ACVRLK4|ALK4|SKR2	NR2B1	-	-	-	High Throughput
2534750	Pore N (2004)	113265	112878	127.388	Reconstituted Complex	physical	interacts with	-	7422 (interacts with) 7020	VEGFA	TFAP2A	9606	9606	-	15342781	EMSA	-	BIOGRID	MVCD1|VEGF|VPF	AP-2|AP-2alpha|AP2TF|BOFS|TFAP2	RP1-261G23.1	RP1-290I10.1	-	Low Throughput
2536865	Jin P (2008)	113265	108609	394.695	Protein-peptide	physical	interacts with	-	7422 (interacts with) 2321	VEGFA	FLT1	9606	9606	-	18593464	-	-	BIOGRID	MVCD1|VEGF|VPF	FLT|FLT-1|VEGFR-1|VEGFR1	RP1-261G23.1	-	-	Low Throughput
2258756	Huttlin EL (2017)	113265	131362	143.825	Affinity Capture-MS	physical	interacts with	-	7422 (interacts with) 345651	VEGFA	ACTBL2	9606	9606	-	28514442	Quantitative scores are a modified CompPASS score derived from Sowa et al., Cell, 2009 (PMID 19615732). The cut-off threshold is > 0.75.	0.900644	BIOGRID	MVCD1|VEGF|VPF	ACT	RP1-261G23.1	-	-	High Throughput
304774	De Winter JP (1996)	106606	106605	219.42	Affinity Capture-Western	physical	interacts with	-	91 (interacts with) 90	ACVR1B	ACVR1	9606	9606	-	8612709	-	-	BIOGRID	ACTRIB|ACVRLK4|ALK4|SKR2	ACTRI|ACVR1A|ACVRLK2|ALK2|FOP|SKR1|TSRI	-	-	-	Low Throughput
2532374	Poulaki V (2002)	113265	109338	347.478	Reconstituted Complex	physical	interacts with	-	7422 (interacts with) 3091	VEGFA	HIF1A	9606	9606	-	11901189	-	-	BIOGRID	MVCD1|VEGF|VPF	HIF-1A|HIF-1alpha|HIF1|HIF1-ALPHA|MOP1|PASD8|bHLHe78	RP1-261G23.1	-	-	Low Throughput
2534748	Pore N (2004)	113265	112550	285.012	Reconstituted Complex	physical	interacts with	-	7422 (interacts with) 6667	VEGFA	SP1	9606	9606	-	15342781	EMSA	-	BIOGRID	MVCD1|VEGF|VPF	-	RP1-261G23.1	-	-	Low Throughput
514093	Eyckerman S (2005)	106606	108570	133.878	PCA	physical	interacts with	-	91 (interacts with) 2280	ACVR1B	FKBP1A	9606	9606	-	15908921	interaction detected by MAPPIT	-	BIOGRID	ACTRIB|ACVRLK4|ALK4|SKR2	FKBP-12|FKBP-1A|FKBP1|FKBP12|PKC12|PKCI2|PPIASE	-	RP11-314N13.2	-	Low Throughput
2200927	Koutsioumpa M (2015)	113265	109992	102.527	Co-localization	physical	interacts with	-	7422 (interacts with) 3791	VEGFA	KDR	9606	9606	-	25644401	Positive control (Figure 5B)|Proximity ligation assay (PLA)	-	BIOGRID	MVCD1|VEGF|VPF	CD309|FLK1|VEGFR|VEGFR2	RP1-261G23.1	-	-	Low Throughput
2208198	Li Y (2016)	113265	107603	229.979	Affinity Capture-Western	physical	interacts with	-	7422 (interacts with) 1191	VEGFA	CLU	9606	9606	-	26716898	-	-	BIOGRID	MVCD1|VEGF|VPF	APO-J|APOJ|CLI|CLU1|CLU2|KUB1|NA1/NA2|SGP-2|SGP2|SP-40|TRPM-2|TRPM2	RP1-261G23.1	AAG4	-	Low Throughput
304410	Lebrun JJ (1999)	106606	110262	233.812	Affinity Capture-Western	physical	interacts with	-	91 (interacts with) 4087	ACVR1B	SMAD2	9606	9606	-	9892009	-	-	BIOGRID	ACTRIB|ACVRLK4|ALK4|SKR2	JV18|JV18-1|MADH2|MADR2|hMAD-2|hSMAD2	-	-	-	Low Throughput
304411	Lebrun JJ (1999)	106606	110263	458.591	Affinity Capture-Western	physical	interacts with	-	91 (interacts with) 4088	ACVR1B	SMAD3	9606	9606	-	9892009	-	-	BIOGRID	ACTRIB|ACVRLK4|ALK4|SKR2	HSPC193|HsT17436|JV15-2|LDS1C|LDS3|MADH3	-	-	-	Low Throughput
287228	Gengrinovitch S (1999)	113265	109079	118.518	Reconstituted Complex	physical	interacts with	-	7422 (interacts with) 2817	VEGFA	GPC1	9606	9606	-	10196157	-	-	BIOGRID	MVCD1|VEGF|VPF	glypican	RP1-261G23.1	-	-	Low Throughput
1265083	Wan C (2015)	110728	110714	106.9	Co-fractionation	physical	interacts with	-	4644 (interacts with) 4629	MYO5A	MYH11	9606	9606	-	26344197	Fractionation was combined with mass spectrometry from five diverse animal species to predict co-complex protein interactions conserved across metazoa using an integrative computational scoring procedure along with an SVM approach. The significant data set of 16655 PPI, was derived from a set of more than 1M interactions by examining a ROC curve of predicted interactions against reference annotat…	0.27229	BIOGRID	GS1|MYH12|MYO5|MYR12	AAT4|FAA4|SMHC|SMMHC	-	-	-	High Throughput
1105350	So J (2015)	107109	108258	148.718	Affinity Capture-MS	physical	interacts with	-	640 (interacts with) 1938	BLK	EEF2	9606	9606	-	25852190	-	-	BIOGRID	MODY11	EEF-2|EF-2|EF2|SCA26	-	-	-	High Throughput
2448394	Pankow S (2015)	107506	113006	555.722	Affinity Capture-MS	physical	interacts with	-	1080 (interacts with) 7153	CFTR	TOP2A	9606	9606	-	26618866	Co-Purifying Protein Identification Technology (CoPIT)	-	BIOGRID	ABC35|ABCC7|CF|CFTR/MRP|MRP7|TNR-CFTR|dJ760C5.1	TOP2|TP2A	tcag7.78	-	-	High Throughput
1105337	So J (2015)	107109	106997	115.106	Affinity Capture-MS	physical	interacts with	-	640 (interacts with) 509	BLK	ATP5C1	9606	9606	-	25852190	-	-	BIOGRID	MODY11	ATP5C|ATP5CL1	-	RP11-401E9.1	-	High Throughput
1054890	Chen H (1999)	113841	108403	202.317	Reconstituted Complex	physical	interacts with	-	8202 (interacts with) 2099	NCOA3	ESR1	9606	9606	-	10490106	-	-	BIOGRID	ACTR|AIB-1|AIB1|CAGH16|CTG26|KAT13B|RAC3|SRC-3|SRC3|TNRC14|TNRC16|TRAM-1|bHLHe42|pCIP	ER|ESR|ESRA|ESTRR|Era|NR3A1	RP5-1049G16.3	RP1-130E4.1	-	Low Throughput
1105336	So J (2015)	107109	106994	134.893	Affinity Capture-MS	physical	interacts with	-	640 (interacts with) 506	BLK	ATP5B	9606	9606	-	25852190	-	-	BIOGRID	MODY11	ATPMB|ATPSB|HEL-S-271	-	-	-	High Throughput
1054150	Goel A (2004)	113841	125732	261.371	Biochemical Activity	physical	interacts with	Acetylation	8202 (interacts with) 121504	NCOA3	HIST4H4	9606	9606	-	14747462	-	-	BIOGRID	ACTR|AIB-1|AIB1|CAGH16|CTG26|KAT13B|RAC3|SRC-3|SRC3|TNRC14|TNRC16|TRAM-1|bHLHe42|pCIP	H4/p	RP5-1049G16.3	-	-	Low Throughput
1054151	Goel A (2004)	113841	113895	405.484	Biochemical Activity	physical	interacts with	Acetylation	8202 (interacts with) 8290	NCOA3	HIST3H3	9606	9606	-	14747462	-	-	BIOGRID	ACTR|AIB-1|AIB1|CAGH16|CTG26|KAT13B|RAC3|SRC-3|SRC3|TNRC14|TNRC16|TRAM-1|bHLHe42|pCIP	H3.4|H3/g|H3FT|H3t	RP5-1049G16.3	-	-	Low Throughput
1417532	Rubio MF (2006)	113841	111902	145.564	Affinity Capture-Western	physical	interacts with	-	8202 (interacts with) 5970	NCOA3	RELA	9606	9606	-	16331275	-	-	BIOGRID	ACTR|AIB-1|AIB1|CAGH16|CTG26|KAT13B|RAC3|SRC-3|SRC3|TNRC14|TNRC16|TRAM-1|bHLHe42|pCIP	NFKB3|p65	RP5-1049G16.3	-	-	Low Throughput
1105335	So J (2015)	107109	106987	172.385	Affinity Capture-MS	physical	interacts with	-	640 (interacts with) 498	BLK	ATP5A1	9606	9606	-	25852190	-	-	BIOGRID	MODY11	ATP5A|ATP5AL2|ATPM|COXPD22|HEL-S-123m|MC5DN4|MOM2|OMR|ORM|hATP1	-	-	-	High Throughput
2448390	Pankow S (2015)	107506	112587	386.227	Affinity Capture-MS	physical	interacts with	-	1080 (interacts with) 6709	CFTR	SPTAN1	9606	9606	-	26618866	Co-Purifying Protein Identification Technology (CoPIT)	-	BIOGRID	ABC35|ABCC7|CF|CFTR/MRP|MRP7|TNR-CFTR|dJ760C5.1	EIEE5|NEAS|SPTA2	tcag7.78	-	-	High Throughput
1037149	Rolland T (2014)	107109	112651	256.255	Two-hybrid	physical	interacts with	-	640 (interacts with) 6774	BLK	STAT3	9606	9606	-	25416956	-	-	BIOGRID	MODY11	ADMIO|APRF|HIES	-	-	-	High Throughput
657858	Yi P (2008)	113841	111576	121.523	Affinity Capture-Western	physical	interacts with	-	8202 (interacts with) 5590	NCOA3	PRKCZ	9606	9606	-	18313384	figure 2D.	-	BIOGRID	ACTR|AIB-1|AIB1|CAGH16|CTG26|KAT13B|RAC3|SRC-3|SRC3|TNRC14|TNRC16|TRAM-1|bHLHe42|pCIP	PKC-ZETA|PKC2	RP5-1049G16.3	RP11-181G12.1	-	Low Throughput
279315	Hegde R (1998)	107109	107068	105.757	Reconstituted Complex	physical	interacts with	-	640 (interacts with) 596	BLK	BCL2	9606	9606	-	9525867	-	-	BIOGRID	MODY11	Bcl-2|PPP1R50	-	-	-	Low Throughput
279316	Hegde R (1998)	107109	107070	139.322	Reconstituted Complex	physical	interacts with	-	640 (interacts with) 598	BLK	BCL2L1	9606	9606	-	9525867	-	-	BIOGRID	MODY11	BCL-XL/S|BCL2L|BCLX|BCLXL|BCLXS|Bcl-X|PPP1R52|bcl-xL|bcl-xS	-	RP5-857M17.3	-	Low Throughput
608616	Wu RC (2004)	113841	110857	69.7051	Affinity Capture-Western	physical	interacts with	-	8202 (interacts with) 4790	NCOA3	NFKB1	9606	9606	-	15383283	-	-	BIOGRID	ACTR|AIB-1|AIB1|CAGH16|CTG26|KAT13B|RAC3|SRC-3|SRC3|TNRC14|TNRC16|TRAM-1|bHLHe42|pCIP	EBP-1|KBF1|NF-kB1|NF-kappa-B|NF-kappaB|NFKB-p105|NFKB-p50|NFkappaB|p105|p50	RP5-1049G16.3	-	-	Low Throughput
2448369	Pankow S (2015)	107506	111794	1091.34	Affinity Capture-MS	physical	interacts with	-	1080 (interacts with) 5836	CFTR	PYGL	9606	9606	-	26618866	Co-Purifying Protein Identification Technology (CoPIT)	-	BIOGRID	ABC35|ABCC7|CF|CFTR/MRP|MRP7|TNR-CFTR|dJ760C5.1	GSD6	tcag7.78	-	-	High Throughput
657247	Axlund SD (2010)	113841	106862	130.274	Affinity Capture-Western	physical	interacts with	-	8202 (interacts with) 367	NCOA3	AR	9606	9606	-	21047772	-	-	BIOGRID	ACTR|AIB-1|AIB1|CAGH16|CTG26|KAT13B|RAC3|SRC-3|SRC3|TNRC14|TNRC16|TRAM-1|bHLHe42|pCIP	AIS|DHTR|HUMARA|HYSP1|KD|NR3C4|SBMA|SMAX1|TFM	RP5-1049G16.3	RP11-383C12.1	-	Low Throughput
569811	Albers M (2005)	113841	108405	187.571	Two-hybrid	physical	interacts with	-	8202 (interacts with) 2101	NCOA3	ESRRA	9606	9606	-	15604093	-	-	BIOGRID	ACTR|AIB-1|AIB1|CAGH16|CTG26|KAT13B|RAC3|SRC-3|SRC3|TNRC14|TNRC16|TRAM-1|bHLHe42|pCIP	ERR1|ERRa|ERRalpha|ESRL1|NR3B1	RP5-1049G16.3	-	-	Low Throughput
2448361	Pankow S (2015)	107506	112860	434.034	Affinity Capture-MS	physical	interacts with	-	1080 (interacts with) 7001	CFTR	PRDX2	9606	9606	-	26618866	Co-Purifying Protein Identification Technology (CoPIT)	-	BIOGRID	ABC35|ABCC7|CF|CFTR/MRP|MRP7|TNR-CFTR|dJ760C5.1	HEL-S-2a|NKEF-B|NKEFB|PRP|PRX2|PRXII|PTX1|TDPX1|TPX1|TSA	tcag7.78	-	-	High Throughput
569810	Albers M (2005)	113841	111851	533.161	Two-hybrid	physical	interacts with	-	8202 (interacts with) 5916	NCOA3	RARG	9606	9606	-	15604093	-	-	BIOGRID	ACTR|AIB-1|AIB1|CAGH16|CTG26|KAT13B|RAC3|SRC-3|SRC3|TNRC14|TNRC16|TRAM-1|bHLHe42|pCIP	NR1B3|RARC	RP5-1049G16.3	-	-	Low Throughput
2448368	Pankow S (2015)	107506	113596	329.567	Affinity Capture-MS	physical	interacts with	-	1080 (interacts with) 7837	CFTR	PXDN	9606	9606	-	26618866	Co-Purifying Protein Identification Technology (CoPIT)	-	BIOGRID	ABC35|ABCC7|CF|CFTR/MRP|MRP7|TNR-CFTR|dJ760C5.1	COPOA|D2S448|D2S448E|MG50|PRG2|PXN|VPO	tcag7.78	-	-	High Throughput
571592	Jung SY (2005)	113841	110712	258.774	Affinity Capture-MS	physical	interacts with	-	8202 (interacts with) 4627	NCOA3	MYH9	9606	9606	-	16051665	-	-	BIOGRID	ACTR|AIB-1|AIB1|CAGH16|CTG26|KAT13B|RAC3|SRC-3|SRC3|TNRC14|TNRC16|TRAM-1|bHLHe42|pCIP	BDPLT6|DFNA17|EPSTS|FTNS|MHA|NMHC-II-A|NMMHC-IIA|NMMHCA	RP5-1049G16.3	RP1-68O2.1	-	Low Throughput
571593	Jung SY (2005)	113841	106573	129.895	Affinity Capture-MS	physical	interacts with	-	8202 (interacts with) 58	NCOA3	ACTA1	9606	9606	-	16051665	-	-	BIOGRID	ACTR|AIB-1|AIB1|CAGH16|CTG26|KAT13B|RAC3|SRC-3|SRC3|TNRC14|TNRC16|TRAM-1|bHLHe42|pCIP	ACTA|ASMA|CFTD|CFTD1|CFTDM|MPFD|NEM1|NEM2|NEM3	RP5-1049G16.3	RP5-1068B5.2	-	Low Throughput
472055	Oh AS (2008)	113841	106543	203.629	Reconstituted Complex	physical	interacts with	-	8202 (interacts with) 25	NCOA3	ABL1	9606	9606	-	18765637	-	-	BIOGRID	ACTR|AIB-1|AIB1|CAGH16|CTG26|KAT13B|RAC3|SRC-3|SRC3|TNRC14|TNRC16|TRAM-1|bHLHe42|pCIP	ABL|JTK7|bcr/abl|c-ABL|c-ABL1|p150|v-abl	RP5-1049G16.3	RP11-83J21.1	-	Low Throughput
2448355	Pankow S (2015)	107506	134384	265.424	Affinity Capture-MS	physical	interacts with	-	1080 (interacts with) 399687	CFTR	MYO18A	9606	9606	-	26618866	Co-Purifying Protein Identification Technology (CoPIT)	-	BIOGRID	ABC35|ABCC7|CF|CFTR/MRP|MRP7|TNR-CFTR|dJ760C5.1	MYSPDZ|SPR210	tcag7.78	-	-	High Throughput
2448345	Pankow S (2015)	107506	109894	344.605	Affinity Capture-MS	physical	interacts with	-	1080 (interacts with) 3688	CFTR	ITGB1	9606	9606	-	26618866	Co-Purifying Protein Identification Technology (CoPIT)	-	BIOGRID	ABC35|ABCC7|CF|CFTR/MRP|MRP7|TNR-CFTR|dJ760C5.1	CD29|FNRB|GPIIA|MDF2|MSK12|VLA-BETA|VLAB	tcag7.78	RP11-479G22.2	-	High Throughput
2448352	Pankow S (2015)	107506	110235	434.578	Affinity Capture-MS	physical	interacts with	-	1080 (interacts with) 4057	CFTR	LTF	9606	9606	-	26618866	Co-Purifying Protein Identification Technology (CoPIT)	-	BIOGRID	ABC35|ABCC7|CF|CFTR/MRP|MRP7|TNR-CFTR|dJ760C5.1	GIG12|HEL110|HLF2|LF	tcag7.78	-	-	High Throughput
276627	Chen H (1997)	113841	112168	106.754	Reconstituted Complex	physical	interacts with	-	8202 (interacts with) 6256	NCOA3	RXRA	9606	9606	-	9267036	-	-	BIOGRID	ACTR|AIB-1|AIB1|CAGH16|CTG26|KAT13B|RAC3|SRC-3|SRC3|TNRC14|TNRC16|TRAM-1|bHLHe42|pCIP	NR2B1	RP5-1049G16.3	-	-	Low Throughput
2573668	Costa R (2014)	116667	107841	182.898	Affinity Capture-Western	physical	interacts with	-	23028 (interacts with) 1457	KDM1A	CSNK2A1	9606	9606	-	24486797	-	-	BIOGRID	AOF2|BHC110|KDM1|LSD1	CK2A1|CKII|CSNK2A3	RP1-184J9.1	-	-	Low Throughput
283412	Zwijsen RM (1998)	113841	107067	88.0335	Affinity Capture-Western	physical	interacts with	-	8202 (interacts with) 595	NCOA3	CCND1	9606	9606	-	9832502	-	-	BIOGRID	ACTR|AIB-1|AIB1|CAGH16|CTG26|KAT13B|RAC3|SRC-3|SRC3|TNRC14|TNRC16|TRAM-1|bHLHe42|pCIP	BCL1|D11S287E|PRAD1|U21B31	RP5-1049G16.3	-	-	Low Throughput
2532481	Amente S (2015)	116667	107460	125.714	Co-localization	physical	interacts with	-	23028 (interacts with) 1026	KDM1A	CDKN1A	9606	9606	-	26062444	ChIP	-	BIOGRID	AOF2|BHC110|KDM1|LSD1	CAP20|CDKN1|CIP1|MDA-6|P21|SDI1|WAF1|p21CIP1	RP1-184J9.1	-	-	Low Throughput
2532483	Amente S (2015)	116667	107603	315.926	Co-localization	physical	interacts with	-	23028 (interacts with) 1191	KDM1A	CLU	9606	9606	-	26062444	ChIP	-	BIOGRID	AOF2|BHC110|KDM1|LSD1	APO-J|APOJ|CLI|CLU1|CLU2|KUB1|NA1/NA2|SGP-2|SGP2|SP-40|TRPM-2|TRPM2	RP1-184J9.1	AAG4	-	Low Throughput
2448340	Pankow S (2015)	107506	109535	355.498	Affinity Capture-MS	physical	interacts with	-	1080 (interacts with) 3303	CFTR	HSPA1A	9606	9606	-	26618866	Co-Purifying Protein Identification Technology (CoPIT)	-	BIOGRID	ABC35|ABCC7|CF|CFTR/MRP|MRP7|TNR-CFTR|dJ760C5.1	HEL-S-103|HSP70-1|HSP70-1A|HSP70I|HSP72|HSPA1	tcag7.78	DAQB-147D11.1	-	High Throughput
2469703	Zhou A (2016)	116667	109187	139.682	Affinity Capture-Western	physical	interacts with	-	23028 (interacts with) 2932	KDM1A	GSK3B	9606	9606	-	27501329	-	-	BIOGRID	AOF2|BHC110|KDM1|LSD1	-	RP1-184J9.1	-	-	Low Throughput
2512787	Takagi S (2017)	116667	109315	162.128	Affinity Capture-Western	physical	interacts with	-	23028 (interacts with) 3065	KDM1A	HDAC1	9606	9606	-	28667074	-	-	BIOGRID	AOF2|BHC110|KDM1|LSD1	GON-10|HD1|RPD3|RPD3L1	RP1-184J9.1	RP4-811H24.2	-	Low Throughput
2512788	Takagi S (2017)	116667	109316	73.6721	Affinity Capture-Western	physical	interacts with	-	23028 (interacts with) 3066	KDM1A	HDAC2	9606	9606	-	28667074	-	-	BIOGRID	AOF2|BHC110|KDM1|LSD1	HD2|RPD3|YAF1	RP1-184J9.1	-	-	Low Throughput
2469428	Cao C (2017)	116667	115331	141.894	Affinity Capture-Western	physical	interacts with	-	23028 (interacts with) 10014	KDM1A	HDAC5	9606	9606	-	27212032	-	-	BIOGRID	AOF2|BHC110|KDM1|LSD1	HD5|NY-CO-9	RP1-184J9.1	-	-	Low Throughput
2448330	Pankow S (2015)	107506	108299	301.214	Affinity Capture-MS	physical	interacts with	-	1080 (interacts with) 1984	CFTR	EIF5A	9606	9606	-	26618866	Co-Purifying Protein Identification Technology (CoPIT)	-	BIOGRID	ABC35|ABCC7|CF|CFTR/MRP|MRP7|TNR-CFTR|dJ760C5.1	EIF-5A|EIF5A1|eIF5AI	tcag7.78	-	-	High Throughput
2450499	Rivero S (2015)	116667	112499	122.035	Affinity Capture-Western	physical	interacts with	-	23028 (interacts with) 6615	KDM1A	SNAI1	9606	9606	-	25639869	-	-	BIOGRID	AOF2|BHC110|KDM1|LSD1	SLUGH2|SNA|SNAH|SNAIL|SNAIL1|dJ710H13.1	RP1-184J9.1	-	-	Low Throughput
2448323	Pankow S (2015)	107506	107880	663.961	Affinity Capture-MS	physical	interacts with	-	1080 (interacts with) 1499	CFTR	CTNNB1	9606	9606	-	26618866	Co-Purifying Protein Identification Technology (CoPIT)	-	BIOGRID	ABC35|ABCC7|CF|CFTR/MRP|MRP7|TNR-CFTR|dJ760C5.1	CTNNB|MRD19|armadillo	tcag7.78	OK/SW-cl.35	-	High Throughput
697083	Jung H (2008)	110428	113010	433.506	Affinity Capture-Western	physical	interacts with	-	4282 (interacts with) 7157	MIF	TP53	9606	9606	-	18815136	-	-	BIOGRID	GIF|GLIF|MMIF	BCC7|LFS1|P53|TRP53	-	-	-	Low Throughput
2204766	Zheng Y (2015)	110428	108276	463.933	Reconstituted Complex	physical	interacts with	-	4282 (interacts with) 1956	MIF	EGFR	9606	9606	-	26280537	-	-	BIOGRID	GIF|GLIF|MMIF	ERBB|ERBB1|HER1|NISBD2|PIG61|mENA	-	-	-	Low Throughput
2448319	Pankow S (2015)	107506	107569	504.129	Affinity Capture-MS	physical	interacts with	-	1080 (interacts with) 1147	CFTR	CHUK	9606	9606	-	26618866	Co-Purifying Protein Identification Technology (CoPIT)	-	BIOGRID	ABC35|ABCC7|CF|CFTR/MRP|MRP7|TNR-CFTR|dJ760C5.1	IKBKA|IKK-alpha|IKK1|IKKA|NFKBIKA|TCF16	tcag7.78	-	-	High Throughput
1504647	Chen TC (2014)	107460	107461	120.312	Co-localization	physical	interacts with	-	1026 (interacts with) 1027	CDKN1A	CDKN1B	9606	9606	-	25241761	in situ PLA	-	BIOGRID	CAP20|CDKN1|CIP1|MDA-6|P21|SDI1|WAF1|p21CIP1	CDKN4|KIP1|MEN1B|MEN4|P27KIP1	-	-	-	High Throughput
1504646	Chen TC (2014)	107460	112651	292.095	Co-localization	physical	interacts with	-	1026 (interacts with) 6774	CDKN1A	STAT3	9606	9606	-	25241761	in situ PLA	-	BIOGRID	CAP20|CDKN1|CIP1|MDA-6|P21|SDI1|WAF1|p21CIP1	ADMIO|APRF|HIES	-	-	-	High Throughput
1174933	Peng B (2015)	116667	107842	211.536	Affinity Capture-Western	physical	interacts with	-	23028 (interacts with) 1459	KDM1A	CSNK2A2	9606	9606	-	25999347	-	-	BIOGRID	AOF2|BHC110|KDM1|LSD1	CK2A2|CSNK2A1	RP1-184J9.1	-	-	Low Throughput
1504650	Chen TC (2014)	107460	108597	122.992	Co-localization	physical	interacts with	-	1026 (interacts with) 2308	CDKN1A	FOXO1	9606	9606	-	25241761	in situ PLA	-	BIOGRID	CAP20|CDKN1|CIP1|MDA-6|P21|SDI1|WAF1|p21CIP1	FKH1|FKHR|FOXO1A	-	-	-	High Throughput
2229073	Huttlin EL (2017)	111564	108992	273.522	Affinity Capture-MS	physical	interacts with	-	5578 (interacts with) 2730	PRKCA	GCLM	9606	9606	-	28514442	Quantitative scores are a modified CompPASS score derived from Sowa et al., Cell, 2009 (PMID 19615732). The cut-off threshold is > 0.75.	0.999696	BIOGRID	AAG6|PKC-alpha|PKCA|PRKACA	GLCLR	-	RP4-561L24.2	-	High Throughput
1508264	Dai M (2012)	107460	110263	237.738	Affinity Capture-Western	physical	interacts with	-	1026 (interacts with) 4088	CDKN1A	SMAD3	9606	9606	-	22995475	Figure 6	-	BIOGRID	CAP20|CDKN1|CIP1|MDA-6|P21|SDI1|WAF1|p21CIP1	HSPC193|HsT17436|JV15-2|LDS1C|LDS3|MADH3	-	-	-	Low Throughput
2448299	Pankow S (2015)	107506	111507	489.362	Affinity Capture-MS	physical	interacts with	-	1080 (interacts with) 5515	CFTR	PPP2CA	9606	9606	-	26618866	Co-Purifying Protein Identification Technology (CoPIT)	-	BIOGRID	ABC35|ABCC7|CF|CFTR/MRP|MRP7|TNR-CFTR|dJ760C5.1	PP2Ac|PP2CA|PP2Calpha|RP-C	tcag7.78	-	-	High Throughput
2216951	Huttlin EL (2017)	111564	111565	116.758	Affinity Capture-MS	physical	interacts with	-	5578 (interacts with) 5579	PRKCA	PRKCB	9606	9606	-	28514442	Quantitative scores are a modified CompPASS score derived from Sowa et al., Cell, 2009 (PMID 19615732). The cut-off threshold is > 0.75.	1	BIOGRID	AAG6|PKC-alpha|PKCA|PRKACA	PKC-beta|PKCB|PRKCB1|PRKCB2	-	-	-	High Throughput
1046257	Rolland T (2014)	116667	121415	653.895	Two-hybrid	physical	interacts with	-	23028 (interacts with) 57159	KDM1A	TRIM54	9606	9606	-	25416956	-	-	BIOGRID	AOF2|BHC110|KDM1|LSD1	MURF|MURF-3|RNF30|muRF3	RP1-184J9.1	-	-	High Throughput
2224335	Huttlin EL (2017)	111564	111569	404.028	Affinity Capture-MS	physical	interacts with	-	5578 (interacts with) 5583	PRKCA	PRKCH	9606	9606	-	28514442	Quantitative scores are a modified CompPASS score derived from Sowa et al., Cell, 2009 (PMID 19615732). The cut-off threshold is > 0.75.	0.999975	BIOGRID	AAG6|PKC-alpha|PKCA|PRKACA	PKC-L|PKCL|PRKCL|nPKC-eta	-	-	-	High Throughput
1416619	Bloom DA (2003)	111564	110852	205.681	Biochemical Activity	physical	interacts with	Phosphorylation	5578 (interacts with) 4780	PRKCA	NFE2L2	9606	9606	-	12947090	-	-	BIOGRID	AAG6|PKC-alpha|PKCA|PRKACA	NRF2	-	-	-	Low Throughput
1105954	Heron-Milhavet L (2006)	107460	106711	255.583	Reconstituted Complex	physical	interacts with	-	1026 (interacts with) 208	CDKN1A	AKT2	9606	9606	-	16982699	-	-	BIOGRID	CAP20|CDKN1|CIP1|MDA-6|P21|SDI1|WAF1|p21CIP1	HIHGHH|PKBB|PKBBETA|PRKBB|RAC-BETA	-	-	-	Low Throughput
869860	Joshi P (2013)	116667	114368	69.0315	Affinity Capture-Western	physical	interacts with	-	23028 (interacts with) 8841	KDM1A	HDAC3	9606	9606	-	23752268	-	-	BIOGRID	AOF2|BHC110|KDM1|LSD1	HD3|RPD3|RPD3-2	RP1-184J9.1	-	-	Low Throughput
1037478	Rolland T (2014)	107460	121415	986.328	Two-hybrid	physical	interacts with	-	1026 (interacts with) 57159	CDKN1A	TRIM54	9606	9606	-	25416956	-	-	BIOGRID	CAP20|CDKN1|CIP1|MDA-6|P21|SDI1|WAF1|p21CIP1	MURF|MURF-3|RNF30|muRF3	-	-	-	High Throughput
1277923	Ko SJ (2012)	111564	109172	580.212	Biochemical Activity	physical	interacts with	Phosphorylation	5578 (interacts with) 2915	PRKCA	GRM5	9606	9606	-	23152621	-	-	BIOGRID	AAG6|PKC-alpha|PKCA|PRKACA	GPRC1E|MGLUR5|PPP1R86|mGlu5	-	-	-	Low Throughput
676553	Cui S (2011)	116667	115457	152.213	Affinity Capture-Western	physical	interacts with	-	23028 (interacts with) 10155	KDM1A	TRIM28	9606	9606	-	21670149	figure 7.	-	BIOGRID	AOF2|BHC110|KDM1|LSD1	KAP1|PPP1R157|RNF96|TF1B|TIF1B	RP1-184J9.1	-	-	Low Throughput
1112187	Dey M (2011)	111564	108285	175.672	Biochemical Activity	physical	interacts with	Phosphorylation	5578 (interacts with) 1965	PRKCA	EIF2S1	9606	9606	-	21368187	-	-	BIOGRID	AAG6|PKC-alpha|PKCA|PRKACA	EIF-2|EIF-2A|EIF-2alpha|EIF2|EIF2A	-	-	-	Low Throughput
954310	Fogeron ML (2013)	107460	109535	150.588	Affinity Capture-MS	physical	interacts with	-	1026 (interacts with) 3303	CDKN1A	HSPA1A	9606	9606	-	23443559	-	-	BIOGRID	CAP20|CDKN1|CIP1|MDA-6|P21|SDI1|WAF1|p21CIP1	HEL-S-103|HSP70-1|HSP70-1A|HSP70I|HSP72|HSPA1	-	DAQB-147D11.1	-	High Throughput
914325	Wang Y (2011)	111564	107948	6227.64	Biochemical Activity	physical	interacts with	Phosphorylation	5578 (interacts with) 1576	PRKCA	CYP3A4	9606	9606	-	22101235	-	-	BIOGRID	AAG6|PKC-alpha|PKCA|PRKACA	CP33|CP34|CYP3A|CYP3A3|CYPIIIA3|CYPIIIA4|HLP|NF-25|P450C3|P450PCN1	-	-	-	Low Throughput
1056589	von Knethen A (2007)	111564	111464	475.946	Two-hybrid	physical	interacts with	-	5578 (interacts with) 5468	PRKCA	PPARG	9606	9606	-	17325208	Figure 7|mammalian two-hybrid	-	BIOGRID	AAG6|PKC-alpha|PKCA|PRKACA	CIMT1|GLM1|NR1C3|PPARG1|PPARG2|PPARgamma	-	-	-	Low Throughput
656930	Yang J (2010)	116667	112651	198.289	Biochemical Activity	physical	interacts with	Demethylation	23028 (interacts with) 6774	KDM1A	STAT3	9606	9606	-	21098664	-	-	BIOGRID	AOF2|BHC110|KDM1|LSD1	ADMIO|APRF|HIES	RP1-184J9.1	-	-	Low Throughput
954316	Fogeron ML (2013)	107460	111279	549.119	Affinity Capture-MS	physical	interacts with	-	1026 (interacts with) 5261	CDKN1A	PHKG2	9606	9606	-	23443559	-	-	BIOGRID	CAP20|CDKN1|CIP1|MDA-6|P21|SDI1|WAF1|p21CIP1	GSD9C	-	RP11-2C24.4	-	High Throughput
954298	Fogeron ML (2013)	107460	108326	191.652	Affinity Capture-MS	physical	interacts with	-	1026 (interacts with) 2011	CDKN1A	MARK2	9606	9606	-	23443559	-	-	BIOGRID	CAP20|CDKN1|CIP1|MDA-6|P21|SDI1|WAF1|p21CIP1	EMK-1|EMK1|PAR-1|Par-1b|Par1b	-	-	-	High Throughput
531809	Garcia-Bassets I (2007)	116667	108403	238.818	Affinity Capture-Western	physical	interacts with	-	23028 (interacts with) 2099	KDM1A	ESR1	9606	9606	-	17289570	-	-	BIOGRID	AOF2|BHC110|KDM1|LSD1	ER|ESR|ESRA|ESTRR|Era|NR3A1	RP1-184J9.1	RP1-130E4.1	-	Low Throughput
854629	Taylor JA (1999)	111564	110859	285.781	Biochemical Activity	physical	interacts with	Phosphorylation	5578 (interacts with) 4792	PRKCA	NFKBIA	9606	9606	-	10398585	-	-	BIOGRID	AAG6|PKC-alpha|PKCA|PRKACA	IKBA|MAD-3|NFKBI	-	-	-	Low Throughput
818209	Oh ES (1997)	111564	112285	682.35	Biochemical Activity	physical	interacts with	Phosphorylation	5578 (interacts with) 6383	PRKCA	SDC2	9606	9606	-	9244383	-	-	BIOGRID	AAG6|PKC-alpha|PKCA|PRKACA	CD362|HSPG|HSPG1|SYND2	-	-	-	Low Throughput
506514	Chau CM (2008)	116667	111860	113.123	Affinity Capture-Western	physical	interacts with	-	23028 (interacts with) 5925	KDM1A	RB1	9606	9606	-	18216119	-	-	BIOGRID	AOF2|BHC110|KDM1|LSD1	OSRC|PPP1R130|RB|p105-Rb|pRb|pp110	RP1-184J9.1	RP11-174I10.1	-	Low Throughput
829905	Fang X (2002)	111564	109186	183.367	Biochemical Activity	physical	interacts with	Phosphorylation	5578 (interacts with) 2931	PRKCA	GSK3A	9606	9606	-	11884598	-	-	BIOGRID	AAG6|PKC-alpha|PKCA|PRKACA	-	-	-	-	Low Throughput
521838	Huang J (2007)	116667	113010	452.436	Biochemical Activity	physical	interacts with	Demethylation	23028 (interacts with) 7157	KDM1A	TP53	9606	9606	-	17805299	-	-	BIOGRID	AOF2|BHC110|KDM1|LSD1	BCC7|LFS1|P53|TRP53	RP1-184J9.1	-	-	Low Throughput
835827	Wechsler A (1998)	111564	109159	598.157	Biochemical Activity	physical	interacts with	Phosphorylation	5578 (interacts with) 2902	PRKCA	GRIN1	9606	9606	-	9670010	phosphorlation decreases binding to spectrin	-	BIOGRID	AAG6|PKC-alpha|PKCA|PRKACA	GluN1|MRD8|NMD-R1|NMDA1|NMDAR1|NR1	-	RP11-350O14.1	-	Low Throughput
483485	Shi YJ (2005)	116667	109535	131.961	Affinity Capture-MS	physical	interacts with	-	23028 (interacts with) 3303	KDM1A	HSPA1A	9606	9606	-	16140033	-	-	BIOGRID	AOF2|BHC110|KDM1|LSD1	HEL-S-103|HSP70-1|HSP70-1A|HSP70I|HSP72|HSPA1	RP1-184J9.1	DAQB-147D11.1	-	Low Throughput
727139	Wells NJ (1995)	111564	113006	327.527	Biochemical Activity	physical	interacts with	Phosphorylation	5578 (interacts with) 7153	PRKCA	TOP2A	9606	9606	-	7499337	-	-	BIOGRID	AAG6|PKC-alpha|PKCA|PRKACA	TOP2|TP2A	-	-	-	Low Throughput
736610	Manes NP (2005)	111564	111228	342.306	Biochemical Activity	physical	interacts with	Phosphorylation	5578 (interacts with) 5207	PRKCA	PFKFB1	9606	9606	-	15896703	-	-	BIOGRID	AAG6|PKC-alpha|PKCA|PRKACA	F6PK|HL2K|PFRX	-	-	-	Low Throughput
954284	Fogeron ML (2013)	107460	128308	379.344	Affinity Capture-MS	physical	interacts with	-	1026 (interacts with) 200186	CDKN1A	CRTC2	9606	9606	-	23443559	-	-	BIOGRID	CAP20|CDKN1|CIP1|MDA-6|P21|SDI1|WAF1|p21CIP1	TORC-2|TORC2	-	RP11-422P24.6	-	High Throughput
644583	Mertz JA (2011)	111564	107880	867.762	Affinity Capture-Western	physical	interacts with	-	5578 (interacts with) 1499	PRKCA	CTNNB1	9606	9606	-	21949397	-	-	BIOGRID	AAG6|PKC-alpha|PKCA|PRKACA	CTNNB|MRD19|armadillo	-	OK/SW-cl.35	-	Low Throughput
2448250	Pankow S (2015)	107506	107297	399.425	Affinity Capture-MS	physical	interacts with	-	1080 (interacts with) 847	CFTR	CAT	9606	9606	-	26618866	Co-Purifying Protein Identification Technology (CoPIT)	-	BIOGRID	ABC35|ABCC7|CF|CFTR/MRP|MRP7|TNR-CFTR|dJ760C5.1	-	tcag7.78	-	-	High Throughput
657833	Delvecchio CJ (2008)	111564	113222	290.184	Biochemical Activity	physical	interacts with	Phosphorylation	5578 (interacts with) 7376	PRKCA	NR1H2	9606	9606	-	18372238	figure 6.	-	BIOGRID	AAG6|PKC-alpha|PKCA|PRKACA	LXR-b|LXRB|NER|NER-I|RIP15|UNR	-	-	-	Low Throughput
668474	Prevostel C (1998)	111564	113895	591.224	Biochemical Activity	physical	interacts with	Phosphorylation	5578 (interacts with) 8290	PRKCA	HIST3H3	9606	9606	-	9716497	-	-	BIOGRID	AAG6|PKC-alpha|PKCA|PRKACA	H3.4|H3/g|H3FT|H3t	-	-	-	Low Throughput
632468	Rininsland F (2005)	111564	108293	230.767	Biochemical Activity	physical	interacts with	Phosphorylation	5578 (interacts with) 1978	PRKCA	EIF4EBP1	9606	9606	-	15927069	-	-	BIOGRID	AAG6|PKC-alpha|PKCA|PRKACA	4E-BP1|4EBP1|BP-1|PHAS-I	-	-	-	High Throughput
644581	Mertz JA (2011)	111564	115330	569.324	Reconstituted Complex	physical	interacts with	-	5578 (interacts with) 10013	PRKCA	HDAC6	9606	9606	-	21949397	-	-	BIOGRID	AAG6|PKC-alpha|PKCA|PRKACA	CPBHM|HD6|PPP1R90	-	JM21	-	Low Throughput
2603916	Choi HH (2014)	116369	107841	142.805	Co-purification	physical	interacts with	-	11200 (interacts with) 1457	CHEK2	CSNK2A1	9606	9606	-	23178491	-	-	BIOGRID	CDS1|CHK2|HuCds1|LFS2|PP1425|RAD53|hCds1	CK2A1|CKII|CSNK2A3	RP11-436C9.1	-	-	Low Throughput
893508	Wang J (2011)	107460	113222	296.777	Two-hybrid	physical	interacts with	-	1026 (interacts with) 7376	CDKN1A	NR1H2	9606	9606	-	21988832	-	-	BIOGRID	CAP20|CDKN1|CIP1|MDA-6|P21|SDI1|WAF1|p21CIP1	LXR-b|LXRB|NER|NER-I|RIP15|UNR	-	-	-	High Throughput
2603912	Choi HH (2014)	116369	111507	135.437	Co-purification	physical	interacts with	-	11200 (interacts with) 5515	CHEK2	PPP2CA	9606	9606	-	23178491	-	-	BIOGRID	CDS1|CHK2|HuCds1|LFS2|PP1425|RAD53|hCds1	PP2Ac|PP2CA|PP2Calpha|RP-C	RP11-436C9.1	-	-	Low Throughput
954261	Fogeron ML (2013)	107460	111869	149.107	Affinity Capture-MS	physical	interacts with	-	1026 (interacts with) 5934	CDKN1A	RBL2	9606	9606	-	23443559	-	-	BIOGRID	CAP20|CDKN1|CIP1|MDA-6|P21|SDI1|WAF1|p21CIP1	P130|Rb2	-	-	-	High Throughput
2603913	Choi HH (2014)	116369	108578	101.211	Co-purification	physical	interacts with	-	11200 (interacts with) 2288	CHEK2	FKBP4	9606	9606	-	23178491	-	-	BIOGRID	CDS1|CHK2|HuCds1|LFS2|PP1425|RAD53|hCds1	FKBP51|FKBP52|FKBP59|HBI|Hsp56|PPIase|p52	RP11-436C9.1	-	-	Low Throughput
954263	Fogeron ML (2013)	107460	109545	136.602	Affinity Capture-MS	physical	interacts with	-	1026 (interacts with) 3313	CDKN1A	HSPA9	9606	9606	-	23443559	-	-	BIOGRID	CAP20|CDKN1|CIP1|MDA-6|P21|SDI1|WAF1|p21CIP1	CRP40|CSA|GRP-75|GRP75|HEL-S-124m|HSPA9B|MOT|MOT2|MTHSP75|PBP74	-	-	-	High Throughput
557215	Lallena MJ (1999)	111564	107569	386.309	Affinity Capture-Western	physical	interacts with	-	5578 (interacts with) 1147	PRKCA	CHUK	9606	9606	-	10022904	-	-	BIOGRID	AAG6|PKC-alpha|PKCA|PRKACA	IKBKA|IKK-alpha|IKK1|IKKA|NFKBIKA|TCF16	-	-	-	Low Throughput
315192	Parsons M (2002)	111564	109894	295.843	Affinity Capture-Western	physical	interacts with	-	5578 (interacts with) 3688	PRKCA	ITGB1	9606	9606	-	12138200	-	-	BIOGRID	AAG6|PKC-alpha|PKCA|PRKACA	CD29|FNRB|GPIIA|MDF2|MSK12|VLA-BETA|VLAB	-	RP11-479G22.2	-	Low Throughput
317251	Martelli AM (2002)	111564	110186	904.793	Protein-peptide	physical	interacts with	-	5578 (interacts with) 4000	PRKCA	LMNA	9606	9606	-	12112001	-	-	BIOGRID	AAG6|PKC-alpha|PKCA|PRKACA	CDCD1|CDDC|CMD1A|CMT2B1|EMD2|FPL|FPLD|FPLD2|HGPS|IDC|LDP1|LFP|LGMD1B|LMN1|LMNC|LMNL1|PRO1	-	RP11-54H19.1	-	Low Throughput
1059517	Yamamori T (2010)	106825	116983	100.847	Affinity Capture-Western	physical	interacts with	-	328 (interacts with) 23411	APEX1	SIRT1	9606	9606	-	19934257	-	-	BIOGRID	APE|APE1|APEN|APEX|APX|HAP1|REF1	SIR2L1	-	RP11-57G10.3	-	Low Throughput
2448239	Pankow S (2015)	107506	107044	1099.89	Affinity Capture-MS	physical	interacts with	-	1080 (interacts with) 567	CFTR	B2M	9606	9606	-	26618866	Co-Purifying Protein Identification Technology (CoPIT)	-	BIOGRID	ABC35|ABCC7|CF|CFTR/MRP|MRP7|TNR-CFTR|dJ760C5.1	-	tcag7.78	CDABP0092	-	High Throughput
606254	Chen W (2009)	107460	110852	169.625	Affinity Capture-Western	physical	interacts with	-	1026 (interacts with) 4780	CDKN1A	NFE2L2	9606	9606	-	19560419	-	-	BIOGRID	CAP20|CDKN1|CIP1|MDA-6|P21|SDI1|WAF1|p21CIP1	NRF2	-	-	-	Low Throughput
737913	Olah J (2011)	107460	106848	1449.22	Reconstituted Complex	physical	interacts with	-	1026 (interacts with) 351	CDKN1A	APP	9606	9606	-	21832049	-	-	BIOGRID	CAP20|CDKN1|CIP1|MDA-6|P21|SDI1|WAF1|p21CIP1	AAA|ABETA|ABPP|AD1|APPI|CTFgamma|CVAP|PN-II|PN2	-	-	-	High Throughput
287945	Goode N (1992)	111564	109187	533.234	Biochemical Activity	physical	interacts with	Phosphorylation	5578 (interacts with) 2932	PRKCA	GSK3B	9606	9606	-	1324914	-	-	BIOGRID	AAG6|PKC-alpha|PKCA|PRKACA	-	-	-	-	Low Throughput
926355	Kristensen AR (2012)	106825	113147	89.4269	Co-fractionation	physical	interacts with	-	328 (interacts with) 7296	APEX1	TXNRD1	9606	9606	-	22863883	-	-	BIOGRID	APE|APE1|APEN|APEX|APX|HAP1|REF1	GRIM-12|TR|TR1|TRXR1|TXNR	-	-	-	High Throughput
262835	Srivenugopal KS (2000)	111564	110411	216.865	Biochemical Activity	physical	interacts with	Phosphorylation	5578 (interacts with) 4255	PRKCA	MGMT	9606	9606	-	10667577	-	-	BIOGRID	AAG6|PKC-alpha|PKCA|PRKACA	-	-	RP11-109A6.1	-	Low Throughput
255991	Gauthier ML (2003)	111564	108276	1649.92	Affinity Capture-Western	physical	interacts with	-	5578 (interacts with) 1956	PRKCA	EGFR	9606	9606	-	12878187	-	-	BIOGRID	AAG6|PKC-alpha|PKCA|PRKACA	ERBB|ERBB1|HER1|NISBD2|PIG61|mENA	-	-	-	Low Throughput
739932	Olah J (2011)	106825	106848	500.616	Reconstituted Complex	physical	interacts with	-	328 (interacts with) 351	APEX1	APP	9606	9606	-	21832049	-	-	BIOGRID	APE|APE1|APEN|APEX|APX|HAP1|REF1	AAA|ABETA|ABPP|AD1|APPI|CTFgamma|CVAP|PN-II|PN2	-	-	-	High Throughput
820605	Gray MJ (2005)	106825	112651	120.82	Affinity Capture-Western	physical	interacts with	-	328 (interacts with) 6774	APEX1	STAT3	9606	9606	-	15735682	ChIP	-	BIOGRID	APE|APE1|APEN|APEX|APX|HAP1|REF1	ADMIO|APRF|HIES	-	-	-	Low Throughput
2603888	Choi HH (2014)	116369	113871	117.831	Co-purification	physical	interacts with	-	11200 (interacts with) 8243	CHEK2	SMC1A	9606	9606	-	23178491	-	-	BIOGRID	CDS1|CHK2|HuCds1|LFS2|PP1425|RAD53|hCds1	CDLS2|DXS423E|SB1.8|SMC1|SMC1L1|SMC1alpha|SMCB	RP11-436C9.1	RP6-29D12.1	-	Low Throughput
2603890	Choi HH (2014)	116369	110187	159.932	Co-purification	physical	interacts with	-	11200 (interacts with) 4001	CHEK2	LMNB1	9606	9606	-	23178491	-	-	BIOGRID	CDS1|CHK2|HuCds1|LFS2|PP1425|RAD53|hCds1	ADLD|LMN|LMN2|LMNB	RP11-436C9.1	-	-	Low Throughput
593436	Xie Y (2010)	111262	111310	201.12	Affinity Capture-Western	physical	interacts with	-	5243 (interacts with) 5292	ABCB1	PIM1	9606	9606	-	20460432	-	-	BIOGRID	ABC20|CD243|CLCS|GP170|MDR1|P-GP|PGY1	PIM	-	-	-	Low Throughput
602492	Vinayagam A (2011)	107460	119529	344.792	Two-hybrid	physical	interacts with	-	1026 (interacts with) 51412	CDKN1A	ACTL6B	9606	9606	-	21900206	-	-	BIOGRID	CAP20|CDKN1|CIP1|MDA-6|P21|SDI1|WAF1|p21CIP1	ACTL6|BAF53B	-	-	-	High Throughput
287968	Al-Hallaq RA (2002)	109159	125508	260.243	Affinity Capture-Western	physical	interacts with	-	2902 (interacts with) 116443	GRIN1	GRIN3A	9606	9606	-	12391275	-	-	BIOGRID	GluN1|MRD8|NMD-R1|NMDA1|NMDAR1|NR1	GluN3A|NMDAR-L|NR3A	RP11-350O14.1	-	-	Low Throughput
835818	Wechsler A (1998)	109159	112587	736.723	Reconstituted Complex	physical	interacts with	-	2902 (interacts with) 6709	GRIN1	SPTAN1	9606	9606	-	9670010	-	-	BIOGRID	GluN1|MRD8|NMD-R1|NMDA1|NMDAR1|NR1	EIEE5|NEAS|SPTA2	RP11-350O14.1	-	-	Low Throughput
602493	Vinayagam A (2011)	107460	111332	203.012	Two-hybrid	physical	interacts with	-	1026 (interacts with) 5315	CDKN1A	PKM	9606	9606	-	21900206	-	-	BIOGRID	CAP20|CDKN1|CIP1|MDA-6|P21|SDI1|WAF1|p21CIP1	CTHBP|HEL-S-30|OIP3|PK3|PKM2|TCB|THBP1	-	-	-	High Throughput
2603881	Choi HH (2014)	116369	111332	159.45	Co-purification	physical	interacts with	-	11200 (interacts with) 5315	CHEK2	PKM	9606	9606	-	23178491	-	-	BIOGRID	CDS1|CHK2|HuCds1|LFS2|PP1425|RAD53|hCds1	CTHBP|HEL-S-30|OIP3|PK3|PKM2|TCB|THBP1	RP11-436C9.1	-	-	Low Throughput
716376	Vascotto C (2009)	106825	110929	91.9897	Affinity Capture-Western	physical	interacts with	-	328 (interacts with) 4869	APEX1	NPM1	9606	9606	-	19188445	-	-	BIOGRID	APE|APE1|APEN|APEX|APX|HAP1|REF1	B23|NPM	-	-	-	Low Throughput
698671	Seemann S (2005)	106825	113010	276.297	Affinity Capture-Western	physical	interacts with	-	328 (interacts with) 7157	APEX1	TP53	9606	9606	-	15824742	-	-	BIOGRID	APE|APE1|APEN|APEX|APX|HAP1|REF1	BCC7|LFS1|P53|TRP53	-	-	-	Low Throughput
2603879	Choi HH (2014)	116369	107842	182.819	Co-purification	physical	interacts with	-	11200 (interacts with) 1459	CHEK2	CSNK2A2	9606	9606	-	23178491	-	-	BIOGRID	CDS1|CHK2|HuCds1|LFS2|PP1425|RAD53|hCds1	CK2A2|CSNK2A1	RP11-436C9.1	-	-	Low Throughput
602485	Vinayagam A (2011)	107460	110573	83.4678	Two-hybrid	physical	interacts with	-	1026 (interacts with) 4436	CDKN1A	MSH2	9606	9606	-	21900206	-	-	BIOGRID	CAP20|CDKN1|CIP1|MDA-6|P21|SDI1|WAF1|p21CIP1	COCA1|FCC1|HNPCC|HNPCC1|LCFS2	-	-	-	High Throughput
2448201	Pankow S (2015)	107506	108258	372.594	Affinity Capture-MS	physical	interacts with	-	1080 (interacts with) 1938	CFTR	EEF2	9606	9606	-	26618866	Co-Purifying Protein Identification Technology (CoPIT)	-	BIOGRID	ABC35|ABCC7|CF|CFTR/MRP|MRP7|TNR-CFTR|dJ760C5.1	EEF-2|EF-2|EF2|SCA26	tcag7.78	-	-	High Throughput
1274625	Wan C (2015)	106575	114134	288.444	Co-fractionation	physical	interacts with	-	60 (interacts with) 8565	ACTB	YARS	9606	9606	-	26344197	Fractionation was combined with mass spectrometry from five diverse animal species to predict co-complex protein interactions conserved across metazoa using an integrative computational scoring procedure along with an SVM approach. The significant data set of 16655 PPI, was derived from a set of more than 1M interactions by examining a ROC curve of predicted interactions against reference annotat…	0.0846131	BIOGRID	BRWS1|PS1TP5BP1	CMTDIC|TYRRS|YRS|YTS	-	-	-	High Throughput
2448206	Pankow S (2015)	107506	107434	495.139	Affinity Capture-MS	physical	interacts with	-	1080 (interacts with) 999	CFTR	CDH1	9606	9606	-	26618866	Co-Purifying Protein Identification Technology (CoPIT)	-	BIOGRID	ABC35|ABCC7|CF|CFTR/MRP|MRP7|TNR-CFTR|dJ760C5.1	Arc-1|CD324|CDHE|ECAD|LCAM|UVO	tcag7.78	-	-	High Throughput
2540074	Craig A (2003)	116369	113010	430.087	Reconstituted Complex	physical	interacts with	-	11200 (interacts with) 7157	CHEK2	TP53	9606	9606	-	12897801	-	-	BIOGRID	CDS1|CHK2|HuCds1|LFS2|PP1425|RAD53|hCds1	BCC7|LFS1|P53|TRP53	RP11-436C9.1	-	-	Low Throughput
602487	Vinayagam A (2011)	107460	106782	741.273	Two-hybrid	physical	interacts with	-	1026 (interacts with) 285	CDKN1A	ANGPT2	9606	9606	-	21900206	-	-	BIOGRID	CAP20|CDKN1|CIP1|MDA-6|P21|SDI1|WAF1|p21CIP1	AGPT2|ANG2	-	-	-	High Throughput
278120	Carrero P (2000)	106825	109338	180.052	Reconstituted Complex	physical	interacts with	-	328 (interacts with) 3091	APEX1	HIF1A	9606	9606	-	10594042	-	-	BIOGRID	APE|APE1|APEN|APEX|APX|HAP1|REF1	HIF-1A|HIF-1alpha|HIF1|HIF1-ALPHA|MOP1|PASD8|bHLHe78	-	-	-	Low Throughput
2540076	Craig A (2003)	116369	107460	132.341	Biochemical Activity	physical	interacts with	Phosphorylation	11200 (interacts with) 1026	CHEK2	CDKN1A	9606	9606	-	12897801	with TP53	-	BIOGRID	CDS1|CHK2|HuCds1|LFS2|PP1425|RAD53|hCds1	CAP20|CDKN1|CIP1|MDA-6|P21|SDI1|WAF1|p21CIP1	RP11-436C9.1	-	-	Low Throughput
602475	Vinayagam A (2011)	107460	106994	144.212	Two-hybrid	physical	interacts with	-	1026 (interacts with) 506	CDKN1A	ATP5B	9606	9606	-	21900206	-	-	BIOGRID	CAP20|CDKN1|CIP1|MDA-6|P21|SDI1|WAF1|p21CIP1	ATPMB|ATPSB|HEL-S-271	-	-	-	High Throughput
2448195	Pankow S (2015)	107506	107305	677.837	Affinity Capture-MS	physical	interacts with	-	1080 (interacts with) 857	CFTR	CAV1	9606	9606	-	26618866	Co-Purifying Protein Identification Technology (CoPIT)	-	BIOGRID	ABC35|ABCC7|CF|CFTR/MRP|MRP7|TNR-CFTR|dJ760C5.1	BSCL3|CGL3|LCCNS|MSTP085|PPH3|VIP21	tcag7.78	-	-	High Throughput
2491279	Martrat G (2011)	116369	110857	85.6305	Affinity Capture-Western	physical	interacts with	-	11200 (interacts with) 4790	CHEK2	NFKB1	9606	9606	-	21466675	-	-	BIOGRID	CDS1|CHK2|HuCds1|LFS2|PP1425|RAD53|hCds1	EBP-1|KBF1|NF-kB1|NF-kappa-B|NF-kappaB|NFKB-p105|NFKB-p50|NFkappaB|p105|p50	RP11-436C9.1	-	-	Low Throughput
602480	Vinayagam A (2011)	107460	106830	499.39	Two-hybrid	physical	interacts with	-	1026 (interacts with) 333	CDKN1A	APLP1	9606	9606	-	21900206	-	-	BIOGRID	CAP20|CDKN1|CIP1|MDA-6|P21|SDI1|WAF1|p21CIP1	APLP	-	-	-	High Throughput
746431	Havugimana PC (2012)	106575	110714	364.482	Co-fractionation	physical	interacts with	-	60 (interacts with) 4629	ACTB	MYH11	9606	9606	-	22939629	Denoised score >= 0.75	0.78	BIOGRID	BRWS1|PS1TP5BP1	AAT4|FAA4|SMHC|SMMHC	-	-	-	High Throughput
545303	Ambrosino C (2010)	106575	108403	276.072	Affinity Capture-Western	physical	interacts with	-	60 (interacts with) 2099	ACTB	ESR1	9606	9606	-	20308691	-	-	BIOGRID	BRWS1|PS1TP5BP1	ER|ESR|ESRA|ESTRR|Era|NR3A1	-	RP1-130E4.1	-	Low Throughput
545310	Ambrosino C (2010)	106575	115403	138.815	Affinity Capture-Western	physical	interacts with	-	60 (interacts with) 10096	ACTB	ACTR3	9606	9606	-	20308691	-	-	BIOGRID	BRWS1|PS1TP5BP1	ARP3	-	-	-	Low Throughput
725349	Jeannotte AM (2008)	106575	112506	225.306	Affinity Capture-Western	physical	interacts with	-	60 (interacts with) 6622	ACTB	SNCA	9606	9606	-	18331289	figure 6.	-	BIOGRID	BRWS1|PS1TP5BP1	NACP|PARK1|PARK4|PD1	-	-	-	Low Throughput
602463	Vinayagam A (2011)	107460	106575	255.098	Two-hybrid	physical	interacts with	-	1026 (interacts with) 60	CDKN1A	ACTB	9606	9606	-	21900206	-	-	BIOGRID	CAP20|CDKN1|CIP1|MDA-6|P21|SDI1|WAF1|p21CIP1	BRWS1|PS1TP5BP1	-	-	-	High Throughput
2271067	Huttlin EL (2017)	109705	111343	1596.41	Affinity Capture-MS	physical	interacts with	-	3484 (interacts with) 5327	IGFBP1	PLAT	9606	9606	-	28514442	Quantitative scores are a modified CompPASS score derived from Sowa et al., Cell, 2009 (PMID 19615732). The cut-off threshold is > 0.75.	0.771667	BIOGRID	AFBP|IBP1|IGF-BP25|PP12|hIGFBP-1	T-PA|TPA	tcag7.702	-	-	High Throughput
545311	Ambrosino C (2010)	106575	115404	136.893	Affinity Capture-Western	physical	interacts with	-	60 (interacts with) 10097	ACTB	ACTR2	9606	9606	-	20308691	-	-	BIOGRID	BRWS1|PS1TP5BP1	ARP2	-	-	-	Low Throughput
2241526	Huttlin EL (2017)	106700	608805	87.5644	Affinity Capture-MS	physical	interacts with	-	197 (interacts with) 728378	AHSG	POTEF	9606	9606	-	28514442	Quantitative scores are a modified CompPASS score derived from Sowa et al., Cell, 2009 (PMID 19615732). The cut-off threshold is > 0.75.|Re-analysis of the data from the first paper, The BioPlex Network: A Systematic Exploration of the Human Interactome, PUBMED:26186194	0.989361	BIOGRID	A2HS|AHS|FETUA|HSGA	A26C1B|ACTB|POTE2alpha|POTEACTIN	PRO2743	-	-	High Throughput
1418082	Arroyo R (2015)	116369	109040	413.998	Two-hybrid	physical	interacts with	-	11200 (interacts with) 2778	CHEK2	GNAS	9606	9606	-	25640309	-	-	BIOGRID	CDS1|CHK2|HuCds1|LFS2|PP1425|RAD53|hCds1	AHO|C20orf45|GNAS1|GPSA|GSA|GSP|NESP|PHP1A|PHP1B|PHP1C|POH	RP11-436C9.1	RP4-543J19.4	-	High Throughput
601757	Vinayagam A (2011)	107285	112168	449.845	Two-hybrid	physical	interacts with	-	835 (interacts with) 6256	CASP2	RXRA	9606	9606	-	21900206	-	-	BIOGRID	CASP-2|ICH1|NEDD-2|NEDD2|PPP1R57	NR2B1	-	-	-	High Throughput
1418084	Arroyo R (2015)	116369	106790	189.608	Two-hybrid	physical	interacts with	-	11200 (interacts with) 293	CHEK2	SLC25A6	9606	9606	-	25640309	-	-	BIOGRID	CDS1|CHK2|HuCds1|LFS2|PP1425|RAD53|hCds1	2|3|AAC3|ANT|ANT 2|ANT 3|ANT3|ANT3Y	RP11-436C9.1	RP11-261P4.6	-	High Throughput
317641	Mendelsohn AR (2002)	107285	107336	322.269	Two-hybrid	physical	interacts with	-	835 (interacts with) 896	CASP2	CCND3	9606	9606	-	12011445	-	-	BIOGRID	CASP-2|ICH1|NEDD-2|NEDD2|PPP1R57	-	-	RP5-973N23.3	-	Low Throughput
2448162	Pankow S (2015)	107506	114514	280.484	Affinity Capture-MS	physical	interacts with	-	1080 (interacts with) 9052	CFTR	GPRC5A	9606	9606	-	26618866	Co-Purifying Protein Identification Technology (CoPIT)	-	BIOGRID	ABC35|ABCC7|CF|CFTR/MRP|MRP7|TNR-CFTR|dJ760C5.1	GPCR5A|PEIG-1|RAI3|RAIG1|TIG1	tcag7.78	-	-	High Throughput
2484652	Li L (2016)	112665	115330	217.744	Affinity Capture-Western	physical	interacts with	-	6789 (interacts with) 10013	STK4	HDAC6	9606	9606	-	26657153	-	-	BIOGRID	KRS2|MST1|TIIAC|YSK3	CPBHM|HD6|PPP1R90	-	JM21	-	Low Throughput
2243805	Huttlin EL (2017)	109705	109702	179.907	Affinity Capture-MS	physical	interacts with	-	3484 (interacts with) 3481	IGFBP1	IGF2	9606	9606	-	28514442	Quantitative scores are a modified CompPASS score derived from Sowa et al., Cell, 2009 (PMID 19615732). The cut-off threshold is > 0.75.	0.983864	BIOGRID	AFBP|IBP1|IGF-BP25|PP12|hIGFBP-1	C11orf43|IGF-II|PP9974	tcag7.702	PP1446	-	High Throughput
303983	Guo Y (2002)	107285	107106	117.036	Biochemical Activity	physical	interacts with	Proteolytic Processing	835 (interacts with) 637	CASP2	BID	9606	9606	-	11832478	-	-	BIOGRID	CASP-2|ICH1|NEDD-2|NEDD2|PPP1R57	FP497	-	-	-	Low Throughput
1417718	Arroyo R (2015)	116369	107447	360.645	Two-hybrid	physical	interacts with	-	11200 (interacts with) 1012	CHEK2	CDH13	9606	9606	-	25640309	-	-	BIOGRID	CDS1|CHK2|HuCds1|LFS2|PP1425|RAD53|hCds1	CDHH|P105	RP11-436C9.1	-	-	High Throughput
1417719	Arroyo R (2015)	116369	107958	384.195	Two-hybrid	physical	interacts with	-	11200 (interacts with) 1586	CHEK2	CYP17A1	9606	9606	-	25640309	-	-	BIOGRID	CDS1|CHK2|HuCds1|LFS2|PP1425|RAD53|hCds1	CPT7|CYP17|P450C17|S17AH	RP11-436C9.1	RP11-753C18.1	-	High Throughput
1437944	Mo XL (2015)	112665	116356	58.6878	FRET	physical	interacts with	-	6789 (interacts with) 11186	STK4	RASSF1	9606	9606	-	26578655	BRET	-	BIOGRID	KRS2|MST1|TIIAC|YSK3	123F2|NORE2A|RASSF1A|RDA32|REH3P21	-	-	-	Low Throughput
2329555	Boldt K (2016)	112665	114023	77.053	Affinity Capture-MS	physical	interacts with	-	6789 (interacts with) 8445	STK4	DYRK2	9606	9606	-	27173435	-	-	BIOGRID	KRS2|MST1|TIIAC|YSK3	-	-	-	-	High Throughput
1272779	Wan C (2015)	112665	112664	54.4005	Co-fractionation	physical	interacts with	-	6789 (interacts with) 6788	STK4	STK3	9606	9606	-	26344197	Fractionation was combined with mass spectrometry from five diverse animal species to predict co-complex protein interactions conserved across metazoa using an integrative computational scoring procedure along with an SVM approach. The significant data set of 16655 PPI, was derived from a set of more than 1M interactions by examining a ROC curve of predicted interactions against reference annotat…	1	BIOGRID	KRS2|MST1|TIIAC|YSK3	KRS1|MST2	-	-	-	High Throughput
729739	Inoue Y (2007)	116369	111860	141.004	Affinity Capture-Western	physical	interacts with	-	11200 (interacts with) 5925	CHEK2	RB1	9606	9606	-	17380128	-	-	BIOGRID	CDS1|CHK2|HuCds1|LFS2|PP1425|RAD53|hCds1	OSRC|PPP1R130|RB|p105-Rb|pRb|pp110	RP11-436C9.1	RP11-174I10.1	-	Low Throughput
1240781	Hauri S (2013)	112665	106798	110.543	Affinity Capture-MS	physical	interacts with	-	6789 (interacts with) 301	STK4	ANXA1	9606	9606	-	24366813	-	-	BIOGRID	KRS2|MST1|TIIAC|YSK3	ANX1|LPC1	-	RP11-71A24.1	-	High Throughput
739608	Olah J (2011)	116369	106848	847.611	Reconstituted Complex	physical	interacts with	-	11200 (interacts with) 351	CHEK2	APP	9606	9606	-	21832049	-	-	BIOGRID	CDS1|CHK2|HuCds1|LFS2|PP1425|RAD53|hCds1	AAA|ABETA|ABPP|AD1|APPI|CTFgamma|CVAP|PN-II|PN2	RP11-436C9.1	-	-	High Throughput
2448151	Pankow S (2015)	107506	109316	473.17	Affinity Capture-MS	physical	interacts with	-	1080 (interacts with) 3066	CFTR	HDAC2	9606	9606	-	26618866	Co-Purifying Protein Identification Technology (CoPIT)	-	BIOGRID	ABC35|ABCC7|CF|CFTR/MRP|MRP7|TNR-CFTR|dJ760C5.1	HD2|RPD3|YAF1	tcag7.78	-	-	High Throughput
282337	Huang S (2003)	107460	110381	199.805	Affinity Capture-Western	physical	interacts with	-	1026 (interacts with) 4217	CDKN1A	MAP3K5	9606	9606	-	12820963	-	-	BIOGRID	CAP20|CDKN1|CIP1|MDA-6|P21|SDI1|WAF1|p21CIP1	ASK1|MAPKKK5|MEKK5	-	RP3-325F22.4	-	Low Throughput
2448137	Pankow S (2015)	107506	112290	235.593	Affinity Capture-MS	physical	interacts with	-	1080 (interacts with) 6389	CFTR	SDHA	9606	9606	-	26618866	Co-Purifying Protein Identification Technology (CoPIT)	-	BIOGRID	ABC35|ABCC7|CF|CFTR/MRP|MRP7|TNR-CFTR|dJ760C5.1	CMD1GG|FP|PGL5|SDH1|SDH2|SDHF	tcag7.78	-	-	High Throughput
715635	Yang S (2002)	116369	111384	120.786	Affinity Capture-Western	physical	interacts with	-	11200 (interacts with) 5371	CHEK2	PML	9606	9606	-	12402044	-	-	BIOGRID	CDS1|CHK2|HuCds1|LFS2|PP1425|RAD53|hCds1	MYL|PP8675|RNF71|TRIM19	RP11-436C9.1	-	-	Low Throughput
269422	Stelzl U (2005)	107460	122970	288.642	Two-hybrid	physical	interacts with	-	1026 (interacts with) 79885	CDKN1A	HDAC11	9606	9606	-	16169070	-	1	BIOGRID	CAP20|CDKN1|CIP1|MDA-6|P21|SDI1|WAF1|p21CIP1	HD11	-	-	-	High Throughput
483919	Garcia-Wilson E (2005)	107460	115330	172.263	Reconstituted Complex	physical	interacts with	-	1026 (interacts with) 10013	CDKN1A	HDAC6	9606	9606	-	16082198	-	-	BIOGRID	CAP20|CDKN1|CIP1|MDA-6|P21|SDI1|WAF1|p21CIP1	CPBHM|HD6|PPP1R90	-	JM21	-	Low Throughput
645338	Dozier C (2004)	116369	111520	198.954	Reconstituted Complex	physical	interacts with	-	11200 (interacts with) 5528	CHEK2	PPP2R5D	9606	9606	-	15380617	-	-	BIOGRID	CDS1|CHK2|HuCds1|LFS2|PP1425|RAD53|hCds1	B56D	RP11-436C9.1	-	-	Low Throughput
483918	Garcia-Wilson E (2005)	107460	115106	110.445	Reconstituted Complex	physical	interacts with	-	1026 (interacts with) 9759	CDKN1A	HDAC4	9606	9606	-	16082198	-	-	BIOGRID	CAP20|CDKN1|CIP1|MDA-6|P21|SDI1|WAF1|p21CIP1	AHO3|BDMR|HA6116|HD4|HDAC-4|HDAC-A|HDACA	-	-	-	Low Throughput
668850	Hu C (2012)	116369	115457	179.813	Affinity Capture-Western	physical	interacts with	-	11200 (interacts with) 10155	CHEK2	TRIM28	9606	9606	-	22496453	figure 3F.	-	BIOGRID	CDS1|CHK2|HuCds1|LFS2|PP1425|RAD53|hCds1	KAP1|PPP1R157|RNF96|TF1B|TIF1B	RP11-436C9.1	-	-	Low Throughput
483921	Garcia-Wilson E (2005)	107460	109316	137.126	Reconstituted Complex	physical	interacts with	-	1026 (interacts with) 3066	CDKN1A	HDAC2	9606	9606	-	16082198	-	-	BIOGRID	CAP20|CDKN1|CIP1|MDA-6|P21|SDI1|WAF1|p21CIP1	HD2|RPD3|YAF1	-	-	-	Low Throughput
2448129	Pankow S (2015)	107506	115457	510.296	Affinity Capture-MS	physical	interacts with	-	1080 (interacts with) 10155	CFTR	TRIM28	9606	9606	-	26618866	Co-Purifying Protein Identification Technology (CoPIT)	-	BIOGRID	ABC35|ABCC7|CF|CFTR/MRP|MRP7|TNR-CFTR|dJ760C5.1	KAP1|PPP1R157|RNF96|TF1B|TIF1B	tcag7.78	-	-	High Throughput
869919	Cinar B (2007)	112665	106710	281.995	Reconstituted Complex	physical	interacts with	-	6789 (interacts with) 207	STK4	AKT1	9606	9606	-	17932490	-	-	BIOGRID	KRS2|MST1|TIIAC|YSK3	AKT|CWS6|PKB|PKB-ALPHA|PRKBA|RAC|RAC-ALPHA	-	-	-	Low Throughput
913913	Couzens AL (2013)	112665	114646	86.6741	Affinity Capture-MS	physical	interacts with	-	6789 (interacts with) 9212	STK4	AURKB	9606	9606	-	24255178	-	0.96	BIOGRID	KRS2|MST1|TIIAC|YSK3	AIK2|AIM-1|AIM1|ARK2|AurB|IPL1|PPP1R48|STK12|STK5|aurkb-sv1|aurkb-sv2	-	-	-	High Throughput
279262	Brown KD (2003)	116369	110573	73.5108	Affinity Capture-Western	physical	interacts with	-	11200 (interacts with) 4436	CHEK2	MSH2	9606	9606	-	12447371	-	-	BIOGRID	CDS1|CHK2|HuCds1|LFS2|PP1425|RAD53|hCds1	COCA1|FCC1|HNPCC|HNPCC1|LCFS2	RP11-436C9.1	-	-	Low Throughput
544885	Yuan F (2011)	112665	116983	140.327	Biochemical Activity	physical	interacts with	Phosphorylation	6789 (interacts with) 23411	STK4	SIRT1	9606	9606	-	21212262	-	-	BIOGRID	KRS2|MST1|TIIAC|YSK3	SIR2L1	-	RP11-57G10.3	-	Low Throughput
557234	Xiao L (2011)	112665	106543	179.983	Affinity Capture-Western	physical	interacts with	-	6789 (interacts with) 25	STK4	ABL1	9606	9606	-	21715626	-	-	BIOGRID	KRS2|MST1|TIIAC|YSK3	ABL|JTK7|bcr/abl|c-ABL|c-ABL1|p150|v-abl	-	RP11-83J21.1	-	Low Throughput
557235	Xiao L (2011)	112665	108598	68.6508	Affinity Capture-Western	physical	interacts with	-	6789 (interacts with) 2309	STK4	FOXO3	9606	9606	-	21715626	-	-	BIOGRID	KRS2|MST1|TIIAC|YSK3	AF6q21|FKHRL1|FKHRL1P2|FOXO2|FOXO3A	-	-	-	Low Throughput
557499	Wen W (2010)	112665	109268	150.416	Affinity Capture-Western	physical	interacts with	-	6789 (interacts with) 3014	STK4	H2AFX	9606	9606	-	20921231	-	-	BIOGRID	KRS2|MST1|TIIAC|YSK3	H2A.X|H2A/X|H2AX	-	-	-	Low Throughput
1505000	Chen TC (2014)	112664	107286	192.464	Co-localization	physical	interacts with	-	6788 (interacts with) 836	STK3	CASP3	9606	9606	-	25241761	in situ PLA	-	BIOGRID	KRS1|MST2	CPP32|CPP32B|SCA-1	-	-	-	High Throughput
1240800	Hauri S (2013)	112664	116356	90.5671	Affinity Capture-MS	physical	interacts with	-	6788 (interacts with) 11186	STK3	RASSF1	9606	9606	-	24366813	-	-	BIOGRID	KRS1|MST2	123F2|NORE2A|RASSF1A|RDA32|REH3P21	-	-	-	High Throughput
2375950	Wang J (2012)	107536	107070	160.34	Biochemical Activity	physical	interacts with	Phosphorylation	1111 (interacts with) 598	CHEK1	BCL2L1	9606	9606	-	22617334	-	-	BIOGRID	CHK1	BCL-XL/S|BCL2L|BCLX|BCLXL|BCLXS|Bcl-X|PPP1R52|bcl-xL|bcl-xS	-	RP5-857M17.3	-	Low Throughput
891856	Wang J (2011)	122449	112531	1738	Two-hybrid	physical	interacts with	-	66002 (interacts with) 6648	CYP4F12	SOD2	9606	9606	-	21988832	-	-	BIOGRID	CYPIVF12|F22329_1	IPOB|MNSOD|MVCD6	UNQ568/PRO1129	RP1-56L9.2	-	High Throughput
870300	Kim D (2010)	112664	106710	463.515	Affinity Capture-Western	physical	interacts with	-	6788 (interacts with) 207	STK3	AKT1	9606	9606	-	20231902	-	-	BIOGRID	KRS1|MST2	AKT|CWS6|PKB|PKB-ALPHA|PRKBA|RAC|RAC-ALPHA	-	-	-	Low Throughput
2448094	Pankow S (2015)	107506	114579	345.748	Affinity Capture-MS	physical	interacts with	-	1080 (interacts with) 9131	CFTR	AIFM1	9606	9606	-	26618866	Co-Purifying Protein Identification Technology (CoPIT)	-	BIOGRID	ABC35|ABCC7|CF|CFTR/MRP|MRP7|TNR-CFTR|dJ760C5.1	AIF|CMT2D|CMTX4|COWCK|COXPD6|NADMR|NAMSD|PDCD8	tcag7.78	RP3-438D16.2	-	High Throughput
913886	Couzens AL (2013)	112664	114646	138.984	Affinity Capture-MS	physical	interacts with	-	6788 (interacts with) 9212	STK3	AURKB	9606	9606	-	24255178	-	0.93	BIOGRID	KRS1|MST2	AIK2|AIM-1|AIM1|ARK2|AurB|IPL1|PPP1R48|STK12|STK5|aurkb-sv1|aurkb-sv2	-	-	-	High Throughput
722867	Kumar A (2010)	112664	108293	79.3485	Biochemical Activity	physical	interacts with	Phosphorylation	6788 (interacts with) 1978	STK3	EIF4EBP1	9606	9606	-	20090955	figure 3.	-	BIOGRID	KRS1|MST2	4E-BP1|4EBP1|BP-1|PHAS-I	-	-	-	Low Throughput
858019	Romano D (2010)	112664	111831	199.131	Affinity Capture-Western	physical	interacts with	-	6788 (interacts with) 5894	STK3	RAF1	9606	9606	-	20086174	-	-	BIOGRID	KRS1|MST2	CMD1NN|CRAF|NS5|Raf-1|c-Raf	-	-	-	Low Throughput
2534864	Wang F (2008)	108598	113010	288.2	Reconstituted Complex	physical	interacts with	-	2309 (interacts with) 7157	FOXO3	TP53	9606	9606	-	18824006	-	-	BIOGRID	AF6q21|FKHRL1|FKHRL1P2|FOXO2|FOXO3A	BCC7|LFS1|P53|TRP53	-	-	-	Low Throughput
1514754	Hu C (2015)	108598	112874	121.922	Affinity Capture-Western	physical	interacts with	-	2309 (interacts with) 7015	FOXO3	TERT	9606	9606	-	26370108	Figure 5	-	BIOGRID	AF6q21|FKHRL1|FKHRL1P2|FOXO2|FOXO3A	CMM9|DKCA2|DKCB4|EST2|PFBMFT1|TCS1|TP2|TRT|hEST2|hTRT	-	-	-	Low Throughput
1509888	Li X (2015)	108598	111860	98.8764	Affinity Capture-MS	physical	interacts with	-	2309 (interacts with) 5925	FOXO3	RB1	9606	9606	-	25609649	-	-	BIOGRID	AF6q21|FKHRL1|FKHRL1P2|FOXO2|FOXO3A	OSRC|PPP1R130|RB|p105-Rb|pRb|pp110	-	RP11-174I10.1	-	High Throughput
2448055	Pankow S (2015)	107506	109153	377.515	Affinity Capture-MS	physical	interacts with	-	1080 (interacts with) 2896	CFTR	GRN	9606	9606	-	26618866	Co-Purifying Protein Identification Technology (CoPIT)	-	BIOGRID	ABC35|ABCC7|CF|CFTR/MRP|MRP7|TNR-CFTR|dJ760C5.1	CLN11|GEP|GP88|PCDGF|PEPI|PGRN	tcag7.78	-	-	High Throughput
2448061	Pankow S (2015)	107506	111792	354.082	Affinity Capture-MS	physical	interacts with	-	1080 (interacts with) 5834	CFTR	PYGB	9606	9606	-	26618866	Co-Purifying Protein Identification Technology (CoPIT)	-	BIOGRID	ABC35|ABCC7|CF|CFTR/MRP|MRP7|TNR-CFTR|dJ760C5.1	GPBB	tcag7.78	RP5-965G21.1	-	High Throughput
738477	Olah J (2011)	107536	106848	882.647	Reconstituted Complex	physical	interacts with	-	1111 (interacts with) 351	CHEK1	APP	9606	9606	-	21832049	-	-	BIOGRID	CHK1	AAA|ABETA|ABPP|AD1|APPI|CTFgamma|CVAP|PN-II|PN2	-	-	-	High Throughput
795807	Rocha S (2005)	107536	111902	275.596	Biochemical Activity	physical	interacts with	Phosphorylation	1111 (interacts with) 5970	CHEK1	RELA	9606	9606	-	15775976	-	-	BIOGRID	CHK1	NFKB3|p65	-	-	-	Low Throughput
604694	Shieh SY (2000)	107536	113010	641.936	Biochemical Activity	physical	interacts with	Phosphorylation	1111 (interacts with) 7157	CHEK1	TP53	9606	9606	-	10673501	-	-	BIOGRID	CHK1	BCC7|LFS1|P53|TRP53	-	-	-	Low Throughput
729737	Inoue Y (2007)	107536	111860	217.819	Reconstituted Complex	physical	interacts with	-	1111 (interacts with) 5925	CHEK1	RB1	9606	9606	-	17380128	-	-	BIOGRID	CHK1	OSRC|PPP1R130|RB|p105-Rb|pRb|pp110	-	RP11-174I10.1	-	Low Throughput
685384	Yang JY (2008)	108598	111580	113.449	Affinity Capture-Western	physical	interacts with	-	2309 (interacts with) 5594	FOXO3	MAPK1	9606	9606	-	18204439	-	-	BIOGRID	AF6q21|FKHRL1|FKHRL1P2|FOXO2|FOXO3A	ERK|ERK-2|ERK2|ERT1|MAPK2|P42MAPK|PRKM1|PRKM2|p38|p40|p41|p41mapk|p42-MAPK	-	-	-	Low Throughput
716076	Hu MC (2004)	108598	107569	88.4569	Reconstituted Complex	physical	interacts with	-	2309 (interacts with) 1147	FOXO3	CHUK	9606	9606	-	15084260	-	-	BIOGRID	AF6q21|FKHRL1|FKHRL1P2|FOXO2|FOXO3A	IKBKA|IKK-alpha|IKK1|IKKA|NFKBIKA|TCF16	-	-	-	Low Throughput
505208	Tsai WB (2008)	108598	106962	79.0174	Reconstituted Complex	physical	interacts with	-	2309 (interacts with) 472	FOXO3	ATM	9606	9606	-	18344987	-	-	BIOGRID	AF6q21|FKHRL1|FKHRL1P2|FOXO2|FOXO3A	AT1|ATA|ATC|ATD|ATDC|ATE|TEL1|TELO1	-	-	-	Low Throughput
615692	Fu G (2011)	108598	110263	139.925	Affinity Capture-Western	physical	interacts with	-	2309 (interacts with) 4088	FOXO3	SMAD3	9606	9606	-	21532621	-	-	BIOGRID	AF6q21|FKHRL1|FKHRL1P2|FOXO2|FOXO3A	HSPC193|HsT17436|JV15-2|LDS1C|LDS3|MADH3	-	-	-	Low Throughput
463154	Essers MA (2005)	108598	107880	155.262	Affinity Capture-Western	physical	interacts with	-	2309 (interacts with) 1499	FOXO3	CTNNB1	9606	9606	-	15905404	-	-	BIOGRID	AF6q21|FKHRL1|FKHRL1P2|FOXO2|FOXO3A	CTNNB|MRD19|armadillo	-	OK/SW-cl.35	-	Low Throughput
505196	Tsai WB (2008)	108598	109268	99.5424	Affinity Capture-Western	physical	interacts with	-	2309 (interacts with) 3014	FOXO3	H2AFX	9606	9606	-	18344987	-	-	BIOGRID	AF6q21|FKHRL1|FKHRL1P2|FOXO2|FOXO3A	H2A.X|H2A/X|H2AX	-	-	-	Low Throughput
244058	Kristensen LP (2004)	107536	107841	244.732	Reconstituted Complex	physical	interacts with	-	1111 (interacts with) 1457	CHEK1	CSNK2A1	9606	9606	-	15225637	Chk1 specifically phosphorylates in vitro the regulatory beta-subunit of CK2. Chymotryptic peptides and mutational analyses have revealed that CK2beta is phosphorylated at Thr213	-	BIOGRID	CHK1	CK2A1|CKII|CSNK2A3	-	-	-	Low Throughput
2448034	Pankow S (2015)	107506	110187	327.151	Affinity Capture-MS	physical	interacts with	-	1080 (interacts with) 4001	CFTR	LMNB1	9606	9606	-	26618866	Co-Purifying Protein Identification Technology (CoPIT)	-	BIOGRID	ABC35|ABCC7|CF|CFTR/MRP|MRP7|TNR-CFTR|dJ760C5.1	ADLD|LMN|LMN2|LMNB	tcag7.78	-	-	High Throughput
2448031	Pankow S (2015)	107506	110186	1228.85	Affinity Capture-MS	physical	interacts with	-	1080 (interacts with) 4000	CFTR	LMNA	9606	9606	-	26618866	Co-Purifying Protein Identification Technology (CoPIT)	-	BIOGRID	ABC35|ABCC7|CF|CFTR/MRP|MRP7|TNR-CFTR|dJ760C5.1	CDCD1|CDDC|CMD1A|CMT2B1|EMD2|FPL|FPLD|FPLD2|HGPS|IDC|LDP1|LFP|LGMD1B|LMN1|LMNC|LMNL1|PRO1	tcag7.78	RP11-54H19.1	-	High Throughput
244795	Tian H (2002)	107536	107460	156.517	Affinity Capture-Western	physical	interacts with	-	1111 (interacts with) 1026	CHEK1	CDKN1A	9606	9606	-	11896572	Radiation-induced phosphorylation of Chk1 at S345 was associated with binding of Chk1 to p53, p21, and 14-3-3 sigma, and that UCN-01 inhibited S345 phosphorylation	-	BIOGRID	CHK1	CAP20|CDKN1|CIP1|MDA-6|P21|SDI1|WAF1|p21CIP1	-	-	-	Low Throughput
446133	Behrends C (2010)	108598	108578	66.2633	Affinity Capture-MS	physical	interacts with	-	2309 (interacts with) 2288	FOXO3	FKBP4	9606	9606	-	20562859	Exogenous expression of bait	-	BIOGRID	AF6q21|FKHRL1|FKHRL1P2|FOXO2|FOXO3A	FKBP51|FKBP52|FKBP59|HBI|Hsp56|PPIase|p52	-	-	-	High Throughput
1022652	Yang H (2005)	110449	106710	356.804	Reconstituted Complex	physical	interacts with	-	4303 (interacts with) 207	FOXO4	AKT1	9606	9606	-	15688030	-	-	BIOGRID	AFX|AFX1|MLLT7	AKT|CWS6|PKB|PKB-ALPHA|PRKBA|RAC|RAC-ALPHA	-	-	-	Low Throughput
922598	Kristensen AR (2012)	115425	110187	121.771	Co-fractionation	physical	interacts with	-	10121 (interacts with) 4001	ACTR1A	LMNB1	9606	9606	-	22863883	-	-	BIOGRID	ARP1|CTRN1	ADLD|LMN|LMN2|LMNB	-	-	-	High Throughput
463153	Essers MA (2005)	110449	107880	459.703	Affinity Capture-Western	physical	interacts with	-	4303 (interacts with) 1499	FOXO4	CTNNB1	9606	9606	-	15905404	-	-	BIOGRID	AFX|AFX1|MLLT7	CTNNB|MRD19|armadillo	-	OK/SW-cl.35	-	Low Throughput
513739	van der Horst A (2004)	110449	116983	142.799	Affinity Capture-Western	physical	interacts with	-	4303 (interacts with) 23411	FOXO4	SIRT1	9606	9606	-	15126506	-	-	BIOGRID	AFX|AFX1|MLLT7	SIR2L1	-	RP11-57G10.3	-	Low Throughput
746461	Havugimana PC (2012)	115425	110712	308.297	Co-fractionation	physical	interacts with	-	10121 (interacts with) 4627	ACTR1A	MYH9	9606	9606	-	22939629	Denoised score >= 0.75	0.771	BIOGRID	ARP1|CTRN1	BDPLT6|DFNA17|EPSTS|FTNS|MHA|NMHC-II-A|NMMHC-IIA|NMMHCA	-	RP1-68O2.1	-	High Throughput
321903	Brenkman AB (2008)	110449	111317	140.979	Affinity Capture-Western	physical	interacts with	-	4303 (interacts with) 5300	FOXO4	PIN1	9606	9606	-	18794148	-	-	BIOGRID	AFX|AFX1|MLLT7	DOD|UBL5	-	-	-	Low Throughput
859437	Batsche E (1998)	111860	112878	124.842	Affinity Capture-Western	physical	interacts with	-	5925 (interacts with) 7020	RB1	TFAP2A	9606	9606	-	9632747	-	-	BIOGRID	OSRC|PPP1R130|RB|p105-Rb|pRb|pp110	AP-2|AP-2alpha|AP2TF|BOFS|TFAP2	RP11-174I10.1	RP1-290I10.1	-	Low Throughput
854359	Li H (2001)	111860	111585	135.221	Affinity Capture-Western	physical	interacts with	-	5925 (interacts with) 5599	RB1	MAPK8	9606	9606	-	11566021	-	-	BIOGRID	OSRC|PPP1R130|RB|p105-Rb|pRb|pp110	JNK|JNK-46|JNK1|JNK1A2|JNK21B1/2|PRKM8|SAPK1|SAPK1c	RP11-174I10.1	-	-	Low Throughput
869830	Nakanishi M (1999)	111860	107460	109.024	Reconstituted Complex	physical	interacts with	-	5925 (interacts with) 1026	RB1	CDKN1A	9606	9606	-	10486249	-	-	BIOGRID	OSRC|PPP1R130|RB|p105-Rb|pRb|pp110	CAP20|CDKN1|CIP1|MDA-6|P21|SDI1|WAF1|p21CIP1	RP11-174I10.1	-	-	Low Throughput
823580	Ianari A (2009)	111860	125732	411.723	Co-localization	physical	interacts with	-	5925 (interacts with) 121504	RB1	HIST4H4	9606	9606	-	19249677	figure 2. ChIP and re-ChIP.	-	BIOGRID	OSRC|PPP1R130|RB|p105-Rb|pRb|pp110	H4/p	RP11-174I10.1	-	-	Low Throughput
820446	Radulescu RT (1995)	111860	109842	426.358	Co-purification	physical	interacts with	-	5925 (interacts with) 3630	RB1	INS	9606	9606	-	7818556	-	-	BIOGRID	OSRC|PPP1R130|RB|p105-Rb|pRb|pp110	IDDM|IDDM1|IDDM2|ILPR|IRDN|MODY10	RP11-174I10.1	-	-	Low Throughput
2447996	Pankow S (2015)	107506	106803	429.608	Affinity Capture-MS	physical	interacts with	-	1080 (interacts with) 306	CFTR	ANXA3	9606	9606	-	26618866	Co-Purifying Protein Identification Technology (CoPIT)	-	BIOGRID	ABC35|ABCC7|CF|CFTR/MRP|MRP7|TNR-CFTR|dJ760C5.1	ANX3	tcag7.78	-	-	High Throughput
304591	Ge NL (1998)	111860	106898	125.481	Affinity Capture-Western	physical	interacts with	-	5925 (interacts with) 405	RB1	ARNT	9606	9606	-	9712901	-	-	BIOGRID	OSRC|PPP1R130|RB|p105-Rb|pRb|pp110	HIF-1-beta|HIF-1beta|HIF1-beta|HIF1B|HIF1BETA|TANGO|bHLHe2	RP11-174I10.1	-	-	Low Throughput
737834	Olah J (2011)	109303	106848	1769.65	Reconstituted Complex	physical	interacts with	-	3053 (interacts with) 351	SERPIND1	APP	9606	9606	-	21832049	-	-	BIOGRID	D22S673|HC2|HCF2|HCII|HLS2|LS2|THPH10	AAA|ABETA|ABPP|AD1|APPI|CTFgamma|CVAP|PN-II|PN2	-	-	-	High Throughput
470725	Gamble SC (2007)	111860	106862	122.967	Affinity Capture-Western	physical	interacts with	-	5925 (interacts with) 367	RB1	AR	9606	9606	-	16964284	-	-	BIOGRID	OSRC|PPP1R130|RB|p105-Rb|pRb|pp110	AIS|DHTR|HUMARA|HYSP1|KD|NR3C4|SBMA|SMAX1|TFM	RP11-174I10.1	RP11-383C12.1	-	Low Throughput
857936	Ho DT (2003)	111591	111580	225.595	Biochemical Activity	physical	interacts with	Phosphorylation	5605 (interacts with) 5594	MAP2K2	MAPK1	9606	9606	-	12788955	-	-	BIOGRID	CFC4|MAPKK2|MEK2|MKK2|PRKMK2	ERK|ERK-2|ERK2|ERT1|MAPK2|P42MAPK|PRKM1|PRKM2|p38|p40|p41|p41mapk|p42-MAPK	-	-	-	Low Throughput
504571	Barre B (2005)	111860	112651	219.636	Co-localization	physical	interacts with	-	5925 (interacts with) 6774	RB1	STAT3	9606	9606	-	15677471	ChIP	-	BIOGRID	OSRC|PPP1R130|RB|p105-Rb|pRb|pp110	ADMIO|APRF|HIES	RP11-174I10.1	-	-	Low Throughput
275248	Alcalay M (1998)	111860	111384	91.425	Reconstituted Complex	physical	interacts with	-	5925 (interacts with) 5371	RB1	PML	9606	9606	-	9448006	-	-	BIOGRID	OSRC|PPP1R130|RB|p105-Rb|pRb|pp110	MYL|PP8675|RNF71|TRIM19	RP11-174I10.1	-	-	Low Throughput
263778	Chan SW (2001)	111860	113264	126.672	Reconstituted Complex	physical	interacts with	-	5925 (interacts with) 7421	RB1	VDR	9606	9606	-	11358960	-	-	BIOGRID	OSRC|PPP1R130|RB|p105-Rb|pRb|pp110	NR1I1|PPP1R163	RP11-174I10.1	-	-	Low Throughput
304573	Wu L (2001)	111860	110474	220.924	Reconstituted Complex	physical	interacts with	-	5925 (interacts with) 4331	RB1	MNAT1	9606	9606	-	11113200	-	-	BIOGRID	OSRC|PPP1R130|RB|p105-Rb|pRb|pp110	CAP35|MAT1|RNF66|TFB3	RP11-174I10.1	-	-	Low Throughput
2447971	Pankow S (2015)	107506	115670	247.555	Affinity Capture-MS	physical	interacts with	-	1080 (interacts with) 10398	CFTR	MYL9	9606	9606	-	26618866	Co-Purifying Protein Identification Technology (CoPIT)	-	BIOGRID	ABC35|ABCC7|CF|CFTR/MRP|MRP7|TNR-CFTR|dJ760C5.1	LC20|MLC-2C|MLC2|MRLC1|MYRL2	tcag7.78	RP5-977B1.9	-	High Throughput
2472501	Rosenbluh J (2016)	107880	109079	443.91	Affinity Capture-MS	physical	interacts with	-	1499 (interacts with) 2817	CTNNB1	GPC1	9606	9606	-	27684187	High-credibility protein interactions were identified using draft-PPI and a method for protein interaction credibility scoring (ICS).	-	BIOGRID	CTNNB|MRD19|armadillo	glypican	OK/SW-cl.35	-	-	High Throughput
1438429	Yu H (2011)	107607	112611	413.694	Two-hybrid	physical	interacts with	-	1196 (interacts with) 6733	CLK2	SRPK2	9606	9606	-	21516116	-	-	BIOGRID	-	SFRSK2	-	-	-	High Throughput
1438428	Yu H (2011)	107607	107609	173.287	Two-hybrid	physical	interacts with	-	1196 (interacts with) 1198	CLK2	CLK3	9606	9606	-	21516116	-	-	BIOGRID	-	PHCLK3|PHCLK3/152	-	-	-	High Throughput
2447940	Pankow S (2015)	107506	108276	1738.57	Affinity Capture-MS	physical	interacts with	-	1080 (interacts with) 1956	CFTR	EGFR	9606	9606	-	26618866	Co-Purifying Protein Identification Technology (CoPIT)	-	BIOGRID	ABC35|ABCC7|CF|CFTR/MRP|MRP7|TNR-CFTR|dJ760C5.1	ERBB|ERBB1|HER1|NISBD2|PIG61|mENA	tcag7.78	-	-	High Throughput
2472496	Rosenbluh J (2016)	107880	110725	138.517	Affinity Capture-MS	physical	interacts with	-	1499 (interacts with) 4641	CTNNB1	MYO1C	9606	9606	-	27684187	High-credibility protein interactions were identified using draft-PPI and a method for protein interaction credibility scoring (ICS).	-	BIOGRID	CTNNB|MRD19|armadillo	MMI-beta|MMIb|NMI|myr2	OK/SW-cl.35	-	-	High Throughput
2447941	Pankow S (2015)	107506	108757	449.894	Affinity Capture-MS	physical	interacts with	-	1080 (interacts with) 2475	CFTR	MTOR	9606	9606	-	26618866	Co-Purifying Protein Identification Technology (CoPIT)	-	BIOGRID	ABC35|ABCC7|CF|CFTR/MRP|MRP7|TNR-CFTR|dJ760C5.1	FRAP|FRAP1|FRAP2|RAFT1|RAPT1	tcag7.78	-	-	High Throughput
2225455	Huttlin EL (2017)	107607	107606	115.57	Affinity Capture-MS	physical	interacts with	-	1196 (interacts with) 1195	CLK2	CLK1	9606	9606	-	28514442	Quantitative scores are a modified CompPASS score derived from Sowa et al., Cell, 2009 (PMID 19615732). The cut-off threshold is > 0.75.	0.99995	BIOGRID	-	CLK|CLK/STY|STY	-	-	-	High Throughput
2447939	Pankow S (2015)	107506	115425	317.853	Affinity Capture-MS	physical	interacts with	-	1080 (interacts with) 10121	CFTR	ACTR1A	9606	9606	-	26618866	Co-Purifying Protein Identification Technology (CoPIT)	-	BIOGRID	ABC35|ABCC7|CF|CFTR/MRP|MRP7|TNR-CFTR|dJ760C5.1	ARP1|CTRN1	tcag7.78	-	-	High Throughput
2472487	Rosenbluh J (2016)	107880	106987	118.206	Affinity Capture-MS	physical	interacts with	-	1499 (interacts with) 498	CTNNB1	ATP5A1	9606	9606	-	27684187	High-credibility protein interactions were identified using draft-PPI and a method for protein interaction credibility scoring (ICS).	-	BIOGRID	CTNNB|MRD19|armadillo	ATP5A|ATP5AL2|ATPM|COXPD22|HEL-S-123m|MC5DN4|MOM2|OMR|ORM|hATP1	OK/SW-cl.35	-	-	High Throughput
2447927	Pankow S (2015)	107506	111577	544.999	Affinity Capture-MS	physical	interacts with	-	1080 (interacts with) 5591	CFTR	PRKDC	9606	9606	-	26618866	Co-Purifying Protein Identification Technology (CoPIT)	-	BIOGRID	ABC35|ABCC7|CF|CFTR/MRP|MRP7|TNR-CFTR|dJ760C5.1	DNA-PKcs|DNAPK|DNPK1|HYRC|HYRC1|IMD26|XRCC7|p350	tcag7.78	-	-	High Throughput
2447930	Pankow S (2015)	107506	113010	1930.77	Affinity Capture-MS	physical	interacts with	-	1080 (interacts with) 7157	CFTR	TP53	9606	9606	-	26618866	Co-Purifying Protein Identification Technology (CoPIT)	-	BIOGRID	ABC35|ABCC7|CF|CFTR/MRP|MRP7|TNR-CFTR|dJ760C5.1	BCC7|LFS1|P53|TRP53	tcag7.78	-	-	High Throughput
2229870	Huttlin EL (2017)	109517	113006	3472	Affinity Capture-MS	physical	interacts with	-	3284 (interacts with) 7153	HSD3B2	TOP2A	9606	9606	-	28514442	Quantitative scores are a modified CompPASS score derived from Sowa et al., Cell, 2009 (PMID 19615732). The cut-off threshold is > 0.75.	0.999583	BIOGRID	HSD3B|HSDB|SDR11E2	TOP2|TP2A	RP5-871G17.2	-	-	High Throughput
2216861	Huttlin EL (2017)	109517	109516	1738	Affinity Capture-MS	physical	interacts with	-	3284 (interacts with) 3283	HSD3B2	HSD3B1	9606	9606	-	28514442	Quantitative scores are a modified CompPASS score derived from Sowa et al., Cell, 2009 (PMID 19615732). The cut-off threshold is > 0.75.	1	BIOGRID	HSD3B|HSDB|SDR11E2	3BETAHSD|HSD3B|HSDB3|HSDB3A|I|SDR11E1	RP5-871G17.2	RP5-920G3.4	-	High Throughput
2447922	Pankow S (2015)	107506	111332	443.613	Affinity Capture-MS	physical	interacts with	-	1080 (interacts with) 5315	CFTR	PKM	9606	9606	-	26618866	Co-Purifying Protein Identification Technology (CoPIT)	-	BIOGRID	ABC35|ABCC7|CF|CFTR/MRP|MRP7|TNR-CFTR|dJ760C5.1	CTHBP|HEL-S-30|OIP3|PK3|PKM2|TCB|THBP1	tcag7.78	-	-	High Throughput
1037594	Rolland T (2014)	107607	108218	317.032	Two-hybrid	physical	interacts with	-	1196 (interacts with) 1889	CLK2	ECE1	9606	9606	-	25416956	-	-	BIOGRID	-	ECE	-	RP3-329E20.1	-	High Throughput
906876	Varjosalo M (2013)	107607	123545	163.627	Affinity Capture-MS	physical	interacts with	-	1196 (interacts with) 81608	CLK2	FIP1L1	9606	9606	-	23602568	Exogenous expresssion of bait	-	BIOGRID	-	FIP1|Rhe|hFip1	-	-	-	High Throughput
858689	Nam SY (2010)	107607	106710	1245.43	Affinity Capture-Western	physical	interacts with	-	1196 (interacts with) 207	CLK2	AKT1	9606	9606	-	20682768	-	-	BIOGRID	-	AKT|CWS6|PKB|PKB-ALPHA|PRKBA|RAC|RAC-ALPHA	-	-	-	Low Throughput
2532454	Jin S (2000)	107420	108014	108.352	Reconstituted Complex	physical	interacts with	-	983 (interacts with) 1647	CDK1	GADD45A	9606	9606	-	10747892	-	-	BIOGRID	CDC2|CDC28A|P34CDC2	DDIT1|GADD45	-	RP5-975D15.1	-	Low Throughput
2532459	Wagner P (1998)	107420	113010	334.898	Affinity Capture-Western	physical	interacts with	-	983 (interacts with) 7157	CDK1	TP53	9606	9606	-	9467949	-	-	BIOGRID	CDC2|CDC28A|P34CDC2	BCC7|LFS1|P53|TRP53	-	-	-	Low Throughput
2486401	Hubbi ME (2014)	107420	109338	250.778	Affinity Capture-Western	physical	interacts with	-	983 (interacts with) 3091	CDK1	HIF1A	9606	9606	-	25071185	-	-	BIOGRID	CDC2|CDC28A|P34CDC2	HIF-1A|HIF-1alpha|HIF1|HIF1-ALPHA|MOP1|PASD8|bHLHe78	-	-	-	Low Throughput
2472459	Rosenbluh J (2016)	107880	110962	627.077	Affinity Capture-MS	physical	interacts with	-	1499 (interacts with) 4907	CTNNB1	NT5E	9606	9606	-	27684187	High-credibility protein interactions were identified using draft-PPI and a method for protein interaction credibility scoring (ICS).	-	BIOGRID	CTNNB|MRD19|armadillo	CALJA|CD73|E5NT|NT|NT5|NTE|eN|eNT	OK/SW-cl.35	RP11-321N4.1	-	High Throughput
2447886	Pankow S (2015)	107506	106994	248.092	Affinity Capture-MS	physical	interacts with	-	1080 (interacts with) 506	CFTR	ATP5B	9606	9606	-	26618866	Co-Purifying Protein Identification Technology (CoPIT)	-	BIOGRID	ABC35|ABCC7|CF|CFTR/MRP|MRP7|TNR-CFTR|dJ760C5.1	ATPMB|ATPSB|HEL-S-271	tcag7.78	-	-	High Throughput
2447887	Pankow S (2015)	107506	106987	250.951	Affinity Capture-MS	physical	interacts with	-	1080 (interacts with) 498	CFTR	ATP5A1	9606	9606	-	26618866	Co-Purifying Protein Identification Technology (CoPIT)	-	BIOGRID	ABC35|ABCC7|CF|CFTR/MRP|MRP7|TNR-CFTR|dJ760C5.1	ATP5A|ATP5AL2|ATPM|COXPD22|HEL-S-123m|MC5DN4|MOM2|OMR|ORM|hATP1	tcag7.78	-	-	High Throughput
2447879	Pankow S (2015)	107506	115403	204.276	Affinity Capture-MS	physical	interacts with	-	1080 (interacts with) 10096	CFTR	ACTR3	9606	9606	-	26618866	Co-Purifying Protein Identification Technology (CoPIT)	-	BIOGRID	ABC35|ABCC7|CF|CFTR/MRP|MRP7|TNR-CFTR|dJ760C5.1	ARP3	tcag7.78	-	-	High Throughput
2447877	Pankow S (2015)	107506	109545	336.41	Affinity Capture-MS	physical	interacts with	-	1080 (interacts with) 3313	CFTR	HSPA9	9606	9606	-	26618866	Co-Purifying Protein Identification Technology (CoPIT)	-	BIOGRID	ABC35|ABCC7|CF|CFTR/MRP|MRP7|TNR-CFTR|dJ760C5.1	CRP40|CSA|GRP-75|GRP75|HEL-S-124m|HSPA9B|MOT|MOT2|MTHSP75|PBP74	tcag7.78	-	-	High Throughput
2447870	Pankow S (2015)	107506	110726	220.869	Affinity Capture-MS	physical	interacts with	-	1080 (interacts with) 4642	CFTR	MYO1D	9606	9606	-	26618866	Co-Purifying Protein Identification Technology (CoPIT)	-	BIOGRID	ABC35|ABCC7|CF|CFTR/MRP|MRP7|TNR-CFTR|dJ760C5.1	PPP1R108|myr4	tcag7.78	-	-	High Throughput
2447013	Galindo-Moreno M (2017)	107420	115330	117.327	Affinity Capture-Western	physical	interacts with	-	983 (interacts with) 10013	CDK1	HDAC6	9606	9606	-	28855742	-	-	BIOGRID	CDC2|CDC28A|P34CDC2	CPBHM|HD6|PPP1R90	-	JM21	-	Low Throughput
2447871	Pankow S (2015)	107506	121429	625.82	Affinity Capture-MS	physical	interacts with	-	1080 (interacts with) 57180	CFTR	ACTR3B	9606	9606	-	26618866	Co-Purifying Protein Identification Technology (CoPIT)	-	BIOGRID	ABC35|ABCC7|CF|CFTR/MRP|MRP7|TNR-CFTR|dJ760C5.1	ARP11|ARP3BETA	tcag7.78	-	-	High Throughput
2472431	Rosenbluh J (2016)	107880	106696	383.146	Affinity Capture-MS	physical	interacts with	-	1499 (interacts with) 191	CTNNB1	AHCY	9606	9606	-	27684187	High-credibility protein interactions were identified using draft-PPI and a method for protein interaction credibility scoring (ICS).	-	BIOGRID	CTNNB|MRD19|armadillo	SAHH|adoHcyase	OK/SW-cl.35	-	-	High Throughput
2447015	Galindo-Moreno M (2017)	107420	123565	228.94	Affinity Capture-Western	physical	interacts with	-	983 (interacts with) 81631	CDK1	MAP1LC3B	9606	9606	-	28855742	-	-	BIOGRID	CDC2|CDC28A|P34CDC2	ATG8F|LC3B|MAP1A/1BLC3|MAP1LC3B-a	-	-	-	Low Throughput
2447869	Pankow S (2015)	107506	122031	1738	Affinity Capture-MS	physical	interacts with	-	1080 (interacts with) 64005	CFTR	MYO1G	9606	9606	-	26618866	Co-Purifying Protein Identification Technology (CoPIT)	-	BIOGRID	ABC35|ABCC7|CF|CFTR/MRP|MRP7|TNR-CFTR|dJ760C5.1	HA2|HLA-HA2|MHAG	tcag7.78	-	-	High Throughput
2382438	Pan W (2001)	107420	111860	93.9207	Biochemical Activity	physical	interacts with	Phosphorylation	983 (interacts with) 5925	CDK1	RB1	9606	9606	-	11306463	Cyclin: CCNB1	-	BIOGRID	CDC2|CDC28A|P34CDC2	OSRC|PPP1R130|RB|p105-Rb|pRb|pp110	-	RP11-174I10.1	-	Low Throughput
2472432	Rosenbluh J (2016)	107880	106601	267.702	Affinity Capture-MS	physical	interacts with	-	1499 (interacts with) 86	CTNNB1	ACTL6A	9606	9606	-	27684187	High-credibility protein interactions were identified using draft-PPI and a method for protein interaction credibility scoring (ICS).	-	BIOGRID	CTNNB|MRD19|armadillo	ACTL6|ARPN-BETA|Arp4|BAF53A|INO80K	OK/SW-cl.35	-	-	High Throughput
2447872	Pankow S (2015)	107506	121681	681.826	Affinity Capture-MS	physical	interacts with	-	1080 (interacts with) 57644	CFTR	MYH7B	9606	9606	-	26618866	Co-Purifying Protein Identification Technology (CoPIT)	-	BIOGRID	ABC35|ABCC7|CF|CFTR/MRP|MRP7|TNR-CFTR|dJ760C5.1	MHC14|MYH14	tcag7.78	RP4-756N5.1	-	High Throughput
2386835	Chen X (2016)	107420	112664	257.5	Biochemical Activity	physical	interacts with	Phosphorylation	983 (interacts with) 6788	CDK1	STK3	9606	9606	-	27566175	-	-	BIOGRID	CDC2|CDC28A|P34CDC2	KRS1|MST2	-	-	-	Low Throughput
2447863	Pankow S (2015)	107506	110711	1703.02	Affinity Capture-MS	physical	interacts with	-	1080 (interacts with) 4626	CFTR	MYH8	9606	9606	-	26618866	Co-Purifying Protein Identification Technology (CoPIT)	-	BIOGRID	ABC35|ABCC7|CF|CFTR/MRP|MRP7|TNR-CFTR|dJ760C5.1	MyHC-peri|MyHC-pn|gtMHC-F	tcag7.78	-	-	High Throughput
2447860	Pankow S (2015)	107506	110725	158.628	Affinity Capture-MS	physical	interacts with	-	1080 (interacts with) 4641	CFTR	MYO1C	9606	9606	-	26618866	Co-Purifying Protein Identification Technology (CoPIT)	-	BIOGRID	ABC35|ABCC7|CF|CFTR/MRP|MRP7|TNR-CFTR|dJ760C5.1	MMI-beta|MMIb|NMI|myr2	tcag7.78	-	-	High Throughput
2375948	Wang J (2012)	107420	107070	123.383	Affinity Capture-Western	physical	interacts with	-	983 (interacts with) 598	CDK1	BCL2L1	9606	9606	-	22617334	-	-	BIOGRID	CDC2|CDC28A|P34CDC2	BCL-XL/S|BCL2L|BCLX|BCLXL|BCLXS|Bcl-X|PPP1R52|bcl-xL|bcl-xS	-	RP5-857M17.3	-	Low Throughput
2447866	Pankow S (2015)	107506	110707	1138.58	Affinity Capture-MS	physical	interacts with	-	1080 (interacts with) 4622	CFTR	MYH4	9606	9606	-	26618866	Co-Purifying Protein Identification Technology (CoPIT)	-	BIOGRID	ABC35|ABCC7|CF|CFTR/MRP|MRP7|TNR-CFTR|dJ760C5.1	MYH2B|MyHC-2B|MyHC-IIb	tcag7.78	-	-	High Throughput
2447867	Pankow S (2015)	107506	110704	726.084	Affinity Capture-MS	physical	interacts with	-	1080 (interacts with) 4619	CFTR	MYH1	9606	9606	-	26618866	Co-Purifying Protein Identification Technology (CoPIT)	-	BIOGRID	ABC35|ABCC7|CF|CFTR/MRP|MRP7|TNR-CFTR|dJ760C5.1	HEL71|MYHSA1|MYHa|MyHC-2X/D|MyHC-2x	tcag7.78	-	-	High Throughput
2447865	Pankow S (2015)	107506	110705	768.017	Affinity Capture-MS	physical	interacts with	-	1080 (interacts with) 4620	CFTR	MYH2	9606	9606	-	26618866	Co-Purifying Protein Identification Technology (CoPIT)	-	BIOGRID	ABC35|ABCC7|CF|CFTR/MRP|MRP7|TNR-CFTR|dJ760C5.1	IBM3|MYH2A|MYHSA2|MYHas8|MyHC-2A|MyHC-IIa	tcag7.78	-	-	High Throughput
2360764	Malty RH (2017)	107420	110247	133.341	Affinity Capture-MS	physical	interacts with	-	983 (interacts with) 4069	CDK1	LYZ	9606	9606	-	29128334	HEK293 cell line (FLAG TAGGED; AP/MS)|Normalized Spectral Abundance Factor (NSAF) scores were associated with each mitochondrial protein (MP) interaction. High confidence MP interactions were filtered at a confidence threshold of 90%.	0.00316689	BIOGRID	CDC2|CDC28A|P34CDC2	LZM	-	-	-	High Throughput
2447858	Pankow S (2015)	107506	110710	1369.1	Affinity Capture-MS	physical	interacts with	-	1080 (interacts with) 4625	CFTR	MYH7	9606	9606	-	26618866	Co-Purifying Protein Identification Technology (CoPIT)	-	BIOGRID	ABC35|ABCC7|CF|CFTR/MRP|MRP7|TNR-CFTR|dJ760C5.1	CMD1S|CMH1|MPD1|MYHCB|SPMD|SPMM	tcag7.78	-	-	High Throughput
2447859	Pankow S (2015)	107506	110714	445.715	Affinity Capture-MS	physical	interacts with	-	1080 (interacts with) 4629	CFTR	MYH11	9606	9606	-	26618866	Co-Purifying Protein Identification Technology (CoPIT)	-	BIOGRID	ABC35|ABCC7|CF|CFTR/MRP|MRP7|TNR-CFTR|dJ760C5.1	AAT4|FAA4|SMHC|SMMHC	tcag7.78	-	-	High Throughput
2447856	Pankow S (2015)	107506	107889	272.01	Affinity Capture-MS	physical	interacts with	-	1080 (interacts with) 1509	CFTR	CTSD	9606	9606	-	26618866	Co-Purifying Protein Identification Technology (CoPIT)	-	BIOGRID	ABC35|ABCC7|CF|CFTR/MRP|MRP7|TNR-CFTR|dJ760C5.1	CLN10|CPSD|HEL-S-130P	tcag7.78	-	-	High Throughput
2472406	Rosenbluh J (2016)	107880	112649	257.763	Affinity Capture-MS	physical	interacts with	-	1499 (interacts with) 6772	CTNNB1	STAT1	9606	9606	-	27684187	High-credibility protein interactions were identified using draft-PPI and a method for protein interaction credibility scoring (ICS).	-	BIOGRID	CTNNB|MRD19|armadillo	CANDF7|IMD31A|IMD31B|IMD31C|ISGF-3|STAT91	OK/SW-cl.35	-	-	High Throughput
2447851	Pankow S (2015)	107506	112910	315.946	Affinity Capture-MS	physical	interacts with	-	1080 (interacts with) 7052	CFTR	TGM2	9606	9606	-	26618866	Co-Purifying Protein Identification Technology (CoPIT)	-	BIOGRID	ABC35|ABCC7|CF|CFTR/MRP|MRP7|TNR-CFTR|dJ760C5.1	G-ALPHA-h|GNAH|HEL-S-45|TG2|TGC	tcag7.78	RP5-1054A22.2	-	High Throughput
2225995	Huttlin EL (2017)	107420	114544	540.742	Affinity Capture-MS	physical	interacts with	-	983 (interacts with) 9088	CDK1	PKMYT1	9606	9606	-	28514442	Quantitative scores are a modified CompPASS score derived from Sowa et al., Cell, 2009 (PMID 19615732). The cut-off threshold is > 0.75.|Re-analysis of the data from the first paper, The BioPlex Network: A Systematic Exploration of the Human Interactome, PUBMED:26186194	0.999934	BIOGRID	CDC2|CDC28A|P34CDC2	MYT1|PPP1R126	-	-	-	High Throughput
2230361	Huttlin EL (2017)	107420	107460	104.805	Affinity Capture-MS	physical	interacts with	-	983 (interacts with) 1026	CDK1	CDKN1A	9606	9606	-	28514442	Quantitative scores are a modified CompPASS score derived from Sowa et al., Cell, 2009 (PMID 19615732). The cut-off threshold is > 0.75.|Re-analysis of the data from the first paper, The BioPlex Network: A Systematic Exploration of the Human Interactome, PUBMED:26186194	0.999496	BIOGRID	CDC2|CDC28A|P34CDC2	CAP20|CDKN1|CIP1|MDA-6|P21|SDI1|WAF1|p21CIP1	-	-	-	High Throughput
2234163	Huttlin EL (2017)	107420	107461	107.084	Affinity Capture-MS	physical	interacts with	-	983 (interacts with) 1027	CDK1	CDKN1B	9606	9606	-	28514442	Quantitative scores are a modified CompPASS score derived from Sowa et al., Cell, 2009 (PMID 19615732). The cut-off threshold is > 0.75.|Re-analysis of the data from the first paper, The BioPlex Network: A Systematic Exploration of the Human Interactome, PUBMED:26186194	0.998169	BIOGRID	CDC2|CDC28A|P34CDC2	CDKN4|KIP1|MEN1B|MEN4|P27KIP1	-	-	-	High Throughput
2447841	Pankow S (2015)	107506	112876	775.256	Affinity Capture-MS	physical	interacts with	-	1080 (interacts with) 7018	CFTR	TF	9606	9606	-	26618866	Co-Purifying Protein Identification Technology (CoPIT)	-	BIOGRID	ABC35|ABCC7|CF|CFTR/MRP|MRP7|TNR-CFTR|dJ760C5.1	PRO1557|PRO2086|TFQTL1	tcag7.78	PRO1400	-	High Throughput
2472386	Rosenbluh J (2016)	107880	106994	171.694	Affinity Capture-MS	physical	interacts with	-	1499 (interacts with) 506	CTNNB1	ATP5B	9606	9606	-	27684187	High-credibility protein interactions were identified using draft-PPI and a method for protein interaction credibility scoring (ICS).	-	BIOGRID	CTNNB|MRD19|armadillo	ATPMB|ATPSB|HEL-S-271	OK/SW-cl.35	-	-	High Throughput
2447831	Pankow S (2015)	107506	109547	618.253	Affinity Capture-MS	physical	interacts with	-	1080 (interacts with) 3315	CFTR	HSPB1	9606	9606	-	26618866	Co-Purifying Protein Identification Technology (CoPIT)	-	BIOGRID	ABC35|ABCC7|CF|CFTR/MRP|MRP7|TNR-CFTR|dJ760C5.1	CMT2F|HEL-S-102|HMN2B|HS.76067|HSP27|HSP28|Hsp25|SRP27	tcag7.78	-	-	High Throughput
2472390	Rosenbluh J (2016)	107880	108285	267.905	Affinity Capture-MS	physical	interacts with	-	1499 (interacts with) 1965	CTNNB1	EIF2S1	9606	9606	-	27684187	High-credibility protein interactions were identified using draft-PPI and a method for protein interaction credibility scoring (ICS).	-	BIOGRID	CTNNB|MRD19|armadillo	EIF-2|EIF-2A|EIF-2alpha|EIF2|EIF2A	OK/SW-cl.35	-	-	High Throughput
2447832	Pankow S (2015)	107506	109082	603.745	Affinity Capture-MS	physical	interacts with	-	1080 (interacts with) 2821	CFTR	GPI	9606	9606	-	26618866	Co-Purifying Protein Identification Technology (CoPIT)	-	BIOGRID	ABC35|ABCC7|CF|CFTR/MRP|MRP7|TNR-CFTR|dJ760C5.1	AMF|GNPI|NLK|PGI|PHI|SA-36|SA36	tcag7.78	-	-	High Throughput
2447820	Pankow S (2015)	107506	110730	226.748	Affinity Capture-MS	physical	interacts with	-	1080 (interacts with) 4646	CFTR	MYO6	9606	9606	-	26618866	Co-Purifying Protein Identification Technology (CoPIT)	-	BIOGRID	ABC35|ABCC7|CF|CFTR/MRP|MRP7|TNR-CFTR|dJ760C5.1	DFNA22|DFNB37	tcag7.78	RP3-472A9.1	-	High Throughput
2472385	Rosenbluh J (2016)	107880	113251	270.211	Affinity Capture-MS	physical	interacts with	-	1499 (interacts with) 7408	CTNNB1	VASP	9606	9606	-	27684187	High-credibility protein interactions were identified using draft-PPI and a method for protein interaction credibility scoring (ICS).	-	BIOGRID	CTNNB|MRD19|armadillo	-	OK/SW-cl.35	-	-	High Throughput
2447824	Pankow S (2015)	107506	106798	282.299	Affinity Capture-MS	physical	interacts with	-	1080 (interacts with) 301	CFTR	ANXA1	9606	9606	-	26618866	Co-Purifying Protein Identification Technology (CoPIT)	-	BIOGRID	ABC35|ABCC7|CF|CFTR/MRP|MRP7|TNR-CFTR|dJ760C5.1	ANX1|LPC1	tcag7.78	RP11-71A24.1	-	High Throughput
2447814	Pankow S (2015)	107506	111283	456.453	Affinity Capture-MS	physical	interacts with	-	1080 (interacts with) 5265	CFTR	SERPINA1	9606	9606	-	26618866	Co-Purifying Protein Identification Technology (CoPIT)	-	BIOGRID	ABC35|ABCC7|CF|CFTR/MRP|MRP7|TNR-CFTR|dJ760C5.1	A1A|A1AT|AAT|PI|PI1|PRO2275|alpha1AT	tcag7.78	PRO0684	-	High Throughput
2472371	Rosenbluh J (2016)	107880	111577	247.86	Affinity Capture-MS	physical	interacts with	-	1499 (interacts with) 5591	CTNNB1	PRKDC	9606	9606	-	27684187	High-credibility protein interactions were identified using draft-PPI and a method for protein interaction credibility scoring (ICS).	-	BIOGRID	CTNNB|MRD19|armadillo	DNA-PKcs|DNAPK|DNPK1|HYRC|HYRC1|IMD26|XRCC7|p350	OK/SW-cl.35	-	-	High Throughput
2447818	Pankow S (2015)	107506	110712	393.672	Affinity Capture-MS	physical	interacts with	-	1080 (interacts with) 4627	CFTR	MYH9	9606	9606	-	26618866	Co-Purifying Protein Identification Technology (CoPIT)	-	BIOGRID	ABC35|ABCC7|CF|CFTR/MRP|MRP7|TNR-CFTR|dJ760C5.1	BDPLT6|DFNA17|EPSTS|FTNS|MHA|NMHC-II-A|NMMHC-IIA|NMMHCA	tcag7.78	RP1-68O2.1	-	High Throughput
1443552	Hein MY (2015)	107420	107336	161.663	Affinity Capture-MS	physical	interacts with	-	983 (interacts with) 896	CDK1	CCND3	9606	9606	-	26496610	interaction detected by quantitative BAC-GFP interactomics (QUBIC)	-	BIOGRID	CDC2|CDC28A|P34CDC2	-	-	RP5-973N23.3	-	High Throughput
1443743	Hein MY (2015)	107420	107536	181.152	Affinity Capture-MS	physical	interacts with	-	983 (interacts with) 1111	CDK1	CHEK1	9606	9606	-	26496610	interaction detected by quantitative BAC-GFP interactomics (QUBIC)	-	BIOGRID	CDC2|CDC28A|P34CDC2	CHK1	-	-	-	High Throughput
2447816	Pankow S (2015)	107506	106696	238.27	Affinity Capture-MS	physical	interacts with	-	1080 (interacts with) 191	CFTR	AHCY	9606	9606	-	26618866	Co-Purifying Protein Identification Technology (CoPIT)	-	BIOGRID	ABC35|ABCC7|CF|CFTR/MRP|MRP7|TNR-CFTR|dJ760C5.1	SAHH|adoHcyase	tcag7.78	-	-	High Throughput
1105393	So J (2015)	107420	107331	91.044	Affinity Capture-MS	physical	interacts with	-	983 (interacts with) 890	CDK1	CCNA2	9606	9606	-	25852190	-	-	BIOGRID	CDC2|CDC28A|P34CDC2	CCN1|CCNA	-	-	-	High Throughput
1267311	Wan C (2015)	107420	112860	224.087	Co-fractionation	physical	interacts with	-	983 (interacts with) 7001	CDK1	PRDX2	9606	9606	-	26344197	Fractionation was combined with mass spectrometry from five diverse animal species to predict co-complex protein interactions conserved across metazoa using an integrative computational scoring procedure along with an SVM approach. The significant data set of 16655 PPI, was derived from a set of more than 1M interactions by examining a ROC curve of predicted interactions against reference annotat…	0.138838	BIOGRID	CDC2|CDC28A|P34CDC2	HEL-S-2a|NKEF-B|NKEFB|PRP|PRX2|PRXII|PTX1|TDPX1|TPX1|TSA	-	-	-	High Throughput
1028292	Kipreos ET (1990)	107420	106543	129.044	Biochemical Activity	physical	interacts with	Phosphorylation	983 (interacts with) 25	CDK1	ABL1	9606	9606	-	2183353	-	-	BIOGRID	CDC2|CDC28A|P34CDC2	ABL|JTK7|bcr/abl|c-ABL|c-ABL1|p150|v-abl	-	RP11-83J21.1	-	Low Throughput
2472358	Rosenbluh J (2016)	107880	110149	654.719	Affinity Capture-MS	physical	interacts with	-	1499 (interacts with) 3958	CTNNB1	LGALS3	9606	9606	-	27684187	High-credibility protein interactions were identified using draft-PPI and a method for protein interaction credibility scoring (ICS).	-	BIOGRID	CTNNB|MRD19|armadillo	CBP35|GAL3|GALBP|GALIG|L31|LGALS2|MAC2	OK/SW-cl.35	-	-	High Throughput
2472359	Rosenbluh J (2016)	107880	108258	269.516	Affinity Capture-MS	physical	interacts with	-	1499 (interacts with) 1938	CTNNB1	EEF2	9606	9606	-	27684187	High-credibility protein interactions were identified using draft-PPI and a method for protein interaction credibility scoring (ICS).	-	BIOGRID	CTNNB|MRD19|armadillo	EEF-2|EF-2|EF2|SCA26	OK/SW-cl.35	-	-	High Throughput
893408	Wang J (2011)	107420	109921	227.085	Two-hybrid	physical	interacts with	-	983 (interacts with) 3718	CDK1	JAK3	9606	9606	-	21988832	-	-	BIOGRID	CDC2|CDC28A|P34CDC2	JAK-3|JAK3_HUMAN|JAKL|L-JAK|LJAK	-	-	-	High Throughput
2472338	Rosenbluh J (2016)	107880	110729	637.457	Affinity Capture-MS	physical	interacts with	-	1499 (interacts with) 4645	CTNNB1	MYO5B	9606	9606	-	27684187	High-credibility protein interactions were identified using draft-PPI and a method for protein interaction credibility scoring (ICS).	-	BIOGRID	CTNNB|MRD19|armadillo	-	OK/SW-cl.35	-	-	High Throughput
2447783	Pankow S (2015)	107506	111232	288.925	Affinity Capture-MS	physical	interacts with	-	1080 (interacts with) 5211	CFTR	PFKL	9606	9606	-	26618866	Co-Purifying Protein Identification Technology (CoPIT)	-	BIOGRID	ABC35|ABCC7|CF|CFTR/MRP|MRP7|TNR-CFTR|dJ760C5.1	ATP-PFK|PFK-B|PFK-L	tcag7.78	-	-	High Throughput
860015	Ling YH (1998)	107420	107068	109.794	Biochemical Activity	physical	interacts with	Phosphorylation	983 (interacts with) 596	CDK1	BCL2	9606	9606	-	9668078	-	-	BIOGRID	CDC2|CDC28A|P34CDC2	Bcl-2|PPP1R50	-	-	-	Low Throughput
825908	Yuan WC (2011)	107420	111384	100.886	Biochemical Activity	physical	interacts with	Phosphorylation	983 (interacts with) 5371	CDK1	PML	9606	9606	-	21840486	cdk1.cyclinb	-	BIOGRID	CDC2|CDC28A|P34CDC2	MYL|PP8675|RNF71|TRIM19	-	-	-	Low Throughput
797181	Goss VL (1994)	107420	110187	174.188	Biochemical Activity	physical	interacts with	Phosphorylation	983 (interacts with) 4001	CDK1	LMNB1	9606	9606	-	8034666	figure 1.	-	BIOGRID	CDC2|CDC28A|P34CDC2	ADLD|LMN|LMN2|LMNB	-	-	-	Low Throughput
2471057	Rosenbluh J (2016)	107880	111142	345.054	Affinity Capture-MS	physical	interacts with	-	1499 (interacts with) 5111	CTNNB1	PCNA	9606	9606	-	27684187	High-credibility protein interactions were identified using draft-PPI and a method for protein interaction credibility scoring (ICS).	-	BIOGRID	CTNNB|MRD19|armadillo	ATLD2	OK/SW-cl.35	-	-	High Throughput
2471061	Rosenbluh J (2016)	107880	112108	186.452	Affinity Capture-MS	physical	interacts with	-	1499 (interacts with) 6194	CTNNB1	RPS6	9606	9606	-	27684187	High-credibility protein interactions were identified using draft-PPI and a method for protein interaction credibility scoring (ICS).	-	BIOGRID	CTNNB|MRD19|armadillo	S6	OK/SW-cl.35	RP11-513M16.6	-	High Throughput
2205467	Arora K (2016)	107506	109919	363.898	Affinity Capture-Western	physical	interacts with	-	1080 (interacts with) 3716	CFTR	JAK1	9606	9606	-	27261451	-	-	BIOGRID	ABC35|ABCC7|CF|CFTR/MRP|MRP7|TNR-CFTR|dJ760C5.1	JAK1A|JAK1B|JTK3	tcag7.78	-	-	Low Throughput
2471062	Rosenbluh J (2016)	107880	109547	341.726	Affinity Capture-MS	physical	interacts with	-	1499 (interacts with) 3315	CTNNB1	HSPB1	9606	9606	-	27684187	High-credibility protein interactions were identified using draft-PPI and a method for protein interaction credibility scoring (ICS).	-	BIOGRID	CTNNB|MRD19|armadillo	CMT2F|HEL-S-102|HMN2B|HS.76067|HSP27|HSP28|Hsp25|SRP27	OK/SW-cl.35	-	-	High Throughput
727911	Watanabe N (2004)	107420	113303	254.889	Biochemical Activity	physical	interacts with	Phosphorylation	983 (interacts with) 7465	CDK1	WEE1	9606	9606	-	15070733	Phosphorylation of WEE1 peptides in vitro.	-	BIOGRID	CDC2|CDC28A|P34CDC2	WEE1A|WEE1hu	-	-	-	Low Throughput
2471048	Rosenbluh J (2016)	107880	110187	304.526	Affinity Capture-MS	physical	interacts with	-	1499 (interacts with) 4001	CTNNB1	LMNB1	9606	9606	-	27684187	High-credibility protein interactions were identified using draft-PPI and a method for protein interaction credibility scoring (ICS).	-	BIOGRID	CTNNB|MRD19|armadillo	ADLD|LMN|LMN2|LMNB	OK/SW-cl.35	-	-	High Throughput
723495	Desai D (1995)	107420	114417	131.149	Reconstituted Complex	physical	interacts with	-	983 (interacts with) 8900	CDK1	CCNA1	9606	9606	-	7799941	Cdk1 and Ccna1 form a complex in vitro only in the presence of CAK or HeLa cytoplasmic extract	-	BIOGRID	CDC2|CDC28A|P34CDC2	CT146	-	-	-	Low Throughput
1510040	Collaco A (2010)	107506	112878	257.269	Affinity Capture-Western	physical	interacts with	-	1080 (interacts with) 7020	CFTR	TFAP2A	9606	9606	-	20351096	-	-	BIOGRID	ABC35|ABCC7|CF|CFTR/MRP|MRP7|TNR-CFTR|dJ760C5.1	AP-2|AP-2alpha|AP2TF|BOFS|TFAP2	tcag7.78	RP1-290I10.1	-	Low Throughput
2471045	Rosenbluh J (2016)	107880	109316	160.344	Affinity Capture-MS	physical	interacts with	-	1499 (interacts with) 3066	CTNNB1	HDAC2	9606	9606	-	27684187	High-credibility protein interactions were identified using draft-PPI and a method for protein interaction credibility scoring (ICS).	-	BIOGRID	CTNNB|MRD19|armadillo	HD2|RPD3|YAF1	OK/SW-cl.35	-	-	High Throughput
887066	Li C (2007)	107506	115551	532.281	Affinity Capture-Western	physical	interacts with	-	1080 (interacts with) 10257	CFTR	ABCC4	9606	9606	-	18045536	-	-	BIOGRID	ABC35|ABCC7|CF|CFTR/MRP|MRP7|TNR-CFTR|dJ760C5.1	MOAT-B|MOATB|MRP4	tcag7.78	RP11-74A12.1	-	Low Throughput
2471030	Rosenbluh J (2016)	107880	108578	197.3	Affinity Capture-MS	physical	interacts with	-	1499 (interacts with) 2288	CTNNB1	FKBP4	9606	9606	-	27684187	High-credibility protein interactions were identified using draft-PPI and a method for protein interaction credibility scoring (ICS).	-	BIOGRID	CTNNB|MRD19|armadillo	FKBP51|FKBP52|FKBP59|HBI|Hsp56|PPIase|p52	OK/SW-cl.35	-	-	High Throughput
2471029	Rosenbluh J (2016)	107880	109545	146.319	Affinity Capture-MS	physical	interacts with	-	1499 (interacts with) 3313	CTNNB1	HSPA9	9606	9606	-	27684187	High-credibility protein interactions were identified using draft-PPI and a method for protein interaction credibility scoring (ICS).	-	BIOGRID	CTNNB|MRD19|armadillo	CRP40|CSA|GRP-75|GRP75|HEL-S-124m|HSPA9B|MOT|MOT2|MTHSP75|PBP74	OK/SW-cl.35	-	-	High Throughput
2471016	Rosenbluh J (2016)	107880	115457	316.032	Affinity Capture-MS	physical	interacts with	-	1499 (interacts with) 10155	CTNNB1	TRIM28	9606	9606	-	27684187	High-credibility protein interactions were identified using draft-PPI and a method for protein interaction credibility scoring (ICS).	-	BIOGRID	CTNNB|MRD19|armadillo	KAP1|PPP1R157|RNF96|TF1B|TIF1B	OK/SW-cl.35	-	-	High Throughput
276480	Kharbanda S (1994)	107420	110245	124.914	Affinity Capture-Western	physical	interacts with	-	983 (interacts with) 4067	CDK1	LYN	9606	9606	-	8051175	-	-	BIOGRID	CDC2|CDC28A|P34CDC2	JTK8|p53Lyn|p56Lyn	-	-	-	Low Throughput
890910	Hubert P (1996)	113367	111351	86.2954	Reconstituted Complex	physical	interacts with	-	7535 (interacts with) 5335	ZAP70	PLCG1	9606	9606	-	8906806	-	-	BIOGRID	SRK|STCD|STD|TZK|ZAP-70	NCKAP3|PLC-II|PLC1|PLC148|PLCgamma1	-	RP3-511B24.2	-	Low Throughput
2471017	Rosenbluh J (2016)	107880	110712	281.429	Affinity Capture-MS	physical	interacts with	-	1499 (interacts with) 4627	CTNNB1	MYH9	9606	9606	-	27684187	High-credibility protein interactions were identified using draft-PPI and a method for protein interaction credibility scoring (ICS).	-	BIOGRID	CTNNB|MRD19|armadillo	BDPLT6|DFNA17|EPSTS|FTNS|MHA|NMHC-II-A|NMMHC-IIA|NMMHCA	OK/SW-cl.35	RP1-68O2.1	-	High Throughput
2471021	Rosenbluh J (2016)	107880	110929	191.528	Affinity Capture-MS	physical	interacts with	-	1499 (interacts with) 4869	CTNNB1	NPM1	9606	9606	-	27684187	High-credibility protein interactions were identified using draft-PPI and a method for protein interaction credibility scoring (ICS).	-	BIOGRID	CTNNB|MRD19|armadillo	B23|NPM	OK/SW-cl.35	-	-	High Throughput
691850	Kim KS (2002)	113367	110129	37.3119	Biochemical Activity	physical	interacts with	Phosphorylation	7535 (interacts with) 3937	ZAP70	LCP2	9606	9606	-	12190313	-	-	BIOGRID	SRK|STCD|STD|TZK|ZAP-70	SLP-76|SLP76	-	-	-	Low Throughput
737735	Olah J (2011)	113367	106848	664.283	Reconstituted Complex	physical	interacts with	-	7535 (interacts with) 351	ZAP70	APP	9606	9606	-	21832049	-	-	BIOGRID	SRK|STCD|STD|TZK|ZAP-70	AAA|ABETA|ABPP|AD1|APPI|CTFgamma|CVAP|PN-II|PN2	-	-	-	High Throughput
303305	Plas DR (1996)	113367	111742	87.6525	Reconstituted Complex	physical	interacts with	-	7535 (interacts with) 5777	ZAP70	PTPN6	9606	9606	-	8638162	-	-	BIOGRID	SRK|STCD|STD|TZK|ZAP-70	HCP|HCPH|HPTP1C|PTP-1C|SH-PTP1|SHP-1|SHP-1L|SHP1	-	-	-	Low Throughput
277781	Neumeister EN (1995)	113367	108810	162.326	Affinity Capture-Western	physical	interacts with	-	7535 (interacts with) 2534	ZAP70	FYN	9606	9606	-	7760813	-	-	BIOGRID	SRK|STCD|STD|TZK|ZAP-70	SLK|SYN|p59-FYN	-	RP1-66H14.1	-	Low Throughput
277782	Neumeister EN (1995)	113367	106543	175.049	Affinity Capture-Western	physical	interacts with	-	7535 (interacts with) 25	ZAP70	ABL1	9606	9606	-	7760813	-	-	BIOGRID	SRK|STCD|STD|TZK|ZAP-70	ABL|JTK7|bcr/abl|c-ABL|c-ABL1|p150|v-abl	-	RP11-83J21.1	-	Low Throughput
2470999	Rosenbluh J (2016)	107880	123998	712.58	Affinity Capture-MS	physical	interacts with	-	1499 (interacts with) 84271	CTNNB1	POLDIP3	9606	9606	-	27684187	High-credibility protein interactions were identified using draft-PPI and a method for protein interaction credibility scoring (ICS).	-	BIOGRID	CTNNB|MRD19|armadillo	PDIP46|SKAR	OK/SW-cl.35	RP1-222E13.9	-	High Throughput
2450790	Suzuki H (2001)	107286	106898	160.181	Reconstituted Complex	physical	interacts with	-	836 (interacts with) 405	CASP3	ARNT	9606	9606	-	11593383	-	-	BIOGRID	CPP32|CPP32B|SCA-1	HIF-1-beta|HIF-1beta|HIF1-beta|HIF1B|HIF1BETA|TANGO|bHLHe2	-	-	-	Low Throughput
2532642	Frank AK (2011)	107286	113010	503.488	Affinity Capture-Western	physical	interacts with	-	836 (interacts with) 7157	CASP3	TP53	9606	9606	-	21307660	-	-	BIOGRID	CPP32|CPP32B|SCA-1	BCC7|LFS1|P53|TRP53	-	-	-	Low Throughput
1504599	Chen TC (2014)	107286	108040	247.126	Co-localization	physical	interacts with	-	836 (interacts with) 1676	CASP3	DFFA	9606	9606	-	25241761	in situ PLA	-	BIOGRID	CPP32|CPP32B|SCA-1	DFF-45|DFF1|ICAD	-	H13	-	High Throughput
1504600	Chen TC (2014)	107286	111098	98.7017	Co-localization	physical	interacts with	-	836 (interacts with) 5062	CASP3	PAK2	9606	9606	-	25241761	in situ PLA	-	BIOGRID	CPP32|CPP32B|SCA-1	PAK65|PAKgamma	-	-	-	High Throughput
1504601	Chen TC (2014)	107286	107292	146.027	Co-localization	physical	interacts with	-	836 (interacts with) 842	CASP3	CASP9	9606	9606	-	25241761	in situ PLA	-	BIOGRID	CPP32|CPP32B|SCA-1	APAF-3|APAF3|ICE-LAP6|MCH6|PPP1R56	-	RP11-265F14.3	-	High Throughput
1504596	Chen TC (2014)	107286	110438	165.515	Co-localization	physical	interacts with	-	836 (interacts with) 4292	CASP3	MLH1	9606	9606	-	25241761	in situ PLA	-	BIOGRID	CPP32|CPP32B|SCA-1	COCA2|FCC2|HNPCC|HNPCC2|hMLH1	-	-	-	High Throughput
2470969	Rosenbluh J (2016)	107880	106652	124.378	Affinity Capture-MS	physical	interacts with	-	1499 (interacts with) 142	CTNNB1	PARP1	9606	9606	-	27684187	High-credibility protein interactions were identified using draft-PPI and a method for protein interaction credibility scoring (ICS).	-	BIOGRID	CTNNB|MRD19|armadillo	ADPRT|ADPRT 1|ADPRT1|ARTD1|PARP|PARP-1|PPOL|pADPRT-1	OK/SW-cl.35	RP11-125A15.2	-	High Throughput
1504598	Chen TC (2014)	107286	107460	151.812	Co-localization	physical	interacts with	-	836 (interacts with) 1026	CASP3	CDKN1A	9606	9606	-	25241761	in situ PLA	-	BIOGRID	CPP32|CPP32B|SCA-1	CAP20|CDKN1|CIP1|MDA-6|P21|SDI1|WAF1|p21CIP1	-	-	-	High Throughput
2470968	Rosenbluh J (2016)	107880	113006	626.642	Affinity Capture-MS	physical	interacts with	-	1499 (interacts with) 7153	CTNNB1	TOP2A	9606	9606	-	27684187	High-credibility protein interactions were identified using draft-PPI and a method for protein interaction credibility scoring (ICS).	-	BIOGRID	CTNNB|MRD19|armadillo	TOP2|TP2A	OK/SW-cl.35	-	-	High Throughput
1504591	Chen TC (2014)	107286	107434	264.909	Co-localization	physical	interacts with	-	836 (interacts with) 999	CASP3	CDH1	9606	9606	-	25241761	in situ PLA	-	BIOGRID	CPP32|CPP32B|SCA-1	Arc-1|CD324|CDHE|ECAD|LCAM|UVO	-	-	-	High Throughput
1504592	Chen TC (2014)	107286	106848	1260.77	Co-localization	physical	interacts with	-	836 (interacts with) 351	CASP3	APP	9606	9606	-	25241761	in situ PLA	-	BIOGRID	CPP32|CPP32B|SCA-1	AAA|ABETA|ABPP|AD1|APPI|CTFgamma|CVAP|PN-II|PN2	-	-	-	High Throughput
1504593	Chen TC (2014)	107286	107880	263.526	Co-localization	physical	interacts with	-	836 (interacts with) 1499	CASP3	CTNNB1	9606	9606	-	25241761	in situ PLA	-	BIOGRID	CPP32|CPP32B|SCA-1	CTNNB|MRD19|armadillo	-	OK/SW-cl.35	-	High Throughput
1504594	Chen TC (2014)	107286	112665	125.812	Co-localization	physical	interacts with	-	836 (interacts with) 6789	CASP3	STK4	9606	9606	-	25241761	in situ PLA	-	BIOGRID	CPP32|CPP32B|SCA-1	KRS2|MST1|TIIAC|YSK3	-	-	-	High Throughput
1504589	Chen TC (2014)	107286	110391	108.573	Co-localization	physical	interacts with	-	836 (interacts with) 4233	CASP3	MET	9606	9606	-	25241761	in situ PLA	-	BIOGRID	CPP32|CPP32B|SCA-1	AUTS9|HGFR|RCCP2|c-Met	-	-	-	High Throughput
1261407	Wan C (2015)	107286	108258	167.662	Co-fractionation	physical	interacts with	-	836 (interacts with) 1938	CASP3	EEF2	9606	9606	-	26344197	Fractionation was combined with mass spectrometry from five diverse animal species to predict co-complex protein interactions conserved across metazoa using an integrative computational scoring procedure along with an SVM approach. The significant data set of 16655 PPI, was derived from a set of more than 1M interactions by examining a ROC curve of predicted interactions against reference annotat…	0.0728359	BIOGRID	CPP32|CPP32B|SCA-1	EEF-2|EF-2|EF2|SCA26	-	-	-	High Throughput
666644	Whitcomb SJ (2012)	124082	113895	142.311	Biochemical Activity	physical	interacts with	Methylation	84444 (interacts with) 8290	DOT1L	HIST3H3	9606	9606	-	22619169	figure 2B.|figure 2C. effect of the substrate complex state on the methylation of H3.	-	BIOGRID	DOT1|KMT4	H3.4|H3/g|H3FT|H3t	-	-	-	Low Throughput
2254307	Huttlin EL (2017)	118915	113357	151.71	Affinity Capture-MS	physical	interacts with	-	29785 (interacts with) 7525	CYP2S1	YES1	9606	9606	-	28514442	Quantitative scores are a modified CompPASS score derived from Sowa et al., Cell, 2009 (PMID 19615732). The cut-off threshold is > 0.75.	0.934966	BIOGRID	-	HsT441|P61-YES|Yes|c-yes	UNQ891/PRO1906	-	-	High Throughput
644547	Shah S (2011)	124082	112649	434.661	Affinity Capture-Western	physical	interacts with	-	84444 (interacts with) 6772	DOT1L	STAT1	9606	9606	-	22002246	-	-	BIOGRID	DOT1|KMT4	CANDF7|IMD31A|IMD31B|IMD31C|ISGF-3|STAT91	-	-	-	Low Throughput
2247442	Huttlin EL (2017)	118915	107840	127.986	Affinity Capture-MS	physical	interacts with	-	29785 (interacts with) 1456	CYP2S1	CSNK1G3	9606	9606	-	28514442	Quantitative scores are a modified CompPASS score derived from Sowa et al., Cell, 2009 (PMID 19615732). The cut-off threshold is > 0.75.	0.971135	BIOGRID	-	CKI-gamma 3|CSNK1G3L	UNQ891/PRO1906	-	-	High Throughput
1059420	Betin VM (2009)	107286	106652	117.609	Biochemical Activity	physical	interacts with	Proteolytic Processing	836 (interacts with) 142	CASP3	PARP1	9606	9606	-	19549685	-	-	BIOGRID	CPP32|CPP32B|SCA-1	ADPRT|ADPRT 1|ADPRT1|ARTD1|PARP|PARP-1|PPOL|pADPRT-1	-	RP11-125A15.2	-	Low Throughput
904407	Walsh JG (2008)	107286	107290	138.598	Biochemical Activity	physical	interacts with	Proteolytic Processing	836 (interacts with) 840	CASP3	CASP7	9606	9606	-	18723680	-	-	BIOGRID	CPP32|CPP32B|SCA-1	CASP-7|CMH-1|ICE-LAP3|LICE2|MCH3	-	RP11-211N11.6	-	Low Throughput
904411	Walsh JG (2008)	107286	107285	523.8	Biochemical Activity	physical	interacts with	Proteolytic Processing	836 (interacts with) 835	CASP3	CASP2	9606	9606	-	18723680	-	-	BIOGRID	CPP32|CPP32B|SCA-1	CASP-2|ICH1|NEDD-2|NEDD2|PPP1R57	-	-	-	Low Throughput
532075	Park G (2010)	124082	110929	623.708	Affinity Capture-Western	physical	interacts with	-	84444 (interacts with) 4869	DOT1L	NPM1	9606	9606	-	20431927	-	-	BIOGRID	DOT1|KMT4	B23|NPM	-	-	-	Low Throughput
2242716	Huttlin EL (2017)	118915	108288	272.476	Affinity Capture-MS	physical	interacts with	-	29785 (interacts with) 1969	CYP2S1	EPHA2	9606	9606	-	28514442	Quantitative scores are a modified CompPASS score derived from Sowa et al., Cell, 2009 (PMID 19615732). The cut-off threshold is > 0.75.	0.9867	BIOGRID	-	ARCC2|CTPA|CTPP1|CTRCT6|ECK	UNQ891/PRO1906	-	-	High Throughput
904412	Walsh JG (2008)	107286	107106	201.053	Biochemical Activity	physical	interacts with	Proteolytic Processing	836 (interacts with) 637	CASP3	BID	9606	9606	-	18723680	-	-	BIOGRID	CPP32|CPP32B|SCA-1	FP497	-	-	-	Low Throughput
532079	Park G (2010)	124082	116983	350.908	Affinity Capture-Western	physical	interacts with	-	84444 (interacts with) 23411	DOT1L	SIRT1	9606	9606	-	20431927	-	-	BIOGRID	DOT1|KMT4	SIR2L1	-	RP11-57G10.3	-	Low Throughput
904395	Walsh JG (2008)	107286	112587	267.948	Biochemical Activity	physical	interacts with	Proteolytic Processing	836 (interacts with) 6709	CASP3	SPTAN1	9606	9606	-	18723680	-	-	BIOGRID	CPP32|CPP32B|SCA-1	EIEE5|NEAS|SPTA2	-	-	-	Low Throughput
2327510	Chang CC (2012)	107880	106575	305.39	Affinity Capture-Western	physical	interacts with	-	1499 (interacts with) 60	CTNNB1	ACTB	9606	9606	-	22720799	-	-	BIOGRID	CTNNB|MRD19|armadillo	BRWS1|PS1TP5BP1	OK/SW-cl.35	-	-	Low Throughput
904396	Walsh JG (2008)	107286	112649	276.398	Biochemical Activity	physical	interacts with	Proteolytic Processing	836 (interacts with) 6772	CASP3	STAT1	9606	9606	-	18723680	-	-	BIOGRID	CPP32|CPP32B|SCA-1	CANDF7|IMD31A|IMD31B|IMD31C|ISGF-3|STAT91	-	-	-	Low Throughput
2236970	Huttlin EL (2017)	118915	112592	595.962	Affinity Capture-MS	physical	interacts with	-	29785 (interacts with) 6714	CYP2S1	SRC	9606	9606	-	28514442	Quantitative scores are a modified CompPASS score derived from Sowa et al., Cell, 2009 (PMID 19615732). The cut-off threshold is > 0.75.	0.996055	BIOGRID	-	ASV|SRC1|c-SRC|p60-Src	UNQ891/PRO1906	RP5-823N20.1	-	High Throughput
2461674	Xi Y (2013)	107880	112592	297.543	Affinity Capture-Western	physical	interacts with	-	1499 (interacts with) 6714	CTNNB1	SRC	9606	9606	-	23246962	-	-	BIOGRID	CTNNB|MRD19|armadillo	ASV|SRC1|c-SRC|p60-Src	OK/SW-cl.35	RP5-823N20.1	-	Low Throughput
2463262	Rosenbluh J (2016)	107880	109535	162.383	Affinity Capture-MS	physical	interacts with	-	1499 (interacts with) 3303	CTNNB1	HSPA1A	9606	9606	-	27684187	High-credibility protein interactions were identified using draft-PPI and a method for protein interaction credibility scoring (ICS).	-	BIOGRID	CTNNB|MRD19|armadillo	HEL-S-103|HSP70-1|HSP70-1A|HSP70I|HSP72|HSPA1	OK/SW-cl.35	DAQB-147D11.1	-	High Throughput
2234433	Huttlin EL (2017)	118915	111564	261.63	Affinity Capture-MS	physical	interacts with	-	29785 (interacts with) 5578	CYP2S1	PRKCA	9606	9606	-	28514442	Quantitative scores are a modified CompPASS score derived from Sowa et al., Cell, 2009 (PMID 19615732). The cut-off threshold is > 0.75.	0.998021	BIOGRID	-	AAG6|PKC-alpha|PKCA|PRKACA	UNQ891/PRO1906	-	-	High Throughput
854472	Teraoka H (1996)	107286	111577	191.569	Biochemical Activity	physical	interacts with	Proteolytic Processing	836 (interacts with) 5591	CASP3	PRKDC	9606	9606	-	8804412	-	-	BIOGRID	CPP32|CPP32B|SCA-1	DNA-PKcs|DNAPK|DNPK1|HYRC|HYRC1|IMD26|XRCC7|p350	-	-	-	Low Throughput
854726	Fattman CL (2001)	107286	111860	131.746	Biochemical Activity	physical	interacts with	Proteolytic Processing	836 (interacts with) 5925	CASP3	RB1	9606	9606	-	11420704	-	-	BIOGRID	CPP32|CPP32B|SCA-1	OSRC|PPP1R130|RB|p105-Rb|pRb|pp110	-	RP11-174I10.1	-	Low Throughput
1112868	Li Y (2008)	107880	115330	168.891	Affinity Capture-Western	physical	interacts with	-	1499 (interacts with) 10013	CTNNB1	HDAC6	9606	9606	-	18356165	Figure 2	-	BIOGRID	CTNNB|MRD19|armadillo	CPBHM|HD6|PPP1R90	OK/SW-cl.35	JM21	-	Low Throughput
810625	Rickers A (1999)	107286	112550	168.282	Biochemical Activity	physical	interacts with	Proteolytic Processing	836 (interacts with) 6667	CASP3	SP1	9606	9606	-	10103059	-	-	BIOGRID	CPP32|CPP32B|SCA-1	-	-	-	-	Low Throughput
824352	Enomoto A (2003)	107286	111585	116.801	Biochemical Activity	physical	interacts with	Proteolytic Processing	836 (interacts with) 5599	CASP3	MAPK8	9606	9606	-	12821118	-	-	BIOGRID	CPP32|CPP32B|SCA-1	JNK|JNK-46|JNK1|JNK1A2|JNK21B1/2|PRKM8|SAPK1|SAPK1c	-	-	-	Low Throughput
824353	Enomoto A (2003)	107286	111587	89.5384	Biochemical Activity	physical	interacts with	Proteolytic Processing	836 (interacts with) 5601	CASP3	MAPK9	9606	9606	-	12821118	-	-	BIOGRID	CPP32|CPP32B|SCA-1	JNK-55|JNK2|JNK2A|JNK2ALPHA|JNK2B|JNK2BETA|PRKM9|SAPK|SAPK1a|p54a|p54aSAPK	-	-	-	Low Throughput
844388	Wang X (2006)	107506	106627	1738	Affinity Capture-MS	physical	interacts with	-	1080 (interacts with) 114	CFTR	ADCY8	9606	9606	-	17110338	-	-	BIOGRID	ABC35|ABCC7|CF|CFTR/MRP|MRP7|TNR-CFTR|dJ760C5.1	AC8|ADCY3|HBAC1	tcag7.78	-	-	High Throughput
797774	Takahashi M (1998)	107286	111571	272.793	Biochemical Activity	physical	interacts with	Proteolytic Processing	836 (interacts with) 5585	CASP3	PKN1	9606	9606	-	9751706	-	-	BIOGRID	CPP32|CPP32B|SCA-1	DBK|PAK-1|PAK1|PKN|PKN-ALPHA|PRK1|PRKCL1	-	-	-	Low Throughput
858601	Park CS (2004)	107880	107331	290.707	Affinity Capture-Western	physical	interacts with	-	1499 (interacts with) 890	CTNNB1	CCNA2	9606	9606	-	14985333	-	-	BIOGRID	CTNNB|MRD19|armadillo	CCN1|CCNA	OK/SW-cl.35	-	-	Low Throughput
905207	Kim I (2012)	107880	111715	452.02	Affinity Capture-RNA	physical	interacts with	-	1499 (interacts with) 5743	CTNNB1	PTGS2	9606	9606	-	22544606	-	-	BIOGRID	CTNNB|MRD19|armadillo	COX-2|COX2|GRIPGHS|PGG/HS|PGHS-2|PHS-2|hCox-2	OK/SW-cl.35	-	-	Low Throughput
740026	Olah J (2011)	107880	106848	2025.96	Reconstituted Complex	physical	interacts with	-	1499 (interacts with) 351	CTNNB1	APP	9606	9606	-	21832049	-	-	BIOGRID	CTNNB|MRD19|armadillo	AAA|ABETA|ABPP|AD1|APPI|CTFgamma|CVAP|PN-II|PN2	OK/SW-cl.35	-	-	High Throughput
531998	Holloway KR (2010)	107880	116983	249.791	Affinity Capture-Western	physical	interacts with	-	1499 (interacts with) 23411	CTNNB1	SIRT1	9606	9606	-	20439735	-	-	BIOGRID	CTNNB|MRD19|armadillo	SIR2L1	OK/SW-cl.35	RP11-57G10.3	-	Low Throughput
297550	Wu YM (2001)	107286	107128	133.038	Biochemical Activity	physical	interacts with	Proteolytic Processing	836 (interacts with) 660	CASP3	BMX	9606	9606	-	11278797	-	-	BIOGRID	CPP32|CPP32B|SCA-1	ETK|PSCTK2|PSCTK3	-	-	-	Low Throughput
244039	Liang Y (2002)	107286	107068	94.2037	Biochemical Activity	physical	interacts with	Proteolytic Processing	836 (interacts with) 596	CASP3	BCL2	9606	9606	-	11752215	Caspase 3-specific inhibitor Ac-DEVD-CHO prevented Bcl-2 cleavage and attenuated NCS-induced apoptosis in bcl-2-transfected PC12 cells	-	BIOGRID	CPP32|CPP32B|SCA-1	Bcl-2|PPP1R50	-	-	-	Low Throughput
244869	Weng C (2005)	107286	110338	95.2436	Biochemical Activity	physical	interacts with	Proteolytic Processing	836 (interacts with) 4170	CASP3	MCL1	9606	9606	-	15637055	Specific cleavage of Mcl-1 at Asp-127 and Asp-157;C-terminal domain of Mcl-1 became proapoptotic as a result of caspase-3 cleavage, and its physical interaction and cooperation with tBid, Bak, and voltage-dependent anion-selective channel 1 promoted mitoc	-	BIOGRID	CPP32|CPP32B|SCA-1	BCL2L3|EAT|MCL1-ES|MCL1L|MCL1S|Mcl-1|TM|bcl2-L-3|mcl1/EAT	-	-	-	Low Throughput
1266693	Wan C (2015)	106711	111309	92.5921	Co-fractionation	physical	interacts with	-	208 (interacts with) 5291	AKT2	PIK3CB	9606	9606	-	26344197	Fractionation was combined with mass spectrometry from five diverse animal species to predict co-complex protein interactions conserved across metazoa using an integrative computational scoring procedure along with an SVM approach. The significant data set of 16655 PPI, was derived from a set of more than 1M interactions by examining a ROC curve of predicted interactions against reference annotat…	0.227735	BIOGRID	HIHGHH|PKBB|PKBBETA|PRKBB|RAC-BETA	P110BETA|PI3K|PI3KBETA|PIK3C1	-	-	-	High Throughput
1266694	Wan C (2015)	106711	111311	1492.11	Co-fractionation	physical	interacts with	-	208 (interacts with) 5293	AKT2	PIK3CD	9606	9606	-	26344197	Fractionation was combined with mass spectrometry from five diverse animal species to predict co-complex protein interactions conserved across metazoa using an integrative computational scoring procedure along with an SVM approach. The significant data set of 16655 PPI, was derived from a set of more than 1M interactions by examining a ROC curve of predicted interactions against reference annotat…	0.193082	BIOGRID	HIHGHH|PKBB|PKBBETA|PRKBB|RAC-BETA	APDS|IMD14|P110DELTA|PI3K|p110D	-	RP11-558F24.3	-	High Throughput
482489	Vietor I (2005)	107880	115106	156.216	Affinity Capture-Western	physical	interacts with	-	1499 (interacts with) 9759	CTNNB1	HDAC4	9606	9606	-	16204248	-	-	BIOGRID	CTNNB|MRD19|armadillo	AHO3|BDMR|HA6116|HD4|HDAC-4|HDAC-A|HDACA	OK/SW-cl.35	-	-	Low Throughput
245557	Kouzmenko AP (2004)	107880	108403	223.883	Affinity Capture-Western	physical	interacts with	-	1499 (interacts with) 2099	CTNNB1	ESR1	9606	9606	-	15304487	-	-	BIOGRID	CTNNB|MRD19|armadillo	ER|ESR|ESRA|ESTRR|Era|NR3A1	OK/SW-cl.35	RP1-130E4.1	-	Low Throughput
279819	Tian YC (2002)	107880	112906	682.318	Affinity Capture-Western	physical	interacts with	-	1499 (interacts with) 7048	CTNNB1	TGFBR2	9606	9606	-	12000714	-	-	BIOGRID	CTNNB|MRD19|armadillo	AAT3|FAA3|LDS1B|LDS2|LDS2B|MFS2|RIIC|TAAD2|TGFR-2|TGFbeta-RII	OK/SW-cl.35	-	-	Low Throughput
893495	Wang J (2011)	106711	115438	361.477	Two-hybrid	physical	interacts with	-	208 (interacts with) 10135	AKT2	NAMPT	9606	9606	-	21988832	-	-	BIOGRID	HIHGHH|PKBB|PKBBETA|PRKBB|RAC-BETA	1110035O14Rik|PBEF|PBEF1|VF|VISFATIN	-	-	-	High Throughput
2227807	Huttlin EL (2017)	114864	111587	87.618	Affinity Capture-MS	physical	interacts with	-	9479 (interacts with) 5601	MAPK8IP1	MAPK9	9606	9606	-	28514442	Quantitative scores are a modified CompPASS score derived from Sowa et al., Cell, 2009 (PMID 19615732). The cut-off threshold is > 0.75.	0.99983	BIOGRID	IB1|JIP-1|JIP1|PRKM8IP	JNK-55|JNK2|JNK2A|JNK2ALPHA|JNK2B|JNK2BETA|PRKM9|SAPK|SAPK1a|p54a|p54aSAPK	-	-	-	High Throughput
1261635	Wan C (2015)	106711	108293	127.162	Co-fractionation	physical	interacts with	-	208 (interacts with) 1978	AKT2	EIF4EBP1	9606	9606	-	26344197	Fractionation was combined with mass spectrometry from five diverse animal species to predict co-complex protein interactions conserved across metazoa using an integrative computational scoring procedure along with an SVM approach. The significant data set of 16655 PPI, was derived from a set of more than 1M interactions by examining a ROC curve of predicted interactions against reference annotat…	0.102494	BIOGRID	HIHGHH|PKBB|PKBBETA|PRKBB|RAC-BETA	4E-BP1|4EBP1|BP-1|PHAS-I	-	-	-	High Throughput
844341	Wang X (2006)	107506	107083	332.506	Affinity Capture-MS	physical	interacts with	-	1080 (interacts with) 613	CFTR	BCR	9606	9606	-	17110338	-	-	BIOGRID	ABC35|ABCC7|CF|CFTR/MRP|MRP7|TNR-CFTR|dJ760C5.1	ALL|BCR1|CML|D22S11|D22S662|PHL	tcag7.78	-	-	High Throughput
1059379	Nishitani Y (2006)	114864	109928	194.173	Affinity Capture-Western	physical	interacts with	-	9479 (interacts with) 3725	MAPK8IP1	JUN	9606	9606	-	16343492	-	-	BIOGRID	IB1|JIP-1|JIP1|PRKM8IP	AP-1|AP1|c-Jun	-	-	-	Low Throughput
893317	Wang J (2011)	106711	106832	206.462	Two-hybrid	physical	interacts with	-	208 (interacts with) 335	AKT2	APOA1	9606	9606	-	21988832	-	-	BIOGRID	HIHGHH|PKBB|PKBBETA|PRKBB|RAC-BETA	-	-	-	-	High Throughput
739686	Olah J (2011)	106711	106848	1036.97	Reconstituted Complex	physical	interacts with	-	208 (interacts with) 351	AKT2	APP	9606	9606	-	21832049	-	-	BIOGRID	HIHGHH|PKBB|PKBBETA|PRKBB|RAC-BETA	AAA|ABETA|ABPP|AD1|APPI|CTFgamma|CVAP|PN-II|PN2	-	-	-	High Throughput
2226083	Huttlin EL (2017)	114864	111585	173.12	Affinity Capture-MS	physical	interacts with	-	9479 (interacts with) 5599	MAPK8IP1	MAPK8	9606	9606	-	28514442	Quantitative scores are a modified CompPASS score derived from Sowa et al., Cell, 2009 (PMID 19615732). The cut-off threshold is > 0.75.	0.999931	BIOGRID	IB1|JIP-1|JIP1|PRKM8IP	JNK|JNK-46|JNK1|JNK1A2|JNK21B1/2|PRKM8|SAPK1|SAPK1c	-	-	-	High Throughput
824283	Blanco S (2008)	114864	112748	153.891	Co-fractionation	physical	interacts with	-	9479 (interacts with) 6885	MAPK8IP1	MAP3K7	9606	9606	-	18286207	figure 8.	-	BIOGRID	IB1|JIP-1|JIP1|PRKM8IP	MEKK7|TAK1|TGF1a	-	RP1-154G14.1	-	Low Throughput
1262717	Wan C (2015)	106536	109082	756.387	Co-fractionation	physical	interacts with	-	18 (interacts with) 2821	ABAT	GPI	9606	9606	-	26344197	Fractionation was combined with mass spectrometry from five diverse animal species to predict co-complex protein interactions conserved across metazoa using an integrative computational scoring procedure along with an SVM approach. The significant data set of 16655 PPI, was derived from a set of more than 1M interactions by examining a ROC curve of predicted interactions against reference annotat…	0.0735519	BIOGRID	GABA-AT|GABAT|NPD009	AMF|GNPI|NLK|PGI|PHI|SA-36|SA36	hCG_1984265	-	-	High Throughput
893318	Wang J (2011)	106711	106835	139.427	Two-hybrid	physical	interacts with	-	208 (interacts with) 338	AKT2	APOB	9606	9606	-	21988832	-	-	BIOGRID	HIHGHH|PKBB|PKBBETA|PRKBB|RAC-BETA	FLDB|LDLCQ4	-	-	-	High Throughput
844327	Wang X (2006)	107506	110149	580.872	Affinity Capture-MS	physical	interacts with	-	1080 (interacts with) 3958	CFTR	LGALS3	9606	9606	-	17110338	-	-	BIOGRID	ABC35|ABCC7|CF|CFTR/MRP|MRP7|TNR-CFTR|dJ760C5.1	CBP35|GAL3|GALBP|GALIG|L31|LGALS2|MAC2	tcag7.78	-	-	High Throughput
860918	Muresan Z (2005)	114864	106848	593.026	Affinity Capture-Western	physical	interacts with	-	9479 (interacts with) 351	MAPK8IP1	APP	9606	9606	-	16301330	-	-	BIOGRID	IB1|JIP-1|JIP1|PRKM8IP	AAA|ABETA|ABPP|AD1|APPI|CTFgamma|CVAP|PN-II|PN2	-	-	-	Low Throughput
244760	Ryo A (2001)	107880	111317	341.149	Reconstituted Complex	physical	interacts with	-	1499 (interacts with) 5300	CTNNB1	PIN1	9606	9606	-	11533658	Pin1 directly binds a phosphorylated Ser-Pro motif next to the APC-binding site in beta-catenin, inhibits its interaction with APC and increases its translocation into the nucleus	-	BIOGRID	CTNNB|MRD19|armadillo	DOD|UBL5	OK/SW-cl.35	-	-	Low Throughput
1258379	Wan C (2015)	106536	106732	310.652	Co-fractionation	physical	interacts with	-	18 (interacts with) 231	ABAT	AKR1B1	9606	9606	-	26344197	Fractionation was combined with mass spectrometry from five diverse animal species to predict co-complex protein interactions conserved across metazoa using an integrative computational scoring procedure along with an SVM approach. The significant data set of 16655 PPI, was derived from a set of more than 1M interactions by examining a ROC curve of predicted interactions against reference annotat…	0.116957	BIOGRID	GABA-AT|GABAT|NPD009	ADR|ALDR1|ALR2|AR	hCG_1984265	-	-	High Throughput
733603	Song JJ (2005)	114864	106710	296.351	Affinity Capture-Western	physical	interacts with	-	9479 (interacts with) 207	MAPK8IP1	AKT1	9606	9606	-	15998799	-	-	BIOGRID	IB1|JIP-1|JIP1|PRKM8IP	AKT|CWS6|PKB|PKB-ALPHA|PRKBA|RAC|RAC-ALPHA	-	-	-	Low Throughput
2569819	Fuhrmann DC (2018)	106710	109187	143.018	Affinity Capture-Western	physical	interacts with	-	207 (interacts with) 2932	AKT1	GSK3B	9606	9606	-	29464284	the 'hit' proteins were identified using an antibody that apparently recognizes both GSK3alpha and GSK3beta; therefore both genes/proteins have been entered as 'hits' for this interaction	-	BIOGRID	AKT|CWS6|PKB|PKB-ALPHA|PRKBA|RAC|RAC-ALPHA	-	-	-	-	Low Throughput
604651	Sun M (2001)	106711	108403	480.169	Biochemical Activity	physical	interacts with	Phosphorylation	208 (interacts with) 2099	AKT2	ESR1	9606	9606	-	11507039	-	-	BIOGRID	HIHGHH|PKBB|PKBBETA|PRKBB|RAC-BETA	ER|ESR|ESRA|ESTRR|Era|NR3A1	-	RP1-130E4.1	-	Low Throughput
907529	Bolego C (2009)	111714	111715	339.449	Affinity Capture-Western	physical	interacts with	-	5742 (interacts with) 5743	PTGS1	PTGS2	9606	9606	-	18838483	Interaction occurred in HUVECs treated with IL-1Beta	-	BIOGRID	COX1|COX3|PCOX1|PES-1|PGG/HS|PGHS-1|PGHS1|PHS1|PTGHS	COX-2|COX2|GRIPGHS|PGG/HS|PGHS-2|PHS-2|hCox-2	RP11-542K23.6	-	-	Low Throughput
275753	Gotthardt M (2000)	114864	110216	195.888	Reconstituted Complex	physical	interacts with	-	9479 (interacts with) 4036	MAPK8IP1	LRP2	9606	9606	-	10827173	-	-	BIOGRID	IB1|JIP-1|JIP1|PRKM8IP	DBS|GP330	-	-	-	Low Throughput
844318	Wang X (2006)	107506	106821	284.358	Affinity Capture-MS	physical	interacts with	-	1080 (interacts with) 324	CFTR	APC	9606	9606	-	17110338	-	-	BIOGRID	ABC35|ABCC7|CF|CFTR/MRP|MRP7|TNR-CFTR|dJ760C5.1	BTPS2|DP2|DP2.5|DP3|GS|PPP1R46	tcag7.78	-	-	High Throughput
275757	Gotthardt M (2000)	114864	110215	130.625	Reconstituted Complex	physical	interacts with	-	9479 (interacts with) 4035	MAPK8IP1	LRP1	9606	9606	-	10827173	-	-	BIOGRID	IB1|JIP-1|JIP1|PRKM8IP	A2MR|APOER|APR|CD91|IGFBP3R|LRP|LRP1A|TGFBR5	-	-	-	Low Throughput
905087	Cha SH (2004)	111714	107305	1398.55	Affinity Capture-Western	physical	interacts with	-	5742 (interacts with) 857	PTGS1	CAV1	9606	9606	-	15230350	-	-	BIOGRID	COX1|COX3|PCOX1|PES-1|PGG/HS|PGHS-1|PGHS1|PHS1|PTGHS	BSCL3|CGL3|LCCNS|MSTP085|PPH3|VIP21	RP11-542K23.6	-	-	Low Throughput
2537148	Iaconelli J (2017)	106710	115330	194.8	Affinity Capture-Western	physical	interacts with	-	207 (interacts with) 10013	AKT1	HDAC6	9606	9606	-	28628306	-	-	BIOGRID	AKT|CWS6|PKB|PKB-ALPHA|PRKBA|RAC|RAC-ALPHA	CPBHM|HD6|PPP1R90	-	JM21	-	Low Throughput
2387473	Roessig L (2001)	106710	107460	202.351	Biochemical Activity	physical	interacts with	Phosphorylation	207 (interacts with) 1026	AKT1	CDKN1A	9606	9606	-	11463845	-	-	BIOGRID	AKT|CWS6|PKB|PKB-ALPHA|PRKBA|RAC|RAC-ALPHA	CAP20|CDKN1|CIP1|MDA-6|P21|SDI1|WAF1|p21CIP1	-	-	-	Low Throughput
2454495	Li YM (2005)	106710	106898	204.371	Biochemical Activity	physical	interacts with	Phosphorylation	207 (interacts with) 405	AKT1	ARNT	9606	9606	-	15833858	-	-	BIOGRID	AKT|CWS6|PKB|PKB-ALPHA|PRKBA|RAC|RAC-ALPHA	HIF-1-beta|HIF-1beta|HIF1-beta|HIF1B|HIF1BETA|TANGO|bHLHe2	-	-	-	Low Throughput
2381457	Luo M (2007)	106710	109874	101.326	Biochemical Activity	physical	interacts with	Phosphorylation	207 (interacts with) 3667	AKT1	IRS1	9606	9606	-	17640984	-	-	BIOGRID	AKT|CWS6|PKB|PKB-ALPHA|PRKBA|RAC|RAC-ALPHA	HIRS-1	-	-	-	Low Throughput
2380811	Daakour S (2016)	106710	110913	219.403	Two-hybrid	physical	interacts with	-	207 (interacts with) 4851	AKT1	NOTCH1	9606	9606	-	27229929	-	-	BIOGRID	AKT|CWS6|PKB|PKB-ALPHA|PRKBA|RAC|RAC-ALPHA	AOS5|AOVD1|TAN1|hN1	-	-	-	High Throughput
2210744	Koul D (2001)	106710	110859	168.922	Affinity Capture-Western	physical	interacts with	-	207 (interacts with) 4792	AKT1	NFKBIA	9606	9606	-	11278366	-	-	BIOGRID	AKT|CWS6|PKB|PKB-ALPHA|PRKBA|RAC|RAC-ALPHA	IKBA|MAD-3|NFKBI	-	-	-	Low Throughput
2211119	Hu F (2016)	106710	108551	422.86	Affinity Capture-Western	physical	interacts with	-	207 (interacts with) 2260	AKT1	FGFR1	9606	9606	-	25945695	-	-	BIOGRID	AKT|CWS6|PKB|PKB-ALPHA|PRKBA|RAC|RAC-ALPHA	BFGFR|CD331|CEK|FGFBR|FGFR-1|FLG|FLT-2|FLT2|HBGFR|HH2|HRTFDS|KAL2|N-SAM|OGD|bFGF-R-1	-	-	-	Low Throughput
2297620	Moon HE (2015)	106710	111719	149.954	Co-localization	physical	interacts with	-	207 (interacts with) 5747	AKT1	PTK2	9606	9606	-	25792870	PLA	-	BIOGRID	AKT|CWS6|PKB|PKB-ALPHA|PRKBA|RAC|RAC-ALPHA	FADK|FAK|FAK1|FRNK|PPP1R71|p125FAK|pp125FAK	-	-	-	Low Throughput
1504517	Chen TC (2014)	106710	108598	154.945	Co-localization	physical	interacts with	-	207 (interacts with) 2309	AKT1	FOXO3	9606	9606	-	25241761	in situ PLA	-	BIOGRID	AKT|CWS6|PKB|PKB-ALPHA|PRKBA|RAC|RAC-ALPHA	AF6q21|FKHRL1|FKHRL1P2|FOXO2|FOXO3A	-	-	-	High Throughput
1504507	Chen TC (2014)	106710	110263	327.259	Co-localization	physical	interacts with	-	207 (interacts with) 4088	AKT1	SMAD3	9606	9606	-	25241761	in situ PLA	-	BIOGRID	AKT|CWS6|PKB|PKB-ALPHA|PRKBA|RAC|RAC-ALPHA	HSPC193|HsT17436|JV15-2|LDS1C|LDS3|MADH3	-	-	-	High Throughput
1504522	Chen TC (2014)	106710	107048	388.185	Co-localization	physical	interacts with	-	207 (interacts with) 572	AKT1	BAD	9606	9606	-	25241761	in situ PLA	-	BIOGRID	AKT|CWS6|PKB|PKB-ALPHA|PRKBA|RAC|RAC-ALPHA	BBC2|BCL2L8	-	-	-	High Throughput
1504518	Chen TC (2014)	106710	108597	269.659	Co-localization	physical	interacts with	-	207 (interacts with) 2308	AKT1	FOXO1	9606	9606	-	25241761	in situ PLA	-	BIOGRID	AKT|CWS6|PKB|PKB-ALPHA|PRKBA|RAC|RAC-ALPHA	FKH1|FKHR|FOXO1A	-	-	-	High Throughput
1504519	Chen TC (2014)	106710	108293	351.267	Co-localization	physical	interacts with	-	207 (interacts with) 1978	AKT1	EIF4EBP1	9606	9606	-	25241761	in situ PLA	-	BIOGRID	AKT|CWS6|PKB|PKB-ALPHA|PRKBA|RAC|RAC-ALPHA	4E-BP1|4EBP1|BP-1|PHAS-I	-	-	-	High Throughput
2252844	Huttlin EL (2017)	112952	106607	252.188	Affinity Capture-MS	physical	interacts with	-	7097 (interacts with) 92	TLR2	ACVR2A	9606	9606	-	28514442	Quantitative scores are a modified CompPASS score derived from Sowa et al., Cell, 2009 (PMID 19615732). The cut-off threshold is > 0.75.	0.944151	BIOGRID	CD282|TIL4	ACTRII|ACVR2	-	-	-	High Throughput
1418051	Arroyo R (2015)	106710	109160	727.315	Two-hybrid	physical	interacts with	-	207 (interacts with) 2903	AKT1	GRIN2A	9606	9606	-	25640309	-	-	BIOGRID	AKT|CWS6|PKB|PKB-ALPHA|PRKBA|RAC|RAC-ALPHA	EPND|FESD|GluN2A|LKS|NMDAR2A|NR2A	-	RP11-297M9.2	-	High Throughput
2596028	Medina-Carmona E (2017)	108072	113014	81.9252	Co-crystal Structure	physical	interacts with	-	1728 (interacts with) 7161	NQO1	TP73	9606	9606	-	28291250	-	-	BIOGRID	DHQU|DIA4|DTD|NMOR1|NMORI|QR1	P73	-	-	-	Low Throughput
914968	Wu T (2013)	108072	110852	83.1428	Affinity Capture-Western	physical	interacts with	-	1728 (interacts with) 4780	NQO1	NFE2L2	9606	9606	-	24140708	-	-	BIOGRID	DHQU|DIA4|DTD|NMOR1|NMORI|QR1	NRF2	-	-	-	Low Throughput
2534792	Anwar A (2003)	108072	113010	585.701	Reconstituted Complex	physical	interacts with	-	1728 (interacts with) 7157	NQO1	TP53	9606	9606	-	12529318	-	-	BIOGRID	DHQU|DIA4|DTD|NMOR1|NMORI|QR1	BCC7|LFS1|P53|TRP53	-	-	-	Low Throughput
2521682	Oh ET (2016)	108072	109338	245.809	Reconstituted Complex	physical	interacts with	-	1728 (interacts with) 3091	NQO1	HIF1A	9606	9606	-	27966538	-	-	BIOGRID	DHQU|DIA4|DTD|NMOR1|NMORI|QR1	HIF-1A|HIF-1alpha|HIF1|HIF1-ALPHA|MOP1|PASD8|bHLHe78	-	-	-	Low Throughput
2562031	Baljuls A (2012)	111831	107141	138.366	Affinity Capture-Western	physical	interacts with	-	5894 (interacts with) 673	RAF1	BRAF	9606	9606	-	22605333	-	-	BIOGRID	CMD1NN|CRAF|NS5|Raf-1|c-Raf	B-RAF1|BRAF1|NS7|RAFB1	-	-	-	Low Throughput
752692	Havugimana PC (2012)	108072	123998	139.74	Co-fractionation	physical	interacts with	-	1728 (interacts with) 84271	NQO1	POLDIP3	9606	9606	-	22939629	Denoised score >= 0.75	0.777	BIOGRID	DHQU|DIA4|DTD|NMOR1|NMORI|QR1	PDIP46|SKAR	-	RP1-222E13.9	-	High Throughput
914967	Wu T (2013)	108072	106652	212.114	Affinity Capture-Western	physical	interacts with	-	1728 (interacts with) 142	NQO1	PARP1	9606	9606	-	24140708	-	-	BIOGRID	DHQU|DIA4|DTD|NMOR1|NMORI|QR1	ADPRT|ADPRT 1|ADPRT1|ARTD1|PARP|PARP-1|PPOL|pADPRT-1	-	RP11-125A15.2	-	Low Throughput
300872	Yang RB (1999)	112952	109863	252.643	Affinity Capture-Western	physical	interacts with	-	7097 (interacts with) 3654	TLR2	IRAK1	9606	9606	-	10395652	-	-	BIOGRID	CD282|TIL4	IRAK|pelle	-	-	-	Low Throughput
2600601	Wu GJ (2018)	111831	115457	215.718	Affinity Capture-Western	physical	interacts with	-	5894 (interacts with) 10155	RAF1	TRIM28	9606	9606	-	29917268	-	-	BIOGRID	CMD1NN|CRAF|NS5|Raf-1|c-Raf	KAP1|PPP1R157|RNF96|TF1B|TIF1B	-	-	-	Low Throughput
2460292	Ivanov AA (2017)	111831	110391	57.6837	FRET	physical	interacts with	-	5894 (interacts with) 4233	RAF1	MET	9606	9606	-	28628118	Time-resolved fluorescence energy transfer (TR-FRET)	-	BIOGRID	CMD1NN|CRAF|NS5|Raf-1|c-Raf	AUTS9|HGFR|RCCP2|c-Met	-	-	-	High Throughput
2460288	Ivanov AA (2017)	111831	108376	279.647	FRET	physical	interacts with	-	5894 (interacts with) 2064	RAF1	ERBB2	9606	9606	-	28628118	Time-resolved fluorescence energy transfer (TR-FRET)	-	BIOGRID	CMD1NN|CRAF|NS5|Raf-1|c-Raf	CD340|HER-2|HER-2/neu|HER2|MLN 19|NEU|NGL|TKR1	-	-	-	High Throughput
1417556	Arroyo R (2015)	106710	116199	377.813	Two-hybrid	physical	interacts with	-	207 (interacts with) 11009	AKT1	IL24	9606	9606	-	25640309	-	-	BIOGRID	AKT|CWS6|PKB|PKB-ALPHA|PRKBA|RAC|RAC-ALPHA	C49A|FISP|IL10B|MDA7|MOB5|ST16	-	-	-	High Throughput
2460296	Ivanov AA (2017)	111831	112874	132.868	FRET	physical	interacts with	-	5894 (interacts with) 7015	RAF1	TERT	9606	9606	-	28628118	Time-resolved fluorescence energy transfer (TR-FRET)	-	BIOGRID	CMD1NN|CRAF|NS5|Raf-1|c-Raf	CMM9|DKCA2|DKCB4|EST2|PFBMFT1|TCS1|TP2|TRT|hEST2|hTRT	-	-	-	High Throughput
1417562	Arroyo R (2015)	106710	111286	501.314	Two-hybrid	physical	interacts with	-	207 (interacts with) 5268	AKT1	SERPINB5	9606	9606	-	25640309	-	-	BIOGRID	AKT|CWS6|PKB|PKB-ALPHA|PRKBA|RAC|RAC-ALPHA	PI5|maspin	-	-	-	High Throughput
2460283	Ivanov AA (2017)	111831	107334	61.4937	FRET	physical	interacts with	-	5894 (interacts with) 894	RAF1	CCND2	9606	9606	-	28628118	Time-resolved fluorescence energy transfer (TR-FRET)	-	BIOGRID	CMD1NN|CRAF|NS5|Raf-1|c-Raf	KIAK0002|MPPH3	-	-	-	High Throughput
1260489	Wan C (2015)	106710	107832	353.303	Co-fractionation	physical	interacts with	-	207 (interacts with) 1445	AKT1	CSK	9606	9606	-	26344197	Fractionation was combined with mass spectrometry from five diverse animal species to predict co-complex protein interactions conserved across metazoa using an integrative computational scoring procedure along with an SVM approach. The significant data set of 16655 PPI, was derived from a set of more than 1M interactions by examining a ROC curve of predicted interactions against reference annotat…	0.0770203	BIOGRID	AKT|CWS6|PKB|PKB-ALPHA|PRKBA|RAC|RAC-ALPHA	-	-	-	-	High Throughput
2460282	Ivanov AA (2017)	111831	106898	114.96	FRET	physical	interacts with	-	5894 (interacts with) 405	RAF1	ARNT	9606	9606	-	28628118	Time-resolved fluorescence energy transfer (TR-FRET)	-	BIOGRID	CMD1NN|CRAF|NS5|Raf-1|c-Raf	HIF-1-beta|HIF-1beta|HIF1-beta|HIF1B|HIF1BETA|TANGO|bHLHe2	-	-	-	High Throughput
1266692	Wan C (2015)	106710	111309	331.25	Co-fractionation	physical	interacts with	-	207 (interacts with) 5291	AKT1	PIK3CB	9606	9606	-	26344197	Fractionation was combined with mass spectrometry from five diverse animal species to predict co-complex protein interactions conserved across metazoa using an integrative computational scoring procedure along with an SVM approach. The significant data set of 16655 PPI, was derived from a set of more than 1M interactions by examining a ROC curve of predicted interactions against reference annotat…	0.343087	BIOGRID	AKT|CWS6|PKB|PKB-ALPHA|PRKBA|RAC|RAC-ALPHA	P110BETA|PI3K|PI3KBETA|PIK3C1	-	-	-	High Throughput
1107433	Fang D (2007)	106710	107880	215.483	Biochemical Activity	physical	interacts with	Phosphorylation	207 (interacts with) 1499	AKT1	CTNNB1	9606	9606	-	17287208	-	-	BIOGRID	AKT|CWS6|PKB|PKB-ALPHA|PRKBA|RAC|RAC-ALPHA	CTNNB|MRD19|armadillo	-	OK/SW-cl.35	-	Low Throughput
2460287	Ivanov AA (2017)	111831	108288	78.1909	FRET	physical	interacts with	-	5894 (interacts with) 1969	RAF1	EPHA2	9606	9606	-	28628118	Time-resolved fluorescence energy transfer (TR-FRET)	-	BIOGRID	CMD1NN|CRAF|NS5|Raf-1|c-Raf	ARCC2|CTPA|CTPP1|CTRCT6|ECK	-	-	-	High Throughput
2459024	Ivanov AA (2017)	111831	107464	81.6495	FRET	physical	interacts with	-	5894 (interacts with) 1030	RAF1	CDKN2B	9606	9606	-	28628118	Time-resolved fluorescence energy transfer (TR-FRET)	-	BIOGRID	CMD1NN|CRAF|NS5|Raf-1|c-Raf	CDK4I|INK4B|MTS2|P15|TP15|p15INK4b	-	RP11-149I2.1	-	High Throughput
2459023	Ivanov AA (2017)	111831	107456	59.3286	FRET	physical	interacts with	-	5894 (interacts with) 1021	RAF1	CDK6	9606	9606	-	28628118	Time-resolved fluorescence energy transfer (TR-FRET)	-	BIOGRID	CMD1NN|CRAF|NS5|Raf-1|c-Raf	MCPH12|PLSTIRE	-	-	-	High Throughput
2459022	Ivanov AA (2017)	111831	107454	98.4179	FRET	physical	interacts with	-	5894 (interacts with) 1019	RAF1	CDK4	9606	9606	-	28628118	Time-resolved fluorescence energy transfer (TR-FRET)	-	BIOGRID	CMD1NN|CRAF|NS5|Raf-1|c-Raf	CMM3|PSK-J3	-	-	-	High Throughput
2331343	Boldt K (2016)	111154	115171	234.143	Affinity Capture-MS	physical	interacts with	-	5127 (interacts with) 9833	CDK16	MELK	9606	9606	-	27173435	-	-	BIOGRID	PCTAIRE|PCTAIRE1|PCTGAIRE|PCTK1	HPK38	-	RP11-8N6.1	-	High Throughput
2459021	Ivanov AA (2017)	111831	106710	142.665	FRET	physical	interacts with	-	5894 (interacts with) 207	RAF1	AKT1	9606	9606	-	28628118	Time-resolved fluorescence energy transfer (TR-FRET)	-	BIOGRID	CMD1NN|CRAF|NS5|Raf-1|c-Raf	AKT|CWS6|PKB|PKB-ALPHA|PRKBA|RAC|RAC-ALPHA	-	-	-	High Throughput
2459029	Ivanov AA (2017)	111831	111182	74.0057	FRET	physical	interacts with	-	5894 (interacts with) 5156	RAF1	PDGFRA	9606	9606	-	28628118	Time-resolved fluorescence energy transfer (TR-FRET)	-	BIOGRID	CMD1NN|CRAF|NS5|Raf-1|c-Raf	CD140A|PDGFR-2|PDGFR2|RHEPDGFRA	-	-	-	High Throughput
1059775	Wang Y (2006)	106710	111351	292.985	Biochemical Activity	physical	interacts with	Phosphorylation	207 (interacts with) 5335	AKT1	PLCG1	9606	9606	-	16525023	-	-	BIOGRID	AKT|CWS6|PKB|PKB-ALPHA|PRKBA|RAC|RAC-ALPHA	NCKAP3|PLC-II|PLC1|PLC148|PLCgamma1	-	RP3-511B24.2	-	Low Throughput
2330545	Boldt K (2016)	111154	115106	166.843	Affinity Capture-MS	physical	interacts with	-	5127 (interacts with) 9759	CDK16	HDAC4	9606	9606	-	27173435	-	-	BIOGRID	PCTAIRE|PCTAIRE1|PCTGAIRE|PCTK1	AHO3|BDMR|HA6116|HD4|HDAC-4|HDAC-A|HDACA	-	-	-	High Throughput
878807	Qi XJ (2006)	106710	107070	240.587	Biochemical Activity	physical	interacts with	Phosphorylation	207 (interacts with) 598	AKT1	BCL2L1	9606	9606	-	16282323	-	-	BIOGRID	AKT|CWS6|PKB|PKB-ALPHA|PRKBA|RAC|RAC-ALPHA	BCL-XL/S|BCL2L|BCLX|BCLXL|BCLXS|Bcl-X|PPP1R52|bcl-xL|bcl-xS	-	RP5-857M17.3	-	Low Throughput
870156	Kim AH (2001)	106710	110381	314.095	Biochemical Activity	physical	interacts with	Phosphorylation	207 (interacts with) 4217	AKT1	MAP3K5	9606	9606	-	11154276	-	-	BIOGRID	AKT|CWS6|PKB|PKB-ALPHA|PRKBA|RAC|RAC-ALPHA	ASK1|MAPKKK5|MEKK5	-	RP3-325F22.4	-	Low Throughput
2401557	Yokote H (2005)	108552	108357	132.319	Affinity Capture-Western	physical	interacts with	-	2261 (interacts with) 2043	FGFR3	EPHA4	9606	9606	-	16365308	-	-	BIOGRID	ACH|CD333|CEK2|HSFGFR3EX|JTK4	HEK8|SEK|TYRO1	-	-	-	Low Throughput
736611	Manes NP (2005)	106710	111228	695.04	Biochemical Activity	physical	interacts with	Phosphorylation	207 (interacts with) 5207	AKT1	PFKFB1	9606	9606	-	15896703	-	-	BIOGRID	AKT|CWS6|PKB|PKB-ALPHA|PRKBA|RAC|RAC-ALPHA	F6PK|HL2K|PFRX	-	-	-	Low Throughput
738427	Olah J (2011)	106710	106848	1524.82	Reconstituted Complex	physical	interacts with	-	207 (interacts with) 351	AKT1	APP	9606	9606	-	21832049	-	-	BIOGRID	AKT|CWS6|PKB|PKB-ALPHA|PRKBA|RAC|RAC-ALPHA	AAA|ABETA|ABPP|AD1|APPI|CTFgamma|CVAP|PN-II|PN2	-	-	-	High Throughput
832356	Kim EK (2011)	106710	121582	288.955	Affinity Capture-Western	physical	interacts with	-	207 (interacts with) 57521	AKT1	RPTOR	9606	9606	-	21339740	-	-	BIOGRID	AKT|CWS6|PKB|PKB-ALPHA|PRKBA|RAC|RAC-ALPHA	KOG1|Mip1	-	-	-	Low Throughput
825251	Du K (1998)	106710	107775	229.134	Biochemical Activity	physical	interacts with	Phosphorylation	207 (interacts with) 1385	AKT1	CREB1	9606	9606	-	9829964	-	-	BIOGRID	AKT|CWS6|PKB|PKB-ALPHA|PRKBA|RAC|RAC-ALPHA	CREB	-	-	-	Low Throughput
2455068	Kang S (2008)	108552	112111	219.965	Biochemical Activity	physical	interacts with	Phosphorylation	2261 (interacts with) 6197	FGFR3	RPS6KA3	9606	9606	-	18156174	-	-	BIOGRID	ACH|CD333|CEK2|HSFGFR3EX|JTK4	CLS|HU-3|ISPK-1|MAPKAPK1B|MRX19|RSK|RSK2|S6K-alpha3|p90-RSK2|pp90RSK2	-	RP11-393H10.3	-	Low Throughput
727752	Zhu QS (2011)	106710	106575	317.257	Affinity Capture-MS	physical	interacts with	-	207 (interacts with) 60	AKT1	ACTB	9606	9606	-	20856200	-	-	BIOGRID	AKT|CWS6|PKB|PKB-ALPHA|PRKBA|RAC|RAC-ALPHA	BRWS1|PS1TP5BP1	-	-	-	Low Throughput
2249838	Huttlin EL (2017)	111154	107842	166.111	Affinity Capture-MS	physical	interacts with	-	5127 (interacts with) 1459	CDK16	CSNK2A2	9606	9606	-	28514442	Quantitative scores are a modified CompPASS score derived from Sowa et al., Cell, 2009 (PMID 19615732). The cut-off threshold is > 0.75.	0.960189	BIOGRID	PCTAIRE|PCTAIRE1|PCTGAIRE|PCTK1	CK2A2|CSNK2A1	-	-	-	High Throughput
271089	Stelzl U (2005)	108552	106790	193.362	Two-hybrid	physical	interacts with	-	2261 (interacts with) 293	FGFR3	SLC25A6	9606	9606	-	16169070	-	3	BIOGRID	ACH|CD333|CEK2|HSFGFR3EX|JTK4	2|3|AAC3|ANT|ANT 2|ANT 3|ANT3|ANT3Y	-	RP11-261P4.6	-	High Throughput
2255515	Huttlin EL (2017)	111154	107841	269.865	Affinity Capture-MS	physical	interacts with	-	5127 (interacts with) 1457	CDK16	CSNK2A1	9606	9606	-	28514442	Quantitative scores are a modified CompPASS score derived from Sowa et al., Cell, 2009 (PMID 19615732). The cut-off threshold is > 0.75.	0.926752	BIOGRID	PCTAIRE|PCTAIRE1|PCTGAIRE|PCTK1	CK2A1|CKII|CSNK2A3	-	-	-	High Throughput
1034822	Johnson SE (2006)	111831	111591	123.889	Two-hybrid	physical	interacts with	-	5894 (interacts with) 5605	RAF1	MAP2K2	9606	9606	-	16364241	-	-	BIOGRID	CMD1NN|CRAF|NS5|Raf-1|c-Raf	CFC4|MAPKK2|MEK2|MKK2|PRKMK2	-	-	-	Low Throughput
727757	Zhu QS (2011)	106710	109545	164.064	Affinity Capture-Western	physical	interacts with	-	207 (interacts with) 3313	AKT1	HSPA9	9606	9606	-	20856200	-	-	BIOGRID	AKT|CWS6|PKB|PKB-ALPHA|PRKBA|RAC|RAC-ALPHA	CRP40|CSA|GRP-75|GRP75|HEL-S-124m|HSPA9B|MOT|MOT2|MTHSP75|PBP74	-	-	-	Low Throughput
724168	Klein JB (2005)	106710	111474	155.903	Affinity Capture-MS	physical	interacts with	-	207 (interacts with) 5478	AKT1	PPIA	9606	9606	-	16027165	-	-	BIOGRID	AKT|CWS6|PKB|PKB-ALPHA|PRKBA|RAC|RAC-ALPHA	CYPA|CYPH|HEL-S-69p	-	-	-	Low Throughput
884908	Polzien L (2009)	111831	107048	148.144	Biochemical Activity	physical	interacts with	Phosphorylation	5894 (interacts with) 572	RAF1	BAD	9606	9606	-	19667065	-	-	BIOGRID	CMD1NN|CRAF|NS5|Raf-1|c-Raf	BBC2|BCL2L8	-	-	-	Low Throughput
1028724	Wang J (2009)	111831	111860	158.183	Affinity Capture-Western	physical	interacts with	-	5894 (interacts with) 5925	RAF1	RB1	9606	9606	-	19058874	-	-	BIOGRID	CMD1NN|CRAF|NS5|Raf-1|c-Raf	OSRC|PPP1R130|RB|p105-Rb|pRb|pp110	-	RP11-174I10.1	-	Low Throughput
1028714	Wang J (2009)	111831	111580	142.226	Biochemical Activity	physical	interacts with	Phosphorylation	5894 (interacts with) 5594	RAF1	MAPK1	9606	9606	-	19058874	-	-	BIOGRID	CMD1NN|CRAF|NS5|Raf-1|c-Raf	ERK|ERK-2|ERK2|ERT1|MAPK2|P42MAPK|PRKM1|PRKM2|p38|p40|p41|p41mapk|p42-MAPK	-	-	-	Low Throughput
1105751	So J (2015)	111154	111332	176.988	Affinity Capture-MS	physical	interacts with	-	5127 (interacts with) 5315	CDK16	PKM	9606	9606	-	25852190	-	-	BIOGRID	PCTAIRE|PCTAIRE1|PCTGAIRE|PCTK1	CTHBP|HEL-S-30|OIP3|PK3|PKM2|TCB|THBP1	-	-	-	High Throughput
740599	Soler-Lopez M (2011)	111643	118098	192.022	Affinity Capture-Western	physical	interacts with	-	5664 (interacts with) 27250	PSEN2	PDCD4	9606	9606	-	21163940	-	-	BIOGRID	AD3L|AD4|CMD1V|PS2|STM2	H731	-	RP11-348N5.4	-	Low Throughput
905157	Yuryev A (2003)	111831	111332	196.11	Two-hybrid	physical	interacts with	-	5894 (interacts with) 5315	RAF1	PKM	9606	9606	-	12620389	-	-	BIOGRID	CMD1NN|CRAF|NS5|Raf-1|c-Raf	CTHBP|HEL-S-30|OIP3|PK3|PKM2|TCB|THBP1	-	-	-	High Throughput
1443813	Hein MY (2015)	111643	107606	366.371	Affinity Capture-MS	physical	interacts with	-	5664 (interacts with) 1195	PSEN2	CLK1	9606	9606	-	26496610	interaction detected by quantitative BAC-GFP interactomics (QUBIC)	-	BIOGRID	AD3L|AD4|CMD1V|PS2|STM2	CLK|CLK/STY|STY	-	-	-	High Throughput
830041	Jin S (2005)	111831	107068	99.0921	Affinity Capture-Western	physical	interacts with	-	5894 (interacts with) 596	RAF1	BCL2	9606	9606	-	15849194	-	-	BIOGRID	CMD1NN|CRAF|NS5|Raf-1|c-Raf	Bcl-2|PPP1R50	-	-	-	Low Throughput
2269790	Huttlin EL (2017)	114396	108070	386.983	Affinity Capture-MS	physical	interacts with	-	8877 (interacts with) 1725	SPHK1	DHPS	9606	9606	-	28514442	Quantitative scores are a modified CompPASS score derived from Sowa et al., Cell, 2009 (PMID 19615732). The cut-off threshold is > 0.75.|Re-analysis of the data from the first paper, The BioPlex Network: A Systematic Exploration of the Human Interactome, PUBMED:26186194	0.787253	BIOGRID	SPHK	DHS|DS|MIG13	-	-	-	High Throughput
857609	Rajalingam K (2005)	111831	111507	119.575	Affinity Capture-Western	physical	interacts with	-	5894 (interacts with) 5515	RAF1	PPP2CA	9606	9606	-	16041367	-	-	BIOGRID	CMD1NN|CRAF|NS5|Raf-1|c-Raf	PP2Ac|PP2CA|PP2Calpha|RP-C	-	-	-	Low Throughput
942190	Harikumar KB (2014)	114396	106827	1055.84	Reconstituted Complex	physical	interacts with	-	8877 (interacts with) 330	SPHK1	BIRC3	9606	9606	-	24464131	-	-	BIOGRID	SPHK	AIP1|API2|CIAP2|HAIP1|HIAP1|MALT2|MIHC|RNF49|c-IAP2	-	-	-	Low Throughput
737646	Olah J (2011)	111154	106848	744.952	Reconstituted Complex	physical	interacts with	-	5127 (interacts with) 351	CDK16	APP	9606	9606	-	21832049	-	-	BIOGRID	PCTAIRE|PCTAIRE1|PCTGAIRE|PCTK1	AAA|ABETA|ABPP|AD1|APPI|CTFgamma|CVAP|PN-II|PN2	-	-	-	High Throughput
854409	Dougherty MK (2005)	111831	111317	164.536	Affinity Capture-Western	physical	interacts with	-	5894 (interacts with) 5300	RAF1	PIN1	9606	9606	-	15664191	-	-	BIOGRID	CMD1NN|CRAF|NS5|Raf-1|c-Raf	DOD|UBL5	-	-	-	Low Throughput
679212	Soundararajan R (2009)	111831	112344	472.696	Affinity Capture-Western	physical	interacts with	-	5894 (interacts with) 6446	RAF1	SGK1	9606	9606	-	19380724	-	-	BIOGRID	CMD1NN|CRAF|NS5|Raf-1|c-Raf	SGK	-	RP1-188K17.1	-	Low Throughput
740231	Soler-Lopez M (2011)	111643	111941	141.488	Two-hybrid	physical	interacts with	-	5664 (interacts with) 6009	PSEN2	RHEB	9606	9606	-	21163940	-	-	BIOGRID	AD3L|AD4|CMD1V|PS2|STM2	RHEB2	-	-	-	Low Throughput
724151	Klein JB (2005)	106710	107572	490.534	Affinity Capture-MS	physical	interacts with	-	207 (interacts with) 1152	AKT1	CKB	9606	9606	-	16027165	-	-	BIOGRID	AKT|CWS6|PKB|PKB-ALPHA|PRKBA|RAC|RAC-ALPHA	B-CK|BCK|CKBB|HEL-211|HEL-S-29	-	-	-	Low Throughput
316760	Pathan NI (1996)	111831	110124	124.894	Affinity Capture-Western	physical	interacts with	-	5894 (interacts with) 3932	RAF1	LCK	9606	9606	-	8939988	-	-	BIOGRID	CMD1NN|CRAF|NS5|Raf-1|c-Raf	IMD22|LSK|YT16|p56lck|pp58lck	-	RP4-675E8.4	-	Low Throughput
2563748	Rebholz H (2006)	110245	112113	121.155	Biochemical Activity	physical	interacts with	Phosphorylation	4067 (interacts with) 6199	LYN	RPS6KB2	9606	9606	-	16640565	-	-	BIOGRID	JTK8|p53Lyn|p56Lyn	KLS|P70-beta|P70-beta-1|P70-beta-2|S6K-beta2|S6K2|SRK|STK14B|p70(S6K)-beta|p70S6Kb	-	-	-	Low Throughput
2563749	Rebholz H (2006)	110245	112112	163.12	Biochemical Activity	physical	interacts with	Phosphorylation	4067 (interacts with) 6198	LYN	RPS6KB1	9606	9606	-	16640565	-	-	BIOGRID	JTK8|p53Lyn|p56Lyn	PS6K|S6K|S6K-beta-1|S6K1|STK14A|p70 S6KA|p70(S6K)-alpha|p70-S6K|p70-alpha	-	-	-	Low Throughput
1416276	Grossmann A (2015)	110245	111719	70.752	Two-hybrid	physical	interacts with	-	4067 (interacts with) 5747	LYN	PTK2	9606	9606	-	25814554	-	-	BIOGRID	JTK8|p53Lyn|p56Lyn	FADK|FAK|FAK1|FRNK|PPP1R71|p125FAK|pp125FAK	-	-	-	High Throughput
2526927	Su D (2018)	110763	107459	150.634	Affinity Capture-MS	physical	interacts with	-	4683 (interacts with) 1025	NBN	CDK9	9606	9606	-	30179224	Source of NBN not clear	-	BIOGRID	AT-V1|AT-V2|ATV|NBS|NBS1|P95	C-2k|CDC2L4|CTK1|PITALRE|TAK	-	RP11-228B15.5	-	High Throughput
301688	Van Der Hoeven PC (2000)	111831	111576	87.1329	Reconstituted Complex	physical	interacts with	-	5894 (interacts with) 5590	RAF1	PRKCZ	9606	9606	-	10620507	-	-	BIOGRID	CMD1NN|CRAF|NS5|Raf-1|c-Raf	PKC-ZETA|PKC2	-	RP11-181G12.1	-	Low Throughput
442302	Shimada K (2006)	111831	114364	222.14	Affinity Capture-Western	physical	interacts with	-	5894 (interacts with) 8837	RAF1	CFLAR	9606	9606	-	16537561	-	-	BIOGRID	CMD1NN|CRAF|NS5|Raf-1|c-Raf	CASH|CASP8AP1|CLARP|Casper|FLAME|FLAME-1|FLAME1|FLIP|I-FLICE|MRIT|c-FLIP|c-FLIPL|c-FLIPR|c-FLIPS	-	-	-	Low Throughput
302985	Passer BJ (1999)	111643	107070	348.717	Affinity Capture-Western	physical	interacts with	-	5664 (interacts with) 598	PSEN2	BCL2L1	9606	9606	-	10446169	-	-	BIOGRID	AD3L|AD4|CMD1V|PS2|STM2	BCL-XL/S|BCL2L|BCLX|BCLXL|BCLXS|Bcl-X|PPP1R52|bcl-xL|bcl-xS	-	RP5-857M17.3	-	Low Throughput
2454384	Kuo YC (2015)	110763	109338	203.613	Reconstituted Complex	physical	interacts with	-	4683 (interacts with) 3091	NBN	HIF1A	9606	9606	-	25959252	-	-	BIOGRID	AT-V1|AT-V2|ATV|NBS|NBS1|P95	HIF-1A|HIF-1alpha|HIF1|HIF1-ALPHA|MOP1|PASD8|bHLHe78	-	-	-	Low Throughput
2526924	Su D (2018)	110763	108258	129.367	Affinity Capture-MS	physical	interacts with	-	4683 (interacts with) 1938	NBN	EEF2	9606	9606	-	30179224	Source of NBN not clear	-	BIOGRID	AT-V1|AT-V2|ATV|NBS|NBS1|P95	EEF-2|EF-2|EF2|SCA26	-	-	-	High Throughput
869162	Grimmler M (2007)	110245	107461	111.247	Biochemical Activity	physical	interacts with	Phosphorylation	4067 (interacts with) 1027	LYN	CDKN1B	9606	9606	-	17254966	-	-	BIOGRID	JTK8|p53Lyn|p56Lyn	CDKN4|KIP1|MEN1B|MEN4|P27KIP1	-	-	-	Low Throughput
1417842	Arroyo R (2015)	110763	112499	89.3424	Two-hybrid	physical	interacts with	-	4683 (interacts with) 6615	NBN	SNAI1	9606	9606	-	25640309	-	-	BIOGRID	AT-V1|AT-V2|ATV|NBS|NBS1|P95	SLUGH2|SNA|SNAH|SNAIL|SNAIL1|dJ710H13.1	-	-	-	High Throughput
570163	Kim CK (2011)	106710	108377	342.559	Affinity Capture-Western	physical	interacts with	-	207 (interacts with) 2065	AKT1	ERBB3	9606	9606	-	21930127	-	-	BIOGRID	AKT|CWS6|PKB|PKB-ALPHA|PRKBA|RAC|RAC-ALPHA	ErbB-3|HER3|LCCS2|MDA-BF-1|c-erbB-3|c-erbB3|erbB3-S|p180-ErbB3|p45-sErbB3|p85-sErbB3	-	-	-	Low Throughput
283116	Wang S (1998)	111831	111869	156.97	Affinity Capture-Western	physical	interacts with	-	5894 (interacts with) 5934	RAF1	RBL2	9606	9606	-	9819434	-	-	BIOGRID	CMD1NN|CRAF|NS5|Raf-1|c-Raf	P130|Rb2	-	-	-	Low Throughput
887696	Simms HH (1997)	110245	112979	153.681	Reconstituted Complex	physical	interacts with	-	4067 (interacts with) 7124	LYN	TNF	9606	9606	-	9230816	-	-	BIOGRID	JTK8|p53Lyn|p56Lyn	DIF|TNF-alpha|TNFA|TNFSF2	-	DADB-70P7.1	-	Low Throughput
1505777	Wei F (2015)	110763	106962	64.3951	Affinity Capture-Western	physical	interacts with	-	4683 (interacts with) 472	NBN	ATM	9606	9606	-	25088203	-	-	BIOGRID	AT-V1|AT-V2|ATV|NBS|NBS1|P95	AT1|ATA|ATC|ATD|ATDC|ATE|TEL1|TELO1	-	-	-	Low Throughput
590120	Campbell RA (2001)	106710	108403	251.909	Biochemical Activity	physical	interacts with	Phosphorylation	207 (interacts with) 2099	AKT1	ESR1	9606	9606	-	11139588	-	-	BIOGRID	AKT|CWS6|PKB|PKB-ALPHA|PRKBA|RAC|RAC-ALPHA	ER|ESR|ESRA|ESTRR|Era|NR3A1	-	RP1-130E4.1	-	Low Throughput
948246	Kubota S (2013)	110245	115457	243.206	Biochemical Activity	physical	interacts with	Phosphorylation	4067 (interacts with) 10155	LYN	TRIM28	9606	9606	-	23645696	-	-	BIOGRID	JTK8|p53Lyn|p56Lyn	KAP1|PPP1R157|RNF96|TF1B|TIF1B	-	-	-	Low Throughput
301643	Morrison DK (1989)	111831	111185	185.957	Reconstituted Complex	physical	interacts with	-	5894 (interacts with) 5159	RAF1	PDGFRB	9606	9606	-	2475255	-	-	BIOGRID	CMD1NN|CRAF|NS5|Raf-1|c-Raf	CD140B|IBGC4|IMF1|JTK12|PDGFR|PDGFR-1|PDGFR1	-	-	-	Low Throughput
887697	Simms HH (1997)	110245	109769	239.017	Reconstituted Complex	physical	interacts with	-	4067 (interacts with) 3553	LYN	IL1B	9606	9606	-	9230816	-	-	BIOGRID	JTK8|p53Lyn|p56Lyn	IL-1|IL1-BETA|IL1F2	-	-	-	Low Throughput
286404	Xia K (1996)	111831	109920	98.8883	Reconstituted Complex	physical	interacts with	-	5894 (interacts with) 3717	RAF1	JAK2	9606	9606	-	8876196	-	-	BIOGRID	CMD1NN|CRAF|NS5|Raf-1|c-Raf	JTK10|THCYT3	-	-	-	Low Throughput
1055155	Wang JQ (2013)	110763	108757	116.127	Affinity Capture-Western	physical	interacts with	-	4683 (interacts with) 2475	NBN	MTOR	9606	9606	-	23762398	-	-	BIOGRID	AT-V1|AT-V2|ATV|NBS|NBS1|P95	FRAP|FRAP1|FRAP2|RAFT1|RAPT1	-	-	-	Low Throughput
277817	Wang HG (1996)	111831	107070	128.975	Reconstituted Complex	physical	interacts with	-	5894 (interacts with) 598	RAF1	BCL2L1	9606	9606	-	8929532	-	-	BIOGRID	CMD1NN|CRAF|NS5|Raf-1|c-Raf	BCL-XL/S|BCL2L|BCLX|BCLXL|BCLXS|Bcl-X|PPP1R52|bcl-xL|bcl-xS	-	RP5-857M17.3	-	Low Throughput
615979	Falck J (2005)	110763	111577	173.147	Affinity Capture-MS	physical	interacts with	-	4683 (interacts with) 5591	NBN	PRKDC	9606	9606	-	15758953	-	-	BIOGRID	AT-V1|AT-V2|ATV|NBS|NBS1|P95	DNA-PKcs|DNAPK|DNPK1|HYRC|HYRC1|IMD26|XRCC7|p350	-	-	-	Low Throughput
277377	Bourbon NA (2001)	111831	111567	142.737	Affinity Capture-Western	physical	interacts with	-	5894 (interacts with) 5581	RAF1	PRKCE	9606	9606	-	11350735	-	-	BIOGRID	CMD1NN|CRAF|NS5|Raf-1|c-Raf	PKCE|nPKC-epsilon	-	-	-	Low Throughput
615973	Falck J (2005)	110763	107027	75.0458	Affinity Capture-Western	physical	interacts with	-	4683 (interacts with) 545	NBN	ATR	9606	9606	-	15758953	-	-	BIOGRID	AT-V1|AT-V2|ATV|NBS|NBS1|P95	FCTCS|FRP1|MEC1|SCKL|SCKL1	-	-	-	Low Throughput
503246	Bhoumik A (2005)	110763	107776	123.931	Co-localization	physical	interacts with	-	4683 (interacts with) 1386	NBN	ATF2	9606	9606	-	15916964	-	-	BIOGRID	AT-V1|AT-V2|ATV|NBS|NBS1|P95	CRE-BP1|CREB-2|CREB2|HB16|TREB7	-	-	-	Low Throughput
274676	Chen BC (2002)	106710	109863	270.23	Affinity Capture-Western	physical	interacts with	-	207 (interacts with) 3654	AKT1	IRAK1	9606	9606	-	11976320	-	-	BIOGRID	AKT|CWS6|PKB|PKB-ALPHA|PRKBA|RAC|RAC-ALPHA	IRAK|pelle	-	-	-	Low Throughput
244550	Kobayashi J (2002)	110763	109268	96.5138	Reconstituted Complex	physical	interacts with	-	4683 (interacts with) 3014	NBN	H2AFX	9606	9606	-	12419185	Interaction was reduced when anti-gamma-H2AX antibody was introduced into normal cells and was also delayed in AT cells, which lack the kinase activity for phosphorylation of H2AX;FHA/BRCT domain of NBS1 is essential for this physical interaction	-	BIOGRID	AT-V1|AT-V2|ATV|NBS|NBS1|P95	H2A.X|H2A/X|H2AX	-	-	-	Low Throughput
245712	Wang Y (2000)	110763	110438	66.5733	Co-purification	physical	interacts with	-	4683 (interacts with) 4292	NBN	MLH1	9606	9606	-	10783165	-	-	BIOGRID	AT-V1|AT-V2|ATV|NBS|NBS1|P95	COCA2|FCC2|HNPCC|HNPCC2|hMLH1	-	-	-	Low Throughput
245719	Wang Y (2000)	110763	110573	47.9124	Co-purification	physical	interacts with	-	4683 (interacts with) 4436	NBN	MSH2	9606	9606	-	10783165	-	-	BIOGRID	AT-V1|AT-V2|ATV|NBS|NBS1|P95	COCA1|FCC1|HNPCC|HNPCC1|LCFS2	-	-	-	Low Throughput
2268130	Huttlin EL (2017)	109586	106575	819.698	Affinity Capture-MS	physical	interacts with	-	3354 (interacts with) 60	HTR1E	ACTB	9606	9606	-	28514442	Quantitative scores are a modified CompPASS score derived from Sowa et al., Cell, 2009 (PMID 19615732). The cut-off threshold is > 0.75.	0.806213	BIOGRID	5-HT1E	BRWS1|PS1TP5BP1	-	-	-	High Throughput
905884	Miyamoto-Sato E (2010)	109930	115403	203.851	Reconstituted Complex	physical	interacts with	-	3727 (interacts with) 10096	JUND	ACTR3	9606	9606	-	20195357	Interaction from HTP screen was verified by pull-downs from in vitro translated proteins	-	BIOGRID	AP-1	ARP3	-	-	-	Low Throughput
2251795	Huttlin EL (2017)	109586	131362	286.051	Affinity Capture-MS	physical	interacts with	-	3354 (interacts with) 345651	HTR1E	ACTBL2	9606	9606	-	28514442	Quantitative scores are a modified CompPASS score derived from Sowa et al., Cell, 2009 (PMID 19615732). The cut-off threshold is > 0.75.	0.950032	BIOGRID	5-HT1E	ACT	-	-	-	High Throughput
868497	Zhu J (2013)	110245	110338	116.452	Affinity Capture-Luminescence	physical	interacts with	-	4067 (interacts with) 4170	LYN	MCL1	9606	9606	-	23503679	-	-	BIOGRID	JTK8|p53Lyn|p56Lyn	BCL2L3|EAT|MCL1-ES|MCL1L|MCL1S|Mcl-1|TM|bcl2-L-3|mcl1/EAT	-	-	-	High Throughput
287795	Yazgan O (2002)	109930	111585	182.877	Reconstituted Complex	physical	interacts with	-	3727 (interacts with) 5599	JUND	MAPK8	9606	9606	-	12052834	-	-	BIOGRID	AP-1	JNK|JNK-46|JNK1|JNK1A2|JNK21B1/2|PRKM8|SAPK1|SAPK1c	-	-	-	Low Throughput
2240757	Huttlin EL (2017)	109586	106994	637.007	Affinity Capture-MS	physical	interacts with	-	3354 (interacts with) 506	HTR1E	ATP5B	9606	9606	-	28514442	Quantitative scores are a modified CompPASS score derived from Sowa et al., Cell, 2009 (PMID 19615732). The cut-off threshold is > 0.75.|Re-analysis of the data from the first paper, The BioPlex Network: A Systematic Exploration of the Human Interactome, PUBMED:26186194	0.990899	BIOGRID	5-HT1E	ATPMB|ATPSB|HEL-S-271	-	-	-	High Throughput
288185	Tang K (2000)	106740	110186	1274.13	Affinity Capture-Western	physical	interacts with	-	239 (interacts with) 4000	ALOX12	LMNA	9606	9606	-	10727209	-	-	BIOGRID	12-LOX|12S-LOX|LOG12	CDCD1|CDDC|CMD1A|CMT2B1|EMD2|FPL|FPLD|FPLD2|HGPS|IDC|LDP1|LFP|LGMD1B|LMN1|LMNC|LMNL1|PRO1	-	RP11-54H19.1	-	Low Throughput
2261607	Huttlin EL (2017)	111439	106759	213.481	Affinity Capture-MS	physical	interacts with	-	5443 (interacts with) 262	POMC	AMD1	9606	9606	-	28514442	Quantitative scores are a modified CompPASS score derived from Sowa et al., Cell, 2009 (PMID 19615732). The cut-off threshold is > 0.75.	0.875259	BIOGRID	ACTH|CLIP|LPH|MSH|NPP|POC	ADOMETDC|AMD|SAMDC	-	RP11-397G5.3	-	High Throughput
568891	Huang YF (2009)	113123	113010	355.7	Biochemical Activity	physical	interacts with	Phosphorylation	7272 (interacts with) 7157	TTK	TP53	9606	9606	-	19332559	-	-	BIOGRID	CT96|ESK|MPH1|MPS1|MPS1L1|PYT	BCC7|LFS1|P53|TRP53	RP3-357D13.2	-	-	Low Throughput
738230	Olah J (2011)	113123	106848	466.607	Reconstituted Complex	physical	interacts with	-	7272 (interacts with) 351	TTK	APP	9606	9606	-	21832049	-	-	BIOGRID	CT96|ESK|MPH1|MPS1|MPS1L1|PYT	AAA|ABETA|ABPP|AD1|APPI|CTFgamma|CVAP|PN-II|PN2	RP3-357D13.2	-	-	High Throughput
868462	Zhu J (2013)	110245	111565	134.957	Affinity Capture-Luminescence	physical	interacts with	-	4067 (interacts with) 5579	LYN	PRKCB	9606	9606	-	23503679	-	-	BIOGRID	JTK8|p53Lyn|p56Lyn	PKC-beta|PKCB|PRKCB1|PRKCB2	-	-	-	High Throughput
727208	Nekhai S (1997)	113123	107452	153.22	Biochemical Activity	physical	interacts with	Phosphorylation	7272 (interacts with) 1017	TTK	CDK2	9606	9606	-	9311822	-	-	BIOGRID	CT96|ESK|MPH1|MPS1|MPS1L1|PYT	CDKN2|p33(CDK2)	RP3-357D13.2	-	-	Low Throughput
738496	Olah J (2011)	111439	106848	1865.78	Reconstituted Complex	physical	interacts with	-	5443 (interacts with) 351	POMC	APP	9606	9606	-	21832049	-	-	BIOGRID	ACTH|CLIP|LPH|MSH|NPP|POC	AAA|ABETA|ABPP|AD1|APPI|CTFgamma|CVAP|PN-II|PN2	-	-	-	High Throughput
868465	Zhu J (2013)	110245	106782	443.255	Affinity Capture-Luminescence	physical	interacts with	-	4067 (interacts with) 285	LYN	ANGPT2	9606	9606	-	23503679	-	-	BIOGRID	JTK8|p53Lyn|p56Lyn	AGPT2|ANG2	-	-	-	High Throughput
2460228	Ivanov AA (2017)	110573	108288	74.8235	FRET	physical	interacts with	-	4436 (interacts with) 1969	MSH2	EPHA2	9606	9606	-	28628118	Time-resolved fluorescence energy transfer (TR-FRET)	-	BIOGRID	COCA1|FCC1|HNPCC|HNPCC1|LCFS2	ARCC2|CTPA|CTPP1|CTRCT6|ECK	-	-	-	High Throughput
2460227	Ivanov AA (2017)	110573	106710	150.086	FRET	physical	interacts with	-	4436 (interacts with) 207	MSH2	AKT1	9606	9606	-	28628118	Time-resolved fluorescence energy transfer (TR-FRET)	-	BIOGRID	COCA1|FCC1|HNPCC|HNPCC1|LCFS2	AKT|CWS6|PKB|PKB-ALPHA|PRKBA|RAC|RAC-ALPHA	-	-	-	High Throughput
678876	Kaabeche K (2004)	110245	108554	178.204	Affinity Capture-Western	physical	interacts with	-	4067 (interacts with) 2263	LYN	FGFR2	9606	9606	-	15190072	figure 7.	-	BIOGRID	JTK8|p53Lyn|p56Lyn	BBDS|BEK|BFR-1|CD332|CEK3|CFD1|ECT1|JWS|K-SAM|KGFR|TK14|TK25	-	-	-	Low Throughput
679190	Ren X (2003)	110245	113010	647.204	Affinity Capture-Western	physical	interacts with	-	4067 (interacts with) 7157	LYN	TP53	9606	9606	-	12642697	-	-	BIOGRID	JTK8|p53Lyn|p56Lyn	BCC7|LFS1|P53|TRP53	-	-	-	Low Throughput
868450	Zhu J (2013)	110245	111095	170.286	Affinity Capture-Luminescence	physical	interacts with	-	4067 (interacts with) 5058	LYN	PAK1	9606	9606	-	23503679	-	-	BIOGRID	JTK8|p53Lyn|p56Lyn	PAKalpha	-	-	-	High Throughput
818458	Beard MB (1999)	110245	111170	146.08	Reconstituted Complex	physical	interacts with	-	4067 (interacts with) 5144	LYN	PDE4D	9606	9606	-	10571082	-	-	BIOGRID	JTK8|p53Lyn|p56Lyn	ACRDYS2|DPDE3|HSPDE4D|PDE43|PDE4DN2|STRK1	-	-	-	Low Throughput
2330202	Boldt K (2016)	110573	111831	97.5617	Affinity Capture-MS	physical	interacts with	-	4436 (interacts with) 5894	MSH2	RAF1	9606	9606	-	27173435	-	-	BIOGRID	COCA1|FCC1|HNPCC|HNPCC1|LCFS2	CMD1NN|CRAF|NS5|Raf-1|c-Raf	-	-	-	High Throughput
302086	Qiu W (1998)	110245	114934	99.3711	Affinity Capture-Western	physical	interacts with	-	4067 (interacts with) 9564	LYN	BCAR1	9606	9606	-	9581808	-	-	BIOGRID	JTK8|p53Lyn|p56Lyn	CAS|CAS1|CASS1|CRKAS|P130Cas	-	hCG_1980470	-	Low Throughput
925822	Kristensen AR (2012)	110573	112651	114.934	Co-fractionation	physical	interacts with	-	4436 (interacts with) 6774	MSH2	STAT3	9606	9606	-	22863883	-	-	BIOGRID	COCA1|FCC1|HNPCC|HNPCC1|LCFS2	ADMIO|APRF|HIES	-	-	-	High Throughput
316368	Li Y (1995)	110245	107823	260.929	Affinity Capture-Western	physical	interacts with	-	4067 (interacts with) 1436	LYN	CSF1R	9606	9606	-	7636265	-	-	BIOGRID	JTK8|p53Lyn|p56Lyn	C-FMS|CD115|CSF-1R|CSFR|FIM2|FMS|HDLS|M-CSF-R	-	-	-	Low Throughput
287427	Uddin S (1998)	110245	113148	158.362	Reconstituted Complex	physical	interacts with	-	4067 (interacts with) 7297	LYN	TYK2	9606	9606	-	9633884	-	-	BIOGRID	JTK8|p53Lyn|p56Lyn	IMD35|JTK1	-	-	-	Low Throughput
281865	Chin H (1998)	110245	109920	80.0045	Reconstituted Complex	physical	interacts with	-	4067 (interacts with) 3717	LYN	JAK2	9606	9606	-	9573010	-	-	BIOGRID	JTK8|p53Lyn|p56Lyn	JTK10|THCYT3	-	-	-	Low Throughput
286522	Kumar S (1998)	110245	111577	274.274	Reconstituted Complex	physical	interacts with	-	4067 (interacts with) 5591	LYN	PRKDC	9606	9606	-	9748231	-	-	BIOGRID	JTK8|p53Lyn|p56Lyn	DNA-PKcs|DNAPK|DNPK1|HYRC|HYRC1|IMD26|XRCC7|p350	-	-	-	Low Throughput
244055	Adamson AW (2005)	110573	107536	108.053	Affinity Capture-Western	physical	interacts with	-	4436 (interacts with) 1111	MSH2	CHEK1	9606	9606	-	15647386	Chk1 and Chk2 interact with the MMR protein MSH2 and this interaction is enhanced following MNNG exposure, supporting the notion that the MMR system functions as a molecular scaffold at the sites of DNA damage	-	BIOGRID	COCA1|FCC1|HNPCC|HNPCC1|LCFS2	CHK1	-	-	-	Low Throughput
2524748	Zhang Y (2018)	107842	114368	201.763	Affinity Capture-Western	physical	interacts with	-	1459 (interacts with) 8841	CSNK2A2	HDAC3	9606	9606	-	29555935	-	-	BIOGRID	CK2A2|CSNK2A1	HD3|RPD3|RPD3-2	-	-	-	Low Throughput
1263841	Wan C (2015)	106956	109929	68.4499	Co-fractionation	physical	interacts with	-	466 (interacts with) 3726	ATF1	JUNB	9606	9606	-	26344197	Fractionation was combined with mass spectrometry from five diverse animal species to predict co-complex protein interactions conserved across metazoa using an integrative computational scoring procedure along with an SVM approach. The significant data set of 16655 PPI, was derived from a set of more than 1M interactions by examining a ROC curve of predicted interactions against reference annotat…	0.378436	BIOGRID	EWS-ATF1|FUS/ATF-1|TREB36	AP-1	-	-	-	High Throughput
245350	Wang Y (2000)	110573	106962	50.7555	Co-purification	physical	interacts with	-	4436 (interacts with) 472	MSH2	ATM	9606	9606	-	10783165	-	-	BIOGRID	COCA1|FCC1|HNPCC|HNPCC1|LCFS2	AT1|ATA|ATC|ATD|ATDC|ATE|TEL1|TELO1	-	-	-	Low Throughput
2533411	Keller DM (2002)	107842	113010	1022.91	Biochemical Activity	physical	interacts with	Phosphorylation	1459 (interacts with) 7157	CSNK2A2	TP53	9606	9606	-	12393879	-	-	BIOGRID	CK2A2|CSNK2A1	BCC7|LFS1|P53|TRP53	-	-	-	Low Throughput
2533414	Keller DM (2002)	107842	114181	95.5557	Biochemical Activity	physical	interacts with	Phosphorylation	1459 (interacts with) 8626	CSNK2A2	TP63	9606	9606	-	12393879	-	-	BIOGRID	CK2A2|CSNK2A1	AIS|B(p51A)|B(p51B)|EEC3|KET|LMS|NBP|OFC8|RHS|SHFM4|TP53CP|TP53L|TP73L|p40|p51|p53CP|p63|p73H|p73L	-	-	-	Low Throughput
2383353	Lee JH (2016)	115373	112649	491.62	Affinity Capture-Western	physical	interacts with	-	10062 (interacts with) 6772	NR1H3	STAT1	9606	9606	-	27485016	-	-	BIOGRID	LXR-a|LXRA|RLD-1	CANDF7|IMD31A|IMD31B|IMD31C|ISGF-3|STAT91	-	-	-	Low Throughput
2383345	Lee JH (2016)	115373	107067	261.958	Affinity Capture-MS	physical	interacts with	-	10062 (interacts with) 595	NR1H3	CCND1	9606	9606	-	27485016	-	-	BIOGRID	LXR-a|LXRA|RLD-1	BCL1|D11S287E|PRAD1|U21B31	-	-	-	Low Throughput
2225110	Huttlin EL (2017)	107842	107083	161.242	Affinity Capture-MS	physical	interacts with	-	1459 (interacts with) 613	CSNK2A2	BCR	9606	9606	-	28514442	Quantitative scores are a modified CompPASS score derived from Sowa et al., Cell, 2009 (PMID 19615732). The cut-off threshold is > 0.75.|Re-analysis of the data from the first paper, The BioPlex Network: A Systematic Exploration of the Human Interactome, PUBMED:26186194	0.999959	BIOGRID	CK2A2|CSNK2A1	ALL|BCR1|CML|D22S11|D22S662|PHL	-	-	-	High Throughput
2383351	Lee JH (2016)	115373	115106	265.391	Affinity Capture-Western	physical	interacts with	-	10062 (interacts with) 9759	NR1H3	HDAC4	9606	9606	-	27485016	-	-	BIOGRID	LXR-a|LXRA|RLD-1	AHO3|BDMR|HA6116|HD4|HDAC-4|HDAC-A|HDACA	-	-	-	Low Throughput
2246521	Huttlin EL (2017)	115373	111177	1738	Affinity Capture-MS	physical	interacts with	-	10062 (interacts with) 5151	NR1H3	PDE8A	9606	9606	-	28514442	Quantitative scores are a modified CompPASS score derived from Sowa et al., Cell, 2009 (PMID 19615732). The cut-off threshold is > 0.75.	0.974732	BIOGRID	LXR-a|LXRA|RLD-1	HsT19550	-	-	-	High Throughput
2516519	Onnis B (2013)	108636	113265	173.097	Co-localization	physical	interacts with	-	2353 (interacts with) 7422	FOS	VEGFA	9606	9606	-	23549086	ChIP	-	BIOGRID	AP-1|C-FOS|p55	MVCD1|VEGF|VPF	-	RP1-261G23.1	-	Low Throughput
1438052	Yu H (2011)	115373	112170	154.705	Two-hybrid	physical	interacts with	-	10062 (interacts with) 6258	NR1H3	RXRG	9606	9606	-	21516116	-	-	BIOGRID	LXR-a|LXRA|RLD-1	NR2B3|RXRC	-	-	-	High Throughput
918893	Weimann M (2013)	115373	116667	286.404	Two-hybrid	physical	interacts with	-	10062 (interacts with) 23028	NR1H3	KDM1A	9606	9606	-	23455924	Hit identified by mass spec	-	BIOGRID	LXR-a|LXRA|RLD-1	AOF2|BHC110|KDM1|LSD1	-	RP1-184J9.1	-	High Throughput
2224227	Huttlin EL (2017)	107842	123991	1738	Affinity Capture-MS	physical	interacts with	-	1459 (interacts with) 84264	CSNK2A2	HAGHL	9606	9606	-	28514442	Quantitative scores are a modified CompPASS score derived from Sowa et al., Cell, 2009 (PMID 19615732). The cut-off threshold is > 0.75.|Re-analysis of the data from the first paper, The BioPlex Network: A Systematic Exploration of the Human Interactome, PUBMED:26186194	0.999977	BIOGRID	CK2A2|CSNK2A1	-	-	-	-	High Throughput
2219746	Huttlin EL (2017)	108636	107776	78.6548	Affinity Capture-MS	physical	interacts with	-	2353 (interacts with) 1386	FOS	ATF2	9606	9606	-	28514442	Quantitative scores are a modified CompPASS score derived from Sowa et al., Cell, 2009 (PMID 19615732). The cut-off threshold is > 0.75.|Re-analysis of the data from the first paper, The BioPlex Network: A Systematic Exploration of the Human Interactome, PUBMED:26186194	0.999999	BIOGRID	AP-1|C-FOS|p55	CRE-BP1|CREB-2|CREB2|HB16|TREB7	-	-	-	High Throughput
669104	Nader N (2012)	115373	109165	246.937	Two-hybrid	physical	interacts with	-	10062 (interacts with) 2908	NR1H3	NR3C1	9606	9606	-	22457708	figure 1. LXRs repress GR-induced transcriptional activity in HCT116 cells.|figure 2. Over-expression of LXRa regulates dexamethasone-stimulated GR transcriptional activity in a gene promoter-specific way	-	BIOGRID	LXR-a|LXRA|RLD-1	GCCR|GCR|GCRST|GR|GRL	-	-	-	Low Throughput
574359	Albers M (2005)	115373	112169	142.237	Two-hybrid	physical	interacts with	-	10062 (interacts with) 6257	NR1H3	RXRB	9606	9606	-	15604093	-	-	BIOGRID	LXR-a|LXRA|RLD-1	DAUDI6|H-2RIIBP|NR2B2|RCoR-1	-	DADB-100D22.1	-	Low Throughput
738398	Olah J (2011)	115373	106848	1419.43	Reconstituted Complex	physical	interacts with	-	10062 (interacts with) 351	NR1H3	APP	9606	9606	-	21832049	-	-	BIOGRID	LXR-a|LXRA|RLD-1	AAA|ABETA|ABPP|AD1|APPI|CTFgamma|CVAP|PN-II|PN2	-	-	-	High Throughput
574355	Albers M (2005)	115373	114973	186.109	Two-hybrid	physical	interacts with	-	10062 (interacts with) 9611	NR1H3	NCOR1	9606	9606	-	15604093	-	-	BIOGRID	LXR-a|LXRA|RLD-1	N-CoR|N-CoR1|PPP1R109|TRAC1|hN-CoR	-	-	-	Low Throughput
574354	Albers M (2005)	115373	113841	264.485	Two-hybrid	physical	interacts with	-	10062 (interacts with) 8202	NR1H3	NCOA3	9606	9606	-	15604093	-	-	BIOGRID	LXR-a|LXRA|RLD-1	ACTR|AIB-1|AIB1|CAGH16|CTG26|KAT13B|RAC3|SRC-3|SRC3|TNRC14|TNRC16|TRAM-1|bHLHe42|pCIP	-	RP5-1049G16.3	-	Low Throughput
2220174	Huttlin EL (2017)	108636	109930	109.499	Affinity Capture-MS	physical	interacts with	-	2353 (interacts with) 3727	FOS	JUND	9606	9606	-	28514442	Quantitative scores are a modified CompPASS score derived from Sowa et al., Cell, 2009 (PMID 19615732). The cut-off threshold is > 0.75.|Re-analysis of the data from the first paper, The BioPlex Network: A Systematic Exploration of the Human Interactome, PUBMED:26186194	0.999999	BIOGRID	AP-1|C-FOS|p55	AP-1	-	-	-	High Throughput
574349	Albers M (2005)	115373	108598	204.466	Two-hybrid	physical	interacts with	-	10062 (interacts with) 2309	NR1H3	FOXO3	9606	9606	-	15604093	-	-	BIOGRID	LXR-a|LXRA|RLD-1	AF6q21|FKHRL1|FKHRL1P2|FOXO2|FOXO3A	-	-	-	Low Throughput
574351	Albers M (2005)	115373	112168	144.871	Two-hybrid	physical	interacts with	-	10062 (interacts with) 6256	NR1H3	RXRA	9606	9606	-	15604093	-	-	BIOGRID	LXR-a|LXRA|RLD-1	NR2B1	-	-	-	Low Throughput
1506212	Li X (2015)	108636	111587	72.3054	Affinity Capture-MS	physical	interacts with	-	2353 (interacts with) 5601	FOS	MAPK9	9606	9606	-	25609649	High-confidence interactions	-	BIOGRID	AP-1|C-FOS|p55	JNK-55|JNK2|JNK2A|JNK2ALPHA|JNK2B|JNK2BETA|PRKM9|SAPK|SAPK1a|p54a|p54aSAPK	-	-	-	High Throughput
1506210	Li X (2015)	108636	108637	701.179	Affinity Capture-MS	physical	interacts with	-	2353 (interacts with) 2354	FOS	FOSB	9606	9606	-	25609649	High-confidence interactions	-	BIOGRID	AP-1|C-FOS|p55	AP-1|G0S3|GOS3|GOSB	-	-	-	High Throughput
331184	Li X (2007)	115373	116983	284.316	Affinity Capture-Western	physical	interacts with	-	10062 (interacts with) 23411	NR1H3	SIRT1	9606	9606	-	17936707	not confirmed human	-	BIOGRID	LXR-a|LXRA|RLD-1	SIR2L1	-	RP11-57G10.3	-	Low Throughput
2205279	Fukai J (2008)	108357	108551	256.035	Affinity Capture-Western	physical	interacts with	-	2043 (interacts with) 2260	EPHA4	FGFR1	9606	9606	-	18790757	-	-	BIOGRID	HEK8|SEK|TYRO1	BFGFR|CD331|CEK|FGFBR|FGFR-1|FLG|FLT-2|FLT2|HBGFR|HH2|HRTFDS|KAL2|N-SAM|OGD|bFGF-R-1	-	-	-	Low Throughput
1506202	Li X (2015)	108636	116369	102.685	Affinity Capture-MS	physical	interacts with	-	2353 (interacts with) 11200	FOS	CHEK2	9606	9606	-	25609649	High-confidence interactions	-	BIOGRID	AP-1|C-FOS|p55	CDS1|CHK2|HuCds1|LFS2|PP1425|RAD53|hCds1	-	RP11-436C9.1	-	High Throughput
1506187	Li X (2015)	108636	106696	182.296	Affinity Capture-MS	physical	interacts with	-	2353 (interacts with) 191	FOS	AHCY	9606	9606	-	25609649	High-confidence interactions	-	BIOGRID	AP-1|C-FOS|p55	SAHH|adoHcyase	-	-	-	High Throughput
2232879	Huttlin EL (2017)	119994	106722	1738	Affinity Capture-MS	physical	interacts with	-	54498 (interacts with) 220	SMOX	ALDH1A3	9606	9606	-	28514442	Quantitative scores are a modified CompPASS score derived from Sowa et al., Cell, 2009 (PMID 19615732). The cut-off threshold is > 0.75.	0.998776	BIOGRID	C20orf16|PAO|PAO-1|PAO1|PAOH|PAOH1|SMO	ALDH1A6|ALDH6|MCOP8|RALDH3	RP4-779E11.4	RP11-66B24.1	-	High Throughput
1038388	Rolland T (2014)	108636	111550	230.955	Two-hybrid	physical	interacts with	-	2353 (interacts with) 5563	FOS	PRKAA2	9606	9606	-	25416956	-	-	BIOGRID	AP-1|C-FOS|p55	AMPK|AMPK2|AMPKa2|PRKAA	-	-	-	High Throughput
1035674	Adler J (2010)	108636	108072	195.649	Co-localization	physical	interacts with	-	2353 (interacts with) 1728	FOS	NQO1	9606	9606	-	20498278	-	-	BIOGRID	AP-1|C-FOS|p55	DHQU|DIA4|DTD|NMOR1|NMORI|QR1	-	-	-	Low Throughput
905923	Miyamoto-Sato E (2010)	108636	109535	153.966	Reconstituted Complex	physical	interacts with	-	2353 (interacts with) 3303	FOS	HSPA1A	9606	9606	-	20195357	Protein-protein interactions detected between proteins translated in vitro	-	BIOGRID	AP-1|C-FOS|p55	HEL-S-103|HSP70-1|HSP70-1A|HSP70I|HSP72|HSPA1	-	DAQB-147D11.1	-	High Throughput
2232635	Huttlin EL (2017)	107952	111330	1738	Affinity Capture-MS	physical	interacts with	-	1580 (interacts with) 5313	CYP4B1	PKLR	9606	9606	-	28514442	Quantitative scores are a modified CompPASS score derived from Sowa et al., Cell, 2009 (PMID 19615732). The cut-off threshold is > 0.75.	0.998875	BIOGRID	CYPIVB1|P-450HP	PK1|PKL|PKR|PKRL|RPK	RP4-732G19.1	-	-	High Throughput
905853	Miyamoto-Sato E (2010)	108636	107603	250.884	Reconstituted Complex	physical	interacts with	-	2353 (interacts with) 1191	FOS	CLU	9606	9606	-	20195357	Interaction from HTP screen was verified by pull-downs from in vitro translated proteins|Protein-protein interactions detected between proteins translated in vitro	-	BIOGRID	AP-1|C-FOS|p55	APO-J|APOJ|CLI|CLU1|CLU2|KUB1|NA1/NA2|SGP-2|SGP2|SP-40|TRPM-2|TRPM2	-	AAG4	-	High Throughput|Low Throughput
905854	Miyamoto-Sato E (2010)	108636	106848	866.022	Reconstituted Complex	physical	interacts with	-	2353 (interacts with) 351	FOS	APP	9606	9606	-	20195357	Interaction from HTP screen was verified by pull-downs from in vitro translated proteins|Protein-protein interactions detected between proteins translated in vitro	-	BIOGRID	AP-1|C-FOS|p55	AAA|ABETA|ABPP|AD1|APPI|CTFgamma|CVAP|PN-II|PN2	-	-	-	High Throughput|Low Throughput
941092	Varjosalo M (2013)	107842	112285	710.65	Affinity Capture-MS	physical	interacts with	-	1459 (interacts with) 6383	CSNK2A2	SDC2	9606	9606	-	23455922	exogenous expression of bait	-	BIOGRID	CK2A2|CSNK2A1	CD362|HSPG|HSPG1|SYND2	-	-	-	High Throughput
530471	Baron S (2007)	108636	108403	204.665	Affinity Capture-Western	physical	interacts with	-	2353 (interacts with) 2099	FOS	ESR1	9606	9606	-	17317669	-	-	BIOGRID	AP-1|C-FOS|p55	ER|ESR|ESRA|ESTRR|Era|NR3A1	-	RP1-130E4.1	-	Low Throughput
675127	Lee SY (2011)	108636	110263	143.331	Affinity Capture-Western	physical	interacts with	-	2353 (interacts with) 4088	FOS	SMAD3	9606	9606	-	21829441	-	-	BIOGRID	AP-1|C-FOS|p55	HSPC193|HsT17436|JV15-2|LDS1C|LDS3|MADH3	-	-	-	Low Throughput
941086	Varjosalo M (2013)	107842	108530	337.51	Affinity Capture-MS	physical	interacts with	-	1459 (interacts with) 2239	CSNK2A2	GPC4	9606	9606	-	23455922	exogenous expression of bait	-	BIOGRID	CK2A2|CSNK2A1	K-glypican	-	RP6-198C21.1	-	High Throughput
481665	Fauquier L (2008)	108636	113841	115.839	Affinity Capture-Western	physical	interacts with	-	2353 (interacts with) 8202	FOS	NCOA3	9606	9606	-	18511550	-	-	BIOGRID	AP-1|C-FOS|p55	ACTR|AIB-1|AIB1|CAGH16|CTG26|KAT13B|RAC3|SRC-3|SRC3|TNRC14|TNRC16|TRAM-1|bHLHe42|pCIP	-	RP5-1049G16.3	-	Low Throughput
796866	Nead MA (1998)	108636	111860	130.929	Reconstituted Complex	physical	interacts with	-	2353 (interacts with) 5925	FOS	RB1	9606	9606	-	9545246	-	-	BIOGRID	AP-1|C-FOS|p55	OSRC|PPP1R130|RB|p105-Rb|pRb|pp110	-	RP11-174I10.1	-	Low Throughput
262993	Yamaguchi Y (1998)	108636	107841	168.617	Far Western	physical	interacts with	-	2353 (interacts with) 1457	FOS	CSNK2A1	9606	9606	-	9685505	-	-	BIOGRID	AP-1|C-FOS|p55	CK2A1|CKII|CSNK2A3	-	-	-	Low Throughput
426821	Kumar NV (2001)	108636	111580	115.315	Affinity Capture-Western	physical	interacts with	-	2353 (interacts with) 5594	FOS	MAPK1	9606	9606	-	11431474	-	-	BIOGRID	AP-1|C-FOS|p55	ERK|ERK-2|ERK2|ERT1|MAPK2|P42MAPK|PRKM1|PRKM2|p38|p40|p41|p41mapk|p42-MAPK	-	-	-	Low Throughput
2549932	Shekar SC (2005)	111902	111308	258.892	Reconstituted Complex	physical	interacts with	-	5970 (interacts with) 5290	RELA	PIK3CA	9606	9606	-	15932879	-	-	BIOGRID	NFKB3|p65	CLOVE|CWS5|MCAP|MCM|MCMTC|PI3K|p110-alpha	-	-	-	Low Throughput
892765	Wang J (2011)	107842	112910	202.979	Two-hybrid	physical	interacts with	-	1459 (interacts with) 7052	CSNK2A2	TGM2	9606	9606	-	21988832	-	-	BIOGRID	CK2A2|CSNK2A1	G-ALPHA-h|GNAH|HEL-S-45|TG2|TGC	-	RP5-1054A22.2	-	High Throughput
2592626	Wu Z (2011)	111902	110857	95.7001	Affinity Capture-Western	physical	interacts with	-	5970 (interacts with) 4790	RELA	NFKB1	9606	9606	-	21483817	-	-	BIOGRID	NFKB3|p65	EBP-1|KBF1|NF-kB1|NF-kappa-B|NF-kappaB|NFKB-p105|NFKB-p50|NFkappaB|p105|p50	-	-	-	Low Throughput
2230923	Huttlin EL (2017)	110703	107819	1738	Affinity Capture-MS	physical	interacts with	-	4618 (interacts with) 1432	MYF6	MAPK14	9606	9606	-	28514442	Quantitative scores are a modified CompPASS score derived from Sowa et al., Cell, 2009 (PMID 19615732). The cut-off threshold is > 0.75.	0.99939	BIOGRID	CNM3|MRF4|bHLHc4|myf-6	CSBP|CSBP1|CSBP2|CSPB1|EXIP|Mxi2|PRKM14|PRKM15|RK|SAPK2A|p38|p38ALPHA	-	RP1-179N16.5	-	High Throughput
262833	Srivenugopal KS (2000)	107842	110411	153.826	Biochemical Activity	physical	interacts with	Phosphorylation	1459 (interacts with) 4255	CSNK2A2	MGMT	9606	9606	-	10667577	-	-	BIOGRID	CK2A2|CSNK2A1	-	-	RP11-109A6.1	-	Low Throughput
262819	Durban E (1985)	107842	113003	189.903	Biochemical Activity	physical	interacts with	Phosphorylation	1459 (interacts with) 7150	CSNK2A2	TOP1	9606	9606	-	2998765	-	-	BIOGRID	CK2A2|CSNK2A1	TOPI	-	RP3-511B24.1	-	Low Throughput
262823	Wang D (2000)	107842	111902	345.637	Biochemical Activity	physical	interacts with	Phosphorylation	1459 (interacts with) 5970	CSNK2A2	RELA	9606	9606	-	10938077	-	-	BIOGRID	CK2A2|CSNK2A1	NFKB3|p65	-	-	-	Low Throughput
748970	Havugimana PC (2012)	107842	113006	205.634	Co-fractionation	physical	interacts with	-	1459 (interacts with) 7153	CSNK2A2	TOP2A	9606	9606	-	22939629	Denoised score >= 0.75	0.854	BIOGRID	CK2A2|CSNK2A1	TOP2|TP2A	-	-	-	High Throughput
2489664	Banks CA (2016)	111902	115987	634.042	Affinity Capture-MS	physical	interacts with	-	5970 (interacts with) 10768	RELA	AHCYL1	9606	9606	-	27609421	-	-	BIOGRID	NFKB3|p65	DCAL|IRBIT|PPP1R78|PRO0233|XPVKONA	-	-	-	High Throughput
2260119	Huttlin EL (2017)	107933	116107	1738	Affinity Capture-MS	physical	interacts with	-	1555 (interacts with) 10901	CYP2B6	DHRS4	9606	9606	-	28514442	Quantitative scores are a modified CompPASS score derived from Sowa et al., Cell, 2009 (PMID 19615732). The cut-off threshold is > 0.75.	0.88905	BIOGRID	CPB6|CYP2B|CYP2B7|CYP2B7P|CYPIIB6|EFVM|IIB1|P450	CR|NRDR|PHCR|PSCD|SCAD-SRL|SDR-SRL|SDR25C1|SDR25C2	-	UNQ851/PRO1800	-	High Throughput
2489652	Banks CA (2016)	111902	111580	199.618	Affinity Capture-MS	physical	interacts with	-	5970 (interacts with) 5594	RELA	MAPK1	9606	9606	-	27609421	-	-	BIOGRID	NFKB3|p65	ERK|ERK-2|ERK2|ERT1|MAPK2|P42MAPK|PRKM1|PRKM2|p38|p40|p41|p41mapk|p42-MAPK	-	-	-	High Throughput
2489657	Banks CA (2016)	111902	115391	713.253	Affinity Capture-MS	physical	interacts with	-	5970 (interacts with) 10082	RELA	GPC6	9606	9606	-	27609421	-	-	BIOGRID	NFKB3|p65	OMIMD1	-	UNQ369/PRO705	-	High Throughput
2489648	Banks CA (2016)	111902	108530	968.368	Affinity Capture-MS	physical	interacts with	-	5970 (interacts with) 2239	RELA	GPC4	9606	9606	-	27609421	-	-	BIOGRID	NFKB3|p65	K-glypican	-	RP6-198C21.1	-	High Throughput
2460633	Ivanov AA (2017)	111902	107334	135.755	FRET	physical	interacts with	-	5970 (interacts with) 894	RELA	CCND2	9606	9606	-	28628118	Time-resolved fluorescence energy transfer (TR-FRET)	-	BIOGRID	NFKB3|p65	KIAK0002|MPPH3	-	-	-	High Throughput
2460634	Ivanov AA (2017)	111902	109701	181.446	FRET	physical	interacts with	-	5970 (interacts with) 3480	RELA	IGF1R	9606	9606	-	28628118	Time-resolved fluorescence energy transfer (TR-FRET)	-	BIOGRID	NFKB3|p65	CD221|IGFIR|IGFR|JTK13	-	-	-	High Throughput
2460631	Ivanov AA (2017)	111902	106898	204.152	FRET	physical	interacts with	-	5970 (interacts with) 405	RELA	ARNT	9606	9606	-	28628118	Time-resolved fluorescence energy transfer (TR-FRET)	-	BIOGRID	NFKB3|p65	HIF-1-beta|HIF-1beta|HIF1-beta|HIF1B|HIF1BETA|TANGO|bHLHe2	-	-	-	High Throughput
2460632	Ivanov AA (2017)	111902	112666	262.435	FRET	physical	interacts with	-	5970 (interacts with) 6790	RELA	AURKA	9606	9606	-	28628118	Time-resolved fluorescence energy transfer (TR-FRET)	-	BIOGRID	NFKB3|p65	AIK|ARK1|AURA|AURORA2|BTAK|PPP1R47|STK15|STK6|STK7	-	RP5-1167H4.6	-	High Throughput
1513547	Pacaud R (2014)	111902	108126	344.753	Co-localization	physical	interacts with	-	5970 (interacts with) 1789	RELA	DNMT3B	9606	9606	-	24952347	Figure 4|Proximity Ligation In Situ Assay	-	BIOGRID	NFKB3|p65	ICF|ICF1|M.HsaIIIB	-	RP5-1085F17.2	-	Low Throughput
2454890	Kumar S (2012)	111902	112910	174.7	Co-localization	physical	interacts with	-	5970 (interacts with) 7052	RELA	TGM2	9606	9606	-	23185316	re-ChIP	-	BIOGRID	NFKB3|p65	G-ALPHA-h|GNAH|HEL-S-45|TG2|TGC	-	RP5-1054A22.2	-	Low Throughput
2459046	Ivanov AA (2017)	111902	108288	146.115	FRET	physical	interacts with	-	5970 (interacts with) 1969	RELA	EPHA2	9606	9606	-	28628118	Time-resolved fluorescence energy transfer (TR-FRET)	-	BIOGRID	NFKB3|p65	ARCC2|CTPA|CTPP1|CTRCT6|ECK	-	-	-	High Throughput
1535115	Lepley RA (1998)	111902	106741	1286.34	Affinity Capture-Western	physical	interacts with	-	5970 (interacts with) 240	RELA	ALOX5	9606	9606	-	9681993	-	-	BIOGRID	NFKB3|p65	5-LO|5-LOX|5LPG|LOG5	-	RP11-67C2.3	-	Low Throughput
2462257	Hauri S (2016)	116123	115457	307.484	Affinity Capture-MS	physical	interacts with	-	10919 (interacts with) 10155	EHMT2	TRIM28	9606	9606	-	27705803	-	-	BIOGRID	BAT8|C6orf30|G9A|GAT8|KMT1C|NG36	KAP1|PPP1R157|RNF96|TF1B|TIF1B	DAAP-66K18.3	-	-	High Throughput
1034339	Veena MS (2014)	111902	107454	177.236	Affinity Capture-Western	physical	interacts with	-	5970 (interacts with) 1019	RELA	CDK4	9606	9606	-	25331947	figure 6.	-	BIOGRID	NFKB3|p65	CMM3|PSK-J3	-	-	-	Low Throughput
1034340	Veena MS (2014)	111902	107067	129.125	Affinity Capture-Western	physical	interacts with	-	5970 (interacts with) 595	RELA	CCND1	9606	9606	-	25331947	figure 6.	-	BIOGRID	NFKB3|p65	BCL1|D11S287E|PRAD1|U21B31	-	-	-	Low Throughput
2462245	Hauri S (2016)	116123	114579	252.737	Affinity Capture-MS	physical	interacts with	-	10919 (interacts with) 9131	EHMT2	AIFM1	9606	9606	-	27705803	-	-	BIOGRID	BAT8|C6orf30|G9A|GAT8|KMT1C|NG36	AIF|CMT2D|CMTX4|COWCK|COXPD6|NADMR|NAMSD|PDCD8	DAAP-66K18.3	RP3-438D16.2	-	High Throughput
1034324	Veena MS (2014)	111902	138656	707.187	Affinity Capture-MS	physical	interacts with	-	5970 (interacts with) 445582	RELA	POTEE	9606	9606	-	25331947	table 2.	-	BIOGRID	NFKB3|p65	A26C1|A26C1A|CT104.2|POTE-2|POTE2|POTE2gamma	-	-	-	Low Throughput
1034331	Veena MS (2014)	111902	111577	234.589	Affinity Capture-MS	physical	interacts with	-	5970 (interacts with) 5591	RELA	PRKDC	9606	9606	-	25331947	table 2.	-	BIOGRID	NFKB3|p65	DNA-PKcs|DNAPK|DNPK1|HYRC|HYRC1|IMD26|XRCC7|p350	-	-	-	Low Throughput
2462247	Hauri S (2016)	116123	122908	65.1074	Affinity Capture-MS	physical	interacts with	-	10919 (interacts with) 79813	EHMT2	EHMT1	9606	9606	-	27705803	-	-	BIOGRID	BAT8|C6orf30|G9A|GAT8|KMT1C|NG36	EUHMTASE1|Eu-HMTase1|FP13812|GLP|GLP1|KMT1D|bA188C12.1	DAAP-66K18.3	RP11-188C12.1	-	High Throughput
950673	Dhar K (2013)	111902	112651	310.009	Affinity Capture-Western	physical	interacts with	-	5970 (interacts with) 6774	RELA	STAT3	9606	9606	-	23335796	-	-	BIOGRID	NFKB3|p65	ADMIO|APRF|HIES	-	-	-	Low Throughput
1438320	Yu H (2011)	116123	123627	2883.79	Two-hybrid	physical	interacts with	-	10919 (interacts with) 81926	EHMT2	ABHD17A	9606	9606	-	21516116	-	-	BIOGRID	BAT8|C6orf30|G9A|GAT8|KMT1C|NG36	C19orf27|FAM108A1	DAAP-66K18.3	-	-	High Throughput
1034322	Veena MS (2014)	111902	576066	590.544	Affinity Capture-MS	physical	interacts with	-	5970 (interacts with) 653781	RELA	POTEJ	9606	9606	-	25331947	table 2.	-	BIOGRID	NFKB3|p65	POTE2beta	-	-	-	Low Throughput
832392	Bantscheff M (2011)	116123	109316	186.254	Affinity Capture-MS	physical	interacts with	-	10919 (interacts with) 3066	EHMT2	HDAC2	9606	9606	-	21258344	-	-	BIOGRID	BAT8|C6orf30|G9A|GAT8|KMT1C|NG36	HD2|RPD3|YAF1	DAAP-66K18.3	-	-	Low Throughput
893908	Wang J (2011)	111902	110263	279.792	Two-hybrid	physical	interacts with	-	5970 (interacts with) 4088	RELA	SMAD3	9606	9606	-	21988832	-	-	BIOGRID	NFKB3|p65	HSPC193|HsT17436|JV15-2|LDS1C|LDS3|MADH3	-	-	-	High Throughput
948563	Lusic M (2013)	116123	111384	319.95	Affinity Capture-Western	physical	interacts with	-	10919 (interacts with) 5371	EHMT2	PML	9606	9606	-	23768491	figure 5.	-	BIOGRID	BAT8|C6orf30|G9A|GAT8|KMT1C|NG36	MYL|PP8675|RNF71|TRIM19	DAAP-66K18.3	-	-	Low Throughput
894107	Wang J (2011)	111902	112210	323.353	Two-hybrid	physical	interacts with	-	5970 (interacts with) 6303	RELA	SAT1	9606	9606	-	21988832	-	-	BIOGRID	NFKB3|p65	DC21|KFSD|KFSDX|SAT|SSAT|SSAT-1	-	-	-	High Throughput
683598	Ryo A (2003)	111902	106573	205.981	Affinity Capture-MS	physical	interacts with	-	5970 (interacts with) 58	RELA	ACTA1	9606	9606	-	14690596	-	-	BIOGRID	NFKB3|p65	ACTA|ASMA|CFTD|CFTD1|CFTDM|MPFD|NEM1|NEM2|NEM3	-	RP5-1068B5.2	-	Low Throughput
589304	Shi Y (2003)	116123	113895	199.277	Biochemical Activity	physical	interacts with	Methylation	10919 (interacts with) 8290	EHMT2	HIST3H3	9606	9606	-	12700765	CtBP complex methylates H3	-	BIOGRID	BAT8|C6orf30|G9A|GAT8|KMT1C|NG36	H3.4|H3/g|H3FT|H3t	DAAP-66K18.3	-	-	Low Throughput
683601	Ryo A (2003)	111902	114203	376.657	Affinity Capture-Western	physical	interacts with	-	5970 (interacts with) 8651	RELA	SOCS1	9606	9606	-	14690596	-	-	BIOGRID	NFKB3|p65	CIS1|CISH1|JAB|SOCS-1|SSI-1|SSI1|TIP3	-	-	-	Low Throughput
555024	Huang J (2010)	116123	113010	1047.5	Biochemical Activity	physical	interacts with	Methylation	10919 (interacts with) 7157	EHMT2	TP53	9606	9606	-	20118233	-	-	BIOGRID	BAT8|C6orf30|G9A|GAT8|KMT1C|NG36	BCC7|LFS1|P53|TRP53	DAAP-66K18.3	-	-	Low Throughput
737425	Rubio MF (2006)	111902	108403	271.721	Affinity Capture-Western	physical	interacts with	-	5970 (interacts with) 2099	RELA	ESR1	9606	9606	-	16331275	figure 5.	-	BIOGRID	NFKB3|p65	ER|ESR|ESRA|ESTRR|Era|NR3A1	-	RP1-130E4.1	-	Low Throughput
601766	Vinayagam A (2011)	111902	107819	291.391	Two-hybrid	physical	interacts with	-	5970 (interacts with) 1432	RELA	MAPK14	9606	9606	-	21900206	-	-	BIOGRID	NFKB3|p65	CSBP|CSBP1|CSBP2|CSPB1|EXIP|Mxi2|PRKM14|PRKM15|RK|SAPK2A|p38|p38ALPHA	-	RP1-179N16.5	-	High Throughput
316213	Caldenhoven E (1995)	111902	109165	189.382	Reconstituted Complex	physical	interacts with	-	5970 (interacts with) 2908	RELA	NR3C1	9606	9606	-	7659084	-	-	BIOGRID	NFKB3|p65	GCCR|GCR|GCRST|GR|GRL	-	-	-	Low Throughput
277053	Guan E (1996)	111902	110913	157.61	Affinity Capture-Western	physical	interacts with	-	5970 (interacts with) 4851	RELA	NOTCH1	9606	9606	-	8642313	-	-	BIOGRID	NFKB3|p65	AOS5|AOVD1|TAN1|hN1	-	-	-	Low Throughput
279339	Delerive P (1999)	111902	111461	409.328	Reconstituted Complex	physical	interacts with	-	5970 (interacts with) 5465	RELA	PPARA	9606	9606	-	10542237	-	-	BIOGRID	NFKB3|p65	NR1C1|PPAR|PPARalpha|hPPAR	-	SC22CB-5E3.5	-	Low Throughput
276336	Yang J (2001)	111902	111507	220.784	Reconstituted Complex	physical	interacts with	-	5970 (interacts with) 5515	RELA	PPP2CA	9606	9606	-	11591705	-	-	BIOGRID	NFKB3|p65	PP2Ac|PP2CA|PP2Calpha|RP-C	-	-	-	Low Throughput
280083	Akiyama M (2003)	111902	112874	308.112	Affinity Capture-Western	physical	interacts with	-	5970 (interacts with) 7015	RELA	TERT	9606	9606	-	12517770	-	-	BIOGRID	NFKB3|p65	CMM9|DKCA2|DKCB4|EST2|PFBMFT1|TCS1|TP2|TRT|hEST2|hTRT	-	-	-	Low Throughput
2263154	Huttlin EL (2017)	108837	116586	1738	Affinity Capture-MS	physical	interacts with	-	2563 (interacts with) 22926	GABRD	ATF6	9606	9606	-	28514442	Quantitative scores are a modified CompPASS score derived from Sowa et al., Cell, 2009 (PMID 19615732). The cut-off threshold is > 0.75.	0.860002	BIOGRID	EIG10|EJM7|GEFSP5	ATF6A	-	-	-	High Throughput
2558551	Liu X (2018)	107297	106700	135.543	Proximity Label-MS	physical	interacts with	-	847 (interacts with) 197	CAT	AHSG	9606	9606	-	29568061	-	-	BIOGRID	-	A2HS|AHS|FETUA|HSGA	-	PRO2743	-	High Throughput
2558553	Liu X (2018)	107297	110962	149.446	Proximity Label-MS	physical	interacts with	-	847 (interacts with) 4907	CAT	NT5E	9606	9606	-	29568061	-	-	BIOGRID	-	CALJA|CD73|E5NT|NT|NT5|NTE|eN|eNT	-	RP11-321N4.1	-	High Throughput
2553632	Liu X (2018)	107297	576066	193.069	Affinity Capture-MS	physical	interacts with	-	847 (interacts with) 653781	CAT	POTEJ	9606	9606	-	29568061	-	-	BIOGRID	-	POTE2beta	-	-	-	High Throughput
2270445	Huttlin EL (2017)	110149	108612	416.898	Affinity Capture-MS	physical	interacts with	-	3958 (interacts with) 2324	LGALS3	FLT4	9606	9606	-	28514442	Quantitative scores are a modified CompPASS score derived from Sowa et al., Cell, 2009 (PMID 19615732). The cut-off threshold is > 0.75.|Re-analysis of the data from the first paper, The BioPlex Network: A Systematic Exploration of the Human Interactome, PUBMED:26186194	0.779061	BIOGRID	CBP35|GAL3|GALBP|GALIG|L31|LGALS2|MAC2	FLT41|LMPH1A|PCL|VEGFR3	-	-	-	High Throughput
2261555	Huttlin EL (2017)	110149	108218	2244.15	Affinity Capture-MS	physical	interacts with	-	3958 (interacts with) 1889	LGALS3	ECE1	9606	9606	-	28514442	Quantitative scores are a modified CompPASS score derived from Sowa et al., Cell, 2009 (PMID 19615732). The cut-off threshold is > 0.75.	0.875761	BIOGRID	CBP35|GAL3|GALBP|GALIG|L31|LGALS2|MAC2	ECE	-	RP3-329E20.1	-	High Throughput
2552270	Liu X (2018)	107297	116107	509.188	Proximity Label-MS	physical	interacts with	-	847 (interacts with) 10901	CAT	DHRS4	9606	9606	-	29568061	-	-	BIOGRID	-	CR|NRDR|PHCR|PSCD|SCAD-SRL|SDR-SRL|SDR25C1|SDR25C2	-	UNQ851/PRO1800	-	High Throughput
2244483	Huttlin EL (2017)	110149	106625	576.697	Affinity Capture-MS	physical	interacts with	-	3958 (interacts with) 112	LGALS3	ADCY6	9606	9606	-	28514442	Quantitative scores are a modified CompPASS score derived from Sowa et al., Cell, 2009 (PMID 19615732). The cut-off threshold is > 0.75.|Re-analysis of the data from the first paper, The BioPlex Network: A Systematic Exploration of the Human Interactome, PUBMED:26186194	0.981676	BIOGRID	CBP35|GAL3|GALBP|GALIG|L31|LGALS2|MAC2	AC6	-	-	-	High Throughput
2563674	Kang SS (2017)	112506	110970	203.763	Co-localization	physical	interacts with	-	6622 (interacts with) 4915	SNCA	NTRK2	9606	9606	-	28923922	-	-	BIOGRID	NACP|PARK1|PARK4|PD1	GP145-TrkB|TRKB|trk-B	-	RP11-263K15.1	-	Low Throughput
1504978	Chen TC (2014)	112506	106848	925.18	Co-localization	physical	interacts with	-	6622 (interacts with) 351	SNCA	APP	9606	9606	-	25241761	in situ PLA	-	BIOGRID	NACP|PARK1|PARK4|PD1	AAA|ABETA|ABPP|AD1|APPI|CTFgamma|CVAP|PN-II|PN2	-	-	-	High Throughput
1504976	Chen TC (2014)	112506	107057	152.091	Co-localization	physical	interacts with	-	6622 (interacts with) 581	SNCA	BAX	9606	9606	-	25241761	in situ PLA	-	BIOGRID	NACP|PARK1|PARK4|PD1	BCL2L4	-	-	-	High Throughput
2552256	Liu X (2018)	107297	108814	165.671	Proximity Label-MS	physical	interacts with	-	847 (interacts with) 2539	CAT	G6PD	9606	9606	-	29568061	-	-	BIOGRID	-	G6PD1	-	-	-	High Throughput
2236500	Huttlin EL (2017)	110149	106623	1059.6	Affinity Capture-MS	physical	interacts with	-	3958 (interacts with) 109	LGALS3	ADCY3	9606	9606	-	28514442	Quantitative scores are a modified CompPASS score derived from Sowa et al., Cell, 2009 (PMID 19615732). The cut-off threshold is > 0.75.|Re-analysis of the data from the first paper, The BioPlex Network: A Systematic Exploration of the Human Interactome, PUBMED:26186194	0.996494	BIOGRID	CBP35|GAL3|GALBP|GALIG|L31|LGALS2|MAC2	AC3	-	-	-	High Throughput
1444638	Hein MY (2015)	107297	109040	258.531	Affinity Capture-MS	physical	interacts with	-	847 (interacts with) 2778	CAT	GNAS	9606	9606	-	26496610	interaction detected by quantitative BAC-GFP interactomics (QUBIC)	-	BIOGRID	-	AHO|C20orf45|GNAS1|GPSA|GSA|GSP|NESP|PHP1A|PHP1B|PHP1C|POH	-	RP4-543J19.4	-	High Throughput
1450183	Hein MY (2015)	107297	115403	142.45	Affinity Capture-MS	physical	interacts with	-	847 (interacts with) 10096	CAT	ACTR3	9606	9606	-	26496610	interaction detected by quantitative BAC-GFP interactomics (QUBIC)	-	BIOGRID	-	ARP3	-	-	-	High Throughput
2234335	Huttlin EL (2017)	110149	106628	375.532	Affinity Capture-MS	physical	interacts with	-	3958 (interacts with) 115	LGALS3	ADCY9	9606	9606	-	28514442	Quantitative scores are a modified CompPASS score derived from Sowa et al., Cell, 2009 (PMID 19615732). The cut-off threshold is > 0.75.|Re-analysis of the data from the first paper, The BioPlex Network: A Systematic Exploration of the Human Interactome, PUBMED:26186194	0.998074	BIOGRID	CBP35|GAL3|GALBP|GALIG|L31|LGALS2|MAC2	AC9	-	-	-	High Throughput
1267310	Wan C (2015)	107297	112860	127.215	Co-fractionation	physical	interacts with	-	847 (interacts with) 7001	CAT	PRDX2	9606	9606	-	26344197	Fractionation was combined with mass spectrometry from five diverse animal species to predict co-complex protein interactions conserved across metazoa using an integrative computational scoring procedure along with an SVM approach. The significant data set of 16655 PPI, was derived from a set of more than 1M interactions by examining a ROC curve of predicted interactions against reference annotat…	0.110421	BIOGRID	-	HEL-S-2a|NKEF-B|NKEFB|PRP|PRX2|PRXII|PTX1|TDPX1|TPX1|TSA	-	-	-	High Throughput
258618	Cao C (2003)	107297	106543	210.941	Affinity Capture-Western	physical	interacts with	-	847 (interacts with) 25	CAT	ABL1	9606	9606	-	12777400	-	-	BIOGRID	-	ABL|JTK7|bcr/abl|c-ABL|c-ABL1|p150|v-abl	-	RP11-83J21.1	-	Low Throughput
258619	Cao C (2003)	107297	106545	150.995	Affinity Capture-Western	physical	interacts with	-	847 (interacts with) 27	CAT	ABL2	9606	9606	-	12777400	-	-	BIOGRID	-	ABLL|ARG	-	RP11-177A2.3	-	Low Throughput
737721	Olah J (2011)	107297	106848	1025.32	Reconstituted Complex	physical	interacts with	-	847 (interacts with) 351	CAT	APP	9606	9606	-	21832049	-	-	BIOGRID	-	AAA|ABETA|ABPP|AD1|APPI|CTFgamma|CVAP|PN-II|PN2	-	-	-	High Throughput
2227430	Huttlin EL (2017)	110149	115551	215.172	Affinity Capture-MS	physical	interacts with	-	3958 (interacts with) 10257	LGALS3	ABCC4	9606	9606	-	28514442	Quantitative scores are a modified CompPASS score derived from Sowa et al., Cell, 2009 (PMID 19615732). The cut-off threshold is > 0.75.|Re-analysis of the data from the first paper, The BioPlex Network: A Systematic Exploration of the Human Interactome, PUBMED:26186194	0.999859	BIOGRID	CBP35|GAL3|GALBP|GALIG|L31|LGALS2|MAC2	MOAT-B|MOATB|MRP4	-	RP11-74A12.1	-	High Throughput
2227576	Huttlin EL (2017)	110149	119539	518.362	Affinity Capture-MS	physical	interacts with	-	3958 (interacts with) 51435	LGALS3	SCARA3	9606	9606	-	28514442	Quantitative scores are a modified CompPASS score derived from Sowa et al., Cell, 2009 (PMID 19615732). The cut-off threshold is > 0.75.|Re-analysis of the data from the first paper, The BioPlex Network: A Systematic Exploration of the Human Interactome, PUBMED:26186194	0.99985	BIOGRID	CBP35|GAL3|GALBP|GALIG|L31|LGALS2|MAC2	APC7|CSR|CSR1|MSLR1|MSRL1	-	-	-	High Throughput
2226674	Huttlin EL (2017)	110149	111262	355.556	Affinity Capture-MS	physical	interacts with	-	3958 (interacts with) 5243	LGALS3	ABCB1	9606	9606	-	28514442	Quantitative scores are a modified CompPASS score derived from Sowa et al., Cell, 2009 (PMID 19615732). The cut-off threshold is > 0.75.|Re-analysis of the data from the first paper, The BioPlex Network: A Systematic Exploration of the Human Interactome, PUBMED:26186194	0.999904	BIOGRID	CBP35|GAL3|GALBP|GALIG|L31|LGALS2|MAC2	ABC20|CD243|CLCS|GP170|MDR1|P-GP|PGY1	-	-	-	High Throughput
2223837	Huttlin EL (2017)	110149	108621	633.607	Affinity Capture-MS	physical	interacts with	-	3958 (interacts with) 2335	LGALS3	FN1	9606	9606	-	28514442	Quantitative scores are a modified CompPASS score derived from Sowa et al., Cell, 2009 (PMID 19615732). The cut-off threshold is > 0.75.|Re-analysis of the data from the first paper, The BioPlex Network: A Systematic Exploration of the Human Interactome, PUBMED:26186194	0.999982	BIOGRID	CBP35|GAL3|GALBP|GALIG|L31|LGALS2|MAC2	CIG|ED-B|FINC|FN|FNZ|GFND|GFND2|LETS|MSF	-	-	-	High Throughput
1446470	Hein MY (2015)	112506	111626	1252.74	Affinity Capture-MS	physical	interacts with	-	6622 (interacts with) 5644	SNCA	PRSS1	9606	9606	-	26496610	interaction detected by quantitative BAC-GFP interactomics (QUBIC)	-	BIOGRID	NACP|PARK1|PARK4|PD1	TRP1|TRY1|TRY4|TRYP1	-	-	-	High Throughput
1265103	Wan C (2015)	110149	110727	233.647	Co-fractionation	physical	interacts with	-	3958 (interacts with) 4643	LGALS3	MYO1E	9606	9606	-	26344197	Fractionation was combined with mass spectrometry from five diverse animal species to predict co-complex protein interactions conserved across metazoa using an integrative computational scoring procedure along with an SVM approach. The significant data set of 16655 PPI, was derived from a set of more than 1M interactions by examining a ROC curve of predicted interactions against reference annotat…	0.109821	BIOGRID	CBP35|GAL3|GALBP|GALIG|L31|LGALS2|MAC2	FSGS6|HuncM-IC|MYO1C	-	-	-	High Throughput
1272511	Wan C (2015)	126492	112587	1738	Co-fractionation	physical	interacts with	-	137902 (interacts with) 6709	PXDNL	SPTAN1	9606	9606	-	26344197	Fractionation was combined with mass spectrometry from five diverse animal species to predict co-complex protein interactions conserved across metazoa using an integrative computational scoring procedure along with an SVM approach. The significant data set of 16655 PPI, was derived from a set of more than 1M interactions by examining a ROC curve of predicted interactions against reference annotat…	0.144433	BIOGRID	PMR1|PRM1|VPO2	EIEE5|NEAS|SPTA2	-	-	-	High Throughput
735642	Chung JY (2011)	112506	106710	279.845	Far Western	physical	interacts with	-	6622 (interacts with) 207	SNCA	AKT1	9606	9606	-	21474915	figure S3	-	BIOGRID	NACP|PARK1|PARK4|PD1	AKT|CWS6|PKB|PKB-ALPHA|PRKBA|RAC|RAC-ALPHA	-	-	-	Low Throughput
1254113	Carvalho RS (2014)	110149	106652	385.191	Affinity Capture-MS	physical	interacts with	-	3958 (interacts with) 142	LGALS3	PARP1	9606	9606	-	24755837	-	-	BIOGRID	CBP35|GAL3|GALBP|GALIG|L31|LGALS2|MAC2	ADPRT|ADPRT 1|ADPRT1|ARTD1|PARP|PARP-1|PPOL|pADPRT-1	-	RP11-125A15.2	-	Low Throughput
734998	Woods WS (2007)	112506	108578	119.413	Protein-peptide	physical	interacts with	-	6622 (interacts with) 2288	SNCA	FKBP4	9606	9606	-	17893145	table 1. T7 bacteriophage displaying cDNA from human brain (Novagen T7 Select).	-	BIOGRID	NACP|PARK1|PARK4|PD1	FKBP51|FKBP52|FKBP59|HBI|Hsp56|PPIase|p52	-	-	-	High Throughput
1254107	Carvalho RS (2014)	110149	106574	188.47	Affinity Capture-MS	physical	interacts with	-	3958 (interacts with) 59	LGALS3	ACTA2	9606	9606	-	24755837	-	-	BIOGRID	CBP35|GAL3|GALBP|GALIG|L31|LGALS2|MAC2	AAT6|ACTSA|MYMY5	-	GIG46	-	Low Throughput
1254103	Carvalho RS (2014)	110149	106997	131.871	Affinity Capture-MS	physical	interacts with	-	3958 (interacts with) 509	LGALS3	ATP5C1	9606	9606	-	24755837	-	-	BIOGRID	CBP35|GAL3|GALBP|GALIG|L31|LGALS2|MAC2	ATP5C|ATP5CL1	-	RP11-401E9.1	-	Low Throughput
727056	Bruinsma IB (2011)	112506	109547	280.225	Reconstituted Complex	physical	interacts with	-	6622 (interacts with) 3315	SNCA	HSPB1	9606	9606	-	21905118	table 1.	-	BIOGRID	NACP|PARK1|PARK4|PD1	CMT2F|HEL-S-102|HMN2B|HS.76067|HSP27|HSP28|Hsp25|SRP27	-	-	-	Low Throughput
734773	Sousa VL (2009)	112506	106573	148.348	Reconstituted Complex	physical	interacts with	-	6622 (interacts with) 58	SNCA	ACTA1	9606	9606	-	19553474	figure 1D.	-	BIOGRID	NACP|PARK1|PARK4|PD1	ACTA|ASMA|CFTD|CFTD1|CFTDM|MPFD|NEM1|NEM2|NEM3	-	RP5-1068B5.2	-	Low Throughput
1254085	Carvalho RS (2014)	110149	109894	180.239	Affinity Capture-MS	physical	interacts with	-	3958 (interacts with) 3688	LGALS3	ITGB1	9606	9606	-	24755837	-	-	BIOGRID	CBP35|GAL3|GALBP|GALIG|L31|LGALS2|MAC2	CD29|FNRB|GPIIA|MDF2|MSK12|VLA-BETA|VLAB	-	RP11-479G22.2	-	Low Throughput
1254089	Carvalho RS (2014)	110149	106696	206.544	Affinity Capture-MS	physical	interacts with	-	3958 (interacts with) 191	LGALS3	AHCY	9606	9606	-	24755837	-	-	BIOGRID	CBP35|GAL3|GALBP|GALIG|L31|LGALS2|MAC2	SAHH|adoHcyase	-	-	-	Low Throughput
601827	Vinayagam A (2011)	112506	107454	177.959	Two-hybrid	physical	interacts with	-	6622 (interacts with) 1019	SNCA	CDK4	9606	9606	-	21900206	-	-	BIOGRID	NACP|PARK1|PARK4|PD1	CMM3|PSK-J3	-	-	-	High Throughput
601824	Vinayagam A (2011)	112506	106830	354.435	Two-hybrid	physical	interacts with	-	6622 (interacts with) 333	SNCA	APLP1	9606	9606	-	21900206	-	-	BIOGRID	NACP|PARK1|PARK4|PD1	APLP	-	-	-	High Throughput
2240495	Huttlin EL (2017)	116982	112290	114.177	Affinity Capture-MS	physical	interacts with	-	23410 (interacts with) 6389	SIRT3	SDHA	9606	9606	-	28514442	Quantitative scores are a modified CompPASS score derived from Sowa et al., Cell, 2009 (PMID 19615732). The cut-off threshold is > 0.75.	0.991377	BIOGRID	SIR2L3	CMD1GG|FP|PGL5|SDH1|SDH2|SDHF	-	-	-	High Throughput
860784	Merlin J (2011)	110149	108276	1144.08	Affinity Capture-Western	physical	interacts with	-	3958 (interacts with) 1956	LGALS3	EGFR	9606	9606	-	21258405	-	-	BIOGRID	CBP35|GAL3|GALBP|GALIG|L31|LGALS2|MAC2	ERBB|ERBB1|HER1|NISBD2|PIG61|mENA	-	-	-	Low Throughput
737436	Voss PG (2008)	110149	106573	250.923	Affinity Capture-MS	physical	interacts with	-	3958 (interacts with) 58	LGALS3	ACTA1	9606	9606	-	18662664	figure 1.	-	BIOGRID	CBP35|GAL3|GALBP|GALIG|L31|LGALS2|MAC2	ACTA|ASMA|CFTD|CFTD1|CFTDM|MPFD|NEM1|NEM2|NEM3	-	RP5-1068B5.2	-	Low Throughput
739549	Olah J (2011)	110149	106848	1963.28	Reconstituted Complex	physical	interacts with	-	3958 (interacts with) 351	LGALS3	APP	9606	9606	-	21832049	-	-	BIOGRID	CBP35|GAL3|GALBP|GALIG|L31|LGALS2|MAC2	AAA|ABETA|ABPP|AD1|APPI|CTFgamma|CVAP|PN-II|PN2	-	-	-	High Throughput
589425	Law IK (2009)	116982	109545	273.539	Affinity Capture-MS	physical	interacts with	-	23410 (interacts with) 3313	SIRT3	HSPA9	9606	9606	-	19343720	-	-	BIOGRID	SIR2L3	CRP40|CSA|GRP-75|GRP75|HEL-S-124m|HSPA9B|MOT|MOT2|MTHSP75|PBP74	-	-	-	Low Throughput
1054105	Krogsdam AM (2002)	114973	111464	97.5098	Reconstituted Complex	physical	interacts with	-	9611 (interacts with) 5468	NCOR1	PPARG	9606	9606	-	11903058	-	-	BIOGRID	N-CoR|N-CoR1|PPP1R109|TRAC1|hN-CoR	CIMT1|GLM1|NR1C3|PPARG1|PPARG2|PPARgamma	-	-	-	Low Throughput
1417086	DiRenzo J (1997)	114973	111849	88.413	Reconstituted Complex	physical	interacts with	-	9611 (interacts with) 5914	NCOR1	RARA	9606	9606	-	9121466	-	-	BIOGRID	N-CoR|N-CoR1|PPP1R109|TRAC1|hN-CoR	NR1B1|RAR	-	-	-	Low Throughput
1054104	Krogsdam AM (2002)	114973	111461	155.66	Reconstituted Complex	physical	interacts with	-	9611 (interacts with) 5465	NCOR1	PPARA	9606	9606	-	11903058	-	-	BIOGRID	N-CoR|N-CoR1|PPP1R109|TRAC1|hN-CoR	NR1C1|PPAR|PPARalpha|hPPAR	-	SC22CB-5E3.5	-	Low Throughput
471099	Jacobs KM (2008)	116982	108598	148.899	Affinity Capture-Western	physical	interacts with	-	23410 (interacts with) 2309	SIRT3	FOXO3	9606	9606	-	18781224	-	-	BIOGRID	SIR2L3	AF6q21|FKHRL1|FKHRL1P2|FOXO2|FOXO3A	-	-	-	Low Throughput
589418	Law IK (2009)	116982	109153	125.984	Affinity Capture-MS	physical	interacts with	-	23410 (interacts with) 2896	SIRT3	GRN	9606	9606	-	19343720	-	-	BIOGRID	SIR2L3	CLN11|GEP|GP88|PCDGF|PEPI|PGRN	-	-	-	Low Throughput
589415	Law IK (2009)	116982	106994	142.404	Affinity Capture-MS	physical	interacts with	-	23410 (interacts with) 506	SIRT3	ATP5B	9606	9606	-	19343720	-	-	BIOGRID	SIR2L3	ATPMB|ATPSB|HEL-S-271	-	-	-	Low Throughput
589414	Law IK (2009)	116982	106987	231.67	Affinity Capture-MS	physical	interacts with	-	23410 (interacts with) 498	SIRT3	ATP5A1	9606	9606	-	19343720	-	-	BIOGRID	SIR2L3	ATP5A|ATP5AL2|ATPM|COXPD22|HEL-S-123m|MC5DN4|MOM2|OMR|ORM|hATP1	-	-	-	Low Throughput
928117	Catic A (2013)	114973	107775	94.3351	Affinity Capture-Western	physical	interacts with	-	9611 (interacts with) 1385	NCOR1	CREB1	9606	9606	-	24315104	-	-	BIOGRID	N-CoR|N-CoR1|PPP1R109|TRAC1|hN-CoR	CREB	-	-	-	Low Throughput
518214	Nomura T (2004)	114973	115457	181.354	Affinity Capture-Western	physical	interacts with	-	9611 (interacts with) 10155	NCOR1	TRIM28	9606	9606	-	14761981	-	-	BIOGRID	N-CoR|N-CoR1|PPP1R109|TRAC1|hN-CoR	KAP1|PPP1R157|RNF96|TF1B|TIF1B	-	-	-	Low Throughput
658714	Yoon HG (2005)	114973	114368	51.2282	Co-fractionation	physical	interacts with	-	9611 (interacts with) 8841	NCOR1	HDAC3	9606	9606	-	15601853	figure 2D.	-	BIOGRID	N-CoR|N-CoR1|PPP1R109|TRAC1|hN-CoR	HD3|RPD3|RPD3-2	-	-	-	Low Throughput
658752	Hodgson MC (2005)	114973	106862	105.001	Affinity Capture-Western	physical	interacts with	-	9611 (interacts with) 367	NCOR1	AR	9606	9606	-	15598662	figure 7C.	-	BIOGRID	N-CoR|N-CoR1|PPP1R109|TRAC1|hN-CoR	AIS|DHTR|HUMARA|HYSP1|KD|NR3C4|SBMA|SMAX1|TFM	-	RP11-383C12.1	-	Low Throughput
569036	Thorne JL (2011)	114973	107460	160.518	Affinity Capture-RNA	physical	interacts with	-	9611 (interacts with) 1026	NCOR1	CDKN1A	9606	9606	-	21088000	-	-	BIOGRID	N-CoR|N-CoR1|PPP1R109|TRAC1|hN-CoR	CAP20|CDKN1|CIP1|MDA-6|P21|SDI1|WAF1|p21CIP1	-	-	-	Low Throughput
658257	Barrett A (2007)	114973	115984	206.921	Affinity Capture-Western	physical	interacts with	-	9611 (interacts with) 10765	NCOR1	KDM5B	9606	9606	-	17373667	figure 2A.	-	BIOGRID	N-CoR|N-CoR1|PPP1R109|TRAC1|hN-CoR	CT31|JARID1B|PLU-1|PLU1|PPP1R98|PUT1|RBBP2H1A	-	-	-	Low Throughput
511896	Minucci S (2000)	114973	111384	115.667	Reconstituted Complex	physical	interacts with	-	9611 (interacts with) 5371	NCOR1	PML	9606	9606	-	10882117	-	-	BIOGRID	N-CoR|N-CoR1|PPP1R109|TRAC1|hN-CoR	MYL|PP8675|RNF71|TRIM19	-	-	-	Low Throughput
516065	Wang Q (2004)	114973	109165	97.8412	Reconstituted Complex	physical	interacts with	-	9611 (interacts with) 2908	NCOR1	NR3C1	9606	9606	-	15016838	-	-	BIOGRID	N-CoR|N-CoR1|PPP1R109|TRAC1|hN-CoR	GCCR|GCR|GCRST|GR|GRL	-	-	-	Low Throughput
513761	Sun Y (2004)	114973	112168	113.155	Reconstituted Complex	physical	interacts with	-	9611 (interacts with) 6256	NCOR1	RXRA	9606	9606	-	15116119	-	-	BIOGRID	N-CoR|N-CoR1|PPP1R109|TRAC1|hN-CoR	NR2B1	-	-	-	Low Throughput
503425	Ki SH (2005)	114973	107480	71.7369	Affinity Capture-Western	physical	interacts with	-	9611 (interacts with) 1051	NCOR1	CEBPB	9606	9606	-	15870285	-	-	BIOGRID	N-CoR|N-CoR1|PPP1R109|TRAC1|hN-CoR	C/EBP-beta|IL6DBP|NF-IL6|TCF5	-	PP9092	-	Low Throughput
483768	Li X (2002)	114973	113841	67.0414	Affinity Capture-Western	physical	interacts with	-	9611 (interacts with) 8202	NCOR1	NCOA3	9606	9606	-	12089344	-	-	BIOGRID	N-CoR|N-CoR1|PPP1R109|TRAC1|hN-CoR	ACTR|AIB-1|AIB1|CAGH16|CTG26|KAT13B|RAC3|SRC-3|SRC3|TNRC14|TNRC16|TRAM-1|bHLHe42|pCIP	-	RP5-1049G16.3	-	Low Throughput
503426	Ki SH (2005)	114973	110852	112.259	Affinity Capture-Western	physical	interacts with	-	9611 (interacts with) 4780	NCOR1	NFE2L2	9606	9606	-	15870285	-	-	BIOGRID	N-CoR|N-CoR1|PPP1R109|TRAC1|hN-CoR	NRF2	-	-	-	Low Throughput
468143	Li CW (2009)	114973	115296	121.315	Affinity Capture-Western	physical	interacts with	-	9611 (interacts with) 9971	NCOR1	NR1H4	9606	9606	-	18978041	-	-	BIOGRID	N-CoR|N-CoR1|PPP1R109|TRAC1|hN-CoR	BAR|FXR|HRR-1|HRR1|RIP14	-	-	-	Low Throughput
464552	Bandyopadhyay S (2010)	114838	111567	160.222	Two-hybrid	physical	interacts with	-	9448 (interacts with) 5581	MAP4K4	PRKCE	9606	9606	-	20936779	-	-	BIOGRID	FLH21957|HEL-S-31|HGK|MEKKK4|NIK	PKCE|nPKC-epsilon	-	-	-	High Throughput
1183419	Huttlin EL (2015)	108451	111810	1738	Affinity Capture-MS	physical	interacts with	-	2152 (interacts with) 5872	F3	RAB13	9606	9606	-	26186194	Quantitative scores are a modified CompPASS score derived from Sowa et al., Cell, 2009 (PMID 19615732). The cut-off threshold is > 0.75.	0.877454	BIOGRID	CD142|TF|TFA	-	-	GIG4	-	High Throughput
458026	De Amicis F (2009)	114973	111260	88.5662	Affinity Capture-Western	physical	interacts with	-	9611 (interacts with) 5241	NCOR1	PGR	9606	9606	-	19147702	-	-	BIOGRID	N-CoR|N-CoR1|PPP1R109|TRAC1|hN-CoR	NR3C3|PR	-	-	-	Low Throughput
314645	Huang HJ (2002)	114973	108403	223.489	Reconstituted Complex	physical	interacts with	-	9611 (interacts with) 2099	NCOR1	ESR1	9606	9606	-	12145334	-	-	BIOGRID	N-CoR|N-CoR1|PPP1R109|TRAC1|hN-CoR	ER|ESR|ESRA|ESTRR|Era|NR3A1	-	RP1-130E4.1	-	Low Throughput
260778	Baek SH (2002)	114973	110857	63.5083	Affinity Capture-Western	physical	interacts with	-	9611 (interacts with) 4790	NCOR1	NFKB1	9606	9606	-	12150997	-	-	BIOGRID	N-CoR|N-CoR1|PPP1R109|TRAC1|hN-CoR	EBP-1|KBF1|NF-kB1|NF-kappa-B|NF-kappaB|NFKB-p105|NFKB-p50|NFkappaB|p105|p50	-	-	-	Low Throughput
2455838	Ivanov AA (2017)	108288	107464	30.0825	FRET	physical	interacts with	-	1969 (interacts with) 1030	EPHA2	CDKN2B	9606	9606	-	28628118	Time-resolved fluorescence energy transfer (TR-FRET)	-	BIOGRID	ARCC2|CTPA|CTPP1|CTRCT6|ECK	CDK4I|INK4B|MTS2|P15|TP15|p15INK4b	-	RP11-149I2.1	-	High Throughput
2459723	Ivanov AA (2017)	112666	112670	157.819	FRET	physical	interacts with	-	6790 (interacts with) 6794	AURKA	STK11	9606	9606	-	28628118	Time-resolved fluorescence energy transfer (TR-FRET)	-	BIOGRID	AIK|ARK1|AURA|AURORA2|BTAK|PPP1R47|STK15|STK6|STK7	LKB1|PJS|hLKB1	RP5-1167H4.6	-	-	High Throughput
2455837	Ivanov AA (2017)	108288	106710	120.015	FRET	physical	interacts with	-	1969 (interacts with) 207	EPHA2	AKT1	9606	9606	-	28628118	Time-resolved fluorescence energy transfer (TR-FRET)	-	BIOGRID	ARCC2|CTPA|CTPP1|CTRCT6|ECK	AKT|CWS6|PKB|PKB-ALPHA|PRKBA|RAC|RAC-ALPHA	-	-	-	High Throughput
2459722	Ivanov AA (2017)	112666	110381	184.928	FRET	physical	interacts with	-	6790 (interacts with) 4217	AURKA	MAP3K5	9606	9606	-	28628118	Time-resolved fluorescence energy transfer (TR-FRET)	-	BIOGRID	AIK|ARK1|AURA|AURORA2|BTAK|PPP1R47|STK15|STK6|STK7	ASK1|MAPKKK5|MEKK5	RP5-1167H4.6	RP3-325F22.4	-	High Throughput
950827	Cai Y (2014)	108126	109315	335.447	Affinity Capture-Western	physical	interacts with	-	1789 (interacts with) 3065	DNMT3B	HDAC1	9606	9606	-	23708667	nuclear fractions were used	-	BIOGRID	ICF|ICF1|M.HsaIIIB	GON-10|HD1|RPD3|RPD3L1	RP5-1085F17.2	RP4-811H24.2	-	Low Throughput
2542512	Yu Z (2017)	112666	114646	122.727	Affinity Capture-Western	physical	interacts with	-	6790 (interacts with) 9212	AURKA	AURKB	9606	9606	-	28595628	-	-	BIOGRID	AIK|ARK1|AURA|AURORA2|BTAK|PPP1R47|STK15|STK6|STK7	AIK2|AIM-1|AIM1|ARK2|AurB|IPL1|PPP1R48|STK12|STK5|aurkb-sv1|aurkb-sv2	RP5-1167H4.6	-	-	Low Throughput
950828	Cai Y (2014)	108126	109316	208.546	Affinity Capture-Western	physical	interacts with	-	1789 (interacts with) 3066	DNMT3B	HDAC2	9606	9606	-	23708667	nuclear fractions were used	-	BIOGRID	ICF|ICF1|M.HsaIIIB	HD2|RPD3|YAF1	RP5-1085F17.2	-	-	Low Throughput
2536517	Katayama H (2011)	112666	108403	359.772	Affinity Capture-Western	physical	interacts with	-	6790 (interacts with) 2099	AURKA	ESR1	9606	9606	-	21761334	-	-	BIOGRID	AIK|ARK1|AURA|AURORA2|BTAK|PPP1R47|STK15|STK6|STK7	ER|ESR|ESRA|ESTRR|Era|NR3A1	RP5-1167H4.6	RP1-130E4.1	-	Low Throughput
2536516	Katayama H (2011)	112666	113010	705.079	Affinity Capture-Western	physical	interacts with	-	6790 (interacts with) 7157	AURKA	TP53	9606	9606	-	21761334	-	-	BIOGRID	AIK|ARK1|AURA|AURORA2|BTAK|PPP1R47|STK15|STK6|STK7	BCC7|LFS1|P53|TRP53	RP5-1167H4.6	-	-	Low Throughput
1175077	Wallach T (2013)	111520	112024	125.491	Two-hybrid	physical	interacts with	-	5528 (interacts with) 6097	PPP2R5D	RORC	9606	9606	-	23555304	-	-	BIOGRID	B56D	NR1F3|RORG|RZR-GAMMA|RZRG|TOR	-	RP11-98D18.11-001	-	Low Throughput
674171	Hervouet E (2009)	108126	107775	135.536	Affinity Capture-Western	physical	interacts with	-	1789 (interacts with) 1385	DNMT3B	CREB1	9606	9606	-	19786833	-	-	BIOGRID	ICF|ICF1|M.HsaIIIB	CREB	RP5-1085F17.2	-	-	Low Throughput
674172	Hervouet E (2009)	108126	108361	202.247	Affinity Capture-Western	physical	interacts with	-	1789 (interacts with) 2047	DNMT3B	EPHB1	9606	9606	-	19786833	-	-	BIOGRID	ICF|ICF1|M.HsaIIIB	ELK|EPHT2|Hek6|NET	RP5-1085F17.2	-	-	Low Throughput
832719	O'Hagan HM (2011)	108126	116983	217.27	Affinity Capture-Western	physical	interacts with	-	1789 (interacts with) 23411	DNMT3B	SIRT1	9606	9606	-	22094255	cell were treated with 2mM hydrogen peroxide to induce interaction	-	BIOGRID	ICF|ICF1|M.HsaIIIB	SIR2L1	RP5-1085F17.2	RP11-57G10.3	-	Low Throughput
1527743	Laurenzana EM (2012)	115295	112592	675.065	Two-hybrid	physical	interacts with	-	9970 (interacts with) 6714	NR1I3	SRC	9606	9606	-	22896671	-	-	BIOGRID	CAR|CAR1|MB67	ASV|SRC1|c-SRC|p60-Src	-	RP5-823N20.1	-	Low Throughput
923862	Kristensen AR (2012)	111520	112860	240.615	Co-fractionation	physical	interacts with	-	5528 (interacts with) 7001	PPP2R5D	PRDX2	9606	9606	-	22863883	-	-	BIOGRID	B56D	HEL-S-2a|NKEF-B|NKEFB|PRP|PRX2|PRXII|PTX1|TDPX1|TPX1|TSA	-	-	-	High Throughput
1514815	Gao J (2015)	115295	111384	468.446	Affinity Capture-Western	physical	interacts with	-	9970 (interacts with) 5371	NR1I3	PML	9606	9606	-	26407237	-	-	BIOGRID	CAR|CAR1|MB67	MYL|PP8675|RNF71|TRIM19	-	-	-	Low Throughput
1527745	Laurenzana EM (2012)	115295	106695	49.6085	Affinity Capture-Western	physical	interacts with	-	9970 (interacts with) 190	NR1I3	NR0B1	9606	9606	-	22896671	-	-	BIOGRID	CAR|CAR1|MB67	AHC|AHCH|AHX|DAX-1|DAX1|DSS|GTD|HHG|NROB1|SRXY2	-	-	-	Low Throughput
2375951	Wang J (2012)	112666	107070	224.172	Biochemical Activity	physical	interacts with	Phosphorylation	6790 (interacts with) 598	AURKA	BCL2L1	9606	9606	-	22617334	-	-	BIOGRID	AIK|ARK1|AURA|AURORA2|BTAK|PPP1R47|STK15|STK6|STK7	BCL-XL/S|BCL2L|BCLX|BCLXL|BCLXS|Bcl-X|PPP1R52|bcl-xL|bcl-xS	RP5-1167H4.6	RP5-857M17.3	-	Low Throughput
1447769	Hein MY (2015)	108288	112904	185.679	Affinity Capture-MS	physical	interacts with	-	1969 (interacts with) 7046	EPHA2	TGFBR1	9606	9606	-	26496610	interaction detected by quantitative BAC-GFP interactomics (QUBIC)	-	BIOGRID	ARCC2|CTPA|CTPP1|CTRCT6|ECK	AAT5|ACVRLK4|ALK-5|ALK5|ESS1|LDS1|LDS1A|LDS2A|MSSE|SKR4|TGFR-1|tbetaR-I	-	RP11-96L7.1	-	High Throughput
1504959	Chen TC (2014)	112111	111196	147.851	Co-localization	physical	interacts with	-	6197 (interacts with) 5170	RPS6KA3	PDPK1	9606	9606	-	25241761	in situ PLA	-	BIOGRID	CLS|HU-3|ISPK-1|MAPKAPK1B|MRX19|RSK|RSK2|S6K-alpha3|p90-RSK2|pp90RSK2	PDK1|PDPK2|PDPK2P|PRO0461	RP11-393H10.3	-	-	High Throughput
1514814	Gao J (2015)	115295	116097	129.559	Affinity Capture-Western	physical	interacts with	-	9970 (interacts with) 10891	NR1I3	PPARGC1A	9606	9606	-	26407237	-	-	BIOGRID	CAR|CAR1|MB67	LEM6|PGC-1(alpha)|PGC-1v|PGC1|PGC1A|PPARGC1	-	-	-	Low Throughput
2455067	Kang S (2008)	112111	111580	156.551	Reconstituted Complex	physical	interacts with	-	6197 (interacts with) 5594	RPS6KA3	MAPK1	9606	9606	-	18156174	-	-	BIOGRID	CLS|HU-3|ISPK-1|MAPKAPK1B|MRX19|RSK|RSK2|S6K-alpha3|p90-RSK2|pp90RSK2	ERK|ERK-2|ERK2|ERT1|MAPK2|P42MAPK|PRKM1|PRKM2|p38|p40|p41|p41mapk|p42-MAPK	RP11-393H10.3	-	-	Low Throughput
2569186	Cho YY (2005)	112111	113010	499.586	Biochemical Activity	physical	interacts with	Phosphorylation	6197 (interacts with) 7157	RPS6KA3	TP53	9606	9606	-	15867353	-	-	BIOGRID	CLS|HU-3|ISPK-1|MAPKAPK1B|MRX19|RSK|RSK2|S6K-alpha3|p90-RSK2|pp90RSK2	BCC7|LFS1|P53|TRP53	RP11-393H10.3	-	-	Low Throughput
920951	Kristensen AR (2012)	112111	108040	150.961	Co-fractionation	physical	interacts with	-	6197 (interacts with) 1676	RPS6KA3	DFFA	9606	9606	-	22863883	-	-	BIOGRID	CLS|HU-3|ISPK-1|MAPKAPK1B|MRX19|RSK|RSK2|S6K-alpha3|p90-RSK2|pp90RSK2	DFF-45|DFF1|ICAD	RP11-393H10.3	H13	-	High Throughput
2455765	Ivanov AA (2017)	112666	108288	109.733	FRET	physical	interacts with	-	6790 (interacts with) 1969	AURKA	EPHA2	9606	9606	-	28628118	Time-resolved fluorescence energy transfer (TR-FRET)	-	BIOGRID	AIK|ARK1|AURA|AURORA2|BTAK|PPP1R47|STK15|STK6|STK7	ARCC2|CTPA|CTPP1|CTRCT6|ECK	RP5-1167H4.6	-	-	High Throughput
1056002	Molnar F (2005)	115295	113841	256.28	Reconstituted Complex	physical	interacts with	-	9970 (interacts with) 8202	NR1I3	NCOA3	9606	9606	-	15888456	EMSA	-	BIOGRID	CAR|CAR1|MB67	ACTR|AIB-1|AIB1|CAGH16|CTG26|KAT13B|RAC3|SRC-3|SRC3|TNRC14|TNRC16|TRAM-1|bHLHe42|pCIP	-	RP5-1049G16.3	-	Low Throughput
2455764	Ivanov AA (2017)	112666	107338	114.89	FRET	physical	interacts with	-	6790 (interacts with) 898	AURKA	CCNE1	9606	9606	-	28628118	Time-resolved fluorescence energy transfer (TR-FRET)	-	BIOGRID	AIK|ARK1|AURA|AURORA2|BTAK|PPP1R47|STK15|STK6|STK7	CCNE	RP5-1167H4.6	-	-	High Throughput
1055995	Molnar F (2005)	115295	112168	139.196	Reconstituted Complex	physical	interacts with	-	9970 (interacts with) 6256	NR1I3	RXRA	9606	9606	-	15888456	EMSA	-	BIOGRID	CAR|CAR1|MB67	NR2B1	-	-	-	Low Throughput
2455763	Ivanov AA (2017)	112666	106710	285.531	FRET	physical	interacts with	-	6790 (interacts with) 207	AURKA	AKT1	9606	9606	-	28628118	Time-resolved fluorescence energy transfer (TR-FRET)	-	BIOGRID	AIK|ARK1|AURA|AURORA2|BTAK|PPP1R47|STK15|STK6|STK7	AKT|CWS6|PKB|PKB-ALPHA|PRKBA|RAC|RAC-ALPHA	RP5-1167H4.6	-	-	High Throughput
2248021	Huttlin EL (2017)	112666	110857	116.501	Affinity Capture-MS	physical	interacts with	-	6790 (interacts with) 4790	AURKA	NFKB1	9606	9606	-	28514442	Quantitative scores are a modified CompPASS score derived from Sowa et al., Cell, 2009 (PMID 19615732). The cut-off threshold is > 0.75.|Re-analysis of the data from the first paper, The BioPlex Network: A Systematic Exploration of the Human Interactome, PUBMED:26186194	0.968601	BIOGRID	AIK|ARK1|AURA|AURORA2|BTAK|PPP1R47|STK15|STK6|STK7	EBP-1|KBF1|NF-kB1|NF-kappa-B|NF-kappaB|NFKB-p105|NFKB-p50|NFkappaB|p105|p50	RP5-1167H4.6	-	-	High Throughput
915068	Nadratowska-Wesolowska B (2013)	112111	108551	112.475	Biochemical Activity	physical	interacts with	Phosphorylation	6197 (interacts with) 2260	RPS6KA3	FGFR1	9606	9606	-	24141780	-	-	BIOGRID	CLS|HU-3|ISPK-1|MAPKAPK1B|MRX19|RSK|RSK2|S6K-alpha3|p90-RSK2|pp90RSK2	BFGFR|CD331|CEK|FGFBR|FGFR-1|FLG|FLT-2|FLT2|HBGFR|HH2|HRTFDS|KAL2|N-SAM|OGD|bFGF-R-1	RP11-393H10.3	-	-	Low Throughput
604650	Clark DE (2001)	112111	108403	253.108	Affinity Capture-Western	physical	interacts with	-	6197 (interacts with) 2099	RPS6KA3	ESR1	9606	9606	-	11432835	-	-	BIOGRID	CLS|HU-3|ISPK-1|MAPKAPK1B|MRX19|RSK|RSK2|S6K-alpha3|p90-RSK2|pp90RSK2	ER|ESR|ESRA|ESTRR|Era|NR3A1	RP11-393H10.3	RP1-130E4.1	-	Low Throughput
696352	Peng C (2012)	112111	110859	78.9459	Biochemical Activity	physical	interacts with	Phosphorylation	6197 (interacts with) 4792	RPS6KA3	NFKBIA	9606	9606	-	22685297	-	-	BIOGRID	CLS|HU-3|ISPK-1|MAPKAPK1B|MRX19|RSK|RSK2|S6K-alpha3|p90-RSK2|pp90RSK2	IKBA|MAD-3|NFKBI	RP11-393H10.3	-	-	Low Throughput
833256	Wadelin FR (2013)	117078	113895	317.043	Affinity Capture-MS	physical	interacts with	-	23532 (interacts with) 8290	PRAME	HIST3H3	9606	9606	-	23460923	-	-	BIOGRID	CT130|MAPE|OIP-4|OIP4	H3.4|H3/g|H3FT|H3t	-	-	-	Low Throughput
601557	Vinayagam A (2011)	112111	112495	382.043	Two-hybrid	physical	interacts with	-	6197 (interacts with) 6611	RPS6KA3	SMS	9606	9606	-	21900206	-	-	BIOGRID	CLS|HU-3|ISPK-1|MAPKAPK1B|MRX19|RSK|RSK2|S6K-alpha3|p90-RSK2|pp90RSK2	MRSR|SPMSY|SRS|SpS	RP11-393H10.3	-	-	High Throughput
275485	Zhao Y (1996)	112111	111581	131.571	Affinity Capture-Western	physical	interacts with	-	6197 (interacts with) 5595	RPS6KA3	MAPK3	9606	9606	-	8939914	-	-	BIOGRID	CLS|HU-3|ISPK-1|MAPKAPK1B|MRX19|RSK|RSK2|S6K-alpha3|p90-RSK2|pp90RSK2	ERK-1|ERK1|ERT2|HS44KDAP|HUMKER1A|P44ERK1|P44MAPK|PRKM3|p44-ERK1|p44-MAPK	RP11-393H10.3	-	-	Low Throughput
544607	Zhu F (2011)	112111	109268	148.993	Biochemical Activity	physical	interacts with	Phosphorylation	6197 (interacts with) 3014	RPS6KA3	H2AFX	9606	9606	-	21224359	-	-	BIOGRID	CLS|HU-3|ISPK-1|MAPKAPK1B|MRX19|RSK|RSK2|S6K-alpha3|p90-RSK2|pp90RSK2	H2A.X|H2A/X|H2AX	RP11-393H10.3	-	-	Low Throughput
739548	Olah J (2011)	108288	106848	601.261	Reconstituted Complex	physical	interacts with	-	1969 (interacts with) 351	EPHA2	APP	9606	9606	-	21832049	-	-	BIOGRID	ARCC2|CTPA|CTPP1|CTRCT6|ECK	AAA|ABETA|ABPP|AD1|APPI|CTFgamma|CVAP|PN-II|PN2	-	-	-	High Throughput
833254	Wadelin FR (2013)	117078	125732	83.1171	Affinity Capture-MS	physical	interacts with	-	23532 (interacts with) 121504	PRAME	HIST4H4	9606	9606	-	23460923	-	-	BIOGRID	CT130|MAPE|OIP-4|OIP4	H4/p	-	-	-	Low Throughput
723715	Epping MT (2005)	117078	111849	518.411	Two-hybrid	physical	interacts with	-	23532 (interacts with) 5914	PRAME	RARA	9606	9606	-	16179254	-	-	BIOGRID	CT130|MAPE|OIP-4|OIP4	NR1B1|RAR	-	-	-	Low Throughput
695593	Costessi A (2012)	117078	116667	841.57	Affinity Capture-MS	physical	interacts with	-	23532 (interacts with) 23028	PRAME	KDM1A	9606	9606	-	22912744	-	-	BIOGRID	CT130|MAPE|OIP-4|OIP4	AOF2|BHC110|KDM1|LSD1	-	RP1-184J9.1	-	Low Throughput
2205729	Kamran M (2017)	112666	112599	279.228	Reconstituted Complex	physical	interacts with	-	6790 (interacts with) 6721	AURKA	SREBF2	9606	9606	-	28218735	-	-	BIOGRID	AIK|ARK1|AURA|AURORA2|BTAK|PPP1R47|STK15|STK6|STK7	SREBP-2|SREBP2|bHLHd2	RP5-1167H4.6	CTA-250D10.14-005	-	Low Throughput
2205725	Kamran M (2017)	112666	111910	145.012	Reconstituted Complex	physical	interacts with	-	6790 (interacts with) 5978	AURKA	REST	9606	9606	-	28218735	-	-	BIOGRID	AIK|ARK1|AURA|AURORA2|BTAK|PPP1R47|STK15|STK6|STK7	NRSF|XBR	RP5-1167H4.6	-	-	Low Throughput
2205714	Kamran M (2017)	112666	107160	280.526	Reconstituted Complex	physical	interacts with	-	6790 (interacts with) 695	AURKA	BTK	9606	9606	-	28218735	-	-	BIOGRID	AIK|ARK1|AURA|AURORA2|BTAK|PPP1R47|STK15|STK6|STK7	AGMX1|AT|ATK|BPK|IMD1|PSCTK1|XLA	RP5-1167H4.6	RP1-164F3.2	-	Low Throughput
855138	Dzantiev L (2004)	110438	111142	146.307	Far Western	physical	interacts with	-	4292 (interacts with) 5111	MLH1	PCNA	9606	9606	-	15225546	-	-	BIOGRID	COCA2|FCC2|HNPCC|HNPCC2|hMLH1	ATLD2	-	-	-	Low Throughput
835513	Brieger A (2010)	110438	107572	64.6002	Two-hybrid	physical	interacts with	-	4292 (interacts with) 1152	MLH1	CKB	9606	9606	-	20706999	-	-	BIOGRID	COCA2|FCC2|HNPCC|HNPCC2|hMLH1	B-CK|BCK|CKBB|HEL-211|HEL-S-29	-	-	-	Low Throughput
737927	Olah J (2011)	114023	106848	716.399	Reconstituted Complex	physical	interacts with	-	8445 (interacts with) 351	DYRK2	APP	9606	9606	-	21832049	-	-	BIOGRID	-	AAA|ABETA|ABPP|AD1|APPI|CTFgamma|CVAP|PN-II|PN2	-	-	-	High Throughput
2205709	Kamran M (2017)	112666	110744	558.415	Reconstituted Complex	physical	interacts with	-	6790 (interacts with) 4661	AURKA	MYT1	9606	9606	-	28218735	-	-	BIOGRID	AIK|ARK1|AURA|AURORA2|BTAK|PPP1R47|STK15|STK6|STK7	C20orf36|MTF1|MYTI|NZF2|PLPB1|ZC2HC4A	RP5-1167H4.6	-	-	Low Throughput
835515	Brieger A (2010)	110438	109205	69.992	Two-hybrid	physical	interacts with	-	4292 (interacts with) 2950	MLH1	GSTP1	9606	9606	-	20706999	-	-	BIOGRID	COCA2|FCC2|HNPCC|HNPCC2|hMLH1	DFN7|FAEES3|GST3|GSTP|HEL-S-22|PI	-	-	-	Low Throughput
522026	Takeda M (2004)	110265	109315	792.932	Affinity Capture-Western	physical	interacts with	-	4090 (interacts with) 3065	SMAD5	HDAC1	9606	9606	-	14699069	-	-	BIOGRID	DWFC|JV5-1|MADH5	GON-10|HD1|RPD3|RPD3L1	-	RP4-811H24.2	-	Low Throughput
835507	Brieger A (2010)	110438	114255	172.255	Two-hybrid	physical	interacts with	-	4292 (interacts with) 8714	MLH1	ABCC3	9606	9606	-	20706999	-	-	BIOGRID	COCA2|FCC2|HNPCC|HNPCC2|hMLH1	ABC31|EST90757|MLP2|MOAT-D|MRP3|cMOAT2	-	-	-	Low Throughput
835497	Brieger A (2010)	110438	123822	91.1017	Two-hybrid	physical	interacts with	-	4292 (interacts with) 83939	MLH1	EIF2A	9606	9606	-	20706999	-	-	BIOGRID	COCA2|FCC2|HNPCC|HNPCC2|hMLH1	EIF-2A|MST089|MSTP004|MSTP089	-	CDA02	-	Low Throughput
1444066	Hein MY (2015)	112666	107880	338.918	Affinity Capture-MS	physical	interacts with	-	6790 (interacts with) 1499	AURKA	CTNNB1	9606	9606	-	26496610	interaction detected by quantitative BAC-GFP interactomics (QUBIC)	-	BIOGRID	AIK|ARK1|AURA|AURORA2|BTAK|PPP1R47|STK15|STK6|STK7	CTNNB|MRD19|armadillo	RP5-1167H4.6	OK/SW-cl.35	-	High Throughput
1417604	Arroyo R (2015)	112666	116366	1738	Two-hybrid	physical	interacts with	-	6790 (interacts with) 11197	AURKA	WIF1	9606	9606	-	25640309	-	-	BIOGRID	AIK|ARK1|AURA|AURORA2|BTAK|PPP1R47|STK15|STK6|STK7	WIF-1	RP5-1167H4.6	UNQ191/PRO217	-	High Throughput
573850	Maddika S (2009)	114023	110929	367.545	Affinity Capture-MS	physical	interacts with	-	8445 (interacts with) 4869	DYRK2	NPM1	9606	9606	-	19287380	-	-	BIOGRID	-	B23|NPM	-	-	-	High Throughput
835499	Brieger A (2010)	110438	108258	83.3621	Two-hybrid	physical	interacts with	-	4292 (interacts with) 1938	MLH1	EEF2	9606	9606	-	20706999	-	-	BIOGRID	COCA2|FCC2|HNPCC|HNPCC2|hMLH1	EEF-2|EF-2|EF2|SCA26	-	-	-	Low Throughput
573837	Maddika S (2009)	114023	109535	265.625	Affinity Capture-MS	physical	interacts with	-	8445 (interacts with) 3303	DYRK2	HSPA1A	9606	9606	-	19287380	-	-	BIOGRID	-	HEL-S-103|HSP70-1|HSP70-1A|HSP70I|HSP72|HSPA1	-	DAQB-147D11.1	-	High Throughput
1417602	Arroyo R (2015)	112666	124931	1150.28	Two-hybrid	physical	interacts with	-	6790 (interacts with) 92304	AURKA	SCGB3A1	9606	9606	-	25640309	-	-	BIOGRID	AIK|ARK1|AURA|AURORA2|BTAK|PPP1R47|STK15|STK6|STK7	HIN-1|HIN1|LU105|PnSP-2|UGRP2	RP5-1167H4.6	UNQ629/PRO1245	-	High Throughput
1417591	Arroyo R (2015)	112666	107447	597.226	Two-hybrid	physical	interacts with	-	6790 (interacts with) 1012	AURKA	CDH13	9606	9606	-	25640309	-	-	BIOGRID	AIK|ARK1|AURA|AURORA2|BTAK|PPP1R47|STK15|STK6|STK7	CDHH|P105	RP5-1167H4.6	-	-	High Throughput
835473	Brieger A (2010)	110438	114579	90.2777	Two-hybrid	physical	interacts with	-	4292 (interacts with) 9131	MLH1	AIFM1	9606	9606	-	20706999	-	-	BIOGRID	COCA2|FCC2|HNPCC|HNPCC2|hMLH1	AIF|CMT2D|CMTX4|COWCK|COXPD6|NADMR|NAMSD|PDCD8	-	RP3-438D16.2	-	Low Throughput
736368	Plotz G (2003)	110438	110573	54.7743	Affinity Capture-Western	physical	interacts with	-	4292 (interacts with) 4436	MLH1	MSH2	9606	9606	-	12799449	-	-	BIOGRID	COCA2|FCC2|HNPCC|HNPCC2|hMLH1	COCA1|FCC1|HNPCC|HNPCC1|LCFS2	-	-	-	Low Throughput
1261406	Wan C (2015)	112666	108258	250.404	Co-fractionation	physical	interacts with	-	6790 (interacts with) 1938	AURKA	EEF2	9606	9606	-	26344197	Fractionation was combined with mass spectrometry from five diverse animal species to predict co-complex protein interactions conserved across metazoa using an integrative computational scoring procedure along with an SVM approach. The significant data set of 16655 PPI, was derived from a set of more than 1M interactions by examining a ROC curve of predicted interactions against reference annotat…	0.0959384	BIOGRID	AIK|ARK1|AURA|AURORA2|BTAK|PPP1R47|STK15|STK6|STK7	EEF-2|EF-2|EF2|SCA26	RP5-1167H4.6	-	-	High Throughput
1266500	Wan C (2015)	112666	111234	163.066	Co-fractionation	physical	interacts with	-	6790 (interacts with) 5213	AURKA	PFKM	9606	9606	-	26344197	Fractionation was combined with mass spectrometry from five diverse animal species to predict co-complex protein interactions conserved across metazoa using an integrative computational scoring procedure along with an SVM approach. The significant data set of 16655 PPI, was derived from a set of more than 1M interactions by examining a ROC curve of predicted interactions against reference annotat…	0.132871	BIOGRID	AIK|ARK1|AURA|AURORA2|BTAK|PPP1R47|STK15|STK6|STK7	ATP-PFK|GSD7|PFK-1|PFK1|PFKA|PFKX|PPP1R122	RP5-1167H4.6	-	-	High Throughput
2540058	Yu Z (1998)	111742	111185	83.7997	Reconstituted Complex	physical	interacts with	-	5777 (interacts with) 5159	PTPN6	PDGFRB	9606	9606	-	9452499	-	-	BIOGRID	HCP|HCPH|HPTP1C|PTP-1C|SH-PTP1|SHP-1|SHP-1L|SHP1	CD140B|IBGC4|IMF1|JTK12|PDGFR|PDGFR-1|PDGFR1	-	-	-	Low Throughput
2561482	Pasquet JM (2000)	111742	110245	104.834	Affinity Capture-Western	physical	interacts with	-	5777 (interacts with) 4067	PTPN6	LYN	9606	9606	-	10871605	-	-	BIOGRID	HCP|HCPH|HPTP1C|PTP-1C|SH-PTP1|SHP-1|SHP-1L|SHP1	JTK8|p53Lyn|p56Lyn	-	-	-	Low Throughput
427083	Cannavo E (2007)	110438	111304	89.3556	Affinity Capture-MS	physical	interacts with	-	4292 (interacts with) 5286	MLH1	PIK3C2A	9606	9606	-	17148452	-	-	BIOGRID	COCA2|FCC2|HNPCC|HNPCC2|hMLH1	CPK|PI3-K-C2(ALPHA)|PI3-K-C2A	-	-	-	Low Throughput
427088	Cannavo E (2007)	110438	106987	106.738	Affinity Capture-MS	physical	interacts with	-	4292 (interacts with) 498	MLH1	ATP5A1	9606	9606	-	17148452	-	-	BIOGRID	COCA2|FCC2|HNPCC|HNPCC2|hMLH1	ATP5A|ATP5AL2|ATPM|COXPD22|HEL-S-123m|MC5DN4|MOM2|OMR|ORM|hATP1	-	-	-	Low Throughput
427087	Cannavo E (2007)	110438	111792	102.59	Affinity Capture-MS	physical	interacts with	-	4292 (interacts with) 5834	MLH1	PYGB	9606	9606	-	17148452	-	-	BIOGRID	COCA2|FCC2|HNPCC|HNPCC2|hMLH1	GPBB	-	RP5-965G21.1	-	Low Throughput
2389159	Frank C (2004)	111742	107420	220.046	Biochemical Activity	physical	interacts with	Dephosphorylation	5777 (interacts with) 983	PTPN6	CDK1	9606	9606	-	14699166	-	-	BIOGRID	HCP|HCPH|HPTP1C|PTP-1C|SH-PTP1|SHP-1|SHP-1L|SHP1	CDC2|CDC28A|P34CDC2	-	-	-	Low Throughput
2459922	Seo DW (2003)	111742	109992	106.881	Affinity Capture-Western	physical	interacts with	-	5777 (interacts with) 3791	PTPN6	KDR	9606	9606	-	12887919	-	-	BIOGRID	HCP|HCPH|HPTP1C|PTP-1C|SH-PTP1|SHP-1|SHP-1L|SHP1	CD309|FLK1|VEGFR|VEGFR2	-	-	-	Low Throughput
954124	Fogeron ML (2013)	112666	109535	174.243	Affinity Capture-MS	physical	interacts with	-	6790 (interacts with) 3303	AURKA	HSPA1A	9606	9606	-	23443559	-	-	BIOGRID	AIK|ARK1|AURA|AURORA2|BTAK|PPP1R47|STK15|STK6|STK7	HEL-S-103|HSP70-1|HSP70-1A|HSP70I|HSP72|HSPA1	RP5-1167H4.6	DAQB-147D11.1	-	High Throughput
427063	Cannavo E (2007)	110438	113871	79.3255	Affinity Capture-MS	physical	interacts with	-	4292 (interacts with) 8243	MLH1	SMC1A	9606	9606	-	17148452	-	-	BIOGRID	COCA2|FCC2|HNPCC|HNPCC2|hMLH1	CDLS2|DXS423E|SB1.8|SMC1|SMC1L1|SMC1alpha|SMCB	-	RP6-29D12.1	-	Low Throughput
427070	Cannavo E (2007)	110438	111577	184.482	Affinity Capture-MS	physical	interacts with	-	4292 (interacts with) 5591	MLH1	PRKDC	9606	9606	-	17148452	-	-	BIOGRID	COCA2|FCC2|HNPCC|HNPCC2|hMLH1	DNA-PKcs|DNAPK|DNPK1|HYRC|HYRC1|IMD26|XRCC7|p350	-	-	-	Low Throughput
245348	Wang Y (2000)	110438	106962	129.134	Co-purification	physical	interacts with	-	4292 (interacts with) 472	MLH1	ATM	9606	9606	-	10783165	-	-	BIOGRID	COCA2|FCC2|HNPCC|HNPCC2|hMLH1	AT1|ATA|ATC|ATD|ATDC|ATE|TEL1|TELO1	-	-	-	Low Throughput
2296309	Li X (2016)	111742	107083	128.442	Affinity Capture-MS	physical	interacts with	-	5777 (interacts with) 613	PTPN6	BCR	9606	9606	-	27432908	high-confidence candidate interacting protein	-	BIOGRID	HCP|HCPH|HPTP1C|PTP-1C|SH-PTP1|SHP-1|SHP-1L|SHP1	ALL|BCR1|CML|D22S11|D22S662|PHL	-	-	-	High Throughput
2212074	Yao Z (2017)	111742	108378	75.6594	Biochemical Activity	physical	interacts with	Dephosphorylation	5777 (interacts with) 2066	PTPN6	ERBB4	9606	9606	-	28065597	-	-	BIOGRID	HCP|HCPH|HPTP1C|PTP-1C|SH-PTP1|SHP-1|SHP-1L|SHP1	ALS19|HER4|p180erbB4	-	-	-	Low Throughput
280210	Pan ZZ (2002)	112506	111581	179.117	Affinity Capture-Western	physical	interacts with	-	6622 (interacts with) 5595	SNCA	MAPK3	9606	9606	-	12121974	-	-	BIOGRID	NACP|PARK1|PARK4|PD1	ERK-1|ERK1|ERT2|HS44KDAP|HUMKER1A|P44ERK1|P44MAPK|PRKM3|p44-ERK1|p44-MAPK	-	-	-	Low Throughput
1416576	Grossmann A (2015)	111742	111719	110.74	Affinity Capture-Luminescence	physical	interacts with	-	5777 (interacts with) 5747	PTPN6	PTK2	9606	9606	-	25814554	-	-	BIOGRID	HCP|HCPH|HPTP1C|PTP-1C|SH-PTP1|SHP-1|SHP-1L|SHP1	FADK|FAK|FAK1|FRNK|PPP1R71|p125FAK|pp125FAK	-	-	-	High Throughput
280212	Pan ZZ (2002)	112506	111585	180.317	Affinity Capture-Western	physical	interacts with	-	6622 (interacts with) 5599	SNCA	MAPK8	9606	9606	-	12121974	-	-	BIOGRID	NACP|PARK1|PARK4|PD1	JNK|JNK-46|JNK1|JNK1A2|JNK21B1/2|PRKM8|SAPK1|SAPK1c	-	-	-	Low Throughput
2209082	Matalon O (2016)	111742	111351	48.0783	Affinity Capture-Western	physical	interacts with	-	5777 (interacts with) 5335	PTPN6	PLCG1	9606	9606	-	27221712	-	-	BIOGRID	HCP|HCPH|HPTP1C|PTP-1C|SH-PTP1|SHP-1|SHP-1L|SHP1	NCKAP3|PLC-II|PLC1|PLC148|PLCgamma1	-	RP3-511B24.2	-	Low Throughput
954091	Fogeron ML (2013)	112666	107841	258.996	Affinity Capture-MS	physical	interacts with	-	6790 (interacts with) 1457	AURKA	CSNK2A1	9606	9606	-	23443559	-	-	BIOGRID	AIK|ARK1|AURA|AURORA2|BTAK|PPP1R47|STK15|STK6|STK7	CK2A1|CKII|CSNK2A3	RP5-1167H4.6	-	-	High Throughput
954093	Fogeron ML (2013)	112666	109545	170.771	Affinity Capture-MS	physical	interacts with	-	6790 (interacts with) 3313	AURKA	HSPA9	9606	9606	-	23443559	-	-	BIOGRID	AIK|ARK1|AURA|AURORA2|BTAK|PPP1R47|STK15|STK6|STK7	CRP40|CSA|GRP-75|GRP75|HEL-S-124m|HSPA9B|MOT|MOT2|MTHSP75|PBP74	RP5-1167H4.6	-	-	High Throughput
954092	Fogeron ML (2013)	112666	115457	257.294	Affinity Capture-MS	physical	interacts with	-	6790 (interacts with) 10155	AURKA	TRIM28	9606	9606	-	23443559	-	-	BIOGRID	AIK|ARK1|AURA|AURORA2|BTAK|PPP1R47|STK15|STK6|STK7	KAP1|PPP1R157|RNF96|TF1B|TIF1B	RP5-1167H4.6	-	-	High Throughput
303327	Mizuno K (1996)	111742	110129	98.3043	Affinity Capture-Western	physical	interacts with	-	5777 (interacts with) 3937	PTPN6	LCP2	9606	9606	-	8760799	-	-	BIOGRID	HCP|HCPH|HPTP1C|PTP-1C|SH-PTP1|SHP-1|SHP-1L|SHP1	SLP-76|SLP76	-	-	-	Low Throughput
317115	Ram PA (1997)	111742	112654	67.8595	Affinity Capture-Western	physical	interacts with	-	5777 (interacts with) 6777	PTPN6	STAT5B	9606	9606	-	9211920	-	-	BIOGRID	HCP|HCPH|HPTP1C|PTP-1C|SH-PTP1|SHP-1|SHP-1L|SHP1	STAT5	-	-	-	Low Throughput
301289	Keilhack H (1998)	111742	108276	560.544	Affinity Capture-Western	physical	interacts with	-	5777 (interacts with) 1956	PTPN6	EGFR	9606	9606	-	9733788	-	-	BIOGRID	HCP|HCPH|HPTP1C|PTP-1C|SH-PTP1|SHP-1|SHP-1L|SHP1	ERBB|ERBB1|HER1|NISBD2|PIG61|mENA	-	-	-	Low Throughput
954085	Fogeron ML (2013)	112666	110247	206.579	Affinity Capture-MS	physical	interacts with	-	6790 (interacts with) 4069	AURKA	LYZ	9606	9606	-	23443559	-	-	BIOGRID	AIK|ARK1|AURA|AURORA2|BTAK|PPP1R47|STK15|STK6|STK7	LZM	RP5-1167H4.6	-	-	High Throughput
287637	Caselli A (2002)	111742	107305	213.611	Affinity Capture-Western	physical	interacts with	-	5777 (interacts with) 857	PTPN6	CAV1	9606	9606	-	12176037	-	-	BIOGRID	HCP|HCPH|HPTP1C|PTP-1C|SH-PTP1|SHP-1|SHP-1L|SHP1	BSCL3|CGL3|LCCNS|MSTP085|PPH3|VIP21	-	-	-	Low Throughput
296871	Yetter A (1995)	111742	109919	76.0484	Biochemical Activity	physical	interacts with	Dephosphorylation	5777 (interacts with) 3716	PTPN6	JAK1	9606	9606	-	7629131	-	-	BIOGRID	HCP|HCPH|HPTP1C|PTP-1C|SH-PTP1|SHP-1|SHP-1L|SHP1	JAK1A|JAK1B|JTK3	-	-	-	Low Throughput
296872	Yetter A (1995)	111742	113148	103.668	Biochemical Activity	physical	interacts with	Dephosphorylation	5777 (interacts with) 7297	PTPN6	TYK2	9606	9606	-	7629131	-	-	BIOGRID	HCP|HCPH|HPTP1C|PTP-1C|SH-PTP1|SHP-1|SHP-1L|SHP1	IMD35|JTK1	-	-	-	Low Throughput
954062	Fogeron ML (2013)	112666	110929	249.666	Affinity Capture-MS	physical	interacts with	-	6790 (interacts with) 4869	AURKA	NPM1	9606	9606	-	23443559	-	-	BIOGRID	AIK|ARK1|AURA|AURORA2|BTAK|PPP1R47|STK15|STK6|STK7	B23|NPM	RP5-1167H4.6	-	-	High Throughput
948508	Chou CH (2013)	112666	109187	167.563	Affinity Capture-Western	physical	interacts with	-	6790 (interacts with) 2932	AURKA	GSK3B	9606	9606	-	23204235	-	-	BIOGRID	AIK|ARK1|AURA|AURORA2|BTAK|PPP1R47|STK15|STK6|STK7	-	RP5-1167H4.6	-	-	Low Throughput
2600986	Yan S (2017)	109268	106652	82.6215	Affinity Capture-Western	physical	interacts with	-	3014 (interacts with) 142	H2AFX	PARP1	9606	9606	-	28796254	-	-	BIOGRID	H2A.X|H2A/X|H2AX	ADPRT|ADPRT 1|ADPRT1|ARTD1|PARP|PARP-1|PPOL|pADPRT-1	-	RP11-125A15.2	-	Low Throughput
2595307	Leung JW (2017)	109268	107841	180.741	Affinity Capture-MS	physical	interacts with	-	3014 (interacts with) 1457	H2AFX	CSNK2A1	9606	9606	-	28242625	-	-	BIOGRID	H2A.X|H2A/X|H2AX	CK2A1|CKII|CSNK2A3	-	-	-	High Throughput
858181	Irelan JT (2007)	112666	107569	185.683	Affinity Capture-Western	physical	interacts with	-	6790 (interacts with) 1147	AURKA	CHUK	9606	9606	-	17939994	-	-	BIOGRID	AIK|ARK1|AURA|AURORA2|BTAK|PPP1R47|STK15|STK6|STK7	IKBKA|IKK-alpha|IKK1|IKKA|NFKBIKA|TCF16	RP5-1167H4.6	-	-	Low Throughput
858491	Fu J (2009)	112666	106829	230.662	Biochemical Activity	physical	interacts with	Phosphorylation	6790 (interacts with) 332	AURKA	BIRC5	9606	9606	-	19357306	-	-	BIOGRID	AIK|ARK1|AURA|AURORA2|BTAK|PPP1R47|STK15|STK6|STK7	API4|EPR-1	RP5-1167H4.6	-	-	Low Throughput
858485	Fu J (2009)	112666	113895	503.919	Biochemical Activity	physical	interacts with	Phosphorylation	6790 (interacts with) 8290	AURKA	HIST3H3	9606	9606	-	19357306	-	-	BIOGRID	AIK|ARK1|AURA|AURORA2|BTAK|PPP1R47|STK15|STK6|STK7	H3.4|H3/g|H3FT|H3t	RP5-1167H4.6	-	-	Low Throughput
737655	Olah J (2011)	112666	106848	1280.66	Reconstituted Complex	physical	interacts with	-	6790 (interacts with) 351	AURKA	APP	9606	9606	-	21832049	-	-	BIOGRID	AIK|ARK1|AURA|AURORA2|BTAK|PPP1R47|STK15|STK6|STK7	AAA|ABETA|ABPP|AD1|APPI|CTFgamma|CVAP|PN-II|PN2	RP5-1167H4.6	-	-	High Throughput
2595293	Leung JW (2017)	109268	108126	235.892	Affinity Capture-MS	physical	interacts with	-	3014 (interacts with) 1789	H2AFX	DNMT3B	9606	9606	-	28242625	-	-	BIOGRID	H2A.X|H2A/X|H2AX	ICF|ICF1|M.HsaIIIB	-	RP5-1085F17.2	-	High Throughput
680489	Zou L (2011)	112666	112878	151.678	Affinity Capture-Western	physical	interacts with	-	6790 (interacts with) 7020	AURKA	TFAP2A	9606	9606	-	21829699	figure 5.	-	BIOGRID	AIK|ARK1|AURA|AURORA2|BTAK|PPP1R47|STK15|STK6|STK7	AP-2|AP-2alpha|AP2TF|BOFS|TFAP2	RP5-1167H4.6	RP1-290I10.1	-	Low Throughput
719741	Xu ZX (2005)	112666	111384	199.205	Affinity Capture-Western	physical	interacts with	-	6790 (interacts with) 5371	AURKA	PML	9606	9606	-	15749021	-	-	BIOGRID	AIK|ARK1|AURA|AURORA2|BTAK|PPP1R47|STK15|STK6|STK7	MYL|PP8675|RNF71|TRIM19	RP5-1167H4.6	-	-	Low Throughput
559253	Chow C (2011)	112666	116356	121.817	Biochemical Activity	physical	interacts with	Phosphorylation	6790 (interacts with) 11186	AURKA	RASSF1	9606	9606	-	21874044	-	-	BIOGRID	AIK|ARK1|AURA|AURORA2|BTAK|PPP1R47|STK15|STK6|STK7	123F2|NORE2A|RASSF1A|RDA32|REH3P21	RP5-1167H4.6	-	-	Low Throughput
2595274	Leung JW (2017)	109268	114445	289.294	Affinity Capture-MS	physical	interacts with	-	3014 (interacts with) 8932	H2AFX	MBD2	9606	9606	-	28242625	-	-	BIOGRID	H2A.X|H2A/X|H2AX	DMTase|NY-CO-41	-	-	-	High Throughput
531360	Pugacheva EN (2007)	112666	109316	182.232	Reconstituted Complex	physical	interacts with	-	6790 (interacts with) 3066	AURKA	HDAC2	9606	9606	-	17604723	-	-	BIOGRID	AIK|ARK1|AURA|AURORA2|BTAK|PPP1R47|STK15|STK6|STK7	HD2|RPD3|YAF1	RP5-1167H4.6	-	-	Low Throughput
531359	Pugacheva EN (2007)	112666	115330	230.025	Reconstituted Complex	physical	interacts with	-	6790 (interacts with) 10013	AURKA	HDAC6	9606	9606	-	17604723	-	-	BIOGRID	AIK|ARK1|AURA|AURORA2|BTAK|PPP1R47|STK15|STK6|STK7	CPBHM|HD6|PPP1R90	RP5-1167H4.6	JM21	-	Low Throughput
2595277	Leung JW (2017)	109268	116123	216.029	Affinity Capture-MS	physical	interacts with	-	3014 (interacts with) 10919	H2AFX	EHMT2	9606	9606	-	28242625	-	-	BIOGRID	H2A.X|H2A/X|H2AX	BAT8|C6orf30|G9A|GAT8|KMT1C|NG36	-	DAAP-66K18.3	-	High Throughput
1526172	Zhu H (2008)	106747	111577	1738	Affinity Capture-Western	physical	interacts with	-	246 (interacts with) 5591	ALOX15	PRKDC	9606	9606	-	18785202	Figure 4	-	BIOGRID	12-LOX|15-LOX-1|15LOX-1	DNA-PKcs|DNAPK|DNPK1|HYRC|HYRC1|IMD26|XRCC7|p350	-	-	-	Low Throughput
243020	Ewing RM (2007)	112666	112531	828.653	Affinity Capture-MS	physical	interacts with	-	6790 (interacts with) 6648	AURKA	SOD2	9606	9606	-	17353931	Exogenous expression of bait	0.323	BIOGRID	AIK|ARK1|AURA|AURORA2|BTAK|PPP1R47|STK15|STK6|STK7	IPOB|MNSOD|MVCD6	RP5-1167H4.6	RP1-56L9.2	-	High Throughput
[truncated: 5,186 more rows]
