# Supplementary material for: Small molecules for cell reprogramming: a systems biology analysis
Source: Aging (Albany NY). 2021 Dec 17;13(24):25739–62. doi: 10.18632/aging.203791 (PMC8751603; doi:10.18632/aging.203791)
Supplement: Supplementary Table 10 [file aging-13-203791-s011.xlsx]

## Sheet: ST 10
Supplementary Table 10. Common targets of different SM/metabolite sets.
Common targets (n = 782) of all 210 SM-like human metabolites and all 92 SMs			Common targets (n =132) of all 210 SM-like human metabolites and all 10 SM cocktails			Common targets (n=43) of all 10 SM cocktails and 8 human metabolites which are SMs
Gene symbol	Entrez ID		Gene symbol	Entrez ID		Gene symbol	Entrez ID
ABAT	18		ABAT	18		PARP1	142
ABCA4	24		ACADM	34		AKT1	207
ABL1	25		ACADSB	36		STS	412
ABL2	27		ACHE	43		CCND1	595
ACACB	32		ADCY1	107		BCL2	596
ACADM	34		ADCY2	108		CASP3	836
ACADSB	36		ADCY3	109		CASP8	841
ACHE	43		ADCY5	111		CASP9	842
ACTA1	58		ADCY6	112		CEBPA	1050
ACTA2	59		ADCY7	113		CES1	1066
ACTB	60		ADCY8	114		CREB1	1385
ACTC1	70		ADCY9	115		CTNNB1	1499
ACTL6A	86		PARP1	142		CYP1A1	1543
ACVR1	90		ADRB2	154		CYP2A6	1548
ACY1	95		AHCY	191		CYP2B6	1555
ADCY1	107		AHR	196		CYP2C9	1559
ADCY2	108		AKT1	207		FBP1	2203
ADCY3	109		ALPP	250		HDAC1	3065
ADCY5	111		APEX1	328		IFNG	3458
ADCY6	112		BIRC5	332		IRF1	3659
ADCY7	113		AR	367		MAOA	4128
ADCY8	114		STS	412		MAOB	4129
ADCY9	115		ATR	545		ABCB1	5243
ADH1A	124		CCND1	595		MAPK1	5594
ADH1B	125		BCL2	596		MAPK3	5595
ADH4	127		BCL2L1	598		MAP2K1	5604
ADH5	128		BID	637		RARA	5914
ADH6	130		BMP7	655		RARB	5915
ADH7	131		CASP3	836		RARG	5916
ADK	132		CASP8	841		RB1	5925
ADM	133		CASP9	842		RBP1	5947
ADORA1	134		CDA	978		RXRA	6256
ADORA2A	135		CDK1	983		SP1	6667
ADORA2B	136		CDH1	999		STAT1	6772
ADORA3	140		CDKN1A	1026		TERT	7015
PARP1	142		CDKN2B	1030		TP53	7157
ADRB2	154		CES1	1066		UGT2B7	7364
AGT	183		COL1A2	1278		H3-4	8290
AHCY	191		CSNK2A1	1457		NR1H4	9971
AHR	196		CTNNB1	1499		WIF1	11197
AKT1	207		CYP1A1	1543		UGT1A6	54578
AKT2	208		CYP2A6	1548		SOX17	64321
ALB	213		CYP2B6	1555		H4-16	121504
ALDH1A1	216		CYP2C9	1559
ALDH3A1	218		NQO1	1728
ALDH1A3	220		DNMT1	1786
AKR1B1	231		DNMT3B	1789
ALOX12	239		DPYD	1806
ALOX5	240		DUSP1	1843
ALOX15	246		ELK1	2002
ALOX15B	247		EPHA1	2041
ALPL	249		ESR1	2099
ALPP	250		ESR2	2100
AMD1	262		ESRRA	2101
ANXA1	301		F2	2147
AOX1	316		F3	2152
APEX1	328		FBP1	2203
BIRC3	330		GNAL	2774
BIRC5	332		GNAS	2778
APOA1	335		GSK3B	2932
APOA2	336		GSTP1	2950
APOA4	337		GUCY1A1	2982
APOB	338		GUCY1B1	2983
APOC3	345		GUCY2C	2984
APOE	348		GUCY2F	2986
APP	351		GUCY2D	3000
FAS	355		H2AX	3014
AR	367		HDAC1	3065
ARNT	405		HDAC2	3066
STS	412		HRH1	3269
ASPH	444		HSD3B2	3284
ATM	472		IFNG	3458
FXYD2	486		JAK2	3717
ATP5F1A	498		LEP	3952
ATP5F1B	506		LYZ	4069
ATP5F1C	509		MAOA	4128
ATR	545		MAOB	4129
AXL	558		MLH1	4292
B2M	567		ABCC1	4363
BAAT	570		MSH2	4436
BAD	572		NPR1	4881
BAK1	578		NPR2	4882
BAX	581		NPR3	4883
CCND1	595		OGDH	4967
BCL2	596		ABCB1	5243
BCL2L1	598		PIK3CA	5290
OPN1SW	611		PLA2G2A	5320
BDNF	627		POLG	5428
BID	637		MAPK1	5594
BLK	640		MAPK3	5595
BMP7	655		MAP2K1	5604
BMX	660		PRSS1	5644
BRAF	673		PTEN	5728
BTK	695		PTPN6	5777
C5	727		PEX19	5824
CA2	760		RARA	5914
CA4	762		RARB	5915
CALCA	796		RB1	5925
CASP3	836		RBP1	5947
CASP7	840		RELA	5970
CASP8	841		ROS1	6098
CASP9	842		RXRA	6256
CAT	847		SCN1A	6323
CAV1	857		SCN4A	6329
CCNA2	890		CXCL5	6374
CCNE1	898		CXCL12	6387
CCNH	902		SNCA	6622
CDA	978		SP1	6667
CDK1	983		STAT1	6772
CDC25C	995		STAT3	6774
CDH1	999		TGFBR1	7046
CDK2	1017		TGFBR2	7048
CDK4	1019		TLR4	7099
CDK5	1020		TP53	7157
CDKN1A	1026		TYMS	7298
CDKN1B	1027		UGT2B7	7364
CDKN2B	1030		ALDH5A1	7915
CEBPB	1051		H3-4	8290
CEL	1056		HDAC3	8841
CES1	1066		MBD2	8932
CETP	1071		KDM4A	9682
CFTR	1080		HDAC6	10013
CHEK1	1111		CYP46A1	10858
CHUK	1147		BTG3	10950
CKB	1152		HPGDS	27306
CLK3	1198		UGT1A6	54578
CLPS	1208		L1TD1	54596
COL1A2	1278		SOX17	64321
COMP	1311		MAP1LC3B	81631
COMT	1312		DOT1L	84444
CRABP1	1381		H4-16	121504
CRABP2	1382		ADCY4	196883
CS	1431
MAPK14	1432
CSF2	1437
CSK	1445
CSNK1D	1453
CSNK1E	1454
CSNK2A1	1457
CSNK2A2	1459
CTNNB1	1499
CTSD	1509
CYP1A1	1543
CYP1A2	1544
CYP2A6	1548
CYP2A7	1549
CYP3A7	1551
CYP2A13	1553
CYP2B6	1555
CYP2C19	1557
CYP2C8	1558
CYP2C9	1559
CYP2C18	1562
CYP2D6	1565
CYP2F1	1572
CYP2J2	1573
CYP3A4	1576
CYP3A5	1577
CYP4A11	1579
CYP4B1	1580
CYP11A1	1583
CYP17A1	1586
CYP26A1	1592
DHPS	1725
NQO1	1728
DIO2	1734
DNMT1	1786
DNMT3B	1789
DPYD	1806
DRD4	1815
DUSP1	1843
DYRK1A	1859
ECE1	1889
EDN1	1906
EEF2	1938
EGF	1950
EGFR	1956
EPHA2	1969
EIF4G1	1981
EIF5A	1984
ELK1	2002
MARK2	2011
EPHA1	2041
EPHA3	2042
EPHA4	2043
EPHA5	2044
EPHA7	2045
EPHA8	2046
EPHB1	2047
EPHB2	2048
EPHB3	2049
EPHB4	2050
ERBB2	2064
ERBB3	2065
ERBB4	2066
ERN1	2081
ESR1	2099
ESR2	2100
ESRRA	2101
F2	2147
F3	2152
F5	2153
FBP1	2203
FCER2	2208
GPC4	2239
FER	2241
FES	2242
FGFR1	2260
FGFR3	2261
GPC5	2262
FGFR2	2263
FGR	2268
FKBP1A	2280
FKBP1B	2281
FKBP2	2286
FKBP3	2287
FKBP4	2288
FOXO3	2309
FLT1	2321
FLT3	2322
FLT4	2324
FN1	2335
FOS	2353
FOSB	2354
MTOR	2475
FYN	2534
G6PD	2539
GABRA1	2554
GABRA2	2555
GABRA5	2558
GABRB1	2560
GABRB2	2561
GABRD	2563
GABRE	2564
GABRR1	2569
GABRR2	2570
GAK	2580
GC	2638
GPC3	2719
GCLM	2730
GLRA1	2741
GNAL	2774
GNAS	2778
GPC1	2817
GPI	2821
GRK4	2868
GRK6	2870
GPX1	2876
GPX2	2877
GRIN1	2902
GRIN2A	2903
GRIN2D	2906
GRM2	2912
GRM3	2913
GRM5	2915
CXCL1	2919
GSK3B	2932
GSR	2936
GSS	2937
GSTM1	2944
GSTP1	2950
GUCY1A1	2982
GUCY1B1	2983
GUCY2C	2984
GUCY2F	2986
GUCY2D	3000
H2AX	3014
HAGH	3029
HAL	3034
SERPIND1	3053
HCK	3055
HDAC1	3065
HDAC2	3066
HEXB	3074
HIF1A	3091
HMGCR	3156
HMOX1	3162
HPGD	3248
HRH1	3269
HSD3B1	3283
HSD3B2	3284
HSD11B2	3291
HSD17B1	3292
HSF1	3297
HSPA1A	3303
HSPB1	3315
HSPG2	3339
HTR1B	3351
HTR1E	3354
HTR1F	3355
HTR3A	3359
HTR6	3362
IFNG	3458
IGF1	3479
IGF1R	3480
IKBKB	3551
IL1B	3553
IL2	3558
IL2RA	3559
IL4	3565
IL6	3569
CXCL8	3576
IL10	3586
IL13	3596
INCENP	3619
CXCL10	3627
INS	3630
ITK	3702
JAK1	3716
JAK2	3717
JAK3	3718
JUN	3725
JUNB	3726
JUND	3727
KCNH2	3757
KDR	3791
KIT	3815
LCK	3932
LCN2	3934
LCP2	3937
LDLR	3949
LEP	3952
LGALS3	3958
LIPC	3990
LPO	4025
LRP1	4035
LRP2	4036
LTA4H	4048
LTC4S	4056
LTF	4057
LYN	4067
LYZ	4069
SMAD1	4086
SMAD2	4087
SMAD3	4088
MAOA	4128
MAOB	4129
MARK3	4140
MATK	4145
MCL1	4170
MET	4233
MGAT5	4249
MIF	4282
MLH1	4292
MAP3K9	4293
MAP3K10	4294
MAP3K11	4296
MME	4311
MMP1	4312
MMP2	4313
MMP9	4318
MMP13	4322
MNAT1	4331
MPO	4353
ABCC1	4363
MSH2	4436
MTAP	4507
MYO1F	4542
MYH1	4619
MYH2	4620
MYH4	4622
MYH7	4625
MYH8	4626
MYH9	4627
MYH11	4629
MYLK	4638
MYO1C	4641
MYO1D	4642
MYO1E	4643
MYO5A	4644
MYO5B	4645
MYO6	4646
MYO7A	4647
MYO9A	4649
MYO10	4651
NFE2L2	4780
NFKB1	4790
NFKBIA	4792
NFKBIB	4793
NQO2	4835
NOS2	4843
NOS3	4846
NOTCH1	4851
PNP	4860
NPR1	4881
NPR2	4882
NPR3	4883
NT5E	4907
NTRK1	4914
NTRK2	4915
NTRK3	4916
DDR2	4921
ODC1	4953
OGDH	4967
OLR1	4973
PAEP	5047
SERPINE1	5054
PAK2	5062
PCNA	5111
PDE2A	5138
PDE3B	5140
PDE4B	5142
PDE4C	5143
PDE4D	5144
PDE6G	5148
PDE7A	5150
PDE8A	5151
PDE9A	5152
PDGFRA	5156
PDGFRB	5159
PDPK1	5170
PFKFB1	5207
PFKFB2	5208
PFKFB3	5209
PFKFB4	5210
PFKL	5211
PFKM	5213
PFKP	5214
PGD	5226
ABCB1	5243
PHF2	5253
SERPINA1	5265
PIK3C2A	5286
PIK3C2B	5287
PIK3C3	5289
PIK3CA	5290
PIK3CB	5291
PIM1	5292
PIK3CD	5293
PIK3CG	5294
PIN1	5300
PKLR	5313
PKM	5315
PLA2G2A	5320
PLAT	5327
PLAU	5328
PLCG1	5335
PNLIP	5406
POLG	5428
POMC	5443
PON1	5444
POR	5447
PPARA	5465
PPARG	5468
PPIA	5478
PPP2CA	5515
PPP2R5D	5528
PRKAA1	5562
PRKAA2	5563
PRKCA	5578
PRKCB	5579
PRKCD	5580
PRKDC	5591
MAPK1	5594
MAPK3	5595
MAPK8	5599
MAPK9	5601
MAPK10	5602
MAP2K1	5604
MAP2K2	5605
EIF2AK2	5610
PRL	5617
PTEN	5728
PTGS1	5742
PTGS2	5743
PTK2	5747
PTK6	5753
PTPN6	5777
PEX19	5824
PXN	5829
PYGB	5834
PYGL	5836
PYGM	5837
RAF1	5894
RARA	5914
RARB	5915
RB1	5925
RBL2	5934
RBP1	5947
RBP2	5948
RBP4	5950
OPN1LW	5956
RDH5	5959
RELA	5970
REN	5972
RET	5979
RHO	6010
RLBP1	6017
RNASEL	6041
RORA	6095
ROS1	6098
RPE65	6121
RPS6KA1	6195
RPS6KA2	6196
RPS6KA3	6197
RPS6KB1	6198
RPS6KB2	6199
RXRA	6256
RXRB	6257
RYR1	6261
SAT1	6303
SCN1A	6323
SCN4A	6329
CCL2	6347
CXCL5	6374
SDC1	6382
SDC2	6383
SDC4	6385
CXCL12	6387
SDHA	6389
SGK1	6446
SLC2A1	6513
SLC2A2	6514
SLC22A1	6580
SMS	6611
SNCA	6622
SOD2	6648
SP1	6667
SRC	6714
SREBF2	6721
SRM	6723
SRMS	6725
SSTR1	6751
STAT1	6772
STAT3	6774
SULT1E1	6783
STK10	6793
STK11	6794
SULT1A2	6799
SULT1A1	6817
SULT1A3	6818
SYK	6850
MAP3K7	6885
PRDX2	7001
TEC	7006
TF	7018
TGFA	7039
TGFB1	7040
TGFB2	7042
TGFBR1	7046
TGFBR2	7048
TGM2	7052
THBS1	7057
THBS2	7058
THBS3	7059
THBS4	7060
TLR4	7099
TNF	7124
TOP1	7150
TOP2A	7153
TP53	7157
TPO	7173
GFUS	7264
TTR	7276
TUFM	7284
TXK	7294
TXNRD1	7296
TYK2	7297
TYMS	7298
TYR	7299
UGT2B4	7363
UGT2B7	7364
UGT2B10	7365
UGT2B15	7366
UGT2B17	7367
UGT8	7368
KDM6A	7403
VEGFA	7422
WEE1	7465
XBP1	7494
XDH	7498
YES1	7525
ZAP70	7535
LRP8	7804
PXDN	7837
ALDH5A1	7915
FGF23	8074
NCOA3	8202
PNPLA4	8228
SMC1A	8243
EPX	8288
H3-4	8290
BBOX1	8424
DYRK2	8445
YARS1	8565
RDH16	8608
HSD17B6	8630
AOC3	8639
AKR1C3	8644
ABCB11	8647
PDE5A	8654
DGAT1	8694
ABCC3	8714
TNFSF10	8743
RIPK2	8767
FBP2	8789
TNFRSF10B	8795
CES2	8824
HDAC3	8841
ALDH1A2	8854
NR1I2	8856
PER2	8864
SPHK1	8877
CCNA1	8900
MBD2	8932
AIFM1	9131
AURKB	9212
LRAT	9227
STK17B	9262
ABCG2	9429
NCOR1	9611
ABCG1	9619
IQCB1	9657
SDC3	9672
KDM4A	9682
SLK	9748
NR1I3	9970
HDAC6	10013
ABCC5	10057
GPC6	10082
ACTR3	10096
ACTR2	10097
ACTR1B	10120
ACTR1A	10121
NAMPT	10135
AASS	10157
TNK2	10188
ABCC4	10257
MERTK	10461
ERN2	10595
UGT2B11	10720
ACTL7B	10880
ACTL7A	10881
PPARGC1A	10891
MALT1	10892
DHRS4	10901
BTG3	10950
ACOT2	10965
CHEK2	11200
MYH15	22989
KDM1A	23028
SMG1	23049
KDM4C	23081
PHF8	23133
KDM6B	23135
SIK2	23235
PLCB1	23236
SIRT3	23410
SIRT1	23411
ETHE1	23474
PNKD	25953
ABHD12	26090
HIBCH	26275
PDCD4	27250
SULT1B1	27284
HPGDS	27306
RPS6KA6	27330
MAT2B	27430
TBK1	29110
CYP2S1	29785
PLA2G2E	30814
NSDHL	50814
ABHD17B	51104
RDH11	51109
LACTB2	51110
MYO15A	51168
ACTL6B	51412
MAP3K20	51776
KDM3B	51780
MYO3A	53904
UGT2B28	54490
SMOX	54498
UGT1A10	54575
UGT1A8	54576
UGT1A7	54577
UGT1A6	54578
UGT1A5	54579
EGLN1	54583
L1TD1	54596
UGT1A9	54600
UGT1A4	54657
UGT1A1	54658
UGT1A3	54659
RETSAT	54884
ALKBH5	54890
RASIP1	54922
OGFOD1	55239
HIF1AN	55662
KDM4D	55693
ACTR10	55860
MYO5C	55930
CYP26B1	56603
DIABLO	56616
EIF5A2	56648
AKR1B10	57016
TIGAR	57103
ACTR3B	57180
MYH7B	57644
RDH14	57665
MARK4	57787
CYP4F11	57834
CXCL16	58191
ABHD17C	58489
MYO1G	64005
RBKS	64080
SOX17	64321
WNK2	65268
CYP4F12	66002
FTO	79068
UGT2A3	79799
EHMT1	79813
KDM8	79831
HSD3B7	80270
TNKS2	80351
KDM7A	80853
ACTL8	81569
MAP1LC3B	81631
ABHD17A	81926
RBP5	83758
EIF2A	83939
HAGHL	84264
ALKBH7	84266
DOT1L	84444
BRSK1	84446
ACTRT3	84517
MYO18B	84700
RIOX2	84864
ABHD13	84945
MYLK2	85366
SDR42E1	93517
ACTR8	93973
SAT2	112483
RDH13	112724
GRIN3A	116443
CYP2R1	120227
LRRK2	120892
H4-16	121504
ACOT4	122970
GRK7	131890
UGT3A1	133688
PXDNL	137902
PTRH1	138428
ACTRT1	139741
MYO3B	140469
ACTRT2	140625
RDH12	145226
ABHD12B	145447
SIK1	150094
PLB1	151056
MBLAC2	153364
RDH10	157506
UGT3A2	167127
ACTL10	170487
SDR16C5	195814
PAOX	196743
ADCY4	196883
CYP4Z1	199974
CES5A	221223
KDM1B	221656
GPC2	221914
CYP4X1	260293
MYO1H	283446
CES4A	283848
ACTL9	284382
CYP4A22	284541
EPHA10	284656
EPHA6	285220
DHRS4L2	317749
CYP26C1	340665
ACTBL2	345651
AGRN	375790
MYO18A	399687
POTEE	445582
WEE2	494551
ACOT1	641371
ACOT6	641372
POTEI	653269
POTEJ	653781
ACTR3C	653857
POTEF	728378
OPN1MW2	728458
ABHD14A-ACY1	100526760
